# Supplementary material for: Concurrent Germline-Somatic Alterations and Associations with Cancer Outcomes: A Systematic Review of Concurrent Data Use
Source: Research Square preprint supplement (doi:10.21203/rs.3.rs-8296996/v1), 2026-02-02
Supplement: Supplementary file 1 [file b206e9fd82b76548816e7600.docx]

**Supplementary Methods**

**Search strategy**

Database searches were conducted on June 15, 2022 and updated on March 8, 2024.

Database Name: PubMed

Platform: National Library of Medicine
Date Searched: 6/15/2022

Updated: 6/15/22 – 3/8/2024

| Item | Concept | Search Strategy |
| --- | --- | --- |
| #1 | Genetic | "Genetic Phenomena"[MeSH Terms:noexp] OR "Biological Evolution"[MeSH Terms] OR "biological evolution*"[Title/Abstract] OR "molecular evolution*"[Title/Abstract] OR "Clonal Evolution"[MeSH Terms] OR "DNA Damage"[MeSH Terms] OR "dna damag*"[Title/Abstract] OR "dna methylation"[MeSH Terms] OR "dna methylation"[Title/Abstract] OR "dna packaging"[MeSH Terms] OR "dna packaging"[Title/Abstract] OR "DNA Repair"[MeSH Terms] OR "dna repair*"[Title/Abstract] OR "DNA Replication"[MeSH Terms] OR "dna replicat*"[Title/Abstract] OR "Gene Expression Regulation"[MeSH Terms:noexp] OR "gene expression regulation*"[Title/Abstract] OR "Gene Rearrangement"[MeSH Terms] OR "gene rearrang*"[Title/Abstract] OR "Genetic Linkage"[MeSH Terms] OR "gene link*"[Title/Abstract] OR "Genetic Structures"[MeSH Terms] OR "genetic structure*"[Title/Abstract] OR "Genetic Variation"[MeSH Terms] OR "genetic varia*"[Title/Abstract] OR "Genomic Instability"[MeSH Terms] OR "genomic instabilit*"[Title/Abstract] OR "genomic stabilit*"[Title/Abstract] OR "Genotype"[MeSH Terms] OR "genotyp*"[Title/Abstract] OR "Mutagenesis"[MeSH Terms] OR "Mutagenesis"[Title/Abstract] OR "Phenotype"[MeSH Terms] OR "phenotype*"[Title/Abstract] OR "Ploidies"[MeSH Terms] OR "ploid*"[Title/Abstract] OR "recombination, genetic"[MeSH Terms] OR "genetic recombination*"[Title/Abstract] OR "selection, genetic"[MeSH Terms] OR "genetic selection*"[Title/Abstract] |
| #2 | Germline Somatic | ("Germ-Line Mutation"[MeSH Terms] OR "germline"[Title/Abstract] OR "germ-line"[Title/Abstract] OR "hereditary"[Title/Abstract] OR "inherit*"[Title/Abstract] OR "Inheritance Patterns"[MeSH Terms]) AND "somatic*"[Title/Abstract] |
| #3 | Cancer/Disease | "Neoplasms"[MeSH Terms] OR "neoplasm*"[Title/Abstract] OR "cancer*"[Title/Abstract] OR "malignan*"[Title/Abstract] OR "adenocarcinoma*"[Title/Abstract] OR "tumor"[Title/Abstract] OR "tumors"[Title/Abstract] OR "tumour*"[Title/Abstract] OR "precision oncolog*"[Title/Abstract] |
| #4 | Interaction Association | "Survival Analysis"[MeSH Terms] OR "Sequence Analysis"[MeSH Terms] OR "analysis"[Title/Abstract] OR "analyses"[Title/Abstract] OR "analyz*"[Title/Abstract] OR "sequenc*"[Title/Abstract] OR "dataset*"[Title/Abstract] OR "data"[Title/Abstract] OR (("genetic*"[Title/Abstract] OR "gene"[Title/Abstract] OR "genes"[Title/Abstract] OR "genom*"[Title/Abstract]) AND ("correlat*"[Title/Abstract] OR "interaction*"[Title/Abstract] OR "associat*"[Title/Abstract])) OR "Genetic Testing"[MeSH Terms] OR "genetic test*"[Title/Abstract] OR "models, genetic"[MeSH Terms] OR "genetic model*"[Title/Abstract] OR "gene model*"[Title/Abstract] OR "genomic model*"[Title/Abstract] |
| #5 | Limits | ((#1 AND #2 AND #3 AND #4) NOT ("Animals"[MeSH Terms] NOT ("Animals"[MeSH Terms] AND "Humans"[MeSH Terms]))) NOT  ("mice"[Title/Abstract] OR "mouse"[Title/Abstract] OR "murine"[Title/Abstract] OR "rat"[Title/Abstract] OR "rats"[Title/Abstract] OR "rodent*"[Title/Abstract] OR "Rodentia"[MeSH Terms] OR "dog"[Title/Abstract] OR "Dogs"[Title/Abstract] OR "Dogs"[MeSH Terms] OR "pig"[Title/Abstract] OR "pigs"[Title/Abstract] OR "piglet*"[Title/Abstract] OR "Swine"[Title/Abstract] OR "Swine"[MeSH Terms] OR "porcine*"[Title/Abstract] OR "Animal Experimentation"[MeSH Terms] OR "models, animal"[MeSH Terms] OR "In Vitro Techniques"[MeSH Terms] OR "cell culture*"[Title/Abstract]) NOT ("editorial"[Publication Type] OR "comment"[Publication Type] OR "news"[Publication Type] OR "editorial"[Title/Abstract] OR "retracted publication"[Publication Type] OR "retraction of publication"[Publication Type] OR "retraction of publication"[Title/Abstract] OR "retraction notice"[Title] OR "retracted publication"[Title/Abstract]) |

Database Name: Cochrane Library

Platform: Wiley & Sons
Date Searched: 6/15/2022
Updated: 6/15/22 – 3/8/2024

| Item | Concept | Search Strategy |
| --- | --- | --- |
| #1 | Genetic | [mh ^"Genetic Phenomena"] OR [mh "Biological Evolution"] OR [mh "Clonal Evolution"] OR [mh "DNA Damage"] OR [mh "DNA methylation"] OR [mh "DNA packaging"] OR [mh "DNA Repair"] OR [mh "DNA Replication"] OR [mh ^"Gene Expression Regulation"] OR [mh "Gene Rearrangement"] OR [mh "Genetic Linkage"] OR [mh "Genetic Structures"] OR [mh "Genetic Variation"] OR [mh "Genomic Instability"] OR [mh "Genotype"] OR [mh "Mutagenesis"] OR [mh "Phenotype"] OR [mh "Ploidies"] OR [mh "recombination, genetic"] OR [mh "selection, genetic"] OR [mh "Sequence Homology"] OR (biological NEXT evolution*) OR (molecular NEXT evolution*) OR (dna NEXT damag*) OR "dna methylation" OR "dna packaging" OR (dna NEXT repair*) OR (dna NEXT replicat*) OR "gene expression regulation" OR "gene expression regulations" OR (gene NEXT rearrang*) OR (gene NEXT link*) OR (genetic NEXT structure*) OR (genetic NEXT varia*) OR (genomic NEXT instabilit*) OR (genomic NEXT stabilit*) OR genotyp* OR Mutagenesis OR phenotype* OR ploid* OR (genetic NEXT recombination*) OR (genetic NEXT selection*) |
| #2 | Germline | ([mh "Germ-Line Mutation"] OR germline OR germ-line OR hereditary OR inherit* OR [mh "Inheritance Patterns"]) AND somatic*) |
| #3 | Cancer/Disease | [mh "Neoplasms"] OR neoplasm* OR cancer* OR malignan* OR adenocarcinoma* OR tumor OR tumors OR tumour* OR (precision NEXT oncolog*) |
| #4 | Interaction Association | [mh "Survival Analysis"] OR [mh "Sequence Analysis"] OR analysis OR analyses OR analyz* OR sequenc* OR dataset* OR data OR ((genetic* OR gene OR genes OR genom*) NEAR/6 (correlat* OR interaction* OR associat*)) OR [mh "Genetic Testing"] OR (genetic NEXT test*) OR [mh "models, genetic"] OR (genetic NEXT model*) OR (gene NEXT model*) OR (genomic NEXT model*) |
| #5 |  | #1 AND #2 AND #3 AND #4 (Word variations have been searched) |

Database Name: Embase

Platform: Elsevier
Date Searched: 6/15/2022
Updated Search: 6/15/22 – 3/8/2024

| Item | Concept | Search Strategy |
| --- | --- | --- |
| #1 | Genetic | 'heredity'/de OR 'evolution'/de OR 'clonal evolution'/de OR 'dna damage'/exp OR 'dna packaging'/de OR 'dna repair'/exp OR 'dna methylation'/de OR 'gene expression regulation'/de OR 'gene rearrangement'/exp OR 'genetic linkage'/exp OR 'gene structure'/exp OR 'genetic variation'/exp OR 'genomic instability'/exp OR 'genotype'/exp OR 'mutagenesis'/exp OR 'phenotype'/exp OR 'ploidy'/exp OR 'genetic recombination'/exp OR 'genetic selection'/exp OR 'biological evolution*':ab,ti OR 'molecular evolution*':ab,ti OR 'dna damag*':ab,ti OR 'dna methylation':ab,ti OR 'dna packaging':ab,ti OR 'dna repair*':ab,ti OR 'dna replicat*':ab,ti OR 'gene expression regulation*':ab,ti OR 'gene rearrang*':ab,ti OR 'gene link*':ab,ti OR 'genetic structure*':ab,ti OR 'genetic varia*':ab,ti OR 'genomic instabilit*':ab,ti OR 'genomic stabilit*':ab,ti OR 'genotyp*':ab,ti OR 'mutagenesis':ab,ti OR 'phenotype*':ab,ti OR 'ploid*':ab,ti OR 'genetic recombination*':ab,ti OR 'genetic selection*':ab,ti |
| #2 | Germline Somatic | ('germline mutation'/exp OR 'inheritance'/exp OR 'germline':ab,ti OR 'germ-line':ab,ti OR 'hereditary':ab,ti OR 'inherit*':ab,ti) AND 'somatic*':ab,ti |
| #3 | Cancer/Disease | 'neoplasm'/exp OR 'neoplasm*':ab,ti OR 'cancer*':ab,ti OR 'malignan*':ab,ti OR 'adenocarcinoma*':ab,ti OR 'tumor':ab,ti OR 'tumors':ab,ti OR 'tumour*':ab,ti OR 'precision oncolog*':ab,ti |
| #4 | Interaction Association | 'survival analysis'/exp OR 'sequence analysis'/exp OR 'genetic screening'/exp OR 'biological model'/exp OR 'analysis':ab,ti OR 'analyses':ab,ti OR 'analyz*':ab,ti OR 'sequenc*':ab,ti OR 'dataset*':ab,ti OR 'data':ab,ti OR 'genetic test*':ab,ti OR 'genetic model*':ab,ti OR 'gene model*':ab,ti OR 'genomic model':ab,ti OR ((('genetic*' OR 'gene' OR 'genes' OR 'genom*') NEAR/6 ('correlat*' OR 'interaction*' OR 'associat*')):ab,ti) |
| #5 |  | #1 AND #2 AND #3 AND #4 AND ([article]/lim OR [article in press]/lim OR [review]/lim) NOT [animals]/lim NOT ([animals]/lim AND [humans]/lim) NOT ('rodent'/exp OR 'dog'/exp OR 'pig'/exp OR 'animal experiment'/exp OR 'animal model'/exp OR 'mice':ab,ti OR 'mouse':ab,ti OR 'murine':ab,ti OR 'rat':ab,ti OR 'rats':ab,ti OR 'rodent*':ab,ti OR 'dog':ab,ti OR 'dogs':ab,ti OR 'pig':ab,ti OR 'pigs':ab,ti OR 'piglet*':ab,ti OR 'swine':ab,ti OR 'porcine*':ab,ti OR 'cell culture*':ab,ti) NOT ('editorial'/exp OR 'letter'/exp OR 'note'/exp OR 'retraction notice'/exp OR 'editorial':ab,ti OR 'retraction of publication':ab,ti OR 'retracted publication':ab,ti OR 'retraction notice':ti) |

Database Name: Web of Science (Core Collection)

Platform: Clarivate Analytics
Date Searched: 6/15/2022
Updated: 6/15/22 – 3/8/2024

| Item | Concept | Search Strategy |
| --- | --- | --- |
| #1 | Genetic | TS=("biological evolution*" OR "molecular evolution*" OR "dna damag*" OR "dna methylation" OR "dna packaging" OR "dna repair*" OR "dna replicat*" OR "gene expression regulation*" OR "gene rearrang*" OR "gene link*" OR "genetic structure*" OR "genetic varia*" OR "genomic instabilit*" OR "genomic stabilit*" OR "genotyp*" OR "mutagenesis" OR "phenotype*" OR "ploid*" OR "genetic recombination*" OR "genetic selection*") |
| #2 | Germline & Somatic | (TS=("germline" OR "germ-line" OR "hereditary" OR "inherit*")) AND TS=("somatic*") |
| #3 | Cancer/Disease | TS=("neoplasm*" OR "cancer*" OR "malignan*" OR "adenocarcinoma*" OR "tumor" OR "tumors" OR "tumour*" OR "precision oncolog*") |
| #4 | Interaction Association | (TS=("analysis" OR "analyses" OR "analyz*" OR "sequenc*" OR "dataset*" OR "data" OR "genetic test*" OR "genetic model*" OR "gene model*" OR "genomic model*" )) OR TS=((("genetic*" OR "gene" OR "genes" OR "genom*") NEAR/6 ("correlat*" OR "interaction*" OR "associat*"))) |
| #5 | Limits | (((#4 AND #3 AND #2 AND #1) NOT TS=("mice" OR "mouse" OR "murine" OR "rat" OR "rats" OR "rodent*" OR "dog"] OR "dogs" OR "pig" OR "pigs" OR "piglet*" OR "swine" OR "porcine*" OR "cell culture")) NOT TS=("editorial" OR "retraction of publication" OR "retracted publication" )) NOT TI=(retraction notice) |

Database Name: CINAHL Plus

Platform: EBSCO*host*
Date Searched: 6/15/2022
Updated Search: 6/15/22 – 3/8/2024

| Item | Concept | Search Strategy |
| --- | --- | --- |
| #S1 | Genetic | ( (MH "Genetics, Medical") OR (MH "Models, Biological") OR (MH "Clonal Hematopoiesis") OR (MH "DNA Damage") OR (MH "DNA Methylation") OR (MH "Gene Rearrangement") OR (MH "Genetic Variation") OR (MH "Genotype") OR (MH "Mutagenicity Tests") OR (MH "Phenotype") ) OR TI ( "biological evolution*" OR "molecular evolution*" OR "dna damag*" OR "dna methylation" OR "dna packaging" OR "dna repair*" OR "dna replicat*" OR "gene expression regulation*" OR "gene rearrang*" OR "gene link*" OR "genetic structure*" OR "genetic varia*" OR "genomic instabilit*" OR "genomic stabilit*" OR "genotyp*" OR "mutagenesis" OR "phenotype*" OR "ploid*" OR "genetic recombination*" OR "genetic selection*" ) OR AB ( "biological evolution*" OR "molecular evolution*" OR "dna damag*" OR "dna methylation" OR "dna packaging" OR "dna repair*" OR "dna replicat*" OR "gene expression regulation*" OR "gene rearrang*" OR "gene link*" OR "genetic structure*" OR "genetic varia*" OR "genomic instabilit*" OR "genomic stabilit*" OR "genotyp*" OR "mutagenesis" OR "phenotype*" OR "ploid*" OR "genetic recombination*" OR "genetic selection*" ) |
| #S2 | Germline & Somatic | TI ( "germline" OR "germ-line" OR "hereditary" OR "inherit*" ) OR AB ( "germline" OR "germ-line" OR "hereditary" OR "inherit*" ) |
| #S3 | Cancer/Disease | (MH "Neoplasms") OR TI ( "neoplasm*" OR "cancer*" OR "malignan*" OR "adenocarcinoma*" OR "tumor" OR "tumors" OR "tumour*" OR "precision oncolog*" ) OR AB ( "neoplasm*" OR "cancer*" OR "malignan*" OR "adenocarcinoma*" OR "tumor" OR "tumors" OR "tumour*" OR "precision oncolog*" ) |
| #S4 | Interaction Association | ( (MH "Survival Analysis+") OR (MH "Sequence Analysis+") OR (MH "Genetic Screening+") ) OR TI ( "analysis" OR "analyses" OR "analyz*" OR "sequenc*" OR "dataset*" OR "data" OR "genetic test*" OR "genetic model*" OR "gene model*" OR "genomic model*" ) OR AB ( "analysis" OR "analyses" OR "analyz*" OR "sequenc*" OR "dataset*" OR "data" OR "genetic test*" OR "genetic model*" OR "gene model*" OR "genomic model*" ) OR TI ( (("genetic*" OR "gene" OR "genes" OR "genom*") N6 ("correlat*" OR "interaction*" OR "associat*")) ) OR AB ( (("genetic*" OR "gene" OR "genes" OR "genom*") N6 ("correlat*" OR "interaction*" OR "associat*")) ) |
| #S5 | Limits | S1 AND S2 AND S3 AND S4 NOT ( (MH "Animals+") OR (MH "Animal Studies") OR (MH "News") OR (MH "Retracted Publication") OR (MH "Retraction of Publication) OR (MH "Congresses and Conferences") OR (MH "Theses and Dissertations") OR (MH "Rodents") OR (MH "Dogs") OR (MH "Swine") OR ("mice" OR "mouse" OR "murine" OR "rat" OR "rats" OR "rodent*" OR "dog" OR "dogs" OR "pig" OR "pigs" OR "piglet*" OR "swine" OR "porcine*" OR "cell culture*") )  Limiters - Peer Reviewed; Research Article Expanders - Apply related words; Apply equivalent subjects |

Database Name: Google Scholar

Platform: Google.com
Date Searched: 6/15/2022
Updated Search: 6/15/22 – 3/8/2024

| Item | Concept | Search Strategy |
| --- | --- | --- |
| #1 | Genetic AND Germline & Somatic AND Cancer AND Interaction Association | (germline AND somatic) AND (genetic expression|genetic structure|genetic variation| genomic stability|genotype|phenotype|DNA damage) AND (cancer|malignancy|tumor) AND (analysis|sequence|data|genetic test|genetic model|(genetic AROUND(6) interaction) |

**Clarifications of study protocol**

Definitions of exclusion criteria:

- Non-human data: Cell lines and skin cultures, in-vitro studies, xenografts without human tissue samples
- Study subjects do not have cancer: If a study examined patients with germline hereditary syndromes with only benign tumors or at risk without being affected. Risk of developing cancer in itself was not considered a study outcome.
- Not original research: Reviews, commentaries. Meta-analyses were considered if original, patient-level work was completed.
- Search term discussed in paper without relevant analysis: Analysis performed but not related to review question, methods development or validation
- Experimental cancer data: Immune microenvironment, cell-free DNA, circulating tumor cells, exosomes, mitochondrial DNA, or similar sources for tumor sequencing data. Papers with only methylation data or expression data were evaluated on a case by case basis and included if data used had clinical relevance.

**Data collection and quality assessment**  *Data Collection Template*

**Study title:** Title of paper / abstract / report that data are extracted from

**PMID (PubMed identifier)**

**Primary Author(s)** Format: Last name, First initial

**Publication Year**

**Conflicts of Interest:** Yes or No

**Study Design (mutually exclusive)**

1. Randomized controlled trial

2. Non-randomized interventional study

3. Cohort study

4. Cross-sectional study

5. Case series / Description of cases

6. Other

**Characteristics of Included Patients**

**Cancer Type(s) Included**

"Multi-cancer" if at least 2 cancer types included or cancer types not specified

(ONLY for patients for whom there is any evaluation of both germline and somatic data)

**Initial Stage(s) of Cancer Included (not mutually exclusive)**

(ONLY for patients for whom there is any evaluation of both germline and somatic data)

1. I

2. II

3. III

4. IV

5. Early-Stage

6. Advanced/Metastatic

7. Other

**Treatment Regimen**

List all treatment regimens included if drugs are known OR "Heterogeneous" if multiple regimens noted but not listed OR "NA" if patients not treated before sample collection

(ONLY for patients for whom there is any evaluation of both germline and somatic data)

**Number of Patients Under Study / Sample Size**

(ONLY for patients for whom there is any evaluation of both germline and somatic data)

**Is this analysis performed in TCGA / PCAWG?**

1. TCGA

2. PCAWG

3. No

**Germline-Somatic Interaction**

**Germline Data**

**Category of Germline Data in Interaction (not mutually exclusive)**

1. Variants/SNPs

2. Genes

3. Chromosomal Regions

4. Copy-Number Variation

5. Other

**Names of Germline Data**

List variants, genes, regions, variants, etc. Should include specific gene list, panel with commercial name if this contains a standard list of genes)

**Somatic Data**

**Category of Somatic Data in Interaction (not mutually exclusive)**

1. Variants

2. Genes

3. Chromosomal Regions

4. Somatic Copy Number Alterations

5. Other

**Names of Somatic Data**

List variants, genes, regions, variants, etc. Should include specific gene list, panel with commercial name if this contains a standard list of genes)

**FOR OUR GROUP USE ONLY: Results - Tables / Data Location**

**IF INTERACTION ASSESSED**

**Germline-Somatic Interactions**

-In Silico: Estimated gene expression, mutational signatures, loss of heterozygosity, replication only, other

-Clinical biomarker: Cancer subtypes, specific gene mutations / molecular features that are biomarkers of treatment, tumor mutational burden (TMB), other

-Clinical outcome: Response rate, hazard ratio, progression-free interval, progression-free survival, disease-free survival, overall survival, %survival at __ time, other

NOTE: Interaction DOES NOT have to include statistical testing (particularly if n is small) - OK to note test method as "Descriptive"

|  | **Interaction Data Type (see list)** | **Statistical Test Method (if used) OR Descriptive** | **Effect Size (if given)** | **95% CI (if given)** | **P-Value (if given)** |
| --- | --- | --- | --- | --- | --- |
| **Interaction** |  |  |  |  |  |

**IF INTERACTION TESTING NOT PERFORMED**

**Patients with Germline / Somatic / Outcomes**

Measures in Study:

-In Silico: Estimated gene expression, mutational signatures, loss of heterozygosity, replication only, other

-Clinical biomarker: Cancer subtypes, specific gene mutations / molecular features that are biomarkers of treatment, tumor mutational burden (TMB), other

-Clinical outcome: Response rate, hazard ratio, progression-free interval, progression-free survival, disease-free survival, overall survival, %survival at __ time, other

|  | **Measure** | **Number included for Germline Only** | **Result for Germline Only** | **Number included for Somatic Only** | **Result for Somatic Only** | **Number included for Germline + Somatic** | **Result for Germline + Somatic** |
| --- | --- | --- | --- | --- | --- | --- | --- |
| **Measure in Study 1** |  |  |  |  |  |  |  |
| **Measure in Study 2 (if relevant)** |  |  |  |  |  |  |  |
| **Measure in Study 3** |  |  |  |  |  |  |  |
| **Measure in Study 4** |  |  |  |  |  |  |  |
| **Measure in Study 5** |  |  |  |  |  |  |  |

**IF TESTED IN ADDITIONAL VALIDATION DATASET**

**Validation Germline-Somatic Interactions**

-Wet Lab: Measured gene expression, protein levels, other

**Only fill out complete chart for In Silico Data / Clinical Data**

**In Silico: Estimated gene expression, mutational signatures, loss of heterozygosity, replication only, other

**Clinical biomarker: Cancer subtypes, specific gene mutations / molecular features that are biomarkers of treatment, tumor mutational burden (TMB), other

**Clinical outcome: Response rate, hazard ratio, progression-free interval, progression-free survival, disease-free survival, overall survival, %survival at __ time, other

NOTE: Interaction DOES NOT have to include statistical testing (particularly if n too small) - OK to note test method as "Descriptive"

|  | **Validation Data Set (Description)** | **Interaction Data Type (see list)** | **Statistical Test Method (if used) OR Descriptive** | **Effect Size (if given)** | **95% CI (if given)** | **P-Value (if given)** |
| --- | --- | --- | --- | --- | --- | --- |
| **Interaction** |  |  |  |  |  |  |

**Types of Cancer(s) - Validation Dataset**

"Pan-cancer" if multiple cancers included and not specified

**Stages of Cancer(s) - Validation Dataset (not mutually exclusive)**

1. I

2. II

3. III

4. IV

5. Early Stage

6. Advanced/Metastatic

**FOR OUR GROUP USE ONLY: Comments**

*Quality Assessment Template*

**PARTICIPANTS / DATA SOURCES: Were appropriate data sources for sequencing used?**

1. Yes: Participant group clearly described, consistent data generation methods

2. No: Data from pre-existing data source not intended to interrogate germline/somatic sequencing, or participant group not clearly described / not consistent data generation

3. No information: Information on participant group is not clear

**PARTICIPANTS / DATA SOURCES: Were all inclusions / exclusions of patients for sequencing data appropriate?**

1. Yes: Participant group adequately represents disease population of interest

2. No: Specific subgroups of patients are excluded that would likely alter the results

3. No information: Information on participant group is not clear

**PARTICIPANTS / DATA SOURCES: Risk of bias introduced by data sources**

1. Low risk of bias

2. High risk of bias

3. Unclear risk of bias

**PREDICTORS / GERMLINE/SOMATIC DATA: Were germline / somatic sequencing of interest defined / assessed in a similar way for all samples?**

1. Yes: "Germline" / "Somatic" defined / assessed in the same way for all participants

2. No: "Germline" / "Somatic" defined / assessed differently across all participants

3. No information: No information on how "Germline" and "Somatic" were defined or assessed

**PREDICTORS / GERMLINE/SOMATIC DATA: Was interaction testing / description made without knowledge of outcome?**

1. Yes: Outcome data NOT used to build germline/somatic predictive models

2. No: Outcome data used to build germline/somatic data prediction (redundant)

3. No information: No information on how "Germline" and "Somatic" were defined or assessed

**PREDICTORS / GERMLINE/SOMATIC DATA: Were germline and somatic data both available at the time of data analysis?**

1. Yes: Both available at time of analysis

2. No: 1+ not available at time of analysis

3. No information: No information on how "Germline" and "Somatic" were defined or assessed

**PREDICTORS / GERMLINE/SOMATIC DATA: Risk of bias introduced by actual data**

1. Low risk of bias

2. High risk of bias

3. Unclear risk of bias

**INTERACTION TESTING / OUTCOME: Was the outcome determined appropriately?**

1. Yes: The outcome is justified by the authors upfront

2. No: The outcome is chosen by the authors without justification

3. No information: No information available on how outcomes were chosen by authors

**INTERACTION TESTING / OUTCOME: Was a standard definition of outcome used?**

1. Yes: Outcomes in study have a standard definition in the literature.

2. No: Outcomes in study are not consistent with standard field definition or authors created outcome measure

3. No information: No information available on how outcomes were chosen by authors

**INTERACTION TESTING / OUTCOME: Were germline/somatic data excluded from the definition of outcome?**

1. Yes: Germline and somatic data totally separate from outcome

2. No: Germline or somatic data directly part of outcome (redundant)

3. No information: No information available on how outcomes were chosen by authors

**INTERACTION TESTING / OUTCOME: Was outcome defined the same for all participants in study?**

1. Yes: Outcomes across all patients were defined the same way

2. No: Outcomes not defined the same across patients

3. No information: No information available on how outcomes were chosen by authors

**INTERACTION TESTING / OUTCOME: Was outcome determined without prior knowledge of germline/somatic data?**

1. Yes: Outcome collected separately of germline/somatic data analysis

2. No: Germline/somatic data directly used to determine outcome

3. No information: No information available on how outcomes were chosen by authors

**INTERACTION TESTING / OUTCOME: Was time interval between germline/somatic data and outcome of interest appropriate?**

1. Yes: The time interval between germline/somatic data and outcome makes sense to predict the outcome

2. No: Time interval is too short / too long for the outcome measured to be linked with germline/somatic data

3. No information: No information available on how outcomes were chosen by authors

**INTERACTION TESTING / OUTCOME: Risk of bias associated with interaction testing / association with outcome**

1. Low risk of bias

2. High risk of bias

3. Unclear risk of bias

**ANALYSIS: Was there a reasonable "n" for the interaction/association testing?**

A domain where all signaling questions are answered as Y should be judged as “low risk of bias.” An answer of N on 1 or more questions flags the potential for bias, whereas NI indicates insufficient information.

When judging ROB for a particular domain, reviewers thus need to use their judgment to determine whether issues identified by the signaling questions are likely to have introduced bias into the model development or validation.

1. Yes: If at least 20 patient samples included to develop a model or 100 patient samples included for data validation

2. No: If <20

3. Insufficient information

**ANALYSIS: Were continuous or categorical measures handled appropriately?**

1. Yes: Continuous measures not dichotomized

2. No: No prespecified analytic approach to genetic data

3. Insufficient information

**ANALYSIS: Were all study subjects included in analysis?**

1. Yes: All participants assessed for germline / somatic data and outcome

2. No: Small subset of participants assessed for germline / somatic / outcome only

3. Insufficient information

**ANALYSIS: Were patient samples with missing data handled appropriately?**

1. Yes: Procedure outlined for missing data

2. No: Participants with missing data were simply omitted from analysis without discussion OR clearly flawed handling method (making up values)

3. Insufficient information

**ANALYSIS: Was selection of predictors based on univariable analysis avoided?**

1. Yes: Germline/somatic genes involved in interactions WERE NOT selected through univariate modeling

2. No: Germline/somatic genes involved in interactions WERE selected through univariate modeling

3. Insufficient information

**ANALYSIS: Were complexities in the data (censoring, competing risks, sampling of control participants) accounted for appropriately?**

1. Yes: Complexities in data were evaluated or explained as unimportant for analysis

2. No: Complexities in data were not addressed and could affect germline/somatic interactions and associations with outcomes

3. Insufficient information

**ANALYSIS: Were appropriate model performance measures used?**

1. Yes: Performance measures of outcome were statistically assessed

2. No: Outcomes use survival curves without censoring, no performance measures / prediction calculated

3. Insufficient information

**ANALYSIS: Was model overfitting accounted for?**

1. Yes: Validation of germline/somatic data ~ outcome was performed

2. No: No validation of germline/somatic data ~ outcome

3. Insufficient information

**ANALYSIS: Do predictors and their assigned weights (germline / somatic genes) correspond to results from a final multivariable analysis?**

1. Yes: Regression coefficients of genes used in any predictive model do correspond to a multivariable analysis

2. No: No correspondence to a multivariable analysis

3. Insufficient information

**ANALYSIS: Risk of bias due to analysis**

1. Low risk of bias

2. High risk of bias

3. Unclear risk of bias

**Supplementary Figure / Table Captions**

**Supplementary Figure S1:** Distribution of study attributes by publication year (X-axis). Panel A: Study designs with count of studies on Y-axis. Panel B: Number of patients described as included in study. 3 outliers (14340 patients, 23000 patients, and 234154 patients) are not shown, but were all published in 2021. Panel C: Germline data types with count of studies on Y-axis. Panel D: Somatic data type with count of studies on Y-axis. Panel E: Whether or not an interaction was demonstrated between germline and somatic data and an outcome – yes or no.

**Supplementary Figure S2:** “Traffic light” plots of the domain-level risk of bias assessments for each individual study.

**Supplementary Table 1:** All 197 studies included in this systematic review with extracted data.

**Supplementary Table 2:** Excluded studies with reason for exclusion.

**Supplementary Table 3:** All germline-somatic data pairs identified and their frequency among the 197 studies included.
