# Supplementary material for: Concurrent Germline-Somatic Alterations and Associations with Cancer Outcomes: A Systematic Review of Concurrent Data Use
Source: Research Square preprint supplement (doi:10.21203/rs.3.rs-8296996/v1), 2026-02-02
Supplement: Supplementary file 2 [file cb545660c594f5550e9f2ecf.xlsx]

## Sheet: S1
Articles Inlcuded in Systematic Review
Covidence #	Study ID	Title	PMID	Primary Author(s)	Publication Year	Conflicts of Interest	Study Design	Cancer Type(s) Included	Initial Stage(s) of Cancer Included	Treatment Regimen	Number of Patients Under Study / Sample Size	Is this analysis performed in TCGA / PCAWG?	Category of Germline Data in Interaction	Names of Germline Data	Category of Somatic Data in Interaction	Names of Somatic Data	Outcome	Interaction?	Interaction Finding	Interaction Statistical Test Method (if used) OR Descriptive	Interaction Effect Size (if given)	Interaction 95% CI (if given)	Interaction P-Value (if given)	Germline/Somatic/Outcomes Listed?	Measure in Study 1 Measure	Measure in Study 1 Number included for Germline Only	Measure in Study 1 Result for Germline Only	Measure in Study 1 Number included for Somatic Only	Measure in Study 1 Result for Somatic Only	Measure in Study 1 Number included for Germline + Somatic	Measure in Study 1 Result for Germline + Somatic	Measure in Study 2 (if relevant) Measure	Measure in Study 2 (if relevant) Number included for Germline Only	Measure in Study 2 (if relevant) Result for Germline Only	Measure in Study 2 (if relevant) Number included for Somatic Only	Measure in Study 2 (if relevant) Result for Somatic Only	Measure in Study 2 (if relevant) Number included for Germline + Somatic	Measure in Study 2 (if relevant) Result for Germline + Somatic	Measure in Study 3 Measure	Measure in Study 3 Number included for Germline Only	Measure in Study 3 Result for Germline Only	Measure in Study 3 Number included for Somatic Only	Measure in Study 3 Result for Somatic Only	Measure in Study 3 Number included for Germline + Somatic	Measure in Study 3 Result for Germline + Somatic	Measure in Study 4 Measure	Measure in Study 4 Number included for Germline Only	Measure in Study 4 Result for Germline Only	Measure in Study 4 Number included for Somatic Only
630	Chang 2016	MultiDimensional ClinOmics for Precision Therapy of Children and Adolescent Young Adults with Relapsed and Refractory Cancer: A Report from the Center for Cancer Research	26994145	Chang, W	2016	Yes	Case series / Description of cases	Multi-cancer	All	Heterogeneous	32	No	Genes	ABCA1, ATM, CEP57, LAMB2, NPR2, NTRK1, PKP2, PRRT2, PTEN, TP53, BLM, BRCA1, NSD1, RET, SOX2, TP53, TSC1, TSC2	Genes	OR5H14, BAX, GSG1L, MAGEC2, OTOF, PTEN, ANKRD27, GREB1L, VASP, ZNF879, EMCN, FCRL5, HEATR4, PRSS3, RPL29, ZNF783, CBX4, LTN1, MCEE, NRN1L, ANKRD18B, ARMC3, BCOR, FLNC, LMBR1, PCYOX1L, RASA1, SNRK, SETD1B, XPO1, BRPF3, LONP1, MAGEB10, SYT10, U2SURP, FAM193A, TNS1, MCM9, MYOF, PRMT6, MCM9, PRMT6, ARID1A, PAPLN, SBF1, SETD2, ASPM, TMCO3, VPS13B, HERC2, AHNAK, CREBBP, TLX1NB, APBB2, EIF2AK3, MAN1C1, …	Prognostic: Relapse	N						Y	Prognostic: Relapse	4	1 Relapsed; 3 NA	25	16 Relapsed, 2 Refractory, 7 NA	3	1 NA, 2 Relapsed
6165	Lawrence 2018	Recurrent loss of heterozygosity correlates with clinical outcome in pancreatic neuroendocrine cancer	30062048	Lawrence, B	2018	No	Cross-sectional study	Pancreatic Neuroendocrine	Unknown	Heterogeneous	47	PCAWG	Genes	AFF4, AKT2, ALK, APC, ATIC, ATM, ATR, BAP1, BCL11A, BIVM-ERCC5, BRIP1, BUB1B, CBLB, CDH1, CRTC3, DDR2, EP300, ERBB2, ERBB3, ERCC4, FLT3, FLT4, GPC3, JAK2, KDM5C, KIT, KMT2C, MECOM, MEN1, MRE11A, MSH3, MUTYH, MYC, NBN, NOTCH1, NOTCH2, NUP98, PBRM1, PDGFRA, PER1, PIK3R1, PMS1, PMS2, RET, RNF43, SDHA, SMAD2, SMARCE1, SMO, SPEN, STK11, THRAP3, TSC1, TSC2, WRN, XPC, ZRSR2	Genes	ARID1B, ATIC, ATRX, BCL11B, BCOR, BCR, BRCA2, BRIP1, CHD6, CHEK2, CIC, CLP1, CLTC, CLTCL1, CTNNB1, DAXX, ECT2L, EGFR, ELN, FGFR3, FLCN, FUBP1, HOXD11, JAK2, MECOM, MEN1, MSH2, NOTCH2, PAX6, PBRM1, PCM1, PTEN, RAB4B, RET, SMAD4, SYT1, TGFBR2, TP53, TRRAP, VHL, VTI1A, XPC, YY1	Prognostic: Overall Survival	N						Y	Prognostic: Overall Survival	12	9 alive, 3 dead	1	1 dead	34	4 dead, 30 alive
8188	Chong 2023	Integrated exome sequencing and microarray analyses detected genetic defects and underlying pathways of hepatocellular carcinoma	37418972	Chong, ML	2023	No	Cohort study	HCC	Other	NA	34	No	Variants/SNPs	ALDH (p.E504K)	Genes	TP53, AXIN1, CTNNB1, SMARCA4, AKT3, MYC, TERT, CDH1, TP53, IRF2, RPL5, RB1, PTEN	Clinical: Grade, Stage; Prognostic: Recurrence	N						Y	Clinical: Grade	0	NA	15	0 grade I, 4 grade II, 11 grade III	19	0 grade I, 8 grade II, 11 grade III	Clinical: Stage (BCLC)	0	NA	15	9 stage A, 2 stage B, 4 stage C	19	9 stage A, 1 stage B, 9 stage C	Prognostic: Recurrence	0	NA	15	10 not recurrent 5 recurrent	19	13 not recurrent; 6 recurrent
459	Bu 2021	Germline ALK variations are associated with a poor prognosis in glioma and IDH-wildtype glioblastoma	33486679	Bu, L	2021	No	Cross-sectional study	Brain Cancer	Advanced/Metastatic	Heterogeneous	17	No	Genes	ALK	Genes	IDH1, BIRC5, PIK3CA, RPN1, TP53	Prognostic: Overall Survival	Y	ALK-mutation (g), TP53 mutated (s) GBM - g+s has worse survival	Kaplan Meier	NA	NA	0.031	N
8262	Gordhandas 2023	Comprehensive analysis of germline drivers in endometrial cancer	36744932	Gordhanas, S	2023	Yes	Cohort study	Uterine Cancer	All	Heterogeneous	95	No	Genes	APC, ATM, BARD1, BLM, BRCA1, BRCA2, BRIP1, CDKN2A, CHEK2, ERCC3, FANCA, FANCC, FH, FLCN, MITF, MLH1, MRE11A, MSH2, MSH6, MUTYH, NBN, NTHL1, PALB2, PMS2, RAD51b, RAD51D, RB1, RECQL, RECQL4, RET, RTEL1, SDHA, SMARCA4, TP53, VHL	Loss of Heterozygosity (LOH)	APC, ATM, BARD1, BLM, BRCA1, BRCA2, BRIP1, CDKN2A, CHEK2, ERCC3, FANCA, FANCC, FH, FLCN, MITF, MLH1, MRE11A, MSH2, MSH6, MUTYH, NBN, NTHL1, PALB2, PMS2, RAD51b, RAD51D, RB1, RECQL, RECQL4, RET, RTEL1, SDHA, SMARCA4, TP53, VHL	Clinical: Subtype, Prognostic: FIGO Stage	Y	Subtypes: 25% of POLE, 39% of MSI-H, 45% of CN-H, and 16% of CN-L tumors. gPVs and biallelic loss were younger at diagnosis compared with patients with monoallelic loss	Fisher's exact test	NA	NA	>0.99, 0.69	N
3550	Robinson 2017	Integrative clinical genomics of metastatic cancer	28783718	Robinson, D	2017	No	Cohort study	Multi-cancer	Advanced/Metastatic	Heterogeneous	500	No	Variants/SNPs	APC, BRCA1, BRCA2, BRIP1, DICER1, FANCA, MLH1, MSH2, MUTYH, PALB2, RAD51D, RB1, ATM, CHEK2, HOXB13, MITF, NBN, RAD50	Other	2943 Gene Panel	Prognostic: Metastasis	Y	30/61 individuals with pathogenic germline mutations had a somatic second allele aberration within the tumour genome, including loss of heterozygosity, and exhibited molecular phenotypes leading to their metastatic disease.	Descriptive	NA	NA	NA	N
640	Chatrath 2021	Germline variants predictive of tumor mutational burden and immune checkpoint inhibitor efficacy	33786423	Chatrath, A	2021	No	Non-randomized interventional study	Multi-cancer	Advanced/Metastatic	Heterogeneous	140	No	Genes	APC, FANCL, SLC25A13, ERCC3, MSH6, PMS2	Mutational Signature	TMB	Predictive: TMB	Y	Germline-variant-associated TMBs have a more significant effect on responsiveness than can be expected from the differences in TMB alone.	Odds ratio	OR: 1.842	NA	0.0341	N
3276	Pearlman 2017	Prevalence and Spectrum of Germline Cancer Susceptibility Gene Mutations Among Patients With Early-Onset Colorectal Cancer	34873480	Liao, H	2021	Yes	Cross-sectional study	Colon Cancer	Not Applicable	Heterogeneous	133	No	Genes	APC, MLH1, MSH2, MSH6, PMS2, MUTYH, PTEN, TP53, STK11, SMAD, MRE11A, RAD50, MLH1, MSH2, MSH6, PMS2, POLD1, ATM, ATR, BARD1, BLM, BRCA1, BRCA2, BRIP1, CHEK1, CHEK2, FANCA, FANCC, FANCD2, FANCG, MUTYH, PALB2, POLE, TP53, PRKDC, CUL3, ERCC1, FANCE, FANCF, FANCL, RAD51, WEE1	Genes	MLH1, MSH2, MSH6, APC, MUTYH, BRCA2, ATM, BLM, CHEK2, RAD50, ATR, PMS2, TP53, FANCA, FANCD2, BARD1, PALB2, BRCA1, BRIP1, FANCG, STK11	Predictive: TMB	Y	When a somatic hit occurred in DDR genes (where germline present), TMB (median TMB 77.4 vs 10.5) and MSI-H increased (68.4% vs 29.8%)	Mann-Whitney U test	NA	NA	TMB P=0.002, MSI-H P=0.003	N
3185	Pan 2021	Germline APOBEC3B deletion increases somatic hypermutation in Asian breast cancer that is associated with Her2 subtype, PIK3CA mutations, and immune activation	33423300	Pan, J-W	2021	No	Cohort study	Breast Cancer	All	NA	516	No	Variants/SNPs	APOBEC3B (deletion)	Mutational Signature	Signature 2 and 13 somatic hypermutation	Prognostic: Overall Survival	Y	Germline A3B copy number and Signature 2 and 13 somatic hypermutation are not associated significantly with overall survival	Cox proportional hazards	NA	NA	Not significant	N
8384	Liu 2023	Somatic and germline aberrations in homologous recombination repair genes in Chinese prostate cancer patients	37064136	Liu, Y	2023	No	Cross-sectional study	Prostate Cancer	Early-Stage	s/p Surgery	29	No	Genes	AR, ATM, ATR, BARD1, BRAF, BRCA1/2, BRIP1, CDH1, CDK12, CHEK2, FANCA, FANCL, KRAS, NBN, NRAS, PALB2, PPP2R2A, PTEN, RAD51B, RAD51D, RAD54L, TP53	Genes	AR, ATM, ATR, BARD1, BRAF, BRCA1, BRCA2, BRIP1, CDH1, CDK12, CHEK2, FANCA, FANCL, KRAS, NBN, NRAS, PALB2, PPP2R2A, PTEN, RAD51B, RAD51D, RAD54L, TP53	Clinical: PSA; Gleason Score	N						Y	Clinical: PSA; Gleason Grade	4	0-10: 2, Unknown: 2	22	Unknown: 5, 0-10: 5, 11-20: 5, 21-100: 6, >100: 1	3	0-10: 3	Clinical: Gleason Score	4	Unknown, 8, 9-10, 3+3	22	Unknown: 1, 3+4: 5, 4+3: 4, 8: 2, 9-10: 10	3	3+4: 3
7937	Park 2022	Clinico-genomic Characterization of ATM and HRD in Pancreas Cancer: Application for Practice	36040493	Park W,	2022	Yes	Cross-sectional study	Pancreatic Cancer	All	Heterogeneous	16	No	Genes	ATM	Genes	ATM	Prognostic: Overall Survival	Y	Overall survival increased with G+S ATM vs. somatic ATM alone	Kaplan Meier	27.1 months vs. 12.3 months	22.7 months to NR vs. 11.9 months to NR	0.02	Y	Prognostic: Overall Survival	0	NA	8	5 PD, 1 PR, 2 SD	8	0 PD, 6 PR, 1 SD, 1 allergic reaction
2051	Kaur 2020	Genomic and Clinicopathologic Characterization of ATM-deficient Prostate Cancer	32694154	Kaur, H	2020	Yes	Cross-sectional study	Prostate Cancer	Early-Stage	NA	20	No	Genes	ATM	Genes	ATM	Clinical: Gleason Score, Stage	N						Y	Clinical: Stage	7	5 stage III, 2 stage II	0	NA	7 certain and 6 uncertain for somatic	8 stage III, 5 stage II	Clinical: Gleason Score	7	5 Gleason 9, 1 Gleason 8, 1 Gleason 7	0	NA	7 certain and 6 uncertain for somatic	7 Gleason 9, 1 Gleason 8, 4 Gleason 7, 1 Gleason 6
8357	Lampson 2023	Rare Germline <i>ATM</i> Variants Influence the Development of Chronic Lymphocytic Leukemia	36315919	Lampson, BL	2023	Yes	Cross-sectional study	Hematologic Malignancies	Other	NA	825	No	Genes	ATM	Genes; Chromosomal Regions	ATM, Chr11 (11q del)	Prognostic: Overall Survival	Y	Germline ATM+/- somatic ATM and del(11q) -> del 11q with either germline or somatic variant is worse than neither	Kaplan Meier	NA	NA	0.58	N
7672	Berchuck 2022	Addition of Germline Testing to Tumor-Only Sequencing Improves Detection of Pathogenic Germline Variants in Men With Advanced Prostate Cancer	36103646	Berchuck, JE	2022	Yes	Randomized controlled trial	Prostate Cancer	All	Heterogeneous	65	No	Genes	ATM, BRCA1, BRCA2, CHEK2, PMS2, FANCC, FH, MITF, MUTYH, SDHC, MSH6, MSH2, BRIP1, MLH1	Genes	ATM, BRCA1, BRCA2, CHEK2, PMS2, FANCC, FH, MITF, MUTYH, SDHC, MSH6, MSH2, BRIP1, MLH1	Clinical: Hormone Sensitivity	N						Y	Clinical: Hormone Sensitivity	6	4 M0 and 1 MH and 1 MC	45	7 m0 7 mH 31 mC	14	2 M0 1 MH 11 MC
3098	Oak 2020	Ancestry-specific predisposing germline variants in cancer	32471518	Oak, N	2020	Yes	Cross-sectional study	Multi-cancer	All	Heterogeneous	13	TCGA	Genes	ATM, BRCA2, FH, SDHB, VHL, POLE	Genes	ATM, BRCA2, FH, SDHB, VHL, POLE	In Silico: RNA Expression Quantile	N						Y	In Silico: RNA Expression Quantile	10	afr SDHB PCPG NA 0.005434783 afr FH KIRP NA 0.010344828 afr BRCA2 OV NA 0.064150943 afr_admix SDHB PCPG NA 0.097826087 afr BRCA2 LUSC NA 0.157684631 afr ATM PRAD NA 0.289527721 afr PTEN UCEC NA 0.305882353 afr PTEN UCEC NA 0.305882353 afr_admix VHL KIRC NA 0.667293233 afr BRCA2 LUSC NA 0.776447106	0	NA	3	afr VHL KIRC p.E186* 0.896616541 afr ATM PRAD p.E2164K 0.899383984 afr_admix FH KIRP p.X464_splice 0.020689655
625	Chang 2020	Patterns of germline and somatic mutations in 16 genes associated with mismatch repair function or containing tandem repeat sequences	31769227	Chang, SC	2020	No	Cohort study	Colon Cancer	All	NA	76	No	Genes	AXIN1, AXIN2, BAX, CTNNB1, EPCAM, EXO1, MLH1, MSH2, MSH3, MSH6, PCNA, PMS1, PMS2, POLD1, POLE, TGFBR2	Genes	AXIN1, AXIN2, BAX, BRAF, CTNNB1, EPCAM, EXO1, MLH1, MSH2, MSH3, MSH6, PCNA, PMS1, PMS2, POLD1, POLE, TGFBR2	Predictive: Somatic mutation burden	N						Y	Predictive: Somatic mutation burden (EMAST)	0	NA	24	121.9 ¬± 53.4	52	122.3 ¬± 64.0	Predictive: TMB Predictive: Somatic mutation burden (MSI-H)	0	NA	23	112.4 ¬± 54.5	51	106.9 ¬± 54.5
2558	Lu 2016	Molecular Predictors of Long-Term Survival in Glioblastoma Multiforme Patients	27124395	Lu, J	2016	No	Cross-sectional study	Brain Cancer	Other	Heterogeneous	591	TCGA	Genes	B3GALT5, TGS1	Genes	IDH1	Prognostic: Overall Survival	Y	Long term survival model includes B3GALT5, TGS1 (germline), IDH1 (somatic)	Logistic Regression	AUC = 0.52 (B=-0.28, -0.18), IDH1: B = 1.10	NA	Not significant	N
1377	Ghafoor 2021	Phase 2 Study of Olaparib in Malignant Mesothelioma and Correlation of Efficacy With Germline or Somatic Mutations in BAP1 Gene	34661178	Ghafoor, A	2021	No	Non-randomized interventional study	Mesothelioma	Advanced/Metastatic	Targeted Therapy: PARP (Olaparib)	11	No	Genes	BAP1, MRE11A	Genes	BAP1	Prognostic: Progression-Free Survival, Overall Survival	N						Y	Prognostic: Progression-Free Survival	3	3.6, 1.3, 3.2	6	2.8, 2.7, 4.1, 3.9, 1.5, 4.1	2	6.9, 1.4	Prognostic: Overall Survival	3	4.5, 3.1, 4.9	6	4.1, 5.4, 11.2, 8.7, 8.8, 16.7	2	14.4, 4.7
5576	Forde 2021	Durvalumab with platinum-pemetrexed for unresectable pleural mesothelioma: survival, genomic and immunologic analyses from the phase 2 PrE0505 trial	34750557	Forde, PM	2021	Yes	Non-randomized interventional study	Mesothelioma	Advanced/Metastatic	Mixed: Durvalumab, Pemetrexed, Cisplatin	40	No	Genes	BAP1, PTCH1, BLM	Genes	BAP1, CDKN2A, NF2, SETD2, PBRM1, TP53, BLM, LATS2, PTCH1, ARID1A, ARID1B, KDM3B/4C, KMT2C, NOA1, EZH2	Prognostic: Progression-Free Survival, Overall Survival	N						Y	Prognostic: Progression-Free Survival	0	NA	35	< 6 months: 11 patients 6-12 months: 19 patients > 12 months: 5 patients	5	< 6 months: 2 patients 6-12 months 3 patients	Prognostic: Overall Survival	0	NA	35	< 12 months: 10 patients 12-24 months: 13 patients > 24 months 12 patients	5	<12 months: 2 patients 12-24 months 3 patients
8376	Lim 2023	Somatic inactivation of breast cancer predisposition genes in tumors associated with pathogenic germline variants	36315097	Lim, BWX	2023	No	Cross-sectional study	Breast Cancer	Early-Stage	Heterogeneous	57	No	Genes	BLM, CDK9, CTH, ERCC5, FANCM, MUTYH, PARP2, RAD50, RAD51B, WRN, PARP2	Genes	TP53, PIK3CA	Predictive: Signature 3	N						Y	Predictive: Signature 3	23	NA:14, Weak: 4, No: 2, Strong: 3	0	NA	34	NA: 18, Weak: 4, No: 7, Strong: 5
108	Amikura 2006	Mutational analysis of TP53 and p21 in familial and sporadic ovarian cancer in Japan	16337994	Amikura, T	2006	No	Case-Control	Ovarian Cancer	All	NA	139	No	Genes	BRCA1	Genes	TP53	Clinical: Subtype, Stage	Y	Among patients with germline BRCA1 mutations, there was no significant difference between pathology subtype or FIGO stage between +TP53 mutation and no TP53 mutation. However, among patients with sporadic TP53 mutations alone, there was a significant association with TP53 mutation (vs. not present) and pathology subtype as well as FIGO stage.	Chi-squared test	NA	NA	BRCA1+: Not significant for TP53mut+ vs.-; BRCA1WT: P=0.0038 (pathology subtype), P=0.024 (FIGO stage)	N
2240	Kringen 2005	TP53 mutations in ovarian carcinomas from sporadic cases and carriers of two distinct BRCA1 founder mutations; relation to age at diagnosis and survival	16229746	Kringen, P	2005	No	Cross-sectional study	Ovarian Cancer	All	NA	30	No	Genes	BRCA1	Genes	TP53	Clinical: Age at Diagnosis, Prognostic: Overall Survival	N						Y	Clinical: Age at Diagnosis	11	50,44,47,59,46,43,48,44, 60, 44, 47			19	53,65,53,59,39,49,51,39,50,39,39,53,41,48,52,80,58,49,50	Prognostic: Overall Survival	11	39, 8, 30, 20, 120, 199, 108, 9, 45, 117, 96			19	83,22,83,11,61,84,25,15,36,35,21,93,1,46,36,12,30,134,19	Vital Status	11	alive w/o cancer: 2, alive w/ cancer: 1, dead: 8			19	alive w/o cancer: 3, alive w/ cancer: 0, dead: 16
4907	Alvarez 2016	Different Array CGH profiles within hereditary breast cancer tumors associated to BRCA1 expression and overall survival	26979459	Alvarez, C	2016	No	Cohort study	Breast Cancer	Early-Stage	NA	47	No	Genes	BRCA1, BRCA2	Somatic Copy-Number Alterations	Array CGH	Prognostic: Overall Survival	Y	Cluster characterized by lossess on chromosomes 2, 3, 12, 20 has worse survival than three other clusters. high genomic instability cluster also associated with poor overall survival	Kaplan Meier	NA	NA	0.02221, 0.02	N
7633	Konstantinopoulos 2019	Olaparib and Œ±-specific PI3K inhibitor alpelisib for patients with epithelial ovarian cancer: a dose-escalation and dose-expansion phase 1b trial	30880072	Konstantinopoulos, PA	2019	Yes	Non-randomized interventional study	Multi-cancer	Advanced/Metastatic	Targeted Therapy: PARP (Olaparib, Alpelisib)	25	No	Genes	BRCA1, BRCA2	Genes	ATM, ATRX, BRIP1, FANCA, FANCB, FANCF, FANCM, NBN, PALB2, MTOR, PIK3C2B, PIK3CA, PTEN, TSC1, TSC2	Predictive: Objective response rate, Duration of Treatment Response	N						Y	Predictive: Objective response rate	3	(1) Partial Response, (2) Stable Disease	15	5 partial response; 7 stable disease; 2 progressive disease; 1 unevaluable	7	3 Partial Response; 4 Stable Disease	Predictive: Duration of Treatment Response	3	~380, ~150, ~50	15	Various	7	Various
8319	Jin 2023	Landscape of DNA damage response gene alterations in breast cancer: A comprehensive investigation	36655350	Jin, J	2023	No	Cross-sectional study	Breast Cancer	All	Heterogeneous	438	No	Genes	BRCA1, BRCA2	Genes	ATR, PRKDC, BRCA2, ATM, SLX4, BRCA1, RAD50, FANCA, FANC1, PALB2, BARD1, MLH1, MSH6, NBN, FANCM, MSH3, RAD51C, MLH3, BRAXAS1, ERCC2	Prognostic: Disease-Free Survival, Overall Survival	Y	Both germline and somatic DDR mutations showed a longer DFS than those with no germline or somatic DDR mutations, but either did not influence DFS. No effect on OS	Kaplan Meier	DFS: 39 months vs. 21 months		DFS Germline + Somatic vs. Nothing -> 0.048 Somatic vs. Nothing -> 0.476 Germline vs. Nothing -> 0.609 OS Germline + Somatic vs. Nothing -> 0.293 Somatic vs. Nothing -> 0.720 Germline vs. Nothing -> 0.318	N
3075	Norquist 2011	Secondary somatic mutations restoring BRCA1/2 predict chemotherapy resistance in hereditary ovarian carcinomas	21709188	Norquist, B	2011	No	Cohort study	Ovarian Cancer	All	Chemotherapy: Platinum-Based	110	No	Genes	BRCA1, BRCA2	Variants	BRCA1 (pathogenic variants), BRCA2 (pathogenic variants)	Predictive: Treatment Resistance	Y	Recurrent treatment-resistance cancers (13/46) are more likely to have secondary mutations restoring BRCA1/2 function vs. treatment responsive cancers (2/64)	Fisher's exact test			<0.003	Y	Predictive: Treatment Resistance	0	NA	0	NA	13	2 only primary, 10 sensitive -> resistant, 2 initially resistant	PFS	0	NA	0	NA	13	27, 8, 24, 11, 6, 12, 52, 8, 24, 28, 28, 17, 25, 38, 22	OS	0	NA	0	NA	13	27, 23, 125 (scensored), 27, 69, 16 (censored), 89, 23, 98, 74 (censored) x 2, 53, 109, 90, 24
1474	Gorodnova 2015	High response rates to neoadjuvant platinum-based therapy in ovarian cancer patients carrying germ-line BRCA mutation	26342406	Gorodnova, TV	2015	No	Cohort study	Ovarian Cancer	All	Chemotherapy: Platinum-Based	25	No	Genes	BRCA1, BRCA2	Loss of Heterozygosity (LOH)	BRCA1 LOH	Predictive: Treatment Response	N						Y	Predictive: Treatment Response	9	SD, SD, PR, SD, CR, PR, SD, SD, SD	0	NA	15	PR, PR, CR, PR, SD, PR, PD, PD, PR, SD, PD, SD, CR, SD, PD
3115	Okada 2012	Loss of heterozygosity at BRCA1 locus is significantly associated with aggressiveness and poor prognosis in breast cancer	22179631	Okada, S	2012	No	Cohort study	Breast Cancer	All	NA	166	No	Genes	BRCA1, BRCA2	Loss of Heterozygosity (LOH)	BRCA1 LOH, BRCA2 LOH	Prognostic: Disease-Free Survival, Overall Survival	Y	Worse survival with LOH	Cox proportional hazards	HR DFS: 3.08, DMFS: 5.18, OS: 4.97	DFS: 1.58-6.18, DMFS: 2.35-12.19, OS: 1.84-15.1	DFS: 0.0009, DMFS: 0.0001, OS: 0.0013	N
7625	Lucas 2013	High prevalence of BRCA1 and BRCA2 germline mutations with loss of heterozygosity in a series of resected pancreatic adenocarcinoma and other neoplastic lesions	23658460	Lucas, AL	2013	No	Cohort study	Pancreatic Cancer	Not Applicable	Chemotherapy	10	No	Genes	BRCA1, BRCA2	Loss of Heterozygosity (LOH)	BRCA1 LOH, BRCA2 LOH, TP53 LOH	Prognostic: Overall Survival	N						Y	Prognostic: Overall Survival	3	3 alive; 0 dead	0	NA	7	5 alive; 2 dead
3502	Rempel 2022	Pan-cancer analysis of genomic scar patterns caused by homologous repair deficiency (HRD)	35681079	Rempel, E	2022	Yes	Cross-sectional study	Ovarian Cancer	Other	Heterogeneous	489	TCGA	Variants/SNPs	BRCA1, BRCA2	Genes	BRCA1, BRCA2	In Silico: Correlation	Y	Strong correlation between germline-based (HRDsum based on SNP array) and somatic-based methods (HRDsum based on whole exome sequencing of tumor) of inferring HRD status	Pearson correlation	R=0.87	NA	NA	N
3940	Sokol 2020	Pan-Cancer Analysis of BRCA1 and BRCA2 Genomic Alterations and Their Association With Genomic Instability as Measured by Genome-Wide Loss of Heterozygosity	32903788	Sokol, ES	2020	Yes	Cross-sectional study	Multi-cancer	Advanced/Metastatic	Heterogeneous	234154	No	Genes	BRCA1, BRCA2	Loss of Heterozygosity (LOH)	BRCA1, BRCA2 LOH	In Silico: Genome-wide LOH	Y	Increased association between biallelic BRCA1/BRCA2 mutation and genome wide LOH	Mann-Whitney U test	Ovary: 4.3 vs. 2.6 Prostate: 3.8 vs. 2.5 Breast: 5.0 vs. 3.5 Endometrial: 4.3 vs. 3.5 Pancreas: 4.3 vs. 1.7 CUP: 5.2 vs. 3.8 Salivary gland: 5.5 vs. 2.6 Gastric/esophageal: 7.0 vs. 3.8 Biliary: 4.3 vs. 2.5 Colorectal: 6.1 vs. 3.8 Neuroendocrine: 7.0 vs. 1.7 Other: 4.2 vs. 1.7	NA	p < 0.05 for 22/23 tumor types (exception is small intestine) for association between biallelic BRCA1/BRCA2 mutation and genome wide LOH; p < 0.001 for 17/23 tumor types; 1.3e-47 1.24e-16 1.38e-30 0.01 5.61e-36 0.04 0.05 3.97e-05 1.37e-05 5.50e-05 4.15e-04 1.17e-06	N
7630	Hodgson 2021	Analysis of mutation status and homologous recombination deficiency in tumors of patients with germline BRCA1 or BRCA2 mutations and metastatic breast cancer: OlympiAD	34500047	Hodgson, D	2021	Yes	Randomized controlled trial	Breast Cancer	Advanced/Metastatic	Targeted Therapy: PARP (Olaparib)	142	No	Genes	BRCA1, BRCA2	Genes; Mutational Signature	BRCA1, BRCA2, HRD score-Myriad	Prognostic: Progression-Free Survival	Y	Longer PFS with HRD score + BRCA1/2 mutation	Forest plot	HRD score <42 and BRCA1m 2/3: 7.4 vs. 6.2 months HRD score <42 and BRCA2m 6/8: 11.2 vs. 5.0 months HRD score ≥42 and BRCA1m 41/50: 6.3 vs. 2.6 months HRD score ≥42 and BRCA2m: 24/29: 8.2 vs. 4.2 months	NA	NA	N
2237	Kraya 2022	PTEN Loss and BRCA1 Promoter Hypermethylation Negatively Predict for Immunogenicity in BRCA-Deficient Ovarian Cancer	35201851	Kraya, AA	2022	Yes	Cohort study	Ovarian Cancer	All	Heterogeneous	108	No	Genes	BRCA1, BRCA2	Genes	BRCA1, BRCA2, PTEN	Prognostic: Overall Survival	Y	BRCA1/2-deficient cancers with homozygous loss of PTEN (c1) with worse overall survival than BRCA1/2 deficient cancers alone (c2)	Cox proportional hazards	HR=4.19	1.27 - 13.83	0.0186	N
2216	Kotoula 2021	Follow-up of tissue genomics in BRCA1/2 carriers who underwent prophylactic surgeries	34304347	Kotoula, V	2021	Yes	Cross-sectional study	Breast Cancer	Early-Stage	Heterogeneous	16	No	Genes	BRCA1, BRCA2	Genes	BRCA1, TP53, CHEK2, JAK2, PTEN	Predictive: Time from Follow-Up, Prognostic: Relapse	N						Y	Predictive: Time from Follow-Up	7	40, 105, 160, 373, 128, 20, 128			9	127, 44, 103, 125, 224, 123, 112, 177, 123	Prognostic: Relapse	7	3 Y, 4 N			9	1 Y, 8 N
2238	Kraya 2019	Genomic Signatures Predict the Immunogenicity of BRCA-Deficient Breast Cancer	30914433	Kraya, A	2019	Yes	Cross-sectional study	Breast Cancer	All	NA	35	TCGA	Genes	BRCA1, BRCA2	Mutational Signature	HRD	In Silico: Immunogenicity	Y	In Silico - Immunogenicity	Student's t-test	NA	NA	p<0.01 for cytolytic index	N
3923	Smith 2019	Endometrial Cancers in BRCA1 or BRCA2 Germline Mutation Carriers: Assessment of Homologous Recombination DNA Repair Defects	32914019	Smith, E	2019	Yes	Cross-sectional study	Uterine Cancer	All	Heterogeneous	13	No	Genes	BRCA1, BRCA2	Loss of Heterozygosity (LOH)	LOH	Clinical: Age at Diagnosis, Stage	N						Y	Clinical: Age at Diagnosis	3	68, 78, 69	0	NA	10	68, 53, 47, 61, 62, 62, 59, 50, 44, 64	Clinical: Stage	3	III, III, III	0	NA	10	III, III, II, IV, III, III, III, I, I, I
2866	Molnár 2021	The Prognostic Relevance of Poly (ADP-Ribose) Polymerase Expression in Ovarian Cancer Tissue of Wild Type and BRCA-Mutation Carrier Patients	33478135	Molnár, S	2021	No	Cross-sectional study	Ovarian Cancer	All	Chemotherapy: Platinum-Based	104	No	Genes	BRCA1, BRCA2	Immunohistochemistry	PARP	Prognostic: Progression-Free Survival, Overall Survival	Y	PFS, OS better when PARP positive/BRCA positive than when PARP positive and BRCA negative, BUT worse than PARP negative, BRCA positive	Kaplan Meier	OR: 2.18 vs. 8.4; OR: 0.20 vs. 0.36	(0.44-10.73) vs. (2.63-26.82); (0.04-1.01) vs. (0.13-1.00)	0.34 to >0.01; 0.05	N
946	Deb 2014	Mutational profiling of familial male breast cancers reveals similarities with luminal A female breast cancer with rare TP53 mutations	25490678	Deb, S	2014	No	Cross-sectional study	Breast Cancer (Male)	Early-Stage	NA	12	No	Genes	BRCA1, BRCA2	Genes	PIK3CA, TP53, PTEN	Clinical: Age at Diagnosis	N						Y	Clinical: Age at Diagnosis	0		7	30.1, 47.1, 50.3, 59.8, 62.7, 65.3, 73.8	5	43.1, 80.1, 58.7, 60.2, 61.1
8506	Saner 2023	Concurrent RB1 loss and BRCA-deficiency predicts enhanced immunological response and long-term survival in tubo-ovarian high-grade serous carcinoma	38837893	Saner, FAM	2024	Yes	Cohort study	Ovarian Cancer	All	Heterogeneous	126	No	Genes	BRCA1, BRCA2	Genes	RB1	Prognostic: Progression-Free Survival, Overall Survival	Y	Among patients with BRCA2-HRD, those with RB1 alterations had longer OS (median 17.0 years) compared with those without RB1 alterations (median 11.7 years). Patients with BRCA1-HRD and RB1 alterations survived longer (median 10.4 years) than those with an intact RB1 gene (median 7.1 years).	Kaplan Meier	NA	NA	<0.0001, =0.0004	N
1975	Jonsson 2019	Tumour lineage shapes BRCA-mediated phenotypes	31292550	Jonsson, P	2019	Yes	Cross-sectional study	Multi-cancer	Advanced/Metastatic	Targeted Therapy: PARP Inhibitors	183	No	Genes	BRCA1, BRCA2	Genes	TMB	Predictive: Duration of Treatment Response	Y	Germline biallelic < somatic biallelic < WT for duration of PARP inhibitor therapy	Kaplan Meier	NA	NA	1.50E-04	N
6292	Liu 2022	Identification of biomarkers of response to preoperative talazoparib monotherapy in treatment naive gBRCA+ breast cancers	35538088	Liu, X	2022	Yes	Non-randomized interventional study	Breast Cancer	Early-Stage	Targeted Therapy: PARP (Talazoparib)	13	No	Genes	BRCA1, BRCA2	Genes	TP53	Predictive: Treatment Response	N						Y	Predictive: Treatment Response	3	RCB II, PCR, RCB-I	0	NA	10	PCR: 4, RCB-1: 1, RCB-2: 3, RCB-3: 2
451	Bruchim 2004	Analyses of p53 expression pattern and BRCA mutations in patients with double primary breast and ovarian cancer	15086724	Bruchim, I	2004	No	Cross-sectional study	Ovarian Cancer	All	Heterogeneous	68	No	Genes	BRCA1, BRCA2	Genes	TP53	Clinical: Stage	N						Y	Clinical: Stage (Breast / Ovarian Cancer)	0	NA	11	Stage 1-2: 2 (28.6%) Stage 3-4: 9 (75%)	15	Stage 1-2: 3 (50%) Stage 3-4: 12 (92.3%)	Clinical: Stage (Ovarian Cancer only)	0	NA	21	Stage 1-2: 5 (50%) Stage 3-4: 16 (76.2%)	21	Stage 1-2: 6 (75%) Stage 3-4: 15 (62.5%)
834	Crook 1998	p53 mutation with frequent novel condons but not a mutator phenotype in BRCA1- and BRCA2-associated breast tumours	9796697	Crook, T	1998	No	Cross-sectional study	Breast Cancer	Not Applicable	NA	77	No	Genes	BRCA1, BRCA2	Genes	TP53	Clinical: Mitoses per HPF	N						Y	Clinical: Mitoses per HPF	30	6, NA, 42, 46, 26, 53, 35, 13, 30, 9, N/D, 1, 0, 12, 23, 1, 61, 33, 32, 7, 110, 160, 45, 19, 4, 46, 91, 44, 28, 36	7	120, 150, 100, 66, ND, 16, 46	40	49, 36, 29, 122, 56, 51, 110, 100, 56, 64, 90, 89, 32, 87, 12, 79, 70, 28, ND, 110, 65, 0, 76, 10, 56, 36, 30, 56, 98, 72, 36, 36, 136, 120, 150, 100, 66, ND, 16, 46
8341	Kim 2023	Mutations of TP53 and genes related to homologous recombination repair in breast cancer with germline BRCA1/2 mutations	36604691	Kim, J	2023	No	Cross-sectional study	Breast Cancer	All	Heterogeneous	28	No	Genes	BRCA1, BRCA2	Genes	TP53	Prognostic: Overall Survival	Y	OS: gBRCA2+ > -TP53, RFS: gBRCA2+ > -TP53	Kaplan Meier	NA	NA	0.011, 0.59	N
2215	Kotoula 2017	The fate of BRCA1-related germline mutations in triple-negative breast tumors	28123851	Kotoula, V	2017	No	Cross-sectional study	Breast Cancer (TNBC)	Early-Stage	Heterogeneous	47	No	Genes	BRCA1, BRCA2	Genes	TP53	Prognostic: Disease-Free Survival	Y	Significant interaction between germline positive / TP53 mutation for increased DFS	Multivariate regression	3.34	0.615-18.125	0.053	N
5889	Huang 2020	Genomic Profiling Comparison of Germline BRCA and Non-BRCA Carriers Reveals CCNE1 Amplification as a Risk Factor for Non-BRCA Carriers in Patients With Triple-Negative Breast Cancer	33194720	Huang, X	2020	Yes	Cohort study	Breast Cancer (TNBC)	Early-Stage	Heterogeneous	75	No	Genes	BRCA1, BRCA2	Genes	TP53, MYC, PIK3CA, PTEN, MCL1, FPUA3, PIMA3, GATA3, FAT3, RB1, EGFR, CCND2, RUNX1, KMT2C, CHD4, MTOR, GRM3, PALB2, CCNE1, IKBKB, FGF6, FGF23, NF1, FGFR3, HSP80AA1, NOTCH1, NOTCH2, B4GALT3, KIAA1549, DUSP6, MSH6, STAT4, WHSC1L1, ARD2, KMT2D, RAD52, NCOR1, EPHA5, RXRA, ARD1A	Predictive: TMB	N						Y	Predictive: TMB	0	NA	54	1 > 20, 3 > 10, 50 0-10	21	1 > 20, 1 > 10, 19 0-10
8654	Zhang 2023	Impact of Homologous Recombination Deficiency on Outcomes in Patients With Triple-Negative Breast Cancer Treated With Carboplatin-Based Neoadjuvant Chemotherapy: Secondary Analysis of the NeoCART Randomized Clinical Trial	36652665	Zhang, L	2023	Yes	Randomized controlled trial	Breast Cancer (TNBC)	Early-Stage	Chemotherapy: Docetaxel/Carboplatin, Epirubicin/Cyclophosphamide/Docetaxel	43	No	Genes	BRCA1, BRCA2	Genes	TP53, PIK3CA PTEN, ATRX, NF1, PIK3R1, PKHD1, BAP1, CCNE1, LRP1B, MYC, PRDM1, RECQL4, TNFAIP3, ALK, APBC, BLM, BRCA2, CHD4, CHD8, CREBBP, DOT1L, DYPD, EGFR, EP300, ERBB2, ERBB3, FGFR1, GATA3, JARID2	Predictive: Pathologic Complete Response	N						Y	Predictive: Pathologic Complete Response	1	1	35	16	7	3
7631	Blum 2022	Determinants of Response to Talazoparib in Patients with HER2-Negative, Germline BRCA1/2-Mutated Breast Cancer	35091441	Blum, J	2022	Yes	Randomized controlled trial	Breast Cancer	Advanced/Metastatic	Heterogeneous	308	No	Genes	BRCA1, BRCA2	Genes	TP53, RAD21, MYC, PTEN, PIK3CA, BRCA1, BRCA2	Prognostic: Progression-Free Survival, Overall Survival	Y	TP53 alterations significantly associated and PTEN borderline associated with talazoparib response; no significant difference in chemotherapy response	Cox proportional hazards	Talazoparib: TP53: 1.693, PTEN: 1.813, PIK3CA: 1.198, RAD21 CAN: 0.634, MYC CAN: 1.323, PTEN CNA: 0.963; Chemotherapy: TP53: 1.439, PTEN: 1.762, PIK3CA: 0.639, RAD21 CNAs: 1.174, MYC CNAs: 1.052	Talazoparib: TP53: 1.186–2.418, PTEN: 0.973-3.378, PIK3CA: 0.697-2.058, RAD21: 0.369-1.088, MYC CNA: 0.852-2.057, PTEN: 0.530-1.750; Chemotherapy: 0.859-2.411, 0.834-3.725, PIK3CA: 0.272-1.499, RAD21 CNA: 0.672-2.049, MYC CAN: 0.586-1.892	Talazoparib: TP53: 0.0033, PTEN: 0.0564, PIK3CA: 0.5119, RAD21 CNA: 0.0940, MYC: 0.2103, PTEN: 0.8992; Chemotherapy: TP53: 0.1614, PTEN: 0.1302, PIK3CA: 0.2962, RAD21 CNA:0.5699, MYC CNA: 0.8634	N
3939	Sohn 2021	Classification of High-Grade Serous Ovarian Carcinoma by Epithelial-to-Mesenchymal Transition Signature and Homologous Recombination Repair Genes	34356119	Sohn, M-H; Kim, SI	2021	No	Cross-sectional study	Ovarian Cancer	All	Heterogeneous	20	No	Genes	BRCA1, BRCA2	Genes; Somatic Copy-Number Alterations	TP53, SCNA	Predictive: TMB; Prognostic: Overall Survival	N						Y	Predictive: TMB	1	1 person without TP53 mutation with low TMB	10	1 very low TMB; 5 low TMB; 4 high TMB	9	1 very low TMB; 5 low TMB; 3 high TMB	Prognostic: Overall Survival	1	1 person without TP53 mutation alive	10	3 dead; 7 alive	9	2 dead; 7 alive
7944	Perry 2022	Divergence of mutational signatures in association with breast cancer subtype	36111610	Perry, G	2022	No	Cross-sectional study	Breast Cancer	All	Chemotherapy	37	No	Genes	BRCA1, BRCA2	Genes	TP53, TTN, HMCB1, APOB, C7, DNAH9, MYH1, PIK3CA, USP6, ADAMTS12, AIM1, ATRX, CACNA1E, CDH1, CSMD3, DNAH3, FBN1, FCGBP, FNDC1, MGA, MMP16, MUC16, OR10X1, PAPPA2, POGZ, PTEN, RBL2, RELN, RYR2, SYNE2, TNRC6B, TRHDE, UTP20, ZFHX4, ZNF532, ZNF717, BRCA1, BRCA2, CDKN2A, CDKN2B, AKT3, CCND1, DDR2, ERBB2, FGFR1, FH, MCL1, MYC, NTRK1, PAK1, RPS6KB1, TSHZ2, ZNF703	Clinical: Subtype, Prognostic: Recurrence	N						Y	Clinical: Subtype, Prognostic: Recurrence	0	NA	24	11 triple negative, 13 hormone positive	13	13 triple negative, 0 hormone positive	Prognostic: Relapse	0	NA	24	4 recurrent, 20 not recurrent	13	6 recurrent, 7 not recurrent
1143	Fan 2021	Distinct Response to Platinum-Based Chemotherapy among Patients with Metastatic Castration-Resistant Prostate Cancer Harboring Alterations in Genes Involved in Homologous Recombination	33904759	Fan, L	2021	No	Cohort study	Prostate Cancer	Advanced/Metastatic	Chemotherapy: Docetaxel, Platinum-Based	23	No	Genes	BRCA1, BRCA2, ATM, ATR, BARD1, CDK12, CHEK2, FANCA, PALB2, RAD51, GEN1, MRE11A, RAD51B, RAD51D	Genes	BRCA1, BRCA2, ATM, ATR, BARD1, CDK12, CHEK2, FANCA, PALB2, RAD51, GEN1, MRE11A, RAD51B, RAD51D	Predictive: Treatment Response (PSA)	N						Y	Predictive: Treatment Response (PSA)	3	3 responses; 0 non-responses	19	8 responses; 11 non-responses	1	1 response; 0 non-response
4741	Yurgelun 2019	Germline cancer susceptibility gene variants, somatic second hits, and survival outcomes in patients with resected pancreatic cancer	29961768	Yurgelun, M	2019	Yes	Cross-sectional study	Pancreatic Cancer	All	Heterogeneous	26	No	Genes	BRCA1, BRCA2, ATM, BRIP1, CHEK2,NBN, PALB2, RAD50, RAD51C, MSH2, MSH6, APC, CDKN2A, TP53	Genes	BRCA1, BRCA2, ATM, BRIP1, CHEK2,NBN, PALB2, RAD50, RAD51C, MSH2, MSH6, APC, CDKN2A, TP53	Clinical: Age at Diagnosis	N						Y	Clinical: Age at Diagnosis	16	75, 29, 71, 66, 67, 80, 61, 68, 86, 78, 77, 53, 72, 77, 46, 65			10	38, 62, 65, 66, 77, 65, 74, 47, 60, 48
8028	Takamatsu 2022	Utility of Homologous Recombination Deficiency Biomarkers Across Cancer Types	35613413	Takamatsu, S	2022	Yes	Cohort study	Multi-cancer	All	Heterogeneous	9399	TCGA	Genes	BRCA1, BRCA2, ATM, BRIP1, FANCM, PALB2, RAD51C	Loss of Heterozygosity (LOH)	LOH	Predictive: HRD, TMB, Signature 3	Y	Patients with LOH showed higher HRD scores and Sig3 ratios, while patients without LOH showed greater TMB	Mann-Whitney U test	NA	NA	HRD score: gBRCA1: P < 1 _ 10_6, gBRCA2: P < 1 _ 10_6, gHRR: P < 1 _ 10_6; Sig3 gBRCA1: P < 1 _ 10_6, gBRCA2: P < 1 _ 10_4, gHRR: P < 0.1; TMB Log10 gBRCA1: 0.017, gBRCA2: 0.014, gHRR: NA	N
8126	Andersen 2023	Non-BRCA1/BRCA2 high-risk familial breast cancers are not associated with a high prevalence of BRCAness	37316882	Anderson, LvB	2023	No	Case series / Description of cases	Breast Cancer	Unknown	NA	27	No	Genes	BRCA1, BRCA2, ATM, CHEK2, FANCD2, HOXB13, MSH6, RAD51D, SLX4, TP53	Genes	BRCA1, BRCA2, PIK3CA, TP53, CDH1	Clinical: Grade, PAM50	N						Y	Clinical: Grade	7	1 grade 1; 3 grade 2; 3 grade 3	11	2 grade 1; 6 grade 2; 3 grade 3	9	0 grade1; 4 grade 2; 5 grade 3	Clinical: PAM50	8	2 LumA 4 LumB 2 Basal	11	7 LumA 1 LumB 2 Basal 1 Her2	11	4 LumA 4 LumB 1 Basal 2 Her2
7632	Chiorean 2021	Randomized Phase II Study of PARP Inhibitor ABT-888 (Veliparib) with Modified FOLFIRI versus FOLFIRI as Second-line Treatment of Metastatic Pancreatic Cancer: SWOG S1513	34580114	Chiorean, EG	2021	Yes	Randomized controlled trial	Pancreatic Cancer	Advanced/Metastatic	Mixed: FOLFIRI vs. FOLIFIRI + PARP	22	No	Genes	BRCA1, BRCA2, ATM, PALB2, CHEK2, FANCM, SLX4, CHK12, ERCC1, MSH6, BLM, ERCC3, ERCC4, RIF1, FANCC	Genes	BRCA1, BRCA2, ATM, PALB2, CHEK2, FANCM, SLX4, CHK12, ERCC1, MSH6, BLM, ERCC3, ERCC4, RIF1, FANCC	Prognostic: Progression-Free Survival, Overall Survival	N						Y	Prognostic: Progression-Free Survival	11	0.8, 7.4, 8.4, 15.8, 2.0, 2.2, 3.9, 9.7, 0.4, 1.7, 8.7	9	7.3, 2, 4.2, 7.2, 8.1, 6.0, 2.0, 9.6, 1.9	2	16.8, 1.8	Prognostic: Overall Survival	11	1.1, 11.9, 16.3, 20.3, 4.6, 4.6, 9.3, 10.7, 1.7, 6.2, 8.7	9	9.4, 3.8, 7.4, 11.9, 22.8, 7.4, 7.5, 17.2, 33.9	2	17.6, 2.1
35	Aguirre 2018	Real-time Genomic Characterization of Advanced Pancreatic Cancer to Enable Precision Medicine	29903880	Aguirre AJ, Nowak JA, Camarda ND, Moffitt RA	2018	Yes	Cohort study	Pancreatic Cancer	Advanced/Metastatic	Heterogeneous	13	No	Genes	BRCA1, BRCA2, CDKN2A, ATM, CHEK2, BLM, FANCA, FANCL, RAD50	Genes; Somatic Copy-Number Alterations	KRAS, TP53, CDKN2A, SMAD4, ARID1A, TGFBR2, TGFBR1, SMAD3, ACVRA, RNF43, APC, STK11, TSC2, RB1, BRAF, GNAS, MYC, ERBB2, GATA6, AKT2, CCNE1, EGFR, MDM2, MET, PAK4, BRCA1, BRCA2, ATM, ATR, CHEK2, PALB2, KDM6A, SMARCA2, SMARCA4, SMARCB1, PBRM1, MLL2, KMT2C	Predictive: COSMIC 3, HRD, Prognostic: Overall Survival	N						Y	Predictive: COSMIC 3, HRD	6	0400209_T1 N 0400235_T1 N 0400215_T1 N 0400214_T1 N 0400164_T1 N 0400192_T1 Y	0	NA	7	0400124_T1 N 0400027_T1 Y 0400067_T1 Y 0400078_T1 Y 0400075_T1 Y 0400242_T1 Y	Prognostic: Overall Survival	6	0400209_T1: Alive (892 days) 0400235_T1: Death (345 days) 0400215_T1: Alive (310 days) 0400214_T1: Alive (245 days) 0400164_T1: Death (294 days) 0400192_T1: Death (82 days)	0	NA	8	0400124_T1 Death (225 days) 0400027_T1 Alive (896 days) 0400067_T1 Death (263 days) 0400078_T1 Death (594 days) 0400075_T1 Alive (625 days) 0400242_T1 Alive (171 days) 0400094_T2 Alive (267 days)
6105	Kotoula 2019	Pathogenic BRCA1 mutations may be necessary but not sufficient for tissue genomic heterogeneity: Deep sequencing data from ovarian cancer patients	30446274	Kotoula, V	2019	Yes	Cross-sectional study	Ovarian Cancer	All	Heterogeneous	42	No	Genes	BRCA1, BRCA2, CHEK2, BLM	Genes; Mutational Signature	HRR, MRR, PIK3CA, ESR12, NAM, RTK, LOH, BRCA1, BRCA2, TP53	Predictive: Treatment Response	N						Y	Predictive: Treatment Response	2	Sensitive x 2	31	Resistant: 10 Super responder: 6 Intermediate: 2 Sensitive: 13	9	Super responder: 1 Intermediate: 5 Sensitive: 3
2429	Li 2019	Germline and somatic mutations of multi-gene panel in Chinese patients with epithelial ovarian cancer: a prospective cohort study	31472684	Li, W	2019	No	Cohort study	Ovarian Cancer	All	Heterogeneous	48	No	Genes	BRCA1, BRCA2, CHEK2, PALB2, RAD51C, STK11	Genes	TP53, PTEN, ATM, BRCA1, BRCA2	Clinical: Age at Diagnosis, Stage	N						Y	Clinical: Age at Diagnosis	6	45 45 42 63 53 64	30	82 41 47 65 48 49 63 46 59 57 48 77 82 52 47 65 51 34 57 52 70 39 41 60 40 68 60 42 55 52	12	55 47 54 66 63 45 56 62 47 58 62 65	Clinical: Stage	6	IIIC IV IV IIIC IIIC IIIC	30	NA IC IIIC IIIC IIIC IC NA IV IIIC IIIC IIIC IIIC IIIC IIIC IIIC IIIB III IC NA NA IVA IIIC IIIC IIIC IIIC III IIB IC IIIC III	12	IIIB IVB IB NA IV IV IIC IIIC IIIC IVB IIIC IIIC
8114	Adamson 2023	Genomic Analyses of Germline and Somatic Variation in High-Grade Serous Ovarian Cancer	37460928	Adamson, AW	2023	Yes	Cross-sectional study	Ovarian Cancer	All	NA	65	No	Genes	BRCA1, BRCA2, CHEK2, PALB2, RRM2B, POLK	Genes	TP53, BRCA1, BRCA2, PTEN, CREBBP, MAP2K4, RB1, CHEK2, HLTF, PALB2, POLK, RRM2B, SLX4	Prognostic: Recurrence-Free Survival, Overall Survival	N						Y	Prognostic: Overall Survival	0	NA	45	28/36 alive 17/29 dead	20	8/36 alive 12/29 died	Prognostic: Recurrence-Free Survival	0	NA	45	9/13 relapse free 36/52 relapsed	20	4/13 relapse free, 16/52 relapsed
8176	Chen 2023	Comprehensive genomic profiling of breast cancers characterizes germline-somatic mutation interactions mediating therapeutic vulnerabilities	38114467	Chen, C	2023	No	Cohort study	Breast Cancer	All	Heterogeneous	4079	No	Genes	BRCA1, BRCA2, CHEK2, PALB2, TP53	Genes	BRCA1, BRCA2, CHEK2, PALB2, TP53	Clinical: Age at Diagnosis, Predictive: Treatment response to platinum, TMB, Ki67, Prognostic: PFS	Y	Patients with BCDG two-hit have younger age at diagnosis, increased TMB, more likelihood of high Ki-67, higher likelihood of ORR w/ platinum, increased PFS	Logistic Regression	Age: 0.95, Ki-67: 1.01	Age: 0.94-0.97, Ki-67: 1.00-1.02	p<0.0001, p=NS, P=0.009, p=0.01	N
8109	Zografos 2022	Multi-Gene Mutation Profiling by Targeted Next-Generation Sequencing in Premenopausal Breast Cancer	36011273	Zografos, E	2022	Yes	Cross-sectional study	Breast Cancer	All	Heterogeneous	24	No	Genes	BRCA1, BRCA2, CHEK2, TP53, RAD51C, RAD51D, BRIP1, MUTYH, PMS2, AKT1, ATM, ROS1, PTEN, PIK3CA	Genes	BRCA1, BRCA2, CHEK2, TP53, RAD51C, RAD51D, BRIP1, MUTYH, PMS2, AKT1, ATM, ROS1, PTEN, PIK3CA	Clinical: Stage, Predictive: Ki67	N						Y	Clinical: Stage	3	IIIC, IIIA, IIB	20	IA, IIB, IIIA, IIIA, IIIA, IA, IIIB, 1A, IV, IIIC, IIA, IIIC, IIB, IIA, IIA, IA, 1A, 1A, IIIA, IV	1	IIIA	Predictive: Ki67	3	>20%, >20%, >20%	20	<20%: 8 >20%: 12	1	>20%
6405	McCartReed 2021	The Genomic Landscape of Lobular Breast Cancer	33919581 and correction in 34439402	McCart Reed, AE	2021	No	Cohort study	Breast Cancer (Lobular)	Early-Stage	Heterogeneous	45	No	Genes	BRCA1, BRCA2, FANCA	Genes	AKT1, BRCA1, CBFB, CBLB, CCND1, CDH1, CDKN1B, CDKN2A, CDKN2B, Chr8:(ZNF703/FGFR1), ERBB2, ERBB3, FOXA1, MAP2K4, MAP3K1, MDM2, MED23, MLL3, MYC, NCOR1, NOTCH2, PIK3CA, PTEN, RHOA, SETD2, SF3B1, SPEN, TBX3, TP53, ZNF217	Clinical: Subtype; Prognostic: Overall Survival	N						Y	Prognostic: Overall Survival	2	1 Alive, 1 Unknown	29	16 Alive 8 no_data_supplied 5 Deceased	8	6 alive, 2 unknown	Clinical: Subtype	2 Luminal	35	28 Luminal 5 Luminal/HER2+ 2 Triple negative	8	7 luminal, 1 triple negative
8629	Yang 2023	A novel marker integrating multiple genetic alterations better predicts platinum sensitivity in ovarian cancer than HRD score	37732324	Yang, F	2023	Yes	Cross-sectional study	Ovarian Cancer	All	Heterogeneous	44	TCGA	Genes	BRCA1, BRCA2, FANCE, CDK12, RAD51C, RAD51D, ATM, CHEK2, FAN1	Genes	TP53, FAT3, RYR2, MAP2, ATM, ASCC3, CDH11, DNAH10, DYNC1H1, ERCC6, PTEN, RIF1, POLD2, PRKDC, SMARC4A, TDG, TTK, YWHAE	Predictive: Treatment Resistance	N						Y	Predictive: Treatment Resistance	6	5 Platinum sensitive, 1 Platinum resistant			38	31 platinum sensitive, 7 platinum resistant
4699	Yi 2019	Germline TP53 and MSH6 mutations implicated in sporadic triple-negative breast cancer (TNBC): a preliminary study	30630526	Yi, D	2019	No	Cross-sectional study	Breast Cancer (TNBC)	Early-Stage	Heterogeneous	68	No	Genes	BRCA1, BRCA2, NBN, FANCC, BRIP1, PALB2, ATM, TP53, NF1, CHEK2, MLH1, PMS1, MSH2, MSH6, POLE, BMPR1A	Genes	BRCA1, BRCA2, RAD51D, RAD50, RAD51C, NBN, FANCC, BRIP1, BARD1, PALB2, CDKN2A, ATM, TP53, APC, NF1, PTEN, CHEK2, STK11, MLH1, PMS2, PMS1, MSH2, MSH6, MUTYH, EPCAM, CDH1, POLE, BMPR1A, POLD1, SMAD4, GREM1	Clinical: Stage; Prognostic: Progression-Free Survival	N						Y	Clinical: Stage	7	1 stage 1; 5 stage 2; 1 stage 3	45	1 unknown; 14 stage 1; 23 stage 2; 7 stage 3	16	12 stage 2; 4 stage 3	Prognostic: Progression-Free Survival	7	6 PFS; 1 relapse	45	6 dead; 35 PFS; 4 relapse without death	16	1 dead; 14 PFS; 1 relapse without death
7614	Zong 2022	Comprehensive Analysis of Somatic Reversion Mutations in Homologous Recombination Repair (HRR) Genes in A Large Cohort of Chinese Pan-cancer Patients	35281878	Zong, H; Zhang, J; Xu, Z	2022	No	Cross-sectional study	Multi-cancer	Advanced/Metastatic	Targeted Therapy: PARP inhibitors, platinum-based chemotherapy	628	No	Genes	BRCA1, BRCA2, PALB2	Variants	BRCA1 (c.3710_3711dup p.P1238fs; c.3109_3111del p.Q1037del; c.3109_3111delinsTAC p.Q1037Y; c.3109_3110delinsTC p.Q1037S; c.3109C>G p.Q1037E; c.3430_3450del p.Q1144_P1150del), PALB2 (c.2469_2492del p.C824_L831del; c.2466del p.Q822fs; c.2450_2465del p.T817fs; c.2457del p.E820fs; c.2339del p.G780fs; c.2322_2325del p.K774fs; c.2313del p.S771fs; c.2298_2301del p.C768fs), BRCA2 (c.8450G>C p.C2817S; c.8…	Clinical: Cancer Type	N						Y	Clinical: Cancer Type	617	BRCA1: -Lung cancer: 28 -Breast cancer: 22 -Ovarian cancer: 56 -Pancreatic cancer: 2 BRCA2: -Lung cancer: 74 -Breast cancer: 36 -Ovarian cancer: 22 -Pancreatic cancer: 7 PALB2: -Lung cancer: 22 -Breast cancer: 13 -Ovarian cancer: 0 -Pancreatic cancer: 1 HRR Germline / Other: -Lung cancer: 188 -Breast cancer: 23 -Ovarian cancer: 13 -Pancreatic cancer: 5	0	NA	11	BRCA1: -Lung cancer: 0 -Breast cancer: 4 -Ovarian cancer: 3 -Pancreatic cancer: 0 BRCA2: -Lung cancer: 1 -Breast cancer: 3 -Ovarian cancer: 0 -Pancreatic cancer: 1 PALB2: -Lung cancer: 0 -Breast cancer: 1 -Ovarian cancer: 0 -Pancreatic cancer: 0 HRR Germline / Other: 0
6560	Ng 2021	Characterisation of PALB2 tumours through whole-exome and whole-transcriptomic analyses	33893315	Ng, P	2021	No	Cross-sectional study	Breast Cancer	Other	NA	39	No	Genes	BRCA1, BRCA2, PALB2	Genes	TP53, PIK3CA, GATA3, MAP3K1, KMT2C, PTEN, CBFB, NF1, ARID1A, RB1, MYH8, USP9X, NOTCH1, ERBB3, ATM, PARP12, CDH8, GATA12, KMT2A, MLH3, PPP2R2B, STAT2, PALB2, BRCA1, BRCA2	In Silico: TPM, Clinical: Subtype	Y	TPM of biallelic < monoallelic or noncarrier	Mann-Whitney U test	NA	NA	p_=_0.0171, 0.0002 and 0.0015 for PALB2, BRCA1 and BRCA2 respectively	Y	Clinical: Subtype (PAM50)	10	Basalx3, HER2x2, Luminal Ax2, Luminal B, Normalx2	12	Luminal B x 4, Luminal A x 2, HER2, Basal x 4, NA	17	Basal x 10, Luminal B x 4, Luminal A x 2, NA
3987	Staaf 2019	Whole-genome sequencing of triple-negative breast cancers in a population-based clinical study	31570822	Staaf, J; Glodzik, D	2019	No	Cross-sectional study	Breast Cancer (TNBC)	Not Applicable	Heterogeneous	46	No	Genes	BRCA1, BRCA2, PALB2	Genes	TP53, PIK3CA, PTEN, RB1, CDKN2A, MYC, MCL1, EGFR, CCNE1, TERC	Predictive: HRD; Prognostic: Overall Survival	N						Y	Predictive: HRD	1	0.996,	34	0.999867295669837 0.999959910781476 0.99998882157149 0.999995579794463 0.0571534753990386 0.999982566018913 0.999799878090786 0.999995293689094 0.999991979621081 0.999996095666759 0.0028154250988985 0.999968230833219 0.999968207172689 0.99906195075735 0.999607483923125 0.0323502534404866 0.711022746717939 0.312763555167331 0.99999419571729 0.99999482603683 0.999980601665207 0.999538054987543 0.09…	11	5.86301369863014 4.30684931506849 3.00547945205479 2.97534246575342 2.90684931506849 5.04657534246575 4.05753424657534 3.98356164383562 4.04931506849315 4.3972602739726 3.93972602739726	Prognostic: Overall Survival	1	00:00:03.300000	34	6.96712328767123 6.81643835616438 6.87945205479452 6.77534246575342 6.45205479452055 1.64383561643836 6.01643835616438 6.06849315068493 2.24657534246575 5.82465753424658 4.28219178082192 3.5972602739726 3.48219178082192 3.53972602739726 3.60821917808219 3.38356164383562 2.73424657534247 5.75890410958904 5.20547945205479 4.40547945205479 4.38356164383562 4.69041095890411 4.36712328767123 4.3041095…	11	0.999987303421561 0.999939245170017 0.999991237365335 0.999993908759052 0.999988413843971 0.997597007698142 0.992331727009698 0.999898785033976 0.999960018811512 0.999964201267193 0.999903360628014
1441	Golan 2021	Genomic Features and Classification of Homologous Recombination Deficient Pancreatic Ductal Adenocarcinoma	33524400	Golan, T; O'Kane, GM; Denroche, RE	2021	Yes	Cross-sectional study	Pancreatic Cancer	Advanced/Metastatic	Chemotherapy: Platinum-Based	49	No	Genes	BRCA1, BRCA2, PALB2	Genes	BRCA1, BRCA2, PALB2	Prognostic: Overall Survival	Y	Biallelic gene inactivation (HRD) >> OS vs. monoallelic germline carriers of BRCA1/2	Cox proportional hazards	23.3 months vs. 7.9 months; HR: 2.13	0.88-5.16	0.1	N
7634	Dhawan 2017	Differential Toxicity in Patients with and without DNA Repair Mutations: Phase I Study of Carboplatin and Talazoparib in Advanced Solid Tumors	28790114	Dhawan, MS	2017	No	Non-randomized interventional study	Multi-cancer	Advanced/Metastatic	Mixed: Carboplatin, Talazoparib	14	No	Genes	BRCA1, BRCA2, PALB2, ATM, ATR, FANCC, RAD51C, BRIP1, BARD1, MRE11A	Genes	BRCA1, BRCA2, PALB2, ATM, ATR, FANCC, RAD51C, BRIP1, BARD1, MRE11A	Predictive: Objective Response Rate	N						Y	Predictive: Objective Response Rate	8	CR, PR, PR, CSD, CSD, SD, SD, PD	3	1 SD, 2 PD	3	CSD, PD, PD
557	Carreira 2021	Biomarkers Associating with PARP Inhibitor Benefit in Prostate Cancer in the TOPARP-B Trial	34045297	Carreira, S.	2021	Yes	Randomized controlled trial	Prostate Cancer	Advanced/Metastatic	Targeted Therapy: PARP (Olaparib)	52	No	Genes	BRCA1, BRCA2, PALB2, ATM, CDK12	Genes	BRCA1, BRCA2, PALB2, ATM, CDK12	Prognostic: Progression-Free Survival	Y	Homozygous BRCA2 deletion (n=11) vs. germline mutations (n=13) vs. BRCA1/2 somatic mutations only (n=8)	Descriptive	rPFS: 16.4 months vs. 5.6 months vs. 8.2 months; OS: 22.2 months vs. 14.7 months. vs. 14.6 months	NA	NA	Y	Clinical: Duration of Response to Treatment	BRCA = 5, PALB2 = 2	BRCA = 6,6,6,5,5 months, PALB 2 = 3,0 months	BRCA = 19; PALB2 = 1	BRCA = 39,30,24,21,18,18,16,15,13,11,10,9,8,7,6,6,5,3,1 months, PALB2 = 3	BRCA = 8, PALB2 = 4	BRCA = 23,11,9,9, 6,6,2,2 months, PALB2; 27,18,9,3 months
3219	Park 2020	Genomic Methods Identify Homologous Recombination Deficiency in Pancreas Adenocarcinoma and Optimize Treatment Selection	32444418	Park, W	2020	Yes	Cross-sectional study	Pancreatic Cancer	Advanced/Metastatic	Heterogeneous	50	No	Genes	BRCA1, BRCA2, PALB2, ATM, CHEK2, BARD1, BLM, RAD50, RAD51C	Genes	KRAS, TP53, CDKN2A, SMAD4, ARID1A, RNF43, RB1, GNAS	Predictive: TMB	N						Y	Predictive: TMB	2	1,7	10	8, 5, 5, >8, 6, 7, 4, 5, 5, 7	38	7, >8, 4, 7, > 8, 8, 5, 4, 2, 2, 7, 6, 6, 5, 3, >8, 6, 7, 8, 5, 2, 4, 1, 6, >8, 5, 6, 4, 3, 8, 3, 3, 4, 5
8052	Waks 2022	Somatic and Germline Genomic Alterations in Very Young Women with Breast Cancer	35101884	Waks, AG	2022	Yes	Cohort study	Breast Cancer	Early-Stage	Heterogeneous	93	No	Genes	BRCA1, BRCA2, PALB2, BUB1B, TP53, COL7A1, GJB2, PRSS1	Genes	TP53, GATA3, ARID1A, PIK3CA, SLC22A2	Prognostic: Relapse	N						Y	Prognostic: Relapse	11		71	9 recurrences	11	3 recurrence
3422	Qing 2021	Diverse immune response of DNA damage repair-deficient tumors	34095878	Qing, T	2021	Yes	Cross-sectional study	Multi-cancer	All	Heterogeneous	9738	TCGA	Genes	BRCA1, BRCA2, PALB2, MLH1, MSH2, MSH3, MSH6, PMS2, ATM, ATR, CHEK2, POLE, POLQ	Genes	BRCA1, BRCA2, PALB2, MLH1, MSH2, MSH3, MSH6, PMS2, ATM, ATR, CHEK2, POLE, POLQ	Predictive: TMB	Y	Germline variants + somatic mutations -> TMB within specific cancer types: BRCA-BRCA1, UCEC-MSH6, OV-BRCA2, STAD-PALB2, UCEC-ATM, UCEC-MSH6, UCEC-MSH3, UCEC-ATR, UCEC-MSH2, UCEC-POLE, UCEC-POLQ, BRCA-ATR, STAD-MLH1, UCEC-BRCA2, UCEC-MLH1, BRCA-BRCA1, STAD-BRCA2, BLCA-ERCC2, UCEC-PMS2, KIRP-MSH2. UCEC-CHEK2, BRCA-ATM, UCEC-BRCA1, PRAD-BRCA2, SKCM-ATM, SKCM-ATR, COADREAD-MLH1, SKCM-MLH1	Partial least squares path modeling	(Betas) Germline: 1.221843931 3.459009802 0.625392879 1.577655667 Somatic: 2.529486378 3.603421257 3.388384847 3.374863696 3.513847028 4.242378714 4.129167605 2.944139365 3.078118003 2.073682783 2.591381296 1.062708763 1.878032227 1.113473215 2.60975394 1.433607209 1.630587693 0.857920608 2.1552803 1.175712536 1.097940132 1.198034866 1.125068044 2.01714228	NA	Germline: 0.00010781 0.002155755 0.003405539 0.032011053 Somatic: 6.78E-15 2.00E-12 1.01E-11 1.44E-09 2.49E-07 3.44E-07 1.04E-06 1.75E-06 1.53E-05 0.000156771 0.000643403 0.000685404 0.002022969 0.002022969 0.003178442 0.008895474 0.017389749 0.018092506 0.018214998 0.025173971 0.025173971 0.025173971 0.025173971 0.027163611	N
1582	Hagio 2021	Impact of clinical targeted sequencing on endocrine responsiveness in estrogen receptor-positive, HER2-negative metastatic breast cancer	33854152	Hagio, K	2021	No	Cross-sectional study	Breast Cancer	Advanced/Metastatic	Heterogeneous	24	No	Genes	BRCA1, BRCA2, PTEN	Genes	TP53, PIK3CA, BRCA1, TERT, DICER1, TSC1, STK11, CEBPA, ESR1, MAP2K4, MYC, CDK4, ECT2L, TNFAIP3, FAM46C, NRAS, AKT1, BRAF, ATM, GNAS, CRLF2, SMO, RB1, CREBBP, NF1, ERBB2, CDKN2A, ARID1A, BRCA2, CSF1R, FANCA, SF3B1, KIT, ROS1, FLT3, HIST1H3B, ASXL1, DDR2, PRKAR1A, BRIP1, CD79B, HIST1H3B, PRKAR1A, DAXX, KLF6	Clinical: Stage, Predictive: Treatment Response; Prognostic: Overall Survival	N						Y	Prognostic: Overall Survival	1	20	20	33, 12, 42, >269, 46, 71, --, 187, 78, 71, >188, >159, --, 126, >49, --, --, >204, >205, 361	3	57, 107, 114	Predictive: Treatment Response	1	1 secondary endocrine resistance	20	6 primary endocrine resistance, 5 secondary resistance, 9 endocrine responsive	3	1 primary endocrine resistance, 2 secondary endocrine resistance	Clinical: Stage	1	Stage IV	20	1 stage I, 9 stage II, 5 stage III, 3 stage IV, 2 NA	3	2 stage II, 1 stage III
1339	Garsed 2018	Homologous Recombination DNA Repair Pathway Disruption and Retinoblastoma Protein Loss Are Associated with Exceptional Survival in High-Grade Serous Ovarian Cancer	29061645	Garsed, DW	2018	Yes	Cohort study	Ovarian Cancer	All	Chemotherapy: Platinum-Based	137	No	Genes	BRCA1, BRCA2, RAD51C, BRIP1	Genes	RB1	Predictive: Exceptional Responders	Y	More exceptional responders with RB1 gene loss	Kaplan Meier	NA	NA	0.03	N
8155	Burdett 2023	Multiomic analysis of homologous recombination-deficient end-stage high-grade serous ovarian cancer	36849657	Burdett, NL	2023	Yes	Cohort study	Ovarian Cancer	All	Heterogeneous	14	No	Genes	BRCA1, BRCA2, RAD51C, RAD51D, PALB2, BRIP1	Genes	TP53, PIK3CA, HLTF, POLQ, PIK3CB, MET, ARID1B, NF1, MRE11A, CCNE1, RB1, PTEN, TP53BP1. APC, ERBB2, CDK12, PALB2	Predictive: TMB	N						Y	Predictive: TMB	0	NA	4	TMB of approximately 4, 6, 10, 6	10	TMB of approximately 4,8, 10, > 12, 6, 8, 4, 10, 10, 8,
7635	Yap 2020	Phase I Trial of the PARP Inhibitor Olaparib and AKT Inhibitor Capivasertib in Patients with BRCA1/2- and Non-BRCA1/2-Mutant Cancers.	32532747	Yap, T	2020	Yes	Non-randomized interventional study	Multi-cancer	Advanced/Metastatic	Targeted Therapy: PARP (Olaparib, Capivasertib)	22	No	Genes	BRCA1, BRCA2, RAD51D, PALB2, ERCC2, NTRK1	Genes	PIK3CA, TP53, RAD51D, ARID1A, BRCA1/2, PALB2, TSC1, PTEN, KRAS, SMARCA4, AR, NF1, NTRK1, CDKN1B	Predictive: Treatment Response, Duration of Treatment	N						Y	Predictive: Treatment Response	0	NA	5	SD x 2, cPR x 3	17	cPR, cPR, SD, cPR, cPR, uPR, cPR, SD, SD, cPR, uPR, SD, SD, SD, SD, SD, cPR	Predictive: Duration of Treatment	0	NA	5	36, 27, 31, 83, 18	17	81, 39, 18, 51, 66, 15, 29, 18, 24, 33, 115, 18, 56, 11, 18, 98, 21
6453	Min 2020	Homologous repair deficiency score for identifying breast cancers with defective DNA damage response	32719318	Min, A; Kim, K	2020	Yes	Cross-sectional study	Breast Cancer	All	Heterogeneous	92	TCGA	Genes	BRCA1, BRCA2, TP53, POLQ, BRIP1	Genes	DDR Gene List	Clinical: Subtype, Predictive: HRD	N						Y	Predictive: HRD	9	70, 70, 70, 70, 60, 60, 60, 70, 70	29	75 x 6, 70 x 17, 60 x 5	54		Clinical: Subtype	9	Basal-like, Basal-like, Luminal A, Luminal A, Normal like, Luminal B , Luminal B, Basal, HER2	29	Basal x 19, Her2, Normal, Luminal B x 5, Luminal A x 3	54
8488	Ring 2023	Olaparib and Ceralasertib (AZD6738) in Patients with Triple-Negative Advanced Breast Cancer: Results from Cohort E of the plasmaMATCH Trial (CRUK/15/010)	37773077	Ring, A	2023	Yes	Non-randomized interventional study	Breast Cancer	Advanced/Metastatic	Targeted Therapy: PARP (Olaparib, Ceralasertib)	18	No	Mutational Signature	BRCA1, HRR	Genes; Mutational Signature	BRCA1, HRR	Predictive: Treatment Response	N						Y	Predictive: Treatment Response	9	4 confirmed response, 2 unconfirmed response, 3 no response	7	1 confirmed response, 6 no response	2	1 unconfirmed response, 1 no response
5585	Fountzilas 2016	Disease evolution and heterogeneity in bilateral breast cancer	27904775	Fountzilas, E	2016	No	Cross-sectional study	Breast Cancer	Early-Stage	Heterogeneous	11	No	Genes	BRCA1, TP53	Genes	ADAMTS16, AKT1, APOBEC3B, ARID1A, ARID1B, BRCA2, CCND1, CDH1, CDKN2A, EGFR, ERBB2, ESR1, FGFR1, FGFR2, FGFR3, FOXM1, GATA3, IGFBP4, KRAS, LAP3, MAP2K4, MAP3K1, MET, MKS1, MLL3, MRM1, MYC, NCOR1, NOTCH1, NOTCH4, PALB2, PIK3CA, PTEN, RB1, TBX3, TP53, VEGFA, ZNF703	Clinical: Age at Diagnosis	N						Y	Clinical: Age at Diagnosis	5	39 38.5 39.3 37.1 35.6	2	48.9 33.2	4	30 46.7 37.1 36.4	Clinical: "Disease Present"	5	metachronous concurrent metachronous concurrent metachronous	2	concurrent metachronous	4	concurrent metachronous metachronous metachronous
3069	Nones 2019	Whole-genome sequencing reveals clinically relevant insights into the aetiology of familial breast cancers	31090900	Nones, K	2019	No	Cross-sectional study	Breast Cancer	Unknown	NA	68	No	Genes	BRCA1, TUSC3, PADI3, SERPINA1, GPR101,MUTYH, OGG1, CECR1, CYP24A1, TYR, BRCA2, C7orf10, ASB10, ESPN, HBD, PLG, ATM, TP53	Genes	BRCA1, BRCA2	Predictive: HRD	N						Y	Predictive: HRD	1	1 < 0.7;	21	14 < 0.7, 7 >0.99	46	46 > 0.99
8391	Lozano 2023	Impact of concurrent tumour events on the prostate cancer outcomes of germline BRCA2 mutation carriers	36972661	Lozano, R	2023	Yes	Cohort study	Prostate Cancer	All	Heterogeneous	198	No	Genes	BRCA2	Genes	RB1	Prognostic: Disease-Specific Survival	Y	BRCA2-RB1 co-deletion vs. neither (and > gBRCA2 or RB1 deletion)	Multivariate regression	4.01	1.42-11.34	0.009	N
7627	Safonov 2022	Abstract GS4-08: Comprehensive genomic profiling of patients with breast cancer identifies germline-somatic interactions mediating therapy resistance	NA	Safonov, A	2022	Yes	Cross-sectional study	Breast Cancer	All	Targeted Therapy: CDK4/6 Inhibitors	26	No	Genes	BRCA2	Genes	RB1	Prognostic: Progression-Free Survival	Y	Inferior PFS in CDK4/6 with BRCA2 / RB1 (18/26 with both)	Kaplan Meier	HR: 2.17	95% CI: 1.46-3.22	p<0.0001	N
5387	deBono 2021	TALAPRO-1 final data: Talazoparib (TALA) monotherapy in men with DNA damage response alterations (DDRalt) and metastatic castration-resistant prostate cancer (mCRPC): Exploration of DDRalt germline/somatic origin and zygosity	NA	de Bono, JS	2021	Yes	Non-randomized interventional study	Prostate Cancer	Advanced/Metastatic	Targeted Therapy: PARP (Talazoparib)	52	No	Genes	BRCA2, ATM	Genes	BRCA2, ATM	Predictive: Objective Response Rate	Y	25.9% (7/27) ORR in pts with tDDRalt of germline origin and 9.1% (2/22) ORR in pts with only somatic tDDRalt	Fisher's exact test	NA	NA	0.159	N
2717	Mateo 2015	DNA-Repair Defects and Olaparib in Metastatic Prostate Cancer	26510020	Mateo, J	2015	Yes	Non-randomized interventional study	Prostate Cancer	Advanced/Metastatic	Targeted Therapy: PARP (Olaparib)	49	No	Genes	BRCA2, ATM	Genes	BRCA2, ATM, FANCA, CHEK2, BRCA1, PALB2, HDAC2, RAD51, MLH3, ERCC3, MRE11, NBN	Predictive: Duration of Treatment Response	N						Y	Predictive: Duration of Treatment Response	0	NA	43	24, 48, 44, 40, 73, 16, 19, 39, 62, 40, 12, 12, 24, 8, 8, 24, 8, 7, 11, 13, 12, 1, 12, 7, 12, 4, 12, 12, 22, 13, 4, 12, 17, 4, 12, 11, 12, 12, 9, 12, 12, 1, 12	6	36, 36, 48, 57, 58, 11
365	Biswas 2019	Lymph node metastasis in oral cancer is strongly associated with chromosomal instability and DNA repair defects	30924133	Biswas, N	2019	No	Cohort study	Head and Neck Cancer	Advanced/Metastatic	NA	72	No	Genes	BRCA2, FAT1	Genes	TP53, FAT1, CASP8, NOTCH1, PIK3CA, ARID2, HRAS, UPS9X, C1, RBBP8, ATM, RAD51C, H2AFX, TP53BP1, CHEK1, RAD54L, BLM, NHEJ, TP53	Prognostic: Metastasis	N						Y	Prognostic: Metastasis	0	NA	45	12 died, 3 died for other causes, 30 alive	27	16 died of cancer, 10 alive, 1 died of something else
8666	AlAssaad 2024	Whole-Genome Sequencing Analysis of Male Breast Cancer Unveils Novel Structural Events and Potential Therapeutic Targets	38369186	Al Assaad, M	2024	Yes	Case series / Description of cases	Breast Cancer (Male)	Early-Stage	Heterogeneous	10	No	Genes	BRCA2, HOXB13	Genes	FGFR1, SMARCA4, FAT1, ZFP36L1, PTPRS,GATA3, RNF213, RUNX1, RECQL4, SDHA, PIK3CA, SMC3, ARID2, PIK3C0, LRP6, ESR1, CAMTA1, SPOP, WNK2, TNC, MTOR, CUX1, KAT6A, RAD21, RPTOR, ERCC3, SMAD2, HDAC4, BRCA2, PDS5B, SUFU, FLCN, TERT, HOXB13, POT1, POLE, FANCA, BRAF, RBM10, CLTCL1, NOTCH3, BCL11A, ATXN7, KMT2A, DDX5, NTRK1, REV3L, VAV1, AGO1	Clinical: Stage, Predictive: TMB	N						Y	Clinical: Stage, Predictive: TMB	0	NA	6	ypT2N1a, pT1aN1a, pT2N0, pT2N1, pT1bN0, pT1cN0	4	pT1cN1a, pT1cN1, pT4bN1, pT2N0	Predictive: TMB	0	NA	6	12, 10, 15, 10, 30, 10	4	8, 5, 20, 27
2036	Karzai 2018	Activity of durvalumab plus olaparib in metastatic castration-resistant prostate cancer in men with and without DNA damage repair mutations	30514390	Karzai, F	2018	No	Non-randomized interventional study	Prostate Cancer	Advanced/Metastatic	Mixed: Durvalumab, Olaparib	17	No	Genes	BRCA2, NBN	Genes	BRCA2, PMS2, CHEK2, FANCA, TP53, AR, ARID1B, BRAF, HRAS, KCNH2, PIK3CA, PLEKHG5, RB1	Predictive: Objective Response Rate	N						Y	Predictive: Objective Response Rate	2	1 PR, 1 NA	12	1 PR, 1 PR, 1 SD, 1 SD, 1 SD, 1 SD, 1 NA, 1 SD, 1 SD, 1 SD, 1 NA, 1 SD	3	1 PR, 1 NA, 1 PD
8706	Kahn 2024	Pathogenic germline variants in non-BRCA1/2 homologous recombination genes in ovarian cancer: Analysis of tumor phenotype and survival	38041901	Kahn, RM	2024	Yes	Cross-sectional study	Ovarian Cancer	All	Heterogeneous	704	No	Genes	BRIP1, PALB2, RAD51B, RAD51C, RAD51D	Genes	BRCA1, BRCA2, BRIP1, PALB2, RAD51B, RAD51C, RAD51D	Prognostic: Progression-Free Survival, Overall Survival	Y	PFS improved with gBRCA1/2 vs. LOH-low	Kaplan Meier	NA	NA	Not significant	N
3166	Pabst 2008	Somatic CEBPA mutations are a frequent second event in families with germline CEBPA mutations and familial acute myeloid leukemia	18768433	Pabst, T	2008	No	Cross-sectional study	Hematologic Malignancies	Other	Heterogeneous	13	No	Genes	CEBPA	Genes	CEBPA	Clinical: Age at Diagnosis, Subtype	N						Y	Clinical: Age at Diagnosis	5	46, 10, 18, 34, 4	0	NA	8	40, 42, 27, 30, 25, 24, 39, 26	Clinical: Subtype	5	M2, M1, M2Eo, NA, M1	0	NA	8	M1, M1, M2, M2Eo, M4Eo, M1, M2, M2Eo
4162	Tawana 2015	Disease evolution and outcomes in familial AML with germline CEBPA mutations	26162409	Tawana, K	2015	No	Cross-sectional study	Hematologic Malignancies	Other	Heterogeneous	131	No	Genes	CEBPA	Genes	CEBPA, SMC3, NRAS, CSF3R, TET2, EZH2, DDX41, EPPK1, MAP2	Prognostic: Overall Survival	Y	29% spontaneous single CEPBA somatic mutation vs. 67% familial surviving at 7 years	Kaplan Meier	NA	NA	P=0.003	N
1341	Gasior-Perczak 2019	Coexisting Germline CHEK2 and Somatic BRAF(V600E) Mutations in Papillary Thyroid Cancer and Their Association with Clinicopathological Features and Disease Course	31703344	Gasior-Perczak, D	2019	No	Cross-sectional study	Papillary Thyroid	All	NA	427	No	Genes	CHEK2	Variants	BRAF (V600E)	Predictive: Treatment Response	Y	BRAF + CHEK2 mutation => not significantly different with treatment response	Chi-squared test	NA	NA	0.457 (BRAF V600E + CHEK2 variant vs. BRAF V600E alone)	N
8758	Schwartz 2024	Clinicopathologic and genetic analysis of invasive breast carcinomas in women with germline CHEK2 variants	38091153	Schwartz, CJ	2024	No	Cross-sectional study	Breast Cancer	Unknown	NA	24	No	Genes	CHEK2	Genes	CHEK2, ATM, PALB2, RAD50, PIK3CA, AKT1, MAP3K1, GATA3, CCND1, FGFR1, FGFR2, GPR124, ZNF703, ZNF217, ERBB2, GAB2, PPM1D, TP53, MDM2, MSH6, CDH1, KMt2C, PTPN1	Clinical: Subtype	N						Y	Clinical: Subtype	4	4 ductal	0	ND	20	16 ductal, 2 papillary, 2 lobular	Clinical: Subtype	4	3 Luminal A; 1 Luminal B	0	ND	15	4 Luminal A, 10 luminal B, 1 HER2 (5 no data)
1887	Iyevleva 2022	Somatic loss of the remaining allele occurs approximately in half of CHEK2-driven breast cancers and is accompanied by a border-line increase of chromosomal instability	35020107	Iyevleva, AG	2022	No	Cohort study	Breast Cancer	Unknown	NA	25	No	Genes	CHEK2	Genes	PIK3CA, TP53, GATA3, NF1, MAP3K1, PTEN, RUNX1, NCOR1, IGF1R, XPC, PIK3R1, RBM10, POSTN, SYK, CDH1, KRAS, MAP2K4	Predictive: HRD	Y	HRD score higher when LOH instead of ROH	Mann-Whitney U test	NA	NA	<0.01	Y	Predictive: HRD	0	NA	11	1 >= 42; 10 < 42	9	9 < 42	Signature 3 dominant or not	0		11	1 yes; 10 no(t dominant)	10	10 no(t dominant)
3161	Ow 2014	Identification of two poorly prognosed ovarian carcinoma subtypes associated with CHEK2 germ-line mutation and non-CHEK2 somatic mutation gene signatures	24879340	Ow, GS	2014	No	Cohort study	Ovarian Cancer	All	Heterogeneous	22	TCGA	Genes	CHEK2, RPS6KA2, MLL4, BRCA1, BRA2	Genes	CHEK2, RPS6KA2, MLL4, BRCA1, BRCA2	Prognostic: Overall Survival	N						Y	Prognostic: Overall Survival	2	Died, Died	0	NA	20	3 living, 17 died	Tumor stage	2	III, III	0	NA	20	1 stage II, 14 stage III, 5 stage IV
2362	Lee 2018	Exploring the feasibility and utility of exome-scale tumour sequencing in a clinical setting	29607586	Lee, B	2018	No	Case series / Description of cases	Multi-cancer	Advanced/Metastatic	Heterogeneous	15	No	Genes	CHEK2, TSC1, TSC2, BRCA1, BRCA2, ERCC4, FANCC, NSD1, XRCC2, VHL, SLX4, RHBDF2, RB1, FGFR4, HNF1A, MSH6, RHBF2, FGFR4, DYPD, APC, WRN, FANCI, CTNNB1, PMS2, MSH6, MSH2	Genes	EGFR2, CTNNB1, IL18R1, SUV420H1, KRAS, TP53, BCORL1, MYO1A, TGFBR1, UBD, UBE2A, BRAF, NRAS, IDH1, JAK2, ALK, SMAD4, MED12, ERBB2, ANK51B, SCRIB, GRM5, POLG	Prognostic: Relapse	N						Y	Prognostic: Relapse	4	N: 4	3	Y: 1, N: 2	8	Y: 7, N: 1
2804	Michels 2021	Minimal residual disease, long-term outcome, and IKZF1 deletions in children and adolescents with Down syndrome and acute lymphocytic leukaemia: a matched cohort study	34560013	Michels, N	2021	Yes	Cohort study	Hematologic Malignancies	Not Applicable	Chemotherapy: Induction, Consolidation	117	No	Chromosomal Regions	Chr21 (Loss)	Genes	IKZF1 deletion	Prognostic: Relapse	Y	Increased risk of relapse with Down syndrome AND IKZF1 deletion vs. Down syndrome alone	Cox proportional hazards	4.3	1.6-11.0	<0.0028	N
1434	Goetz 2008	Cytochrome P450 2D6 and homeobox 13/interleukin-17B receptor: combining inherited and tumor gene markers for prediction of tamoxifen resistance	18794098	Goetz, MP	2008	Yes	Cohort study	Breast Cancer	Early-Stage	Hormone Therapy: Tamoxifen (5 years)	110	No	Genes	CYP2D6	Genes	HOXB13, IL17BR	Prognostic: Disease-Free Survival, Overall Survival	Y	HOXB13/IL17BR high and decreased CYP2D6 metabolism is associated with worse survival	Log-rank test	DFS = 3.10, OS: 3.15	DFS = 1.34-7.17, OS: 1.17-8.52	0.008, 0.024	N
1484	Goyal 2021	Clinical and Pathologic Spectrum of DDX41-Mutated Hematolymphoid Neoplasms	33929502	Goyal, T	2021	No	Cohort study	Lymphoid Neoplasms	Not Applicable	Heterogeneous	20	No	Genes	DDX41	Genes	DDX41	Clinical: Diagnosis	N						Y	Clinical: Diagnosis	11	4 AML, 4 MDS, 1 CMML-1 plus CLL, 1 CML, 1PMF	1	1 MM	8	4 AML, 1 MDS, 1 AML, 1 LGL, 1 CCUS
2421	Li 2022	AML with germline DDX41 variants is a clinicopathologically distinct entity with an indolent clinical course and favorable outcome	34671111	Li, P	2022	No	Cross-sectional study	Hematologic Malignancies	Unknown	Heterogeneous	25	No	Genes	DDX41	Genes	DDX41	Predictive: Treatment Response, Prognostic: Overall Survival	N						Y	Predictive: Treatment Response	0	NA	11	9CR; 2 PR	13	10 CR; 1 PR 2 PD	Prognostic: Overall Survival	0	NA	12	11 alive 1 dead	13	12 alive; 1 dead
7856	Li 2022	The genetic landscape of germline DDX41 variants predisposing to myeloid neoplasms	35671390	Li, P	2022	No	Cross-sectional study	Hematologic Malignancies	Other	NA	205	No	Genes	DDX41	Genes	DDX41, ASXL1, PFH6, CUX1, SF3B1, JAK2, TP53, KMT2A, BCORL1, DNMT3A, RUNX1, NF1	Prognostic: Overall Survival	Y	Overall survival - Germline DDX41 with abnormal cytogenetics / somatic DDX41 change	Univariate regression	HR (Abnormal cytogenetics): 0.82 HR: No s.DDX41: 1.71	0.04-5.66 0.22-10.49	Not significant	N
3429	Quesada 2019	DDX41 mutations in myeloid neoplasms are associated with male gender, TP53 mutations and high-risk disease	30963592	Quesada, A	2019	No	Cross-sectional study	Myeloid Neoplasms	Other	Heterogeneous	34	No	Genes	DDX41	Genes	DDX41, TP53	Clinical: Age at Diagnosis, Diagnosis, Prognostic: Overall Survival	N						Y	Prognostic: Overall Survival	2	Alive, Alive	0	NA	32	Alive x 24, Dead x 8	Clinical: Age at Diagnosis	2	74, NA	0	NA	32	73, 60, 69, 45, 48, 68, 74, 84, 72, 62, 63, 78, 76, 66, 79, 79, 68, 63, 72, 65, 66, 68, 72, 73, 70, 65, 78, 62, 76, 81, NA, NA	Clinical: Diagnosis	2	CMML, Post PV-MF	0	NA	32	AML x 20, MDS x 10, MPN x 2
8402	Makishima 2023	Germline DDX41 mutations define a unique subtype of myeloid neoplasms	36322930	Makishima, H	2023	Yes	Cohort study	Myeloid Neoplasms	Other	NA	977	No	Variants/SNPs	DDX41	Genes	TP53	Prognostic: Overall Survival	Y	DDX41 mutated, TP53 mutated has better overall survival than TP53 mutated, but similar to DDX41 alone	Kaplan Meier	NA	NA	1.20E-02	N
8423	Molteni 2023	Prevalence and clinical expression of germ line predisposition to myeloid neoplasms in adults with marrow hypocellularity	37216690	Molteni, E	2023	Yes	Cross-sectional study	Myeloid Neoplasms	Other	NA	15	No	Genes	DDX41, ELANE, FANCA, GATA2, RUNX1	Genes	DDX41, SF3B1, ASXL1, STAG2, EZH2, TET2	Clinical: MDS Subtype	N						Y	Clinical: MDS Subtype	8	MLDx3, EB2x4, MPN-U	0	NA	7	MLD x2, EB2 x3, MLD, EB-1
908	deKock 2014	Pituitary blastoma: a pathognomonic feature of germ-line DICER1 mutations	24839956	de Kock, L	2014	No	Case series / Description of cases	Pituitary blastoma	Other	NA	11	No	Genes	DICER1	Genes	DICER1	Prognostic: Overall Survival	N						Y	Prognostic: Overall Survival	2	2 alive	2	1 alive; 1 dead	7	5 alive; 2 dead
4737	Yuan 2020	Clinical Characteristics and Mutation Analyses of Ovarian Sertoli-Leydig Cell Tumors	32557933	Yuan, Z	2020	No	Cross-sectional study	Sertoli-Leydig cell tumors	Early-Stage	NA	11	No	Genes	DICER1, PMS2, FOXL2, PALB2	Genes	DICER1, BCL11A, FGFR1, PABPC1, NOTCH4, MUC16, MUC4, QKI, ATF1, FOXL2	Prognostic: Relapse	N						Y	Prognostic: Relapse	1	Relapse, DFS 7 months, died 9 months	5	NED x 5	5	NED x 3, Relapse x 2
6258	Lin 2021	Identification of the Unique Clinical and Genetic Features of Chinese Lung Cancer Patients With EGFR Germline Mutations in a Large-Scale Retrospective Study	34869019	Lin, X	2021	Yes	Cross-sectional study	Lung Cancer	Advanced/Metastatic	Targeted Therapy: EGFR Inhibitors	19	No	Genes	EGFR	Genes	EGFR	Predictive: Treatment Response	N						Y	Predictive: Treatment Response	2	Yes (1 month, 14 months)	0	NA	17	Yes (18 months, 2 months, 6 months, 3 months, 7+18 months, 17+2 months, 10 months, 16+25 months, 17 months, 8 months, 15 months, 5 months, 2 months, 1 month, 14 months), No (14 months, 2 months, 9 months, 20 months, 3 months), NA (3 months)
6574	Nie 2011	CYP1A1*2A polymorphism as a predictor of clinical outcome in advanced lung cancer patients treated with EGFR-TKI and its combined effects with EGFR intron 1 (CA)n polymorphism	21616658	Nie, Q	2011	No	Cohort study	Lung Cancer	Advanced/Metastatic	Targeted Therapy: EGFR Inhibitors	115	No	Variants/SNPs	EGFR (Intron 1 p.R497P), CYP1A1 variants	Genes	EGFR	Prognostic: Overall Survival	Y	Given CYP1A1 and EGFR intron 1 somatic polymorphism, better overall survival	Cox proportional hazards	1.992 (germline + somatic) vs. 2.364 (germline only)	1.182-3.358 (g+s) vs. 1.535-3.639 (germline only)	0.010 (g+s) vs. 0.000 (germline only)	N
1201	Fishbein 2017	Comprehensive Molecular Characterization of Pheochromocytoma and Paraganglioma	28162975	Fishbein, L	2017	Yes	Cross-sectional study	Pheochromocytoma / Paraganglioma	All	NA	10	TCGA	Genes	EGLN1, MAX, NF1, RET, SDHB, SDHD, TMEM127, VHL	Genes	HRAS, RET, EPAS1, NF1, CSDE1, BRAF, VHL, FGFR1, ATRX, ARNT, SETD2, TP53, IDH1	Prognostic: Metastasis	N						Y	Prognostic: Metastasis	3	SDHB = 3	3	HRAS = 1, SETD2 = 1, ATRX = 1	2	SDHB + ATRX, SDHB + ATRX + SETD2	Prognostic: "Clinically Aggressive Disease"	4	SDHB = 4	4	HRAS = 1, SETD2 = 1, ATRX = 1, EPAS1 = 1	2	SDHB + ATRX, SDHB + ATRX + SETD2
2478	Liu 2016	Fc-Œ≥ Receptor Polymorphisms, Cetuximab Therapy, and Survival in the NCIC CTG CO.17 Trial of Colorectal Cancer	27179112	Liu, G	2016	Yes	Randomized controlled trial	Colon Cancer	Advanced/Metastatic	Targeted Therapy: Cetuximab	37	No	Variants/SNPs	FCGR2A (rs1801274), FCGR3A (rs396991)	Genes	KRAS	Prognostic: Progression-Free Survival, Overall Survival	Y	Worse survival with g+s than either alone	Cox proportional hazards	1.14, 1.07	0.7-1.9, 0.7-7	0.05, 0.90	N
379	Blenman 2022	Predictive Markers of Response to Neoadjuvant Durvalumab with Nab-Paclitaxel and Dose-Dense Doxorubicin/Cyclophosphamide in Basal-Like Triple-Negative Breast Cancer	35377948	Blenman, KRM	2022	Yes	Non-randomized interventional study	Breast Cancer (TNBC)	Early-Stage	Immunotherapy	57	No	Genes	FGFR4, ISX, RGPD3, PABPC1, KMT2C, BRCA1, CRLF2, LRP1B, TSC2, ZFHX3, FKBP3, IRF4, APC, CACNA1D, MEN1, MSI2, OMD, PAX3, PAX7, POLQ, PRF1, RUNX1, SDHB, SDHD, SETD1B, TCF7L2	Genes	TP53, MUC4, PDE4DIP, KMT2C, NOTCH2, AR, BRCA1, COL1A1, FANCD2, NF1, PIK3CA, ZFHX3, ARID1B, ATM, EPHA3, ETV5, KMT2D, PTEN, PTPRB, SETDB1, UBR5	Prognostic: Pathologic Complete Response	N						Y	Prognostic: Pathologic Complete Response	1	N=1	2	Y=2	54	N=30, Y=24
7153	Sun 2021	Integrated Molecular Characterization of Fumarate Hydratase-deficient Renal Cell Carcinoma	33414138	Sun, G	2021	No	Case series / Description of cases	Renal Cell Cancer	All	Heterogeneous	25	No	Genes	FH	Other	730 Gene Panel	Clinical: Age at Diagnosis	N						Y	Clinical: Age at Diagnosis	3	30, 38, 48	8	27, 38, 50, 36, 35, 50, 57, 35	14	13, 47, 56, 52, 42, 20, 36, 28, 31, 45, 51, 45, 37, 55	Prognostic: Metastasis	3	(1) Lymph nodes(thoracic and abdominal), multiple bones(L1-L3,L5, ilium, sacrum),lung,liver; (2) Lymph nodes(retroperitoneal), (3) Lymph node (renal hilar, para-aorta, pelvic and neck), pelvic cavity, bone (skull,C4-7,T1-2, ilium)	8	(1) Primary surgical region, interior and posterior sides of lumbar maximus, para-aorta; (2) Lymph nodes(para-aorta) (3) Multiple bones (axial skeleton, ilium, pubis), Lymph nodes(para-aorta) (4) Lymph nodes(inferior vena cava, iliaca vessel),liver,Axial skeleton(L2) (5) Multiple abdominal metastases, liver (6) Lymph node(axilla) (7) Bone(theracolumbar vertebra, rib,ilium, pubis, sarcrum) (8) No …	14	(1) No metastasis (2) Lymph node (renal hilar), colon, primary surgical region,lung (3) Lymph nodes (renal hilar, para-aorta, para-vena cava) (4) Multiple bones,liver,spleen (5) Lymph nodes(hilar, para-aorta),Multiple Bones(femur, bilateral ilium) (6) Multiple Bones (ilium, femoral head, ribs, T1), Adrenal gland, Lymph nodes(axillary, abdominal aorta and mesentery around, inferior vena cava) (7) …
8626	Xu 2023	Genomic Profiling and Response to Immune Checkpoint Inhibition plus Tyrosine Kinase Inhibition in FH-Deficient Renal Cell Carcinoma	35715365	Xu, Y	2023	No	Cross-sectional study	Renal Cell Cancer	All	Heterogeneous	57	No	Genes	FH	Genes	FH, PIK3CA, CDC27, NSD2, VHL, STAG2, CDK4, TGFBR2, ACVR1B, HOXA11, ATM, PRKDC, MLH3, MSH6, CDH1, NF2, NCOR2, FBXW7, NOTCH2, TP53, CHEK1, CHEK2, PLK2, CDKN2A, PTEN, ITGA8, MET, FGFR4, JAK2, TSC1, TSC2, FGFR2, KDR, NRAS, APC, ABL2, ARGHEF6, KRAS, CD19, TCF7L2, AXIN1	Clinical: Stage	N						Y	Clinical: Stage (T stage < 2b or >= 2b, N stage 0 or 1)	0	NA	5	3 < 2b 2 >= 2b	52	29 < 2b 23 >=2b	Clinical: Stage (N = 0 or 1)	0	NA	5	2 N0 3 N1	52	31 N0 21 N1	Clinical: Stage (M=0 or 1)	0	NA	5	3 M0 2 M1	52	36 M0 11 M1
4540	West 2014	Acquired ASXL1 mutations are common in patients with inherited GATA2 mutations and correlate with myeloid transformation	24077845	West, R	2014	No	Cross-sectional study	Myeloid Neoplasms	Other	Heterogeneous	47	No	Genes	GATA2	Genes	ASXL1	Clinical: Hematology Syndrome Diagnosis	N						Y	Clinical: Hematology Syndrome Diagnosis			33	MSD/AML: 1, Emberger: 1; MDS = 26, CMML: 1, monocytopenia: 2, laryngeal cancer: 1, low b-cells: 1, MDS/Emberger: 1	14	CMML: 4, MDS: 10
8360	Largeaud 2023	Somatic genetic alterations predict hematological progression in GATA2 deficiency	36727400	Largeaud, L	2023	No	Cross-sectional study	Hematologic Malignancies	Other	NA	62	No	Genes	GATA2	Genes; Chromosomal Regions	Chr 7 (mono), Chr 8 (tri), Del(1;7), STAG2, ASXL1, SETBP1, EZH2, GATA2, RUNX1, BCOR, BCORL1, CEBPA, ETV6, JAK2, GATA1, KMT2D, SMC3, RAD21, SMC1A, CBL, NRAS, KRAS, PTPN11, MYC, IZKF1, TYK2, KIT, NF1, WT1	Prognostic: Overall Survival	N						Y	Prognostic: Overall Survival	17	16: Alive, 1: Not alive	0	NA	45	17: Dead, 28: Alive
723	Churpek 2015	Genomic analysis of germ line and somatic variants in familial myelodysplasia/acute myeloid leukemia	26492932	Churpek, JE	2015	No	Cross-sectional study	Myeloid Neoplasms	Unknown	NA	26	No	Genes	GATA2, RUNX1, SBDS, FANCA	Genes	SHROOM2, TUBA3C, HYDIN, STAG2, EZH2, CNTN5, RUNX1, HNRNPK, GATA2, DLC1, WT1, TYK2, NPM1, KIF2B, CACNA1G, SPEG, ATP2B3, PTPN11, NAV1, ABTB1, ADAM11, PTPN11, BCOR, OR8B12, FLG, ETV6, BSN, FREM2	Predictive: TMB	Y	If you have germline + somatic => fewer somatic mutations overall, also qualitatively higher VAF => AML (but no stats)	Wilcoxon rank-sum test	NA	NA	0.013	N
3359	Polprasert 2019	Frequent germline mutations of HAVCR2 in sporadic subcutaneous panniculitis-like T-cell lymphoma	30792187	Polprasert ,C	2019	No	Cross-sectional study	Cutaneous T-cell Lymphoma	Other	Heterogeneous	12	No	Genes	HAVCR2	Other	TCR	Predictive: Objective Response Rate	N						Y	Predictive: Objective Response Rate	1	CR	1	Relapse	10	7 relapse, 2 CR, 1 PR
7990	Scott 2022	Sex-specific differences in immunogenomic features of response to immune checkpoint blockade	35992816	Scott, S	2022	No	Cross-sectional study	Lung Cancer	All	Immunotherapy	89	No	Other	HLA II	Other	IMM load	Prognostic: Overall Survival	Y	Combined high tumor IMM-II loads and high germline HLA II diversity was associated with significantly longer OS	Kaplan Meier	NA	NA	0.02	N
8612	Wen 2023	Specific human leukocyte antigen class I genotypes predict prognosis in resected pancreatic adenocarcinoma: a retrospective cohort study	37026827	Wen, C	2023	No	Cohort study	Pancreatic Cancer	Early-Stage	s/p Surgery	226	No	Genes	HLA-A02, HLA-B62, HLA-B44	Genes	KRAS, TP53	Prognostic: Disease-Free Survival	Y	HLA genotype was a risk factor for worse DFS when driver mutations in model	Cox proportional hazards	1.54	0.99-2.54	0.054	N
631	Chang 2017	Targeted next-generation sequencing identified novel mutations in triple-negative myeloproliferative neoplasms	28389907	Chang, Y-C	2017	No	Cross-sectional study	Myeloid Neoplasms	Not Applicable	NA	13	No	Genes	KMT2C, MPL, SYNE1, SETD2, ATM, KMT2D, TNFAIP3	Genes	KMT2C, IRS2, MPL, SYNE3, PDE4DIP, SETD2, ATM, KMT2D, TNFAIP3, CCND2, FGFR2, FGFR3, MLH1, RET, JAK2, KIT, BCL9, EGFR, CDH1, MN1, PIK3CG, NFE2L2, UGT1A1, ASXL1, RUNX1, WT1	Clinical: Hematology Syndrome Diagnosis	N						Y	Clinical: Hematology Syndrome Diagnosis	1	PV-1/7	6	ET-5/5, PV-1/7	6	PV-5, PMF-1
7433	Winder 2009	Association of a germ-line variant in the K-ras 3' untranslated region with response and progression-free survival in patients with mCRC treated with single-agent cetuximab (IMCL-0144) or in combination with cetuximab (EPIC) independent of K-ras mutation status	NA	Winder, T	2009	Yes	Non-randomized interventional study	Colon Cancer	Advanced/Metastatic	Targeted Therapy: Cetuximab	130	No	Variants/SNPs	KRAS (LCS 6 SNP)	Genes	KRAS	Predictive: Treatment Response	Y	Tumor response: 42% partial response (G germline genotype) >> 9% partial response (TT germline genotype) BUT only in WT patients, reversed with somatic KRAS mutation	Fisher's exact test	NA	NA	0.02	N
2588	Ma 2020	Identification of germline and somatic mutations in pancreatic adenosquamous carcinoma using whole exome sequencing	31958074	Ma, H	2020	No	Cross-sectional study	Pancreatic Cancer	Early-Stage	Heterogeneous	12	No	Genes	MAP3K1, PDE4DIP, BCR, ALK, USP6, AR, HLA-A, SPEN, KMT2D, NUTM2B, ZFHX3, MN1	Genes	TP53, KRAS, HRNR, OBSCN	Prognostic: Metastasis, Overall Survival	N						Y	Prognostic: Overall Survival	4	1 alive, 3 dead	0	NA	8	4 alive, 4 dead	Prognostic: Metastasis	4	1 no metastasis; 3 yes metastasis	0	NA	8	3 no metastasis; 5 yes metastasis
1569	Hacker 2010	The association between MC1R genotype and BRAF mutation status in cutaneous melanoma: findings from an Australian population	19571821	Hacker, E	2010	No	Cohort study	Melanoma	Other	Heterogeneous	123	No	Genes	MC1R	Variants	BRAF (V600E)	Clinical: Lesions	Y	MC1R variant + BRAF V600E -> Fewer Lesions vs. MC1R WT	Chi-squared test	0.72	0.28-1.82	Not significant	N
7628	Thomas 2017	Associations of MC1R Genotype and Patient Phenotypes with BRAF and NRAS Mutations in Melanoma	28842324	Thomas, N	2017	No	Cohort study	Melanoma	Not Applicable	NA	1044	No	Genes	MC1R	Genes	BRAF, NRAS	Prognostic: Cancer	Y	Not likely to get melanoma with germline / somatic variants	Multivariate regression	MC1R + BRAF:0 89; MC1R + NRAS: 1.08	0.59-1.34; 0.63-1.85	0.58, 0.79	N
4563	Wilmott 2019	Whole genome sequencing of melanomas in adolescent and young adults reveals distinct mutation landscapes and the potential role of germline variants in disease susceptibility	30178487	Wilmott, JS	2019	Yes	Cohort study	Melanoma	All	NA	25	No	Genes	MC1R, RAD50, ATM, POT1, RPA3, TP53BP1, POLE, ERCC2, WRN, PMS2, MITF, LIG4, FANCD2, FANCM, ERCC4, LIG3, XRCC5, CDKN2A, RAD52, RFC4, REV3L, FANCE, PMS1, FANCA	Other	WGS	Clinical: Stage, Prognostic: Overall Survival	N						Y	Prognostic: Overall Survival	0	NA	10	5 alive; 5 dead	15	7 alive; 8 dead	Clinical: Stage	0	NA	10	4 stage I; 4 stage II; 2 stage III	14	8 stage I; 2 stage 2; 2 stage III; 2 stage IV
4413	Vivenza 2012	MDM2 309 polymorphism predicts outcome in platinum-treated locally advanced head and neck cancer	22356895	Vivenza, D	2012	No	Cross-sectional study	Head and Neck Cancer	All	Chemotherapy: Platinum-Based	140	No	Variants/SNPs	MDM2 (309), TP53 (Arg72Pro)	Genes; Immunohistochemistry	TP53, EGFR	Prognostic: 5-Year Survival	Y	Mutant TP53 Pro/Pro SNP is beneficial, EGFR variant not relevant associated with 5-year survival	Multivariate regression	0.24, 1.44	0.054, 0.275	0.171	N
1792	Huang 2009	Combined effects of MDM2 SNP 309 and p53 mutation on oral squamous cell carcinomas associated with areca quid chewing	18487080	Huang, S	2009	No	Cross-sectional study	Head and Neck Cancer	All	NA	102	No	Variants/SNPs	MDM2 (rs2279744)	Genes	TP53	Prognostic: Disease-Free Survival, Metastasis	Y	Worse DFS with T variant and TP53 mutation	Kaplan Meier	1.31 with T variant and TP53 mutation, 2.54 with GG/no TP53, 4.57 with GG/TP53	0.47-3.66 with T variant and TP53 mutation, 0.51-14.03 with GG/no TP53, 0.78-34.49 with GG/TP53	0.04 and 0.05	N
239	Bartel 2008	Both germ line and somatic genetics of the p53 pathway affect ovarian cancer incidence and survival	18172257	Bartel, F	2008	No	Cross-sectional study	Ovarian Cancer	All	Heterogeneous	103	No	Variants/SNPs	MDM2 (SNP 309)	Genes	TP53	Prognostic: Overall Survival	Y	Pro/Pro alleles of the Arg72Pro SNP were correlated with a 6.4-fold increased risk of tumor-related death (P = 0.032) in a multivariate Cox regression that was adjusted for FIGO stage and residual disease (AND INCLUDED somatic TP53 MUTATION STATUS)	Multivariate Cox regression	1.693	0.769-3.728 6.452 (1.072-6.452)	0.032	N
4331	vandenBroek 2011	Association of the germline TP53 R72P and MDM2 SNP309 variants with breast cancer survival in specific breast tumor subgroups	21667122	van den Broek, A	2011	Yes	Cohort study	Breast Cancer	Not Applicable	Heterogeneous	295	No	Variants/SNPs	MDM2 (SNP 309), TP53 (Arg72Pro)	Genes; Expression Signatures	TP53, PTEN	Prognostic: Breast Cancer-Specific Survival	Y	Worse breast-cancer specific survival with germline variants (TP53 R72P and MDM2 SNP309) and TP53 somatic variant	Cox proportional hazards	TP53 R72P GC (Het): 1.74; MDM2 SNP309 GG (Homo): 2.99	0.83-3.65 0.95-9.39	0.14 0.061	N
2374	Lee 2019	High prevalence of the MLH1 V384D germline mutation in patients with HER2-positive luminal B breast cancer	31358837	Lee, S	2019	No	Cross-sectional study	Breast Cancer	All	Heterogeneous	79	No	Variants/SNPs	MLH1 (V384D)	Genes	TP53, CHEK2, MSH6, MET, BRCA2, PIK3CA, TSC2, ERBB4, ALK, ATM, POLE, JAK2, MSH2, CDKN2A, NTRK1, STK11, KIT, ERBB3, RUNX1, MLH1, APC, ERCC2, CDH1, HRAS, DDR2, CREBBP, FLCN	Clinical: Stage	N						Y	Clinical: Stage	3	IIB IIA IA	67	IIIa IIIa IIIa IA IIA IIB IA IA IIA IA IA IA IA IIB IA IIIA IA IA IIA IIA IIA IIB IIA IIA IIA IA IA IIIa IA IIA IIIc IIB IA IIB IA IIIc IA IA IIB IIIa IV IIIa IIA IA IIA IIIa IIB IA IIB IIA IA IIB IA IIIc IIIa IA IIA IIB IIA IIIa IIIA IIA IIB IIA IIIA IIIA IA	9	IIA IIB IA IIA IIA IA IA IIB IIB
4770	Zhang 2006	Gene conversion is a frequent mechanism of inactivation of the wild-type allele in cancers from MLH1/MSH2 deletion carriers	16423994	Zhang, J	2006	No	Case series / Description of cases	Colon Cancer	Early-Stage	Heterogeneous	13	No	Genes	MLH1, MSH2	Genes	MLH1, MSH2	Predictive: MSI	N						Y	Predictive: MSI	7	6 MSI high; 1 MSI low	0	NA	6	5 MSI high, 1 MSI low
6766	Porkka 2020	Does breast carcinoma belong to the Lynch syndrome tumor spectrum? - Somatic mutational profiles vs. ovarian and colorectal carcinomas	32292574	Porkka, N	2020	No	Case series / Description of cases	Breast Cancer	Other	Heterogeneous	20	No	Genes	MLH1, MSH2, MSH6	Genes	MLH1, MSH2, MSH6	Predictive: MSI, TMB	N						Y	Predictive: MSI	5 cases	2 insufficient, 3 sufficient	0	NA	15	6/11 for germline + LOH 2/9 for germline + LOH (pMMR) 4/11 for germline + point mutation, 3/9 for germline + somatic point mutaton (pMMR)	Predictive: TMB	5 cases	2 high TMB, 3 low TMB	0	NA	15	12 cases high TMB, 3 cases low TMB
8220	Elze 2023	Microsatellite instability in noncolorectal and nonendometrial malignancies in patients with Lynch syndrome	37018159	Elze, L	2023	Yes	Cross-sectional study	Multi-cancer	All	Heterogeneous	236	No	Genes	MLH1, MSH2, MSH6, EPCAM	Genes	MLH1, MSH2, MSH6, EPCAM	Clinical: Age at Diagnosis, Stage, Tumor Site	N						Y	Clinical: Age at Diagnosis	127	1 30-34 5 35-39 7 40-44 9 45-49 14 50-54 22 55-59 18 60-64 20 65-69 15 70-74 8 75-79 7 80-84 1 85-89	0	NA	109	2 30-34 3 35-39 6 40-44 8 45-49 20 50-54 17 55-59 13 60-64 15 65-69 14 70-74 7 75-79 3 80-84 1 85-89	Clinical: Tumor Site	127	2 Lymphoma 3 ampulla of vater 14 bladder 1 bone marrow 24 breast 5 esophagus 1 head and neck 10 kidney 1 liver 2 lung 1 mediastinum 7 melanoma 4 ovary 2 pancreas 1 peritoneum 14 prostate 3 renal pelvis 1 rib 3 sarcoma 8 small bowel 12 stomach 2 testis 1 thyroid 5 ureter	0	NA	109	2 ampulla of vater 20 bladder 3 brain 12 breast 2 esophagus 2 head and neck 1 kidney 1 liver 1 lung 9 ovary 2 pancreas 1 peritoneum 4 prostate 10 renal pelvis 20 small bowel 4 stomach 1 testis 13 ureter 1 urethra	Clinical: Stage	100	5 pT1 13 pT1a 5 pT1aN0 1 pT1b 3 pT1bN0 6 pT1c 1 pT1c2 7 pT1cN0 3 pT1cN1 8 pT2 1 pT2N0 1 pT2N2 1 pT2a 1 pT2a/bN0 2 pT2b 1 pT2bN0 3 pT2c 2 pT3 4 pT3N0 4 pT3N1 1 pT3N2 3 pT3a 2 pT3aN0 1 pT3bN0M1 2 pT4N0 1 pT4N1 1 pT4a 1 pT4aN0 1 pT4bN0 14 pTa 1 unknown	0	NA	91	3 WHO IV 9 pT1 1 pT1N0 5 pT1a 2 pT1aN0 1 pT1b 2 pT1c 1 pT1c2 1 pT1cN0 10 pT2 2 pT2N0 4 pT2N1 1 pT2aN0 1 pT2b 8 pT3 4 pT3N0 5 pT3N1 1 pT3N2 1 pT3aN1 1 pT3b 1 pT3bN0 1 pT4N1 1 pT4N2 1 pT4N4 1 pT4aN0 1 pT4bN0 1 pT4cN1 18 pTa 1 pTa/pT1 2 unknown
129	Antonarakis 2019	Clinical Features and Therapeutic Outcomes in Men with Advanced Prostate Cancer and DNA Mismatch Repair Gene Mutations	30337059	Antonarakis, ES	2019	Yes	Case series / Description of cases	Prostate Cancer	Advanced/Metastatic	Heterogeneous	13	No	Genes	MLH1, MSH2, MSH6, PMS2	Genes	AKT1, CTNNB1, TMPRSS2-ERG fusion, TP53, PMS2, JAK1, RET, RNF43, BRCA1, BRCA2, HRAS, JAK2, PTEN, MSH6, ATM, ERCC4, ERCC5, FANCM	Clinical: Gleason Score, Stage	N						Y	Clinical: Gleason Score	2	7, 9	10	9, 7, 10, 9, 9, 9, N/A, 9, 9, 9	1	8	Clinical: Stage	2	T3bN0, N/A	10	T3aN0, T3bN1, N/A, N/A, T3bN0, T3aN0, N/A, N/A, T3aN0	1	N/A	PFS	2	N/A, N/A	10	#8, #9, and #10 achieved an objective soft-tissue response lasting for 3‚Äì9+ months on pembrolizumab; others not reported individually (N/A)	1	N/A
8777	Weijers 2024	Molecular analysis of cancer genomes in children with Lynch syndrome: Exploring causal associations	38175816	Weijers, D	2024	No	Case series / Description of cases	Multi-cancer	Not Applicable	NA	18	No	Genes	MLH1, MSH2, MSH6, PMS2	Genes	MLH1, MSH2, MSH6, PMS2	Predictive: TMB, SBS	N						Y	Predictive: TMB	11	0.4, 0.2, 0.3, 0.6, 2.2, 1.2, 0.7, 0.4, 0.8, 0.2, 0.9, 1.6,	0	NA	7	15, 17.1, 14.8, 52.5, 15.3, 2.7, 11.5	Predictive: SBS	11	1 x None	0	NA	7	SBS26/SBS6; SBS26; SBS21/SBS15; SBS6; SBS1/SBS16; SBS15; SBS1
8591	Walker 2023	DNA Mismatch Repair Gene Variant Classification: Evaluating the Utility of Somatic Mutations and Mismatch Repair Deficient Colonic Crypts and Endometrial Glands	37894291	Walker, R	2023	No	Cross-sectional study	Colon Cancer	Not Applicable	NA	54	No	Genes	MLH1, MSH2, MSH6, PMS2	Loss of Heterozygosity (LOH)	MLH1, MSH2, MSH6, PMS2 (LOH)	Predictive: MSI	N						Y	Predictive: MSI	13	1 dMMR crypt present	24	0 dMMR crypt presents	17	2 dMMR crypt present
8785	Yang 2024	Microsatellite Instability and Mismatch Repair Deficiency Define a Distinct Subset of Lung Cancers Characterized by Smoking Exposure, High Tumor Mutational Burden, and Recurrent Somatic MLH1 Inactivation	37838086	Yang, S-R	2024	Yes	Cross-sectional study	Lung Cancer	All	Heterogeneous	26	No	Genes	MLH1, MSH2, MSH6, PMS2	Genes; Mutational Signature	MMR Signature, MLH1, PMS2, MSH2, MSH6, EGFR, KRAS, ERBB2, TP53, RB1, KEAP1, PTEN, B2M, JAK1, STK11	Predictive: Clinical Benefit Rate, Prognostic: Metastasis	N						Y	Prognostic: Metastasis	0	NA	20	17 advanced stage, 3 not	6	4 advanced stage, 2 not	Predictive: Clinical Benefit Rate	0	NA	9	4 responders, 5 non-responders	1	1 responder, 0 non-responders
127	Antelo 2012	A high degree of LINE-1 hypomethylation is a unique feature of early-onset colorectal cancer	23049789	Antelo, M	2012	No	Case-Control	Colon Cancer	All	NA	27	No	Genes	MLH1, MSH2, MSH6, PMS2	Variants; Methylation	MLH1 (LINE-1 methylation), BRAF (V600E)	Clinical: Stage	N						Y	Clinical: Stage	19	II: 10 III: 7 IV: 2	1	III - 1	7	I - 2 II - 1 III - 4
464	Buckley 2018	Exome-wide analysis of bi-allelic alterations identifies a Lynch phenotype in The Cancer Genome Atlas	30217226	Buckley, AR	2018	No	Cohort study	Multi-cancer	All	Heterogeneous	4997	TCGA	Genes	MLH1, MSH2, MSH6, PMS2, MSH5	Genes	MLH1, MSH2, MSH6, PMS2, MSH5	Clinical: Age of Diagnosis, Predictive: MSI	Y	Germline-somatic with earlier age, higher somatic MSI	Linear model	2.8fold higher somatic MSI, 14 years earlier with germline-somatic		3.95e-15 (p-value) for germline:somatic; 0.0041 for younger age of diagnosis	N
2438	Liao 2021	Prevalence and spectrum of germline cancer susceptibility gene variants and somatic second hits in colorectal cancer	34873480	Liao, H	2021	Yes	Cross-sectional study	Colon Cancer	All	Heterogeneous	2160	No	Genes	MLH1, MSH2, MSH6, PMS2, TP53, APC, ATM, BRCA2	Genes	MLH1, MSH2, MSH6, PMS2, TP53, APC, ATM, BRCA2	Predictive: TMB	Y	Median TMB 76.7 VS 7.26 for somatic/germline MMR vs. germline alone	Mann-Whitney U test	NA	NA	<0.001	Y	Clinical: Age at Diagnosis	0	NA	0	NA	24	48, 59, 24, 31, 48, NA, NA, 54, 33, 65, 34, 26, 33, NA, 82, NA, NA, 33, 74, 30, 66, NA, 46, 48	Predictive: TMB	0	NA	0	NA	24	55, 110, 156, 108, 600, 94, 364, 83, 164, 116, 77, 73, 76, 14, 12, 10, 7, 7, 8, 6, 3, 5, 4, 14
7280	Ulgen 2020	Whole exome sequencing-based analysis to identify DNA damage repair deficiency as a major contributor to gliomagenesis in adult diffuse gliomas	30952131	Ulgen, E	2020	No	Cross-sectional study	Brain Cancer	All	Heterogeneous	25	No	Genes	MLH1, MSH6, NBN, FANCA, POLG, POLK	Genes	MLH1, MSH6, MSH5, NBN, RAD54B, FANCD2, BRIP1, FANCI, FANCA, MPG, MBD4, TDG, POLG, POLQ, POLK, PER1, TOPBP1, TP53, ATR, CHEK2, XAB2, XRCC6, PARP1, TDP2	Predictive: MSI, Signature 3	N						Y	Predictive: Signature 3	7	No, No, Yes, Yes, No, No, No	6	No, No, Yes, Yes, Yes, No	12	No, Yes, Yes, Yes, Yes, No, Yes, Yes, No, Yes, Yes, No	Predictive: MSI	7	MSI high x 1, MSS x 6	6	MSI high x 1, MSS x 5	12	MSI high x 4, MSS x 8
8270	Guo 2023	Molecular Profiling Provides Clinical Insights Into Targeted¬†and¬†Immunotherapies as Well as Colorectal Cancer¬†Prognosis	37146911	Guo, L	2023	No	Cross-sectional study	Colon Cancer	Advanced/Metastatic	s/p Surgery	40	No	Variants/SNPs	MLH1, PMS2, MSH2, MSH6 (Pathogenic variants)	Variants	MLH1, PMS2, MSH2, MSH6 (Pathogenic variants)	Predictive: MSI	Y	For cases with germline MMR mutations, there was a trend toward higher MSI scores in carriers with double-hit events (n = 4) than those without (n = 3), but the difference was not statistically significant due to the limited sample size.	Descriptive	NA	NA	NA	N
8193	Colle 2023	BRAF V600E/RAS Mutations and Lynch Syndrome in Patients With MSI-H/dMMR Metastatic Colorectal Cancer Treated With Immune Checkpoint Inhibitors	37023721	Colle, R	2023	Yes	Cross-sectional study	Colon Cancer	Unknown	Immunotherapy	242	No	Genes	MLH1, PMS2, MSH2, MSH6, EPCAM	Genes	MLH1, PMS2, MSH2, MSH6, EPCAM, BRAF, KRAS	Prognostic: Progression-Free Survival	Y	Patients with Lynch syndrome had better adjusted progression-free survival than sporadic patients.	Cox proportional hazards	HR=0.49	0.25-0.96	0.036	N
8548	Stundon 2023	Alternative lengthening of telomeres (ALT) in pediatric high-grade gliomas can occur without ATRX mutation and is enriched in patients with pathogenic germline mismatch repair (MMR) variants	36541551	Stundon, JL	2023	Yes	Cross-sectional study	Brain Cancer	Advanced/Metastatic	Heterogeneous	63	No	Mutational Signature	MMR	Genes	TP53, H3F3A, ATRX, NF1, TERT, HIST1H3B, DAXX	Predictive: Telomere Ratio	N						Y	Predictive: Telomere Ratio	0	NA	58	Telomere length: 0-1 = 30, 1-1.5:28	5	Telomere length: 0-1 = 1, 1-1.5:4
8583	Villani 2023	The clinical utility of integrative genomics in childhood cancer extends beyond targetable mutations	36585449	Villani, A	2023	Yes	Cross-sectional study	Multi-cancer	All	NA	26	No	Genes	MSH2, EPCAM, ATM, PMS2, TP53, SDHD, ERCC4, BARD1, NF1, MUTYH, HRAS,EGFR., CHEK2, SDHA, KIT, MSH6, BRCA2, BLM, MITF, MLH1, MSH2, PALB2, FH, BRCA1, BARD1, TP53, SMARCA4, EZH2, FANCA, PMS2, RAD51C, FANCC	Genes	ATRX, CHEK2, BRCA2, ATM, FANCD2, BARD1, ARD1A, PALB2, BRCA1, ARID1B, BRIP1, KIT, FGFR1, FGFR, ERBB4, FGFR4, EGFR, RET, PDGFRA, ALK, MET, NTRK3, BRAF, NF1, KRAS, KIAA1549-BRAF, NRAS, HRAS, PTEN, FBXW7, AKT1, MSH2, EPCAM, CDKN2A, CDKN2B, CDK4, CCND2, CCDN3, CCDN1, SMARCB1, SMARCA4, EZH2, RNF43, MYCN	Predictive: Change in Actionability	N						Y	Predictive: Change in Actionability	3	No change: 2; + Actionability: 1	20	No change: 10; + Actionability:10	3	No change: 2; + Actionability: 1
4654	Yamamoto 1998	Somatic frameshift mutations in DNA mismatch repair and proapoptosis genes in hereditary nonpolyposis colorectal cancer	9500462	Yamamoto, H	1998	No	Cross-sectional study	Colon Cancer	Early-Stage	NA	22	No	Genes	MSH2, MLH1	Genes	hMSH3, hMSH6, BAX, TGF-Beta III	Clinical: Stage	N						Y	Clinical: Stage	1	Tis	8	T2N0, T2N0, T3N1, ND, T3N0, T2N0, M1, T3N1	13	T1N0, T4N2M1, N2N0, T3N0, T2N0, T3N0, T2N0, T1N0, T3N1, T3N0, T3N0, T3N1, T2N0
10	Abida 2019	Analysis of the Prevalence of Microsatellite Instability in Prostate Cancer and Response to Immune Checkpoint Blockade	30589920	Abida, W	2019	Yes	Cohort study	Prostate Cancer	All	Heterogeneous	32	No	Genes	MSH2, MSH6, PMS2	Mutational Signature	MMR Signature, Signature 1, Signature 12, Signature 28	Predictive: Treatment Response	N						Y	Predictive: Treatment Response	2	24660: Inevaluable 01071: Inevaluable	4	011155: PR 000964: PD 024650: PR 021355: PD	5	008682: PR 025952: PR 000755: SD 018147: PD 012928: Inevaluable	Predictive: Duration of Treatment Response	2	24660: ~22 weeks 01071: ~5 weeks	4	011155: ~89 weeks 000964: ~12 weeks 024650: ~12 weeks 021355: ~8 weeks	5	008682: ~82 weeks 025952: ~32 weeks 000755: ~30 weeks 018147: ~16 weeks 012928: ~15 weeks
4076	Suwala 2021	Primary mismatch repair deficient IDH-mutant astrocytoma (PMMRDIA) is a distinct type with a poor prognosis	33216206	Suwala, A	2021	No	Cross-sectional study	Brain Cancer	Unknown	Heterogeneous	24	No	Genes	MSH6, MLH1, MSH2	Genes	ATRX, IDH1	Prognostic: Overall Survival	N						Y	Prognostic: Overall Survival	4	10, 10, 13,, 2	6	16, 27, 30, 10, NA, 9	14	10, 27, 1, 15, NA, 12, 12, NA, NA, 13, 12, 6, 16	Death	4	2 x yes, 2 x no	6	yes x 5, no x 1	14	Yes x 8, No x 3, NA x 3	Grade	4	III, III, IV, IV	6	IV, IV, III, III, IV, IV	14	III, III, IV, III, IV, IV, IV, IV, NA, NA, IV, II, IV, III
3984	Srinivasan 2021	The context-specific role of germline pathogenicity in tumorigenesis	34741162	Srinivasan, P	2021	Yes	Cross-sectional study	Multi-cancer	All	Heterogeneous	14340	No	Genes	MSK Impact Germline Gene Panel	Genes	MSK Impact Somatic Gene Panel	Clinical: Age at Diagnosis	Y	Among high-penetrance genes, carriers had a younger age of diagnosis with biallelic inactivation vs. monoallelic inactivation	Log-rank test	NA	NA	Germline: P=_1.9___10 Biallelic: P=_6___10_14;	N
5208	Cercek 2021	A Comprehensive Comparison of Early-Onset and Average-Onset Colorectal Cancers	34405229	Cercek, A	2021	Yes	Cross-sectional study	Colon Cancer	All	NA	818	No	Genes	MSK Impact Germline Gene Panel	Genes	MSK Impact Somatic Gene Panel	Clinical: Stage, Predictive: Treatment Response, Prognostic: Overall Survival	N						Y	Clinical: Stage	3	IV, NA, NA	360	I - 9, II - 20, III - 88, IV - 233	455	I - 15, II - 45, III - 125, IV - 225	Prognostic: Overall Survival	3	NA, NA, NA	360	29.94 months	455	29.86 months	Predictive: Treatment Response	3	NA, NA, NA	360	2 CR, 11 PD, 109 PR, 40 43 SD	455	3 CR, 5 PD, 94 PR, 40 SD
8739	Paller 2024	Pan-Cancer Interrogation of MUTYH Variants Reveals Biallelic Inactivation and Defective Base Excision Repair Across a Spectrum of Solid Tumors	38394468	Paller CJ	2024	Yes	Cross-sectional study	Multi-cancer	All	Heterogeneous	6572	No	Genes	MUTYH	Genes	MUTYH	Predictive: TMB	N						Y	Predictive: TMB	119 + 5244 + 738	28%, 20%, 20%	462	0.5	9	0.65
2272	Kuno 2012	Alterations of the base excision repair gene MUTYH in sporadic colorectal cancer	22641385	Kuno, T	2012	No	Cross-sectional study	Colon Cancer	All	Heterogeneous	51	No	Genes	MUTYH, KRAS	Genes	MUTYH, KRAS	Clinical: L or R Sided Cancer	Y	More likely L with MUTYH LOH (Allelic loss rs3219489)	Chi-squared test	NA	NA	0.025	N
877	Damm 2012	Prognostic implications and molecular associations of NADH dehydrogenase subunit 4 (ND4) mutations in acute myeloid leukemia	21826063	Damm, F	2012	No	Cohort study	Hematologic Malignancies	Advanced/Metastatic	Chemotherapy: Induction, Consolidation	25	No	Genes	ND4, FL3, NPM1, NRAS, IDH1, IDH2, DNMT3A, CEBPA, WT1	Genes	ND4, FL3, NPM1, NRAS, IDH1, IDH2, DNMT3A, CEBPA, WT1	Prognostic: Overall Survival	N						Y	Prognostic: Overall Survival	0		22	12 alive; 10 deceased	3	1 alive; 2 deceased
8745	Ramamoorthy 2024	Biallelic inactivation of the NF1 tumour suppressor gene in juvenile myelomonocytic leukaemia: Genetic evidence of driver function and implications for diagnostic workup	37945316	Ramamoorthy, S	2024	No	Case series / Description of cases	Hematologic Malignancies	Other	NA	41	No	Genes	NF1	Genes	ASXL1, JAK3, SETBP1, RAS2, RUNX1	Prognostic: Overall Survival	N						Y	Prognostic: Overall Survival	1	Dead at 2.3 years	34	Dead (0.6, 1.3, 0.7, 0.5, 1.4, 2.1, 1.9, 0.8, 13.3, 1.2, 4.2, 6.9); Alive (17.2, 19.5, 15.7, 4.1, 15.3, 8.4, 6.5, 4.7, 18.8, 15, 14.5, 13.4, 7.7, 12.1, 14.1, 11.3, 6.3, 13.0, 13.2, 9.6, 3.2, 10.3)	6	Alive @ 13.8 years, Dead at 1 year, Alive at 7.2 years, Alive at 5.6 years, Alive at 13.4 years, Alive at 13.1 years
854	D'Angelo 2019	The molecular landscape of glioma in patients with Neurofibromatosis 1	30531922	D'Angelo, F	2019	No	Cohort study	Brain Cancer	Unknown	NA	24	No	Genes	NF1	Genes	ATRX, CDKN2A, TP53, PIK3CA, PTEN, DOCK2/3/6, PRKCA, FDX3/8, NF1, TOP23B, BCL9/9L, IL15, TERT, FGF1	Clinical: Subtype	N						Y	Clinical: Subtype	0	NA	2	Anaplastic astrocytoma, GBM	22	Anaplastic astrocytoma: 5, Anaplastic diffuse glioma: 1, Anaplastic ganglioglioma: 1, Anaplastic xanthroastrocytoma: 1, GBM: 12, Gliosarcoma: 1, High grade glioma: 1
415	Bottillo 2009	Germline and somatic NF1 mutations in sporadic and NF1-associated malignant peripheral nerve sheath tumours	19142971	Bottillo, I	2009	No	Cohort study	Malignant peripheral nerve sheath tumours (MPNSTs)	All	NA	13	No	Variants/SNPs	NF1	Genes	NF1	Clinical: Grade	N						Y	Clinical: Grade	3	1 low, 2 high	3	3 high	7 (12 without any variants / not tested)	6 high, 1 not evaluated
4683	Yap 2018	Breast cancer in women with neurofibromatosis type 1 (NF1): a comprehensive case series with molecular insights into its aggressive phenotype	29926297	Yap, YS	2018	No	Case series / Description of cases	Breast Cancer	All	Heterogeneous	10	No	Genes	NF1	Genes	TP53, KMT2C, PIK3CA, KMT2D, AKT1, MAP3K1, SPOP, SMAD4, EGFR, MAP2K4, ARID1A, GATA3, KMT2B, CDK12	Clinical: Stage, Subtype	N						Y	Clinical: Stage	1	T3N1M0 (3)	2	4 (T4N3M1), 3(T2N2M0)	7	2 (T2N1M0), 3(T3N1M0), 2(T1N1M0), 1 (T1N0M0), 2 (T2N0M0), 4(T4N1M1), 2 (T2N0M0)	Clinical: Subtype	1	TNBC	2	HER2, TNBC	7	HER2 x 5, Luminal, TNBC
8556	Tao 2023	Pediatric Precision Medicine at the National Cancer Center Japan: Prospective Genomic Study of Pediatric Patients with Cancer as Part of the TOP-GEAR Project	37410973	Tao, K	2023	Yes	Cross-sectional study	Multi-cancer	All	Heterogeneous	76	No	Genes	NF1, RB1, TP53, BRCA1, BRCA2, SMARCB1	Genes	TP53, MAP2K1, EP300, ALK, MYCN, CREBBP, NF1, CDKN2A, CTNNB1, PDGFRA, MET, ARID1A, ALK, CDK4, MYC, NRAS, CCND1, FGFR2, SMAD4, PDGFRB, RAC1, FGFR4, KRAS, PTEN, ATRX, COPS3, HRAS, VEGFA, MDM2, GLI1, GNAS, BCOR, NF2, IGF1R, EGFR	Predictive: TMB	N						Y	Predictive: TMB	5	3.8, 0.6, 5.6, 0.7, 0	64	5, 1.3, 0, 0, 4.4, 1.3, 0.6, 1.3, 1.3, 0, 2.5, 0.6, 3.1, 0., 0, 0, 1.3, 0.6, NA, 0, 2.5, 3.8, 2.5, 0, 2.5, 0.7, 2.1, 2.1, NA, 2.1, 0.7, 3.5, 1.4, 0.7, 1.4, 0, 1.4, 2.1, 0, 0, 2.1, 1.4, 0.7, 0, 7.7, 0.7, 0/.7, 1.4, 6.3, 8.4, 1.4, 2.1, 4.2, 2.1, 9.8, 9.1, 0.7, 6.3, 2.1, 1.4, 0.7, NA, 4.9, 2.1, 1.4	7	1.4, 4.9, 0, 2.8, 0, 1.9, 0.6
2402	Li 2019	Homologous recombination DNA repair defects in PALB2-associated breast cancers	31428676	Li, A	2019	Yes	Cross-sectional study	Breast Cancer	Unknown	NA	24	No	Genes	PALB2	Loss of Heterozygosity (LOH)	PALB2 LOH	Predictive: HRD, LST	Y	HRD score not significantly associated with biallelic PALB2 inactivation; LST score significantly associated (p=0.009) with biallelic PALB2 inactivation	Fisher's exact test	NA	NA	Not significant; 0.009	Y	Predictive: HRD, LST	8	Signature 3=1, Signature 1=2, Unstable=1, N/A=4			16	Signature 3=8, Signature 1=3, Unstable=1, N/A=4
113	Anand 2021	Targeting mTOR and DNA repair pathways in residual triple negative breast cancer post neoadjuvant chemotherapy	33420229	Anand, K	2021	No	Non-randomized interventional study	Breast Cancer (TNBC)	Early-Stage	Mixed: Everolimus and neoadjuvant cisplatin	10	No	Genes	PALB2	Genes	PIK3CA, TP53, CHEK1, MET, ATR, STK11, IRS2, NOTCH2, FGF14, CCND3, DNMT3A, HRAS, PIK3R1, ERBB2, MTOR, KRAS, MCL1, CTNNA1, KDM5A, BRCA1, KIT, MSH6, MAP2K4	Predictive: Treatment Response	N						Y	Predictive: Treatment Response	1	Patient 18: Responder (RCB-1)	8	3 Responders (RCB-I) 5 Non-Responders	1	Patient 20: Responder (RCB-1)
2369	Lee 2018	Molecular analysis of PALB2-associated breast cancers	29431189	Lee, J	2018	No	Cross-sectional study	Breast Cancer	Unknown	NA	15	No	Genes	PALB2	Genes	TP53	Predictive: HRD	N						Y	Predictive: HRD	9	83, 1, 90, 76, 84, 58, 75, 61, 50	0	NA	6	73, 66, 74, 53, 101, 91
406	Borazanci 2020	An Analysis of Patients with DNA Repair Pathway Mutations Treated with a PARP Inhibitor	31391296	Borazanci, E	2020	Yes	Case series / Description of cases	Pancreatic Cancer	Advanced/Metastatic	Targeted Therapy: PARP (Olaparib)	13	No	Genes	PALB2, BRCA2, MSH6, POLD1, ATM, BRCA1, MUTYH	Genes	BRCA2, ATM, MUTYH	Clinical: Age at Diagnosis, Prognostic: Overall Survival	N						Y	Prognostic: Overall Survival	5	31.8, 24.1, 25.1, 18.2, 30.4	0	NA	2	16.5, 9.7	Clinical: Age at Diagnosis	6	64, 68, 68, 56, 69, 68	0	NA	7	31, 68, 52, 50, 59, 49, 56
8553	Takahashi 2023	Characterization of rare histological subtypes of ovarian cancer based on molecular profiling	35676859	Takahashi, N	2023	No	Cross-sectional study	Ovarian Cancer	All	Chemotherapy: Platinum-Based	53	No	Genes	PALB2, RAD51D, MSH2, BRCA1, BRCA2, BARD1	Genes	BRCA1, BRCA2, BECA2, PALB2, ATM, CHEK1, CHEK2, RAD51, RAD51B, RAD51C, RAD51D, MLH1, MSH2, MSH6, PIK3CA, KRAS, ARID1A, TP53, MUC16, PTEN, CHD4, CSMD3, MUC4, ASPM, CTNNB1, DST, FOXA2, PPP2R1A	Predictive: Treatment Resistance	N						Y	Predictive: Treatment Resistance	2	0 chemoresistant	41	5 - chemoresistant	10	0 - chemoresistant
5698	Goodman 2020	MHC-I genotype and tumor mutational burden predict response to immunotherapy	32430031	Goodman, AM	2020	Yes	Cohort study	Multi-cancer	Advanced/Metastatic	Immunotherapy	83	No	Other	Patient Harmonic-mean Best Rank (PHBR), HLA-I genotype	Mutational Signature	TMB	Prognostic: Progression-Free Survival, Overall Survival	Y	Patients with low PHBR and high TMB had better PFS and OS than patients with one or the other or neither	Kaplan Meier	NA	NA	PFS: P = 0.005 for difference between all four curves. OS: P = 0.1 for difference between all four curves.	N
4220	Tinhofer 2016	Targeted next-generation sequencing identifies molecular subgroups in squamous cell carcinoma of the head and neck with distinct outcome after concurrent chemoradiation	27681865	Tinhofer, I	2016	No	Randomized controlled trial	Head and Neck Cancer	Advanced/Metastatic	Chemotherapy: Cisplatin vs. Mitomycin C (and radiation)	97	No	Variants/SNPs	PDGFRA (rs35597368), CASP8 (rs1045485), KDR (rs2305948 rs1870377), PCDH15 (rs4935502 rs10825269)	Genes	PIK3CA, PTEN, EGFR, ERBB4, FGFR3, KRAS, TP53, CDKN2A, NOTCH1	Prognostic: Distant Metastasis-Free Survival, Locoregional Failure-Free Survival, Overall Survival	Y	"Testing for interaction revealed that the mutational status of none of these genes was able to predict a preferential efficacy of one of the two types of cCRTX tested in the ARO-0401 phase III study (data not shown)."	Cox proportional hazards	NA	NA	Not significant	N
4430	Vosoughi 2020	Common germline-somatic variant interactions in advanced urothelial cancer	33273457	Vosoughi, A	2020	Yes	Cross-sectional study	Urothelial cancer	Advanced/Metastatic	Heterogeneous	29	No	Genes	POLQ, ADPRH, AKAP12, AKR1B1, ARID1B, ARL11, BRCA2, CCDC136, CEACAM1, CLTCL1, CMTM5, DCDC2, DLG1, EPHB2, FANCA, GNMT, GORAB, GPRC5A, HIVEP3, HTRA3, IGF2R, ING1, IQGAP2, MOB1A, MYBBP1A, NAB2, NIT2, OSCP1, PANX2, PINX1, PRKCDBP, PRR5, PTGDR, PTK6, PTPN13, RECQL4, RNASEL, TCF7L2, TCHP, TFAP2A, TRIM32, TSLP, VEGFA, XPA, EPHB6, SYNM, TET2, CNDP2, ITGA7, KLK6	Genes	POLQ, ADPRH, AKAP12, AKR1B1, ARID1B, ARL11, BRCA2, CCDC136, CEACAM1, CLTCL1, CMTM5, DCDC2, DLG1, EPHB2, FANCA, GNMT, GORAB, GPRC5A, HIVEP3, HTRA3, IGF2R, ING1. IQGAP2, MOB1A, MYBBP1A. NAB2. NIT2, OSCP1, PANX2, PINX1, PRKCDBP. PRR5, PTGDR. PTK6, PTPN13, RECQL4, RNASEL, TCF7L2, TCHP, TFAP2A, TRIM32, TSLP, VEGFA, XPA, EPHB6, SYNM, TET2, CNDP2, ITGA7, KLK6	In Silico: VAF	Y	VAF difference between tumor and normal is increased in metastatic bladder cancer vs. primary bladder cancer	Wilcoxon rank-sum test	NA	NA	p=0.004	N
3423	Qing 2020	Germline variant burden in cancer genes correlates with age at diagnosis and somatic mutation burden	32415133	Qing, T	2020	Yes	Cross-sectional study	Multi-cancer	All	Heterogeneous	7468	TCGA	Variants/SNPs	Protein-Coding Variants	Variants	Protein-Coding Variants	Clinical: Age at Diagnosis	Y	Negative correlation between germline variant burden and average somatic mutational burden across increasing age groups - where germline contributes more at younger ages and somatic contributes more at older ages	Linear regression	Germline: Beta = _0.00023; Somatic: Beta = 0.0025	NA	Germline P=0.032, Somatic P<6.79e-12	N
8694	Guo 2024	Inherited polygenic effects on common hematological traits influence clonal selection on JAK2 V617F and the development of myeloproliferative neoplasms	38233595	Guo, J	2024	No	Cross-sectional study	Myeloid Neoplasms	Other	NA	40	No	Polygenic Scores	PRS	Variants	JAK2 (V617F)	Clinical: Blood counts (Hgb, Hct, WBC)	Y	Significant predictors of Hgb were female sex, PGS, Jak2 status, and Chr9 gain/loss. Significant predictors of WBC were PGS and Chr9 gain/loss	Multivariate regression	NA	NA	<0.0011	N
8766	Taraszka 2024	A comprehensive analysis of clinical and polygenic germline influences on somatic mutational burden	38211585	Taraszka, K	2024	Yes	Cross-sectional study	Multi-cancer	All	Heterogeneous	23000	TCGA	Polygenic Scores	PRS (WBC)	Mutational Signature	TMB	Predictive: Immunotherapy response / non-immunotherapy treatment response	Y	Across cancers, TMB + WBC PRS ~ not significantly associated with treatment response	Cox proportional hazards	1.003 1.011	NA	9.35E-01 3.82E-01	N
7682	Brewer 2022	Exome sequencing reveals a distinct somatic genomic landscape in breast cancer from women with germline PTEN variants	35931053	Brewer, T	2022	No	Cross-sectional study	Breast Cancer	All	Heterogeneous	44	No	Genes	PTEN	Genes	PTEN, PIK3CA, MAP3K1, TP53, GATA3, TBX3, AFF2, ATM, CBFB, KMT2C, NF1, RB1, RUNX1, AR, FANCC, APC, BRCA1, BRCA2, CDH1, CHEK2, ERBB2, FOXA1, NCOR1, PIK3R1, SF3B1, TBLXR1, ESR2, KLLN	Predictive: TMB	Y	PTEN hamartomatous breast cancers (with somatic PTEN vs. PIK3CA mutations) do not have a significantly different TMB relative to sporadic breast cancers	Kruskal Wallis test	NA	NA	0.55	N
7764	Ghosh 2022	Integrative analysis of genomic and transcriptomic data of normal, tumour, and co-occurring leukoplakia tissue triads drawn from patients with gingivobuccal oral cancer identifies signatures of tumour initiation and progression	35358331	Ghosh, A	2022	No	Cohort study	Head and Neck Cancer	Unknown	Heterogeneous	28	No	Genes	RAD50, POLD3 ,EME1, RAD54B, RPA4, MRE11, NBN, POLD1, POLD2, POLD4, RAD51 , RAD51C, RAD51B, RAD51D, RAD52, RPA1, RPA2, RPA3, BLM, SSBP1, BRCA2, TOP3A, XRCC2, XRCC3, SEM1, MUS81, RAD54L, TOP3B, PARP2, PARP3, HMGB1P1, POLD3, PARP1, PARP4, FEN1, SMUG1, NEIL2, APEX2, POLL, HMGB1, APEX1, LIG1, LIG3, MPG, MUTYH, NTHL1, OGG1, PCNA, POLE3, POLB, POLD1, POLD2, POLE, POLE2, NEIL3, POLE4, POLD4, HMGB1P40, TD…	Genes; Somatic Copy-Number Alterations	CASP8, TP53, NOTCH1, FAT1, HRAS, EPHA2, PIK3CA, FBXW7, CDKN2A, HLA-B, KMT2B, ARID2, TGFBR2, EGFR amplification, NOTCH1 deletion	Clinical: Grade	N						Y	Clinical: Grade	0	ND	8	6 well differentiated, 2 moderately differentiated	20	16 well differentiated 1 moderately differentiated 2 early inavsive 1 no data
8380	Linh 2023	Mutation spectrum of retinoblastoma patients in Vietnam	37548407	Linh, DNH	2023	No	Cross-sectional study	Retinoblastoma	Advanced/Metastatic	NA	42	No	Genes	RB1	Genes	RB1	Clinical: Age of Diagnosis	N						Y	Clinical: Age of Diagnosis	7	19, 2, 20, 20, 20, 4, 19	29	40, 23, 1, 30, 11, 6, 2, 26, 72, 7, 18, 7, 18, 29, 33, 34, 19, 27, 26, 32, 37, 46, 21	6	22, 1, 20, 26, 12, 38
5710	Gratias 2007	Allelic loss in a minimal region on chromosome 16q24 is associated with vitreous seeding of retinoblastoma	17210724	Gratias, S	2007	No	Cohort study	Retinoblastoma	Unknown	NA	37	No	Genes	RB1	Genes; Somatic Copy-Number Alterations	RB1, Chr1 (1q gain), Chr6 (6p gain), Chr16 (16q loss)	Clinical: Age at Diagnosis	Y	Age of diagnosis is younger when there is no LOH on 16q.	Wilcoxon rank-sum test	NA	NA	p < 0.001 for earlier diagnosis when loss of 16q not occurred (no LOH)	N
8783	Xu 2024	Association of the Genomic Profile of Medullary Thyroid Carcinoma with Tumor Characteristics and Clinical Outcomes in an International Multicenter Study	37842841	Xu, B	2024	No	Cross-sectional study	Renal Cell Cancer	All	Heterogeneous	231	No	Genes	RET	Genes	RAS, TP53, PIK3CA, TERT, ATM, ARID2, VHL, SETD2, MAP2K1, KMT2A, KMT2C	Prognostic: Metastasis	N						Y	Prognostic: Metastasis	38	7	189	48	4	2
7685	Brown 2022	Germline-somatic JAK2 interactions are associated with clonal expansion in myelofibrosis	36075929	Brown, D	2022	No	Cohort study	Myeloid Neoplasms	Other	Transplant	933	No	Variants/SNPs	rs4691895, rs7705526, rs2853677, rs228595, rs62053580, rs75691080, rs34978822	Other	Telomere Length	In Silico: Myelofibrosis risk	Y	SNP-telomere length corresponds to SNP myelofibrosis association	Linear model	NA	NA	5.48x10-4	N
6626	Oktay 2016	IDH-mutant glioma specific association of rs55705857 located at 8q24.21 involves MYC deregulation	27282637	Oktay, Y	2016	No	Cross-sectional study	Brain Cancer	All	NA	33	No	Variants/SNPs	rs55705857	Genes; Chromosomal Regions	IDH1, IDH2, Chr1 (1p deletion), Chr19 (19q deletion)	Clinical: Grade, Prognostic: Overall Survival	Y	Trend towards IDH-mutant/1p/19q co-deleted longer survival and long time to malignant degeneration	Kaplan Meier	NA	NA	0.234, 0.281	Y	Clinical: Grade	13 / 13 / 90	OR = 2.80 / 2.80 / 2.40	73 / 33 / 13	NA	25 / 6 / 2	11.51 / 6.11 / 5.17 (comparison to somatic only; reported significant)
991	DiFilippo 2020	Spectrum of abnormalities and clonal transformation in germline RUNX1 familial platelet disorder and a genomic comparative analysis with somatic RUNX1 mutations in MDS/MPN overlap neoplasms	32060405	DiFilippo, E	2020	No	Cohort study	Myeloid Neoplasms	Not Applicable	Heterogeneous	13	No	Genes	RUNX1	Genes	RUNX1, TET2, SRSF2, JAK2, ASXL1, EZH2, SF3B1, SH2B3	Prognostic: Overall Survival	N						Y	Prognostic: Overall Survival	4	4 alive	5	2 alive; 3 deceased	4	4 alive
446	Brown 2020	RUNX1-mutated families show phenotype heterogeneity and a somatic mutation profile unique to germline predisposed AML	32208489	Brown, AL	2020	No	Case series / Description of cases	Hematologic Malignancies	Unknown	NA	16	No	Variants/SNPs	RUNX1, JAK2, ASXL1, GATA2, CEBPA	Genes	PHF6, SH2B3, JAK2, TET2, U2AF1, RUNX1, MEIS1, TRA, DNMT3A, NRAS, CN-LOH, FLT3-ITD, BCOR, BCORL1, EZH2, KRAS	Prognostic: Progression	N						Y	Prognostic: Progression	5	3 preleukemic; 1 AML; 1 remission	0		11	6 MDS 3 MPL 1 MPN; 1 preleukemic
8403	Mandelker 2023	Expanded genetic testing of GIST patients identifies high proportion of non-syndromic patients with germline alterations	36593350	Mandelker, D	2023	Yes	Cohort study	GIST	All	Heterogeneous	103	No	Genes	SDHA, SDHB, SDHC, KIT, NF1, APC, BRCA2, MLH1, MUTYH, RECQL, TP53	Genes	KIT, PDGFRA, NF1, SDHA, BRAF, SDHB	Clinical: Focality, Subtype	N						Y	Clinical: Focality	15	Unifocal x 13, Multifocal x 2	71	Unifocal x 60, Multifocal x 11	17	Unifocal x 7, Multifocal x 8, Unknown x 2	Clinical: Subtype	15	Mixed x 7, Epithelioid x 3, Spindle x 5	71	Epitheloid x 13, Mixed x 14, Spindle x 44	17	Mixed x 4, Epithelioid x 5, Spindle x 7, Unknown x 1
7880	Ma 2022	Mutational Profile and Potential Molecular Therapeutic Targets of Pheochromocytoma	35966080	Ma, X	2022	No	Cross-sectional study	Pheochromocytoma / Paraganglioma	Other	NA	64	No	Genes	SDHA, SDHB, SDHD, RET, FH, VHL, TMEM127, MDH2, NF1	Genes	TP53, ATRX, HRAS, EPAS1, RET, SDHD, VHL, NF1, FGFR1, FH, H3F3A, FGFR2, SMO, BRAF, PIK3CA	Prognostic: Metastasis	N						Y	Prognostic: Metastasis	23	5 Y, 18 N	39	1 met, 38 non-met	2	Y, Y	Clinical: Multiple Tumors	23	4 multiple, 19 single	39	3 multiple, 36 single	2	Single, Single
868	Dai 2020	Clinical Outcome-Related Mutational Signatures Identified by Integrative Genomic Analysis in Nasopharyngeal Carcinoma	32988965	Dai, W	2020	No	Meta-analysis	Head and Neck Cancer	All	NA	105	No	Mutational Signature	Signature 3	Mutational Signature	MMR Signature	Prognostic: Overall Survival	Y	Higher hazard ratio for MMR/Sig3	Cox proportional hazards	MMR + / Signature 3 -: 5.2 MMR - / Signature 3 +: 9.1 MMR + / Signature 3 +: 12.4	MMR + / Signature 3 -: 1.1-24.1 MMR - / Signature 3 +: 1.3-61.8 MMR + / Signature 3 +: 2.6-60.6	0.035 0.023 0.002	N
7699	Chang 2022	Associations between TERT Promoter Mutations and Survival in Superficial Spreading and Nodular Melanomas in a Large Prospective Patient Cohort	35469904	Chang, GA	2022	No	Cohort study	Melanoma	Early-Stage	NA	408	No	Variants/SNPs	TERT (rs2853669)	Variants	TERT (promoter -124 C>T -146 C-T), BRAF (V600E), NRAS (Q61K)	Prognostic: Recurrence-Free Survival, Overall Survival	Y	TERT_124[C>T] mutation plus germline variant resulted in both reduced RFS and OS	Cox proportional hazards	RFS 4.51; OS 2.93	RFS [1.26-16.15}, OS: NR	0.003, 0.011	N
2800	Mezquita 2020	High Prevalence of Somatic Oncogenic Driver Alterations in Patients With NSCLC and Li-Fraumeni Syndrome	32179180	Mezquita, L; Jove, L	2020	Yes	Cohort study	Lung Cancer	All	Heterogeneous	22	No	Genes	TP53	Genes	EGFR, ROS1, PIK3CA	Clinical: Concurrent Cancers	N						Y	Clinical: Concurrent Cancers	2	No other cancers (1), Lymphoma, Medulloblastoma (1)	0	NA	20	14 with other cancers, 6 with no other cancers
5212	Ceyhan-Birsoy 2021	Paired Tumor-Normal Sequencing Provides Insights Into the TP53-Related Cancer Spectrum in Patients With Li-Fraumeni Syndrome	34240179	Ceyhan-Birsoy, O	2021	Yes	Cohort study	Multi-cancer	Advanced/Metastatic	Heterogeneous	32	No	Genes	TP53	Genes	TP53	Clinical: Age of Diagnosis, LFS Core Type	Y	Core LFS tumor type more likely to have LOH / 2nd hit in TP53	Fisher's exact test	NA	NA	0.0004	Y	Clinical: Age at Diagnosis	7 out of 34 patients	55,39,51,69,1,48,53	NA		25	19,56,25,10,55,5,33,33,1,32,29,43,43,28,28,27,45,18,18,35,44,74,75,25,20,40,38,51,43,62,61,23,37 *43, *28, *18, 74 and 75 all from same patients	Clinical: LFS Core Type	7	5-No, 2-Yes	NA		25	25 patients -> 21 Yes LFS criteria, 5 No
5793	Hebert-Magee 2019	The combined survival effect of codon 72 polymorphisms and p53 somatic mutations in breast cancer depends on race and molecular subtype	30730944	Hebert-Magee S; Yu, H	2019	No	Cross-sectional study	Breast Cancer	All	Heterogeneous	276	No	Variants/SNPs	TP53 (Arg72Pro)	Genes	TP53	Prognostic: Overall Survival	Y	AA patients more likely to die with germline+somatic mutations	Cox proportional hazards	Pro/Pro and TP53 mutated: 7.11 (Luminal), 0.65 (TNBC)	1.01-50.19 (Luminal), 0.20-2.09 (TNBC)	0.049 (Luminal), 0.473 (TNBC)	N
8375	Light 2023	Germline TP53 mutations undergo copy number gain years prior to tumor diagnosis	36604421	Light, N	2023	No	Cross-sectional study	Multi-cancer	All	Heterogeneous	22	No	Variants/SNPs	TP53 (Pathogenic / Likely pathogenic variants)	Genes	LRP1B, ASPM, PTPRT, NF1, NOTCH2, CDC27, FAT3, HLAA, MGA, TNC, TP53, POLR2B, UBC, FN1, CASP1, EPHB2, FOXP1, PABPC1, RAD51C, RAD51B, ATM, CHEK2, PMS1, ERCC2, XPO1, APC, CTNNB1, MAGI2, PIK3CA, ALK, ARAP3, INPPL1, FGFR1, MET, SMAD4, NEDD4L, TGFBR2, ATRX, KMT2A, KMT2D, BCOR, RB1, KDM6A, MLL, MLL2	Clinical: Age at Diagnosis, Subtype	N						Y	Clinical: Subtype	2	ACC, chondrosarcoma	0	NA	20	1 colorectal, 8 ACC, 5 osteo, 3 rhabdo, 3 brain tumor	Clinical: Age at Diagnosis	2	<10, 10-20	0	NA	20	<10: 12, 10-20, 6, >20: 2
7256	Tripon 2020	Association analysis of tp53 rs1042522, mdm2 rs2279744, rs3730485, mdm4 rs4245739 variants and acute myeloid leukemia susceptibility, risk stratification scores, and clinical features: An exploratory study	32492903	Tripon, F	2020	No	Cross-sectional study	Hematologic Malignancies	Other	NA	403	No	Variants/SNPs	TP53 (rs1042522), MDM2 (rs2279744 rs3730485), MDM4 (rs4245739)	Genes	FLT3, NPM1, DNMT3A	Clinical: ELN score	Y	High ELN risk score related to both TP53 rs1042522 and NPM1 mutation	MB-MDR	NA	NA	0.0345	N
7579	Zhang 2021	Germline and Somatic Genetic Variants in the p53 Pathway Interact to Affect Cancer Risk, Progression, and Drug Response	33558336	Zhang, P	2021	Yes	Cohort study	Multi-cancer	All	Heterogeneous	381	TCGA	Variants/SNPs	TP53 (rs78378222)	Genes	TP53	Prognostic: Progression-Free Survival	Y	Survival probability (PFI) best with mutTP53 and minor poly(A) germline SNP	Kaplan Meier	NA	NA	0.0063	N
6810	Raj 2020	PD-1 blockade in advanced adrenocortical carcinoma	31644329	Raj, N	2020	Yes	Non-randomized interventional study	Adrenocortical carcinoma	Advanced/Metastatic	Immunotherapy	33	No	Genes	TP53, CDKN2A, CDKN2B, APC, ATRX, CTNNB1, MEN1, RB1, TERT, DROSHA, FGFR4, NF1, AKT3, ANKRD11, ARAF, AXIN1, CDC73, KMT2A, MSH2, MUTYH, NCOA3, RBM10, SDHA, MSH6	Genes	TP53, CDKN2A, CDKN2B, APC, ATRX, CTNNB1, MEN1, RB1, TERT, DROSHA, FGFR4, NF1, AKT3, ANKRD11, ARAF, AXIN1, CDC73, KMT2A, MSH2, MUTYH, NCOA3, RBM10, SDHA, MSH6	Predictive: Objective Response Rate	N						Y	Predictive: Objective Response Rate	0	NA	29	6 PR, 6 SD, 17 PD	4	2 PR, 2 PD
8234	Franch-Expósito 2023	Associations Between Cancer Predisposition Mutations and Clonal Hematopoiesis in Patients With Solid Tumors	37561983	Franch-Expósito, S	2023	Yes	Cross-sectional study	Myeloid Neoplasms	Other	Heterogeneous	40	No	Genes	TP53, CHEK2, MUTYH, MITF, BRCA2	Genes	DNMT3A, CHEK2, BCL2L11, ASXL1, TET2, JAK2, ATM, ZRSR2, NOTCH1, KMT2D, XPO1, RPTOR, DROSHA, ERBB4, MAP3K13, NTRK1, FOXP1, EIF4A2, CREBBP, EPHA7, KIT, KDM5, HIST1H2BD, RYBP, PTPRT, ABL1, SUZ12, EZH2, RUNX1, TP53, CCNE1, ALK, SRSF2, STAG2, U2AF1, PPM1D, SMARCHA4, KDM6A, SMARCD1	Clinical: Hematology Syndrome Diagnosis	N						Y	Clinical: Hematology Syndrome Diagnosis	5	AML x 2, CLL x 1, MDS x 2	29	AML x 3, CLL x 10, MDS x 10, MPN x 6	6	CLL x 1, CML x 2, MDS x 2, MPN x 1
7565	Zeng 2021	Comprehensive Study of Germline Mutations and Double-Hit Events in Esophageal Squamous Cell Cancer	33889545	Zeng, B	2021	No	Cross-sectional study	Esophageal Cancer	All	NA	83	No	Genes	TP53, GJB2, CDKN2A, BRCA1/2, FANCG, ATM, RAD51D, CHEK2	Genes	TP53, GJB2, FAT1, CDKN2A, BRCA1, BRCA2, KMT2D, RB1, MUTYH, FANCG, ATM, RAD51D, CHEK2, SAMD9L, ERBB4, FANCD2, PTEN, POT1	Clinical: Age at Diagnosis	Y	Younger age of onset with germline-somatic	T-test	54.6 (SD=11.2, Range 36-71) germline-somatic vs. 60.6 (SD=7.8 years, range = 40-80) somatic-somatic	-12.216 to 0.177	0.056	N
8776	Wegert 2024	TRIM28 inactivation in epithelial nephroblastoma is frequent and often associated with predisposing TRIM28 germline variants	37792584	Wegert, J	2023	No	Cohort study	Wilms tumor	All	Heterogeneous	43	No	Genes	TRIM28	Genes; Methylation	TRIM28	Clinical: Subtype	N						Y	Clinical: Subtype	20	PLNR, Tx2, R, FA, Ex11, E/PLNRx3, E/T	15	DA, FA, Ex13	8	DA, Ex5, E/PLNRx2,
3424	Qing 2021	Genomic Determinants of Homologous Recombination Deficiency across Human Cancers	34572800	Qing, T	2021	Yes	Cohort study	Multi-cancer	All	Heterogeneous	9512	TCGA	Other	WES	Other	WES	Predictive: HRD	Y	BRCA (FDR < 1.5 _ 10_12) and OV (FDR < 2.4 _ 10_4). In STAD and PAAD, mostly germline variants contributed to high HRD (FDR < 7.2 _ 10_4), whereas in BLCA and LUSC high HRD were “driven” mainly by somatic mutations (FDR < 0.01, (Figure 2A))	Partial least squares path modeling	NA	NA	Both: p<1.5e-12, Germline: 7.2e-4, somatic: p<0.01	N
3741	Schumacher 1997	Correlation of germ-line mutations and two-hit inactivation of the WT1 gene with Wilms tumors of stromal-predominant histology	9108089	Schumacher, V	1997	No	Case series / Description of cases	Wilms tumor	All	Heterogeneous	19	No	Genes	WT1	Loss of Heterozygosity (LOH)	WT1 LOH	Clinical: Age at Diagnosis	N						Y	Clinical: Age at Diagnosis	11	30 months, 29 months, 7 months, 19 months, 18 months, 34 months, 24 months, 87 months, 23 months, 21 months, 20 months	3	9 months, 12 months, 8 months	5	3 months, 15 months, 12 months, 9 months, 7 months
5383	DeAlmeidaCardoso 2015	Array CGH analysis of paired blood and tumor samples from patients with sporadic Wilms tumor	26317783	de Almeida Cardoso, LC	2015	No	Case series / Description of cases	Wilms tumor	Early-Stage	Chemotherapy: Neoadjuvant (SIOP WT 2001)	14	No	Genes	WT1, WTX, CTNNB1	Genes; Chromosomal Regions	WT1, WTX, CTNNB1, array cGH	Clinical: Stage	N						Y	Clinical: Stage	0	NA	7	2 stage I; 2 stage II; 2 stage III; 1 stage V	7	1 stage I; 2 stage II; 2 stage III; 2 stage V
531	Caprini 2018	Loss of the candidate tumor suppressor ZEB1 (TCF8, ZFHX1A) in S√©zary syndrome	30518749	Caprini, E	2018	No	Cross-sectional study	Cutaneous T-cell Lymphoma	Unknown	Heterogeneous	41	No	Variants/SNPs	ZEB1 (Q840P R301* L689*)	Somatic Copy-Number Alterations	SNP6 array	Prognostic: Overall Survival	Y	ZEB1 biallelic deletion worse survival than no loss of ZEB1	Kaplan Meier	NA	NA	0.0106	N
1552	Guo 2018	Germline and somatic variations influence the somatic mutational signatures of esophageal squamous cell carcinomas in a Chinese population	30012096	Guo, J	2018	No	Cross-sectional study	Esophageal Cancer	Other	Heterogeneous	302	No	Genes	ZNF750, CDC27	Genes	ZNF750, CDC27	In Silico: NpCpG, APOBEC-2 signatures	Y	NpCpG, APOBEC-2 signatures	Wilcoxon rank-sum test	NA	NA	Germline: <0.001, <0.05; Somatic: >0.05, <0.001; Germline C: <0.05, >0.05; Somatic C: <0.01, <0.05	N
[truncated: 45 more columns]

## Sheet: S2
Articles Excluded from Systematic Review
Item #	Excluded Reasons	Title	Authors	Published Year	Journal	Volume	Issue	Pages	DOI	Notes
1	Non-human data only	Noncoding somatic and inherited single-nucleotide variants converge to promote ESR1 expression in breast cancer	Bailey, S. D.; Desai, K.; Kron, K. J.; Mazrooei, P.; Sinnott-Armstrong, N. A.; Treloar, A. E.; Dowar, M.; Thu, K. L.; Cescon, D. W.; Silvester, J.; Yang, S. Y.; Wu, X.; Pezo, R. C.; Haibe-Kains, B.; Mak, T. W.; Bedard, P. L.; Pugh, T. J.; Sallari, R. C.; Lupien, M.	2016	Nat Genet	48	10	1260-6	10.1038/ng.3650
2	Non-human data only	Germline mutations in mitochondrial complex I reveal genetic and targetable vulnerability in IDH1-mutant acute myeloid leukaemia	Bassal, M. A.; Samaraweera, S. E.; Lim, K.; Bernard, B. A.; Bailey, S.; Kaur, S.; Leo, P.; Toubia, J.; Thompson-Peach, C.; Nguyen, T.; Maung, K. Z. Y.; Casolari, D. A.; Iarossi, D. G.; Pagani, I. S.; Powell, J.; Pitson, S.; Natera, S.; Roessner, U.; Lewis, I. D.; Brown, A. L.; Tenen, D. G.; Robinson, N.; Ross, D. M.; Majeti, R.; Gonda, T. J.; Thomas, D.; D'Andrea, R. J.	2022	Nat Commun	13	1	2614	10.1038/s41467-022-30223-9
3	Non-human data only	Acquired variation outweighs inherited variation in whole genome analysis of methotrexate polyglutamate accumulation in leukemia	French, D.; Yang, W.; Cheng, C.; Raimondi, S. C.; Mullighan, C. G.; Downing, J. R.; Evans, W. E.; Pui, C. H.; Relling, M. V.	2009	Blood	113	19	4512-20	10.1182/blood-2008-07-172106
4	Non-human data only	The renal lineage factor PAX8 controls oncogenic signalling in kidney cancer	Patel, S. A.; Hirosue, S.; Rodrigues, P.; Vojtasova, E.; Richardson, E. K.; Ge, J.; Syafruddin, S. E.; Speed, A.; Papachristou, E. K.; Baker, D.; Clarke, D.; Purvis, S.; Wesolowski, L.; Dyas, A.; Castillon, L.; Caraffini, V.; Bihary, D.; Yong, C.; Harrison, D. J.; Stewart, G. D.; Machiela, M. J.; Purdue, M. P.; Chanock, S. J.; Warren, A. Y.; Samarajiwa, S. A.; Carroll, J. S.; Vanharanta, S.	2022	Nature				10.1038/s41586-022-04809-8
5	Non-human data only	Antisense inhibition of BRCA1 expression and molecular analysis of hereditary tumors indicate that functional inactivation of the p53 DNA damage response pathway is required for BRCA-associated tumorigenesis	Reedy, M. B.; Hang, T.; Gallion, H.; Arnold, S.; Smith, S. A.	2001	Gynecol Oncol	81	3	441-6	10.1006/gyno.2001.6190
6	Non-human data only	APC mutations in colorectal tumours from FAP patients are selected for CtBP-mediated oligomerization of truncated APC	Schneikert, J.; Brauburger, K.; Behrens, J.	2011	Hum Mol Genet	20	18	3554-64	10.1093/hmg/ddr273
7	Non-human data only	Defects in recombination activity caused by somatic and germline mutations in the multimerization/BRCA2 binding region of human RAD51 protein	Silva, M. C.; Bryan, K. E.; Morrical, M. D.; Averill, A. M.; Dragon, J.; Wiegmans, A. P.; Morrical, S. W.	2017	DNA Repair (Amst)	60		64-76	10.1016/j.dnarep.2017.10.008
8	Non-human data only	Hypervariable sites in the mtDNA control region are mutational hotspots	Stoneking, M.	2000	Am J Hum Genet	67	4	1029-32	10.1086/303092
9	Non-human data only	Genome-wide Profiling of Genetic Synthetic Lethality Identifies CDK12 as a Novel Determinant of PARP1/2 Inhibitor SensitivityCDK12 and PARP Inhibitor Sensitivity	Bajrami, Ilirjana; Frankum, Jessica R; Konde, Asha; Miller, Rowan E; Rehman, Farah L; Brough, Rachel; Campbell, James; Sims, David; Rafiq, Rumana; Hooper, Sean	2014	Cancer research	74	1	287-297
10	Non-human data only	Variants in LRRC34 reveal distinct mechanisms for predisposition to papillary thyroid carcinoma	Comiskey, D. F.; He, H.; Liyanarachchi, S.; Sheikh, M. S.; Genutis, L. K.; Hendrickson, I. V.; Yu, L.; Brock, P. L.; De La Chapelle, A.	2020	Journal of Medical Genetics	57	8	519-527	10.1136/jmedgenet-2019-106554
11	Non-human data only	Low levels of IGFBP7 expression in high-grade serous ovarian carcinoma is associated with patient outcome	Gambaro, K.; Quinn, M. C. J.; CÃ¡ceres-Gorriti, K. Y.; Shapiro, R. S.; Provencher, D.; Rahimi, K.; Mes-Masson, A. M.; Tonin, P. N.	2015	BMC Cancer	15	1		10.1186/s12885-015-1138-8
12	Non-human data only	Cooperation of cancer drivers with regulatory germline variants shapes clinical outcomes	Musa, J.; Cidre-Aranaz, F.; Aynaud, M. M.; Orth, M. F.; Knott, M. M. L.; Mirabeau, O.; Mazor, G.; Varon, M.; Holting, T. L. B.; Grossetete, S.; Gartlgruber, M.; Surdez, D.; Gerke, J. S.; Ohmura, S.; Marchetto, A.; Dallmayer, M.; Baldauf, M. C.; Stein, S.; Sannino, G.; Li, J.; Romero-Perez, L.; Westermann, F.; Hartmann, W.; Dirksen, U.; Gymrek, M.; Anderson, N. D.; Shlien, A.; Rotblat, B.; Kirchne…	2019	Nature Communications	10			10.1038/s41467-019-12071-2
13	Non-human data only	Identification of novel CEBPA double mutations capable of promoting familial AML via the suppression of myeloid differentiation	Zheng, Y.; Zhang, H.; Lu, Q.; Chu, X.; Gao, L.; Xiao, P.; Pan, J.; Hu, S.	2020	American Journal of Translational Research	12	10	6965-6972
1	Experimental cancer data only	Treatment Outcomes and Tumor Loss of Heterozygosity in Germline DNA Repair-deficient Prostate Cancer	Annala, M.; Struss, W. J.; Warner, E. W.; Beja, K.; Vandekerkhove, G.; Wong, A.; Khalaf, D.; SeppÃ¤lÃ¤, I. L.; So, A.; Lo, G.; Aggarwal, R.; Small, E. J.; Nykter, M.; Gleave, M. E.; Chi, K. N.; Wyatt, A. W.	2017	Eur Urol	72	1	34-42	10.1016/j.eururo.2017.02.023
2	Experimental cancer data only	Genomic basis for RNA alterations in cancer	Calabrese, C.; Davidson, N. R.; DemircioÄŸlu, D.; Fonseca, N. A.; He, Y.; Kahles, A.; Lehmann, K. V.; Liu, F.; Shiraishi, Y.; Soulette, C. M.; Urban, L.; Greger, L.; Li, S.; Liu, D.; Perry, M. D.; Xiang, Q.; Zhang, F.; Zhang, J.; Bailey, P.; Erkek, S.; Hoadley, K. A.; Hou, Y.; Huska, M. R.; Kilpinen, H.; Korbel, J. O.; Marin, M. G.; Markowski, J.; Nandi, T.; Pan-HammarstrÃ¶m, Q.; Pedamallu, C. S.…	2020	Nature	578	7793	129-136	10.1038/s41586-020-1970-0
3	Experimental cancer data only	A MicroRNA signature associated with prognosis and progression in chronic lymphocytic leukemia	Calin, G. A.; Ferracin, M.; Cimmino, A.; Di Leva, G.; Shimizu, M.; Wojcik, S. E.; Iorio, M. V.; Visone, R.; Sever, N. I.; Fabbri, M.; Iuliano, R.; Palumbo, T.; Pichiorri, F.; Roldo, C.; Garzon, R.; Sevignani, C.; Rassenti, L.; Alder, H.; Volinia, S.; Liu, C. G.; Kipps, T. J.; Negrini, M.; Croce, C. M.	2005	N Engl J Med	353	17	1793-801	10.1056/NEJMoa050995
4	Experimental cancer data only	Clinical application of liquid biopsy in cancer patients	Chang, C. M.; Lin, K. C.; Hsiao, N. E.; Hong, W. A.; Lin, C. Y.; Liu, T. C.; Chang, Y. S.; Chang, J. G.	2022	BMC Cancer	22	1	413	10.1186/s12885-022-09525-0
5	Experimental cancer data only	Genome-wide mitochondrial DNA sequence variations and lower expression of OXPHOS genes predict mitochondrial dysfunction in oral cancer tissue	Chattopadhyay, E.; De Sarkar, N.; Singh, R.; Ray, A.; Roy, R.; Paul, R. R.; Pal, M.; Ghose, S.; Ghosh, S.; Kabiraj, D.; Banerjee, R.; Roy, B.	2016	Tumour Biol	37	9	11861-11871	10.1007/s13277-016-5026-x
6	Experimental cancer data only	The genomic and transcriptomic architecture of 2,000 breast tumours reveals novel subgroups	Curtis, C.; Shah, S. P.; Chin, S. F.; Turashvili, G.; Rueda, O. M.; Dunning, M. J.; Speed, D.; Lynch, A. G.; Samarajiwa, S.; Yuan, Y.; GrÃ¤f, S.; Ha, G.; Haffari, G.; Bashashati, A.; Russell, R.; McKinney, S.; LangerÃ¸d, A.; Green, A.; Provenzano, E.; Wishart, G.; Pinder, S.; Watson, P.; Markowetz, F.; Murphy, L.; Ellis, I.; Purushotham, A.; BÃ¸rresen-Dale, A. L.; Brenton, J. D.; TavarÃ©, S.; Cal…	2012	Nature	486	7403	346-52	10.1038/nature10983
7	Experimental cancer data only	A non-BRCA1/2 hereditary breast cancer sub-group defined by aCGH profiling of genetically related patients	Didraga, M. A.; van Beers, E. H.; Joosse, S. A.; Brandwijk, K. I.; Oldenburg, R. A.; Wessels, L. F.; Hogervorst, F. B.; Ligtenberg, M. J.; Hoogerbrugge, N.; Verhoef, S.; Devilee, P.; Nederlof, P. M.	2011	Breast Cancer Res Treat	130	2	425-36	10.1007/s10549-011-1357-x
8	Experimental cancer data only	Germline variation controls the architecture of somatic alterations in tumors	Dworkin, A. M.; Ridd, K.; Bautista, D.; Allain, D. C.; Iwenofu, O. H.; Roy, R.; Bastian, B. C.; Toland, A. E.	2010	PLoS Genet	6	9	e1001136	10.1371/journal.pgen.1001136
9	Experimental cancer data only	Association of imputed prostate cancer transcriptome with disease risk reveals novel mechanisms	Emami, N. C.; Kachuri, L.; Meyers, T. J.; Das, R.; Hoffman, J. D.; Hoffmann, T. J.; Hu, D.; Shan, J.; Feng, F. Y.; Ziv, E.; Van Den Eeden, S. K.; Witte, J. S.	2019	Nat Commun	10	1	3107	10.1038/s41467-019-10808-7
10	Experimental cancer data only	Oligonucleotide microarrays demonstrate the highest frequency of ATM mutations in the mantle cell subtype of lymphoma	Fang, N. Y.; Greiner, T. C.; Weisenburger, D. D.; Chan, W. C.; Vose, J. M.; Smith, L. M.; Armitage, J. O.; Mayer, R. A.; Pike, B. L.; Collins, F. S.; Hacia, J. G.	2003	Proc Natl Acad Sci U S A	100	9	5372-7	10.1073/pnas.0831102100
11	Experimental cancer data only	Dermoscopic features of cutaneous melanoma are associated with clinical characteristics of patients and tumours and with MC1R genotype	Fargnoli, M. C.; Sera, F.; Suppa, M.; Piccolo, D.; Landi, M. T.; Chiarugi, A.; Pellegrini, C.; Seidenari, S.; Peris, K.	2014	J Eur Acad Dermatol Venereol	28	12	1768-75	10.1111/jdv.12411
12	Experimental cancer data only	Population pharmacokinetics/pharmacodynamics of erlotinib and pharmacogenomic analysis of plasma and cerebrospinal fluid drug concentrations in Japanese patients with non-small cell lung cancer	Fukudo, M.; Ikemi, Y.; Togashi, Y.; Masago, K.; Kim, Y. H.; Mio, T.; Terada, T.; Teramukai, S.; Mishima, M.; Inui, K.; Katsura, T.	2013	Clin Pharmacokinet	52	7	593-609	10.1007/s40262-013-0058-5
13	Experimental cancer data only	Integrative analysis of dysregulated microRNAs and mRNAs in multiple recurrent synchronized renal tumors from patients with von Hippel-Lindau disease	Gattolliat, C. H.; CouvÃ©, S.; Meurice, G.; OrÃ©ar, C.; Droin, N.; Chiquet, M.; Ferlicot, S.; Verkarre, V.; Vasiliu, V.; MoliniÃ©, V.; MÃ©jean, A.; Dessen, P.; Giraud, S.; Bressac-De-Paillerets, B.; Gardie, B.; Tean Teh, B.; Richard, S.; Gad, S.	2018	Int J Oncol	53	4	1455-1468	10.3892/ijo.2018.4490
14	Experimental cancer data only	Donor Clonal Hematopoiesis and Recipient Outcomes After Transplantation	Gibson, C. J.; Kim, H. T.; Zhao, L.; Murdock, H. M.; Hambley, B.; Ogata, A.; Madero-Marroquin, R.; Wang, S.; Green, L.; Fleharty, M.; Dougan, T.; Cheng, C. A.; Blumenstiel, B.; Cibulskis, C.; Tsuji, J.; Duran, M.; Gocke, C. D.; Antin, J. H.; Nikiforow, S.; DeZern, A. E.; Chen, Y. B.; Ho, V. T.; Jones, R. J.; Lennon, N. J.; Walt, D. R.; Ritz, J.; Soiffer, R. J.; Gondek, L. P.; Lindsley, R. C.	2022	J Clin Oncol	40	2	189-201	10.1200/jco.21.02286
15	Experimental cancer data only	Identification of somatic and germline mitochondrial DNA sequence variants in prostate cancer patients	GÃ³mez-Zaera, M.; Abril, J.; GonzÃ¡lez, L.; AguilÃ³, F.; Condom, E.; Nadal, M.; Nunes, V.	2006	Mutat Res	595	2025-01-02	42-51	10.1016/j.mrfmmm.2005.10.012
16	Experimental cancer data only	Most low-level microsatellite instability in colorectal cancers can be explained without an elevated slippage rate	Graham, T.; Halford, S.; Page, K. M.; Tomlinson, I. P.	2008	J Pathol	215	2	204-10	10.1002/path.2351
17	Experimental cancer data only	The BRCA1/2-directed miRNA signature predicts a good prognosis in ovarian cancer patients with wild-type BRCA1/2	Gu, Y.; Zhang, M.; Peng, F.; Fang, L.; Zhang, Y.; Liang, H.; Zhou, W.; Ao, L.; Guo, Z.	2015	Oncotarget	6	4	2397-406	10.18632/oncotarget.2963
18	Experimental cancer data only	RECQL4 and p53 potentiate the activity of polymerase Î³ and maintain the integrity of the human mitochondrial genome	Gupta, S.; De, S.; Srivastava, V.; Hussain, M.; Kumari, J.; Muniyappa, K.; Sengupta, S.	2014	Carcinogenesis	35	1	34-45	10.1093/carcin/bgt315
19	Experimental cancer data only	Prevalence of (Epi)genetic Predisposing Factors in a 5-Year Unselected National Wilms Tumor Cohort: A Comprehensive Clinical and Genomic Characterization	Hol, J. A.; Kuiper, R. P.; van Dijk, F.; Waanders, E.; van Peer, S. E.; Koudijs, M. J.; Bladergroen, R.; van Reijmersdal, S. V.; Morgado, L. M.; Bliek, J.; Lombardi, M. P.; Hopman, S.; Drost, J.; de Krijger, R. R.; van den Heuvel-Eibrink, M. M.; Jongmans, M. C. J.	2022	J Clin Oncol	40	17	1892-1902	10.1200/jco.21.02510
20	Experimental cancer data only	Spectrum of mitochondrial genomic variation in parathyroid neoplasms	Hu, Y.; Zhang, X.; Wang, O.; Xing, X.; Cui, M.; Wang, M.; Song, C.; Liao, Q.	2021	Endocrine	74	3	690-697	10.1007/s12020-021-02825-8
21	Experimental cancer data only	Copy number variability analysis of pharmacogenes in patients with lymphoma, leukemia, hepatocellular, and lung carcinoma using The Cancer Genome Atlas data	Kim, I. W.; Han, N.; Kim, M. G.; Kim, T.; Oh, J. M.	2015	Pharmacogenet Genomics	25	1	2025-01-07	10.1097/fpc.0000000000000097
22	Experimental cancer data only	Inhibition of Bcl-xL by ABT-737 enhances chemotherapy sensitivity in neurofibromatosis type 1-associated malignant peripheral nerve sheath tumor cells	Lee, S. J.; Park, H. J.; Kim, Y. H.; Kim, B. Y.; Jin, H. S.; Kim, H. J.; Han, J. H.; Yim, H.; Jeong, S. Y.	2012	Int J Mol Med	30	2	443-50	10.3892/ijmm.2012.1013
23	Experimental cancer data only	Detection of mitochondrial DNA mutations by high-throughput sequencing in the blood of breast cancer patients	Li, L. H.; Kang, T.; Chen, L.; Zhang, W.; Liao, Y.; Chen, J.; Shi, Y.	2014	Int J Mol Med	33	1	77-82	10.3892/ijmm.2013.1559
24	Experimental cancer data only	Expression QTL-based analyses reveal candidate causal genes and loci across five tumor types	Li, Q.; Stram, A.; Chen, C.; Kar, S.; Gayther, S.; Pharoah, P.; Haiman, C.; Stranger, B.; Kraft, P.; Freedman, M. L.	2014	Hum Mol Genet	23	19	5294-302	10.1093/hmg/ddu228
25	Experimental cancer data only	Transcriptomeâ€‘wide piRNA profiling in human gastric cancer	Lin, X.; Xia, Y.; Hu, D.; Mao, Q.; Yu, Z.; Zhang, H.; Li, C.; Chen, G.; Liu, F.; Zhu, W.; Shi, Y.; Zhang, H.; Zheng, J.; Sun, T.; Xu, J.; Chao, H. H.; Zheng, X.; LuÎ¿, X.	2019	Oncol Rep	41	5	3089-3099	10.3892/or.2019.7073
26	Experimental cancer data only	Exome-based proteogenomics of HEK-293 human cell line: Coding genomic variants identified at the level of shotgun proteome	Lobas, A. A.; Karpov, D. S.; Kopylov, A. T.; Solovyeva, E. M.; Ivanov, M. V.; Ilina, I. Y.; Lazarev, V. N.; Kuznetsova, K. G.; Ilgisonis, E. V.; Zgoda, V. G.; Gorshkov, M. V.; Moshkovskii, S. A.	2016	Proteomics	16	14	1980-91	10.1002/pmic.201500349
27	Experimental cancer data only	Breakpoint profiling of 64 cancer genomes reveals numerous complex rearrangements spawned by homology-independent mechanisms	Malhotra, A.; Lindberg, M.; Faust, G. G.; Leibowitz, M. L.; Clark, R. A.; Layer, R. M.; Quinlan, A. R.; Hall, I. M.	2013	Genome Res	23	5	762-76	10.1101/gr.143677.112
28	Experimental cancer data only	Mitochondrial DNA somatic mutations (point mutations and large deletions) and mitochondrial DNA variants in human thyroid pathology: a study with emphasis on HÃ¼rthle cell tumors	MÃ¡ximo, V.; Soares, P.; Lima, J.; Cameselle-Teijeiro, J.; Sobrinho-SimÃµes, M.	2002	Am J Pathol	160	5	1857-65	10.1016/s0002-9440(10)61132-7
29	Experimental cancer data only	Searching for non-RET molecular alterations in medullary thyroid carcinoma: expression analysis by mRNA differential display	Musholt, T. J.; Hanack, J.; Brehm, C.; von Wasielewski, R.; Musholt, P. B.	2005	World J Surg	29	4	472-82	10.1007/s00268-004-7748-y
30	Experimental cancer data only	Frequent Germline and Somatic Single Nucleotide Variants in the Promoter Region of the Ribosomal RNA Gene in Japanese Lung Adenocarcinoma Patients	Ohashi, R.; Umezu, H.; Sato, A.; AbÃ©, T.; Kondo, S.; Daigo, K.; Sato, S.; Hara, N.; Miyashita, A.; Ikeuchi, T.; Motoyama, T.; Kishi, M.; Nagaoka, T.; Horiuchi, K.; Shiga, A.; Okuda, S.; Sekiya, T.; Ohtsubo, A.; Ichikawa, K.; Kagamu, H.; Kikuchi, T.; Watanabe, S.; Tanuma, J. I.; Schraml, P.; Hamakubo, T.; Tsuchida, M.; Ajioka, Y.	2020	Cells	9	11		10.3390/cells9112409
31	Experimental cancer data only	Mitochondrial DNA mutations in Malaysian female breast cancer patients	Omasanggar, R.; Yu, C. Y.; Ang, G. Y.; Emran, N. A.; Kitan, N.; Baghawi, A.; Falparado Ahmad, A.; Abdullah, M. A.; Teh, L. K.; Maniam, S.	2020	PLoS One	15	5	e0233461	10.1371/journal.pone.0233461
32	Experimental cancer data only	Cancer cells are highly susceptible to accumulation of templated insertions linked to MMBIR	Osia, B.; Alsulaiman, T.; Jackson, T.; Kramara, J.; Oliveira, S.; Malkova, A.	2021	Nucleic Acids Res	49	15	8714-8731	10.1093/nar/gkab685
33	Experimental cancer data only	Frequent L1 retrotranspositions originating from TTC28 in colorectal cancer	PitkÃ¤nen, E.; Cajuso, T.; Katainen, R.; Kaasinen, E.; VÃ¤limÃ¤ki, N.; Palin, K.; Taipale, J.; Aaltonen, L. A.; Kilpivaara, O.	2014	Oncotarget	5	3	853-9	10.18632/oncotarget.1781
34	Experimental cancer data only	Variability in retinoblastoma genome stability is driven by age and not heritability	Polski, A.; Xu, L.; Prabakar, R. K.; Gai, X.; Kim, J. W.; Shah, R.; Jubran, R.; Kuhn, P.; Cobrinik, D.; Hicks, J.; Berry, J. L.	2020	Genes Chromosomes Cancer	59	10	584-590	10.1002/gcc.22859
35	Experimental cancer data only	The landscape of RNA polymerase II-associated chromatin interactions in prostate cancer	Ramanand, S. G.; Chen, Y.; Yuan, J.; Daescu, K.; Lambros, M. B.; Houlahan, K. E.; Carreira, S.; Yuan, W.; Baek, G.; Sharp, A.; Paschalis, A.; Kanchwala, M.; Gao, Y.; Aslam, A.; Safdar, N.; Zhan, X.; Raj, G. V.; Xing, C.; Boutros, P. C.; de Bono, J.; Zhang, M. Q.; Mani, R. S.	2020	J Clin Invest	130	8	3987-4005	10.1172/jci134260
36	Experimental cancer data only	Metabolome-guided genomics to identify pathogenic variants in isocitrate dehydrogenase, fumarate hydratase, and succinate dehydrogenase genes in pheochromocytoma and paraganglioma	Richter, S.; Gieldon, L.; Pang, Y.; Peitzsch, M.; Huynh, T.; Leton, R.; Viana, B.; Ercolino, T.; Mangelis, A.; Rapizzi, E.; Menschikowski, M.; Aust, D.; Kroiss, M.; Beuschlein, F.; Gudziol, V.; Timmers, H. J.; Lenders, J.; Mannelli, M.; Cascon, A.; Pacak, K.; Robledo, M.; Eisenhofer, G.; Klink, B.	2019	Genet Med	21	3	705-717	10.1038/s41436-018-0106-5
37	Experimental cancer data only	Frequent loss of BRCA1 mRNA and protein expression in sporadic ovarian cancers	Russell, P. A.; Pharoah, P. D.; De Foy, K.; Ramus, S. J.; Symmonds, I.; Wilson, A.; Scott, I.; Ponder, B. A.; Gayther, S. A.	2000	Int J Cancer	87	3	317-21	10.1002/1097-0215(20000801)87:3<317::aid-ijc2>3.0.co;2-b
38	Experimental cancer data only	Pathogenic role of B-cell receptor signaling and canonical NF-ÎºB activation in mantle cell lymphoma	Saba, N. S.; Liu, D.; Herman, S. E.; Underbayev, C.; Tian, X.; Behrend, D.; Weniger, M. A.; Skarzynski, M.; Gyamfi, J.; Fontan, L.; Melnick, A.; Grant, C.; Roschewski, M.; Navarro, A.; BeÃ , S.; Pittaluga, S.; Dunleavy, K.; Wilson, W. H.; Wiestner, A.	2016	Blood	128	1	82-92	10.1182/blood-2015-11-681460
39	Experimental cancer data only	Methylation of Breast Cancer Predisposition Genes in Early-Onset Breast Cancer: Australian Breast Cancer Family Registry	Scott, C. M.; Joo, J. E.; O'Callaghan, N.; Buchanan, D. D.; Clendenning, M.; Giles, G. G.; Hopper, J. L.; Wong, E. M.; Southey, M. C.	2016	PLoS One	11	11	e0165436	10.1371/journal.pone.0165436
40	Experimental cancer data only	An investigation on the expression of miRNAs including miR-144 and miR-34a in plasma samples of RET-positive and RET-negative medullar thyroid carcinoma patients	Shabani, N.; Sheikholeslami, S.; Paryan, M.; Zarif Yeganeh, M.; Tavangar, S. M.; Azizi, F.; Mohammadi-Yeganeh, S.; Hedayati, M.	2020	J Cell Physiol	235	2	1366-1373	10.1002/jcp.29055
41	Experimental cancer data only	Integrative epigenomic and high-throughput functional enhancer profiling reveals determinants of enhancer heterogeneity in gastric cancer	Sheng, T.; Ho, S. W. T.; Ooi, W. F.; Xu, C.; Xing, M.; Padmanabhan, N.; Huang, K. K.; Ma, L.; Ray, M.; Guo, Y. A.; Sim, N. L.; Anene-Nzelu, C. G.; Chang, M. M.; Razavi-Mohseni, M.; Beer, M. A.; Foo, R. S. Y.; Sundar, R.; Chan, Y. H.; Tan, A. L. K.; Ong, X.; Skanderup, A. J.; White, K. P.; Jha, S.; Tan, P.	2021	Genome Med	13	1	158	10.1186/s13073-021-00970-3
42	Experimental cancer data only	Copy number profiling in von Hippel-Lindau disease renal cell carcinoma	Shuib, S.; Wei, W.; Sur, H.; Morris, M. R.; McMullan, D.; Rattenberry, E.; Meyer, E.; Maxwell, P. H.; Kishida, T.; Yao, M.; Latif, F.; Maher, E. R.	2011	Genes Chromosomes Cancer	50	7	479-88	10.1002/gcc.20865
43	Experimental cancer data only	Evaluation of Commercial Circulating Tumor DNA Test in Metastatic Prostate Cancer	Taavitsainen, S.; Annala, M.; Ledet, E.; Beja, K.; Miller, P. J.; Moses, M.; Nykter, M.; Chi, K. N.; Sartor, O.; Wyatt, A. W.	2019	JCO Precis Oncol	3			10.1200/po.19.00014
44	Experimental cancer data only	Landscape of Germline and Somatic Mitochondrial DNA Mutations in Pediatric Malignancies	Triska, P.; Kaneva, K.; Merkurjev, D.; Sohail, N.; Falk, M. J.; Triche, T. J., Jr.; Biegel, J. A.; Gai, X.	2019	Cancer Res	79	7	1318-1330	10.1158/0008-5472.Can-18-2220
45	Experimental cancer data only	Routine Plasma-Based Genotyping to Comprehensively Detect Germline, Somatic, and Reversion BRCA Mutations among Patients with Advanced Solid Tumors	Vidula, N.; Rich, T. A.; Sartor, O.; Yen, J.; Hardin, A.; Nance, T.; Lilly, M. B.; Nezami, M. A.; Patel, S. P.; Carneiro, B. A.; Fan, A. C.; Brufsky, A. M.; Parker, B. A.; Bridges, B. B.; Agarwal, N.; Maughan, B. L.; Raymond, V. M.; Fairclough, S. R.; Lanman, R. B.; Bardia, A.; Cristofanilli, M.	2020	Clin Cancer Res	26	11	2546-2555	10.1158/1078-0432.Ccr-19-2933
46	Experimental cancer data only	The insertion and dysregulation of transposable elements in osteosarcoma and their association with patient event-free survival	Wang, C.; Liang, C.	2022	Sci Rep	12	1	377	10.1038/s41598-021-04208-5
47	Experimental cancer data only	Non-codingRNA sequence variations in human chronic lymphocytic leukemia and colorectal cancer	Wojcik, S. E.; Rossi, S.; Shimizu, M.; Nicoloso, M. S.; Cimmino, A.; Alder, H.; Herlea, V.; Rassenti, L. Z.; Rai, K. R.; Kipps, T. J.; Keating, M. J.; Croce, C. M.; Calin, G. A.	2010	Carcinogenesis	31	2	208-15	10.1093/carcin/bgp209
48	Experimental cancer data only	Genomic alterations in tumor tissue and ctDNA from Chinese pancreatic cancer patients	Xiong, A.; Ma, N.; Wei, G.; Li, C.; Li, K.; Wang, B.	2021	Am J Cancer Res	11	9	4551-4567
49	Experimental cancer data only	Comprehensive landscape and interference of clonal haematopoiesis mutations for liquid biopsy: A Chinese pan-cancer cohort	Xu, E.; Su, K.; Zhou, Y.; Gong, L.; Xuan, Y.; Liao, M.; Cao, J.; Li, Y.; Lu, Y.; Zhao, Y.; Chen, F.	2021	J Cell Mol Med	25	21	10279-10290	10.1111/jcmm.16966
50	Experimental cancer data only	Simultaneous identification of clinically relevant RB1 mutations and copy number alterations in aqueous humor of retinoblastoma eyes	Xu, L.; Shen, L.; Polski, A.; Prabakar, R. K.; Shah, R.; Jubran, R.; Kim, J. W.; Biegel, J.; Kuhn, P.; Cobrinik, D.; Hicks, J.; Gai, X.; Berry, J. L.	2020	Ophthalmic Genet	41	6	526-532	10.1080/13816810.2020.1799417
51	Experimental cancer data only	Genome-wide copy number profiling reveals molecular evolution from diagnosis to relapse in childhood acute lymphoblastic leukemia	Yang, J. J.; Bhojwani, D.; Yang, W.; Cai, X.; Stocco, G.; Crews, K.; Wang, J.; Morrison, D.; Devidas, M.; Hunger, S. P.; Willman, C. L.; Raetz, E. A.; Pui, C. H.; Evans, W. E.; Relling, M. V.; Carroll, W. L.	2008	Blood	112	10	4178-83	10.1182/blood-2008-06-165027
52	Experimental cancer data only	Biallelic germline and somatic mutations in malignant mesothelioma: multiple mutations in transcription regulators including mSWI/SNF genes	Yoshikawa, Y.; Sato, A.; Tsujimura, T.; Otsuki, T.; Fukuoka, K.; Hasegawa, S.; Nakano, T.; Hashimoto-Tamaoki, T.	2015	Int J Cancer	136	3	560-71	10.1002/ijc.29015
53	Experimental cancer data only	Genomic mutation profiling using liquid biopsy in Korean patients with prostate cancer: Circulating tumor DNA mutation predicts the development of castration resistance	Yu, J.; Cho, E.; Choi, J.; Lim, J. E.; Lee, J.; Kang, M.; Sung, H. H.; Jeong, B. C.; Seo, S. I.; Jeon, S. S.; Lee, H. M.; Jeon, H. G.	2021	Investig Clin Urol	62	2	224-232	10.4111/icu.20200406
54	Experimental cancer data only	Proteogenomic characterization of human colon and rectal cancer	Zhang, B.; Wang, J.; Wang, X.; Zhu, J.; Liu, Q.; Shi, Z.; Chambers, M. C.; Zimmerman, L. J.; Shaddox, K. F.; Kim, S.; Davies, S. R.; Wang, S.; Wang, P.; Kinsinger, C. R.; Rivers, R. C.; Rodriguez, H.; Townsend, R. R.; Ellis, M. J.; Carr, S. A.; Tabb, D. L.; Coffey, R. J.; Slebos, R. J.; Liebler, D. C.	2014	Nature	513	7518	382-7	10.1038/nature13438
55	Experimental cancer data only	Identifying Putative Susceptibility Genes and Evaluating Their Associations with Somatic Mutations in Human Cancers	Chen, Z.; Wen, W.; Beeghly-Fadiel, A.; Shu, X. O.; DÃ­ez-Obrero, V.; Long, J.; Bao, J.; Wang, J.; Liu, Q.; Cai, Q.; Moreno, V.; Zheng, W.; Guo, X.	2019	American Journal of Human Genetics	105	3	477-492	10.1016/j.ajhg.2019.07.006
56	Experimental cancer data only	Use of CRISPR-modified human stem cell organoids to study the origin of mutational signatures in cancer	Drost, J.; van Boxtel, R.; Blokzijl, F.; Mizutani, T.; Sasaki, N.; Sasselli, V.; de Ligt, J.; Behjati, S.; Grolleman, J. E.; van Wezel, T.; Nik-Zainal, S.; Kuiper, R. P.; Cuppen, E.; Clevers, H.	2017	Science	358	6360	234-+	10.1126/science.aao3130
57	Experimental cancer data only	Single cell genomics reveals activation signatures of endogenous SCAR's networks in aneuploid human embryos and clinically intractable malignant tumors	Glinsky, Gennadi V.	2016	Cancer Letters	381	1	176-193	10.1016/j.canlet.2016.08.001
58	Experimental cancer data only	Transcriptomic profiling and quantitative high-throughput (qHTS) drug screening of CDH1 deficient hereditary diffuse gastric cancer (HDGC) cells identify treatment leads for familial gastric cancer	Ina, Chen; Mathews-Greiner, Lesley; Dandan, Li; Abisoye-Ogunniyan, Abisola; Ray, Satyajit; Yansong, Bian; Shukla, Vivek; Xiaohu, Zhang; Guha, Raj; Thomas, Craig; Gryder, Berkley; Zacharia, Athina; Beane, Joal D.; Ravichandran, Sarangan; Ferrer, Marc; Rudloff, Udo; Chen, Ina; Li, Dandan; Bian, Yansong; Zhang, Xiaohu	2017	Journal of Translational Medicine	15		2025-01-16	10.1186/s12967-017-1197-5
59	Experimental cancer data only	Cell free tumor DNA for DLBCL genotyping in a phase II randomized trial comparing standard rchop versus BRCAP as first line treatment in patients with poor IPI DLBCL	Martinez, N.; De Villambrosia, S. G.; Perena, A.; Tonda, R.; Beltran, S.; Gut, M.; Carrillo-Cruz, E.; Grande, C.; Martin, A.; Nicolas, C.; et al.,	2018	Blood	132			10.1182/blood-2018-99-113757
60	Experimental cancer data only	Serum levels of mature microRNAs in DICER1-mutated pleuropulmonary blastoma	Murray, M. J.; Bailey, S.; Raby, K. L.; Saini, H. K.; De Kock, L.; Burke, G. A. A.; Foulkes, W. D.; Enright, A. J.; Coleman, N.; Tischkowitz, M.	2014	Oncogenesis	3	2		10.1038/oncsis.2014.1
61	Experimental cancer data only	miRNA expression profiling of hereditary breast tumors from BRCA1- and BRCA2-germline mutation carriers in Brazil	PessÃ´a-Pereira, Danielle; Evangelista, Adriane FeijÃ³; Causin, Rhafaela Lima; da Costa Vieira, RenÃ© Aloisio; AbrahÃ£o-Machado, Lucas Faria; Santana, Iara Viana Vidigal; da Silva, Vinicius Duval; de Souza, Karen Cristina Borba; de Oliveira-Silva, Renato JosÃ©; Fernandes, Gabriela Carvalho; Reis, Rui Manuel; Palmero, Edenir InÃªz; Marques, MÃ¡rcia Maria Chiquitelli	2020	BMC Cancer	20	1	2025-01-10	10.1186/s12885-020-6640-y
62	Experimental cancer data only	TP53 R72P polymorphism modulates DNA methylation in hepatocellular carcinoma	Rebbani, K.; Marchio, A.; Ezzikouri, S.; Afifi, R.; Kandil, M.; Bahri, O.; Triki, H.; Essaid El Feydi, A.; Dejean, A.; Benjelloun, S.; Pineau, P.	2015	Molecular Cancer	14	1	2025-01-14	10.1186/s12943-015-0340-2
63	Experimental cancer data only	Distinct DNA Methylation Signatures in Neuroendocrine Tumors Specific for Primary Site and Inherited Predisposition	Tirosh, Amit; Killian, Jonathan Keith; Petersen, David; Zhu, Yuelin Jack; Walker, Robert L.; Blau, Jenny E.; Nilubol, Naris; Patel, Dhaval; Agarwal, Sunita K.; Weinstein, Lee Scott; Meltzer, Paul; Kebebew, Electron	2020	Journal of Clinical Endocrinology & Metabolism	105	10	2025-01-10	10.1210/clinem/dgaa477
64	Experimental cancer data only	Distinct genome-wide methylation patterns in sporadic and hereditary nonfunctioning pancreatic neuroendocrine tumors	Tirosh, Amit; Mukherjee, Sanjit; Lack, Justin; Gara, Sudheer Kumar; Wang, Sophie; Quezado, Martha M.; Keutgen, Xavier M.; Wu, Xiaolin; Cam, Maggie; Kumar, Suresh; Patel, Dhaval; Nilubol, Naris; Tyagi, Monica Varun; Kebebew, Electron	2019	Cancer (0008543X)	125	8	1247-1257	10.1002/cncr.31930
65	Experimental cancer data only	Targeting Germline- and Tumor-Associated Nucleotide Excision Repair Defects in Cancer	Topka, S.; Steinsnyder, Z.; Ravichandran, V.; Tkachuk, K.; Kemel, Y.; Bandlamudi, C.; Madsen, M. W.; Furberg, H.; Ouerfelli, O.; Rudin, C. M.; Iyer, G.; Lipkin, S. M.; Mukherjee, S.; Solit, D. B.; Berger, M. F.; Bajorin, D. F.; Rosenberg, J. E.; Taylor, B. S.; de Stanchina, E.; Vijai, J.; Offit, K.	2021	Clinical cancer research	27	7	1997-2010	10.1158/1078-0432.Ccr-20-3322
66	Experimental cancer data only	Modified eQTL and Somatic DNA Segment Alterations in Esophageal Squamous Cell Carcinoma for Genes Related to Immunity, DNA Repair, and Inflammation	Yang, H. H.; Liu, H.; Hu, N.; Su, H.; Wang, C.; Giffen, C.; Goldstein, A. M.; Taylor, P. R.; Lee, M. P.	2022	Cancers	14	7		10.3390/cancers14071629
67	Experimental cancer data only	Implications of mitochondrial DNA variants in pediatric B-cell acute lymphoblastic leukemia	Jain, A.; Katiyar, A.; Singh, R.; Bakhshi, S.; Singh, H.; Palanichamy, J. K.; Singh, A.	2022	Egyptian Journal of Medical Human Genetics	23	1		10.1186/s43042-022-00347-0
68	Experimental cancer data only	Drug-gene Interaction Screens Coupled to Tumor Data Analyses Identify the Most Clinically Relevant Cancer Vulnerabilities Driving Sensitivity to PARP Inhibition	Jamal, K.; Galbiati, A.; Armenia, J.; Illuzzi, G.; Hall, J.; Bentouati, S.; Barrell, D.; Ahdesmaeki, M.; O'Connor, M. J.; Leo, E.; Forment, J.; Functional Genomics Ctr Grp	2022	Cancer Research Communications	2	10	1244-1254	10.1158/2767-9764.Crc-22-0119
69	Experimental cancer data only	Interval breast cancer is associated with interferon immune response	Ugalde-Morales, Emilio; Grassmann, Felix; Humphreys, Keith; Li, Jingmei; Eriksson, Mikael; Tobin, Nicholas P.; Lindstrom, Linda S.; Vallon-Christersson, Johan; Borg, Ake; Hall, Per; Czene, Kamila	2022	European Journal of Cancer	162		194-205	10.1016/j.ejca.2021.12.003
70	Experimental cancer data only	Impact of iodine supplementation and mtDNA mutations on papillary thyroid cancer in saudi women following a vegetarian diet	Abdulaziz Binobead, M.; H. Al-Qahtani W; Alhumaidi Alotaibi, M.; M. S. Al-Shamrani S; S. Alghamdi H; Mostafa Domiaty, D.; Ahmed Safhi, F.; Abdullah Alduwish, M.; Abdulla Alwail, M.; Abdallah Al-Ghamdi, N.; Abdullah Alshahrani, S.; Saeed Al-Qahtani, W.	2023	Cell Mol Biol (Noisy-le-grand)	69	12	248-255	10.14715/cmb/2023.69.12.39
71	Experimental cancer data only	Practical Utility of Liquid Biopsies for Evaluating Genomic Alterations in Castration-Resistant Prostate Cancer	Jeong, S. H.; Kyung, D.; Yuk, H. D.; Jeong, C. W.; Lee, W.; Yoon, J. K.; Kim, H. P.; Bang, D.; Kim, T. Y.; Lim, Y.; Kwak, C.	2023	Cancers	15	10		10.3390/cancers15102847
72	Experimental cancer data only	Targeted long-read sequencing of the Ewing sarcoma 6p25.1 susceptibility locus identifies germline-somatic interactions with EWSR1-FLI1 binding	Lee, O. W.; Rodrigues, C.; Lin, S. H.; Luo, W.; Jones, K.; Brown, D. W.; Zhou, W.; Karlins, E.; Khan, S. M.; Baulande, S.; Raynal, V.; Surdez, D.; Reynaud, S.; Rubio, R. A.; Zaidi, S.; GrossetÃªte, S.; Ballet, S.; Lapouble, E.; Laurence, V.; Pierron, G.; Gaspar, N.; Corradini, N.; Marec-BÃ©rard, P.; Rothman, N.; Dagnall, C. L.; Burdett, L.; Manning, M.; Wyatt, K.; Yeager, M.; Chari, R.; Leisenrin…	2023	Am J Hum Genet	110	3	427-441	10.1016/j.ajhg.2023.01.017
73	Experimental cancer data only	BRCA2 Germline Mutations Identify Gastric Cancers Responsive to PARP Inhibitors	Petrelli, A.; Rizzolio, S.; Pietrantonio, F.; Bellomo, S. E.; Benelli, M.; De Cecco, L.; Romagnoli, D.; Berrino, E.; OrrÃ¹, C.; Ribisi, S.; Moya-Rull, D.; Migliore, C.; Conticelli, D.; Maina, I. M.; Puliga, E.; Serra, V.; Pellegrino, B.; Llop-Guevara, A.; Musolino, A.; Siena, S.; Sartore-Bianchi, A.; Prisciandaro, M.; Morano, F.; Antista, M.; Fumagalli, U.; De Manzoni, G.; Degiuli, M.; Baiocchi, …	2023	Cancer Res	83	10	1699-1710	10.1158/0008-5472.Can-22-2620
1	Germline data no somatic data	Familial seborrhoeic keratosis associated with multiple 'pure reticulated acanthomas' and infundibulocystic basal cell carcinomas	AgustÃ­ MartÃ­nez, J.; Bella-Navarro, R.; GarcÃ­a-GarcÃ­a, A. B.; Bueno, E.; GonzÃ¡lez-Sarmiento, R.; Navarro, L.; Sanchez-Sendra, B.; Revert, A.; JordÃ¡, E.; Monteagudo, C.	2017	Br J Dermatol	177	6	1654-1663	10.1111/bjd.15736
2	Germline data no somatic data	Targeted sequencing of crucial cancer causing genes of breast cancer in Saudi patients	Alanazi, M.; Parine, N. R.; Shaik, J. P.; Al Naeem, A.; Aldhaian, S.	2020	Saudi J Biol Sci	27	10	2651-2659	10.1016/j.sjbs.2020.05.047
3	Germline data no somatic data	Long-term survival and transmission of INI1-mutation via nonpenetrant males in a family with rhabdoid tumour predisposition syndrome	Ammerlaan, A. C.; Ararou, A.; Houben, M. P.; Baas, F.; Tijssen, C. C.; Teepen, J. L.; Wesseling, P.; Hulsebos, T. J.	2008	Br J Cancer	98	2	474-9	10.1038/sj.bjc.6604156
4	Germline data no somatic data	Genetic analysis of mitochondrial complex II subunits SDHD, SDHB and SDHC in paraganglioma and phaeochromocytoma susceptibility	Astuti, D.; Hart-Holden, N.; Latif, F.; Lalloo, F.; Black, G. C.; Lim, C.; Moran, A.; Grossman, A. B.; Hodgson, S. V.; Freemont, A.; Ramsden, R.; Eng, C.; Evans, D. G.; Maher, E. R.	2003	Clin Endocrinol (Oxf)	59	6	728-33	10.1046/j.1365-2265.2003.01914.x
5	Germline data no somatic data	Germline NF1 mutational spectra and loss-of-heterozygosity analyses in patients with pheochromocytoma and neurofibromatosis type 1	Bausch, B.; Borozdin, W.; Mautner, V. F.; Hoffmann, M. M.; Boehm, D.; Robledo, M.; Cascon, A.; Harenberg, T.; Schiavi, F.; Pawlu, C.; Peczkowska, M.; Letizia, C.; Calvieri, S.; Arnaldi, G.; Klingenberg-Noftz, R. D.; Reisch, N.; Fassina, A.; Brunaud, L.; Walter, M. A.; Mannelli, M.; MacGregor, G.; Palazzo, F. F.; Barontini, M.; Walz, M. K.; Kremens, B.; Brabant, G.; PfÃ¤ffle, R.; Koschker, A. C.; …	2007	J Clin Endocrinol Metab	92	7	2784-92	10.1210/jc.2006-2833
6	Germline data no somatic data	SDHAF2 mutations in familial and sporadic paraganglioma and phaeochromocytoma	Bayley, J. P.; Kunst, H. P.; Cascon, A.; Sampietro, M. L.; Gaal, J.; Korpershoek, E.; Hinojar-Gutierrez, A.; Timmers, H. J.; Hoefsloot, L. H.; Hermsen, M. A.; SuÃ¡rez, C.; Hussain, A. K.; Vriends, A. H.; Hes, F. J.; Jansen, J. C.; Tops, C. M.; Corssmit, E. P.; de Knijff, P.; Lenders, J. W.; Cremers, C. W.; Devilee, P.; Dinjens, W. N.; de Krijger, R. R.; Robledo, M.	2010	Lancet Oncol	11	4	366-72	10.1016/s1470-2045(10)70007-3
7	Germline data no somatic data	A germline mutation in PBRM1 predisposes to renal cell carcinoma	Benusiglio, P. R.; CouvÃ©, S.; Gilbert-Dussardier, B.; Deveaux, S.; Le Jeune, H.; Da Costa, M.; Fromont, G.; Memeteau, F.; Yacoub, M.; Coupier, I.; Leroux, D.; MÃ©jean, A.; Escudier, B.; Giraud, S.; Gimenez-Roqueplo, A. P.; Blondel, C.; Frouin, E.; Teh, B. T.; Ferlicot, S.; Bressac-de Paillerets, B.; Richard, S.; Gad, S.	2015	J Med Genet	52	6	426-30	10.1136/jmedgenet-2014-102912
8	Germline data no somatic data	Discovery analysis of TCGA data reveals association between germline genotype and survival in ovarian cancer patients	Braun, R.; Finney, R.; Yan, C.; Chen, Q. R.; Hu, Y.; Edmonson, M.; Meerzaman, D.; Buetow, K.	2013	PLoS One	8	3	e55037	10.1371/journal.pone.0055037
9	Germline data no somatic data	LOH and mutation analysis of CDKN2 in primary human ovarian cancers	Campbell, I. G.; Foulkes, W. D.; Beynon, G.; Davis, M.; Englefield, P.	1995	Int J Cancer	63	2	222-5	10.1002/ijc.2910630213
10	Germline data no somatic data	Inherited cancer syndromes in 220 Italian ovarian cancer patients	Carnevali, I.; Riva, C.; Chiaravalli, A. M.; Sahnane, N.; Di Lauro, E.; Viel, A.; Rovera, F.; Formenti, G.; Ghezzi, F.; Sessa, F.; Tibiletti, M. G.	2019	Cancer Genet	237		55-62	10.1016/j.cancergen.2019.06.005
11	Germline data no somatic data	Two Cases of Carcinosarcomas of the Ovary Involved in Hereditary Cancer Syndromes	Carnevali, I. W.; Cimetti, L.; Sahnane, N.; Libera, L.; Cavallero, A.; Formenti, G.; Riva, C.; Tibiletti, M. G.	2017	Int J Gynecol Pathol	36	1	64-70	10.1097/pgp.0000000000000290
12	Germline data no somatic data	The TGFBR1*6A allele is not associated with susceptibility to colorectal cancer in a Spanish population: a case-control study	Castillejo, A.; Mata-Balaguer, T.; Montenegro, P.; Ochoa, E.; LÃ¡zaro, R.; MartÃ­nez-CantÃ³, A.; Castillejo, M. I.; Guarinos, C.; BarberÃ¡, V. M.; GuillÃ©n-Ponce, C.; Carrato, A.; Soto, J. L.	2009	BMC Cancer	9		193	10.1186/1471-2407-9-193
13	Germline data no somatic data	Germ-line mutations in epidermal growth factor receptor (EGFR) are rare but may contribute to oncogenesis: a novel germ-line mutation in EGFR detected in a patient with lung adenocarcinoma	Centeno, I.; Blay, P.; SantamarÃ­a, I.; Astudillo, A.; Pitiot, A. S.; Osorio, F. G.; GonzÃ¡lez-Arriaga, P.; Iglesias, F.; MenÃ©ndez, P.; TardÃ³n, A.; Freije, J. M.; BalbÃ­n, M.	2011	BMC Cancer	11		172	10.1186/1471-2407-11-172
14	Germline data no somatic data	Germ-line mutations of the p16INK4(MTS1) gene occur in a subset of patients with hepatocellular carcinoma	Chaubert, P.; Gayer, R.; Zimmermann, A.; Fontolliet, C.; Stamm, B.; Bosman, F.; Shaw, P.	1997	Hepatology	25	6	1376-81	10.1002/hep.510250613
15	Germline data no somatic data	BCL10 somatic mutations rarely occur in gastric lymphoma: detection of high frequency of polymorphisms in BCL10 coding region	Chen, Y. W.; Wong, K. Y.; Au, W. Y.; Liang, R. H.; Srivastava, G.	2001	Cancer Genet Cytogenet	127	2	184-7	10.1016/s0165-4608(00)00442-8
16	Germline data no somatic data	Unique ethnic features of DDX41 mutations in patients with idiopathic cytopenia of undetermined significance, myelodysplastic syndrome, or acute myeloid leukemia	Choi, E. J.; Cho, Y. U.; Hur, E. H.; Jang, S.; Kim, N.; Park, H. S.; Lee, J. H.; Lee, K. H.; Kim, S. H.; Hwang, S. H.; Seo, E. J.; Park, C. J.; Lee, J. H.	2022	Haematologica	107	2	510-518	10.3324/haematol.2020.270553
17	Germline data no somatic data	Somatic mutations in the STK11/LKB1 gene are uncommon in rare gynecological tumor types associated with Peutz-Jegher's syndrome	Connolly, D. C.; Katabuchi, H.; Cliby, W. A.; Cho, K. R.	2000	Am J Pathol	156	1	339-45	10.1016/s0002-9440(10)64735-9
18	Germline data no somatic data	Germline MBD4 Mutations and Predisposition to Uveal Melanoma	Derrien, A. C.; Rodrigues, M.; Eeckhoutte, A.; Dayot, S.; Houy, A.; Mobuchon, L.; Gardrat, S.; Lequin, D.; Ballet, S.; Pierron, G.; Alsafadi, S.; Mariani, O.; El-Marjou, A.; Matet, A.; Colas, C.; Cassoux, N.; Stern, M. H.	2021	J Natl Cancer Inst	113	1	80-87	10.1093/jnci/djaa047
19	Germline data no somatic data	TRIM28 haploinsufficiency predisposes to Wilms tumor	Diets, I. J.; Hoyer, J.; Ekici, A. B.; Popp, B.; Hoogerbrugge, N.; van Reijmersdal, S. V.; Bhaskaran, R.; Hadjihannas, M.; Vasileiou, G.; Thiel, C. T.; Seven, D.; Uebe, S.; Ilencikova, D.; Waanders, E.; Mavinkurve-Groothuis, A. M. C.; Roeleveld, N.; de Krijger, R. R.; Wegert, J.; Graf, N.; Vokuhl, C.; Agaimy, A.; Gessler, M.; Reis, A.; Kuiper, R. P.; Jongmans, M. C. J.; Metzler, M.	2019	Int J Cancer	145	4	941-951	10.1002/ijc.32167
20	Germline data no somatic data	Parental origin of mutations of the retinoblastoma gene	Dryja, T. P.; Mukai, S.; Petersen, R.; Rapaport, J. M.; Walton, D.; Yandell, D. W.	1989	Nature	339	6225	556-8	10.1038/339556a0
21	Germline data no somatic data	Functional significance of germline EPAS1 variants	Dwight, T.; Kim, E.; Bastard, K.; Benn, D. E.; Eisenhofer, G.; Richter, S.; Mannelli, M.; Rapizzi, E.; Prejbisz, A.; PÄ™czkowska, M.; Pacak, K.; Clifton-Bligh, R.	2021	Endocr Relat Cancer	28	2	97-109	10.1530/erc-20-0280
22	Germline data no somatic data	Whole-exome sequencing identifies rare pathogenic variants in new predisposition genes for familial colorectal cancer	Esteban-Jurado, C.; Vila-CasadesÃºs, M.; Garre, P.; Lozano, J. J.; Pristoupilova, A.; Beltran, S.; MuÃ±oz, J.; OcaÃ±a, T.; Balaguer, F.; LÃ³pez-CerÃ³n, M.; Cuatrecasas, M.; Franch-ExpÃ³sito, S.; PiquÃ©, J. M.; Castells, A.; Carracedo, A.; Ruiz-Ponte, C.; AbulÃ­, A.; Bessa, X.; Andreu, M.; Bujanda, L.; CaldÃ©s, T.; CastellvÃ­-Bel, S.	2015	Genet Med	17	2	131-42	10.1038/gim.2014.89
23	Germline data no somatic data	Molecular characterization of high-grade serous ovarian cancers occurring in younger and older women	Filippova, O. T.; Selenica, P.; Pareja, F.; Vahdatinia, M.; Zhu, Y.; Pei, X.; Riaz, N.; Long Roche, K.; Chi, D. S.; Abu-Rustum, N. R.; Ellenson, L. H.; Reis-Filho, J. S.; Zamarin, D.; Weigelt, B.	2021	Gynecol Oncol	161	2	545-552	10.1016/j.ygyno.2021.02.028
24	Germline data no somatic data	Mutational Signature Analysis Reveals NTHL1 Deficiency to Cause a Multi-tumor Phenotype	Grolleman, J. E.; de Voer, R. M.; Elsayed, F. A.; Nielsen, M.; Weren, R. D. A.; Palles, C.; Ligtenberg, M. J. L.; Vos, J. R.; Ten Broeke, S. W.; de Miranda, Nfcc; Kuiper, R. A.; Kamping, E. J.; Jansen, E. A. M.; Vink-BÃ¶rger, M. E.; Popp, I.; Lang, A.; Spier, I.; HÃ¼neburg, R.; James, P. A.; Li, N.; Staninova, M.; Lindsay, H.; Cockburn, D.; Spasic-Boskovic, O.; Clendenning, M.; Sweet, K.; CapellÃ…	2019	Cancer Cell	35	2	256-266.e5	10.1016/j.ccell.2018.12.011
25	Germline data no somatic data	Clinical features of multiple endocrine neoplasia type 1 (MEN1) phenocopy without germline MEN1 gene mutations: analysis of 20 Japanese sporadic cases with MEN1	Hai, N.; Aoki, N.; Shimatsu, A.; Mori, T.; Kosugi, S.	2000	Clin Endocrinol (Oxf)	52	4	509-18	10.1046/j.1365-2265.2000.00966.x
26	Germline data no somatic data	Short telomeres resulting from heritable mutations in the telomerase reverse transcriptase gene predispose for a variety of malignancies	Hills, M.; Lansdorp, P. M.	2009	Ann N Y Acad Sci	1176		178-90	10.1111/j.1749-6632.2009.04565.x
27	Germline data no somatic data	Identification of germline missense mutations and rare allelic variants in the ATM gene in early-onset breast cancer	Izatt, L.; Greenman, J.; Hodgson, S.; Ellis, D.; Watts, S.; Scott, G.; Jacobs, C.; Liebmann, R.; Zvelebil, M. J.; Mathew, C.; Solomon, E.	1999	Genes Chromosomes Cancer	26	4	286-94
28	Germline data no somatic data	Somatic intronic microsatellite loci differentiate glioblastoma from lower-grade gliomas	Karunasena, E.; McIver, L. J.; Rood, B. R.; Wu, X.; Zhu, H.; Bavarva, J. H.; Garner, H. R.	2014	Oncotarget	5	15	6003-14	10.18632/oncotarget.2076
29	Germline data no somatic data	A germline JAK2 SNP is associated with predisposition to the development of JAK2(V617F)-positive myeloproliferative neoplasms	Kilpivaara, O.; Mukherjee, S.; Schram, A. M.; Wadleigh, M.; Mullally, A.; Ebert, B. L.; Bass, A.; Marubayashi, S.; Heguy, A.; Garcia-Manero, G.; Kantarjian, H.; Offit, K.; Stone, R. M.; Gilliland, D. G.; Klein, R. J.; Levine, R. L.	2009	Nat Genet	41	4	455-9	10.1038/ng.342
30	Germline data no somatic data	BRCA2 loss-of-function germline mutations are associated with esophageal squamous cell carcinoma risk in Chinese	Ko, J. M.; Ning, L.; Zhao, X. K.; Chai, A. W. Y.; Lei, L. C.; Choi, S. S. A.; Tao, L.; Law, S.; Kwong, A.; Lee, N. P.; Chan, K. T.; Lo, A.; Song, X.; Chen, P. N.; Chang, Y. L.; Wang, L. D.; Lung, M. L.	2020	Int J Cancer	146	4	1042-1051	10.1002/ijc.32619
31	Germline data no somatic data	Prevalence of mutations in BRCA and homologous recombination repair genes and real-world standard of care of Asian patients with HER2-negative metastatic breast cancer starting first-line systemic cytotoxic chemotherapy: subgroup analysis of the global BREAKOUT study	Koh, S. J.; Ohsumi, S.; Takahashi, M.; Fukuma, E.; Jung, K. H.; Ishida, T.; Dai, M. S.; Chang, C. H.; Dalvi, T.; Walker, G.; Bennett, J.; O'Shaughnessy, J.; BalmaÃ±a, J.	2022	Breast Cancer	29	1	92-102	10.1007/s12282-021-01283-4
32	Germline data no somatic data	Location of Mutation in BRCA2 Gene and Survival in Patients with Ovarian Cancer	Labidi-Galy, S. I.; Olivier, T.; Rodrigues, M.; Ferraioli, D.; Derbel, O.; Bodmer, A.; Petignat, P.; Rak, B.; Chopin, N.; Tredan, O.; Heudel, P. E.; Stuckelberger, S.; Meeus, P.; Meraldi, P.; Viassolo, V.; Ayme, A.; Chappuis, P. O.; Stern, M. H.; Houdayer, C.; Stoppa-Lyonnet, D.; Buisson, A.; Golmard, L.; Bonadona, V.; Ray-Coquard, I.	2018	Clin Cancer Res	24	2	326-333	10.1158/1078-0432.Ccr-17-2136
33	Germline data no somatic data	The orphan nuclear receptor NR0B2 could be a novel susceptibility locus associated with microsatellite-stable, APC mutation-negative early-onset colorectal carcinomas with metabolic manifestation	Lam, K. K.; Sethi, R.; Tan, G.; Tomar, S.; Lo, M.; Loi, C.; Tang, C. L.; Tan, E.; Lai, P. S.; Cheah, P. Y.	2021	Genes Chromosomes Cancer	60	2	61-72	10.1002/gcc.22904
34	Germline data no somatic data	Integrative genome-wide analysis of the determinants of RNA splicing in kidney renal clear cell carcinoma	Lehmann, K. V.; Kahles, A.; Kandoth, C.; Lee, W.; Schultz, N.; Stegle, O.; RÃ¤tsch, G.	2015	Pac Symp Biocomput	20		44-55
35	Germline data no somatic data	Integrative eQTL-based analyses reveal the biology of breast cancer risk loci	Li, Q.; Seo, J. H.; Stranger, B.; McKenna, A.; Pe'er, I.; Laframboise, T.; Brown, M.; Tyekucheva, S.; Freedman, M. L.	2013	Cell	152	3	633-41	10.1016/j.cell.2012.12.034
36	Germline data no somatic data	Germline mutations of the PTEN gene in Cowden disease, an inherited breast and thyroid cancer syndrome	Liaw, D.; Marsh, D. J.; Li, J.; Dahia, P. L.; Wang, S. I.; Zheng, Z.; Bose, S.; Call, K. M.; Tsou, H. C.; Peacocke, M.; Eng, C.; Parsons, R.	1997	Nat Genet	16	1	64-7	10.1038/ng0597-64
37	Germline data no somatic data	A novel BRCA2 mutation in prostate cancer sensitive to combined radiotherapy and androgen deprivation therapy	Liu, Q.; Tong, D.; Liu, G.; Yi, Y.; Xu, J.; Yang, X.; Wang, L.; Zhang, J.; Ye, J.; Zhang, Y.; Yuan, G.; Wang, P.; Chen, R.; Guan, Y.; Yi, X.; Zhang, D.; Jiang, J.	2018	Cancer Biol Ther	19	8	669-675	10.1080/15384047.2018.1451278
38	Germline data no somatic data	RET proto-oncogene mutations in multiple endocrine neoplasia type 2 and medullary thyroid carcinoma	Marsh, D. J.; Mulligan, L. M.; Eng, C.	1997	Horm Res	47	2025-04-06	168-78	10.1159/000185461
39	Germline data no somatic data	Spectrum of hematological malignancies, clonal evolution and outcomes in 144 Mayo Clinic patients with germline predisposition syndromes	Martin, E. S.; Ferrer, A.; Mangaonkar, A. A.; Khan, S. P.; Kohorst, M. A.; Joshi, A. Y.; Hogan, W. J.; Olteanu, H.; Moyer, A. M.; Al-Kali, A.; Tefferi, A.; Chen, D.; Wudhikarn, K.; Go, R.; Viswanatha, D.; He, R.; Ketterling, R.; Nguyen, P. L.; Oliveira, J. L.; Gangat, N.; Lasho, T.; Patnaik, M. M.	2021	Am J Hematol	96	11	1450-1460	10.1002/ajh.26321
40	Germline data no somatic data	TERT and JAK2 polymorphisms define genetic predisposition to myeloproliferative neoplasms in Japanese patients	Matsuguma, M.; Yujiri, T.; Yamamoto, K.; Kajimura, Y.; Tokunaga, Y.; Tanaka, M.; Tanaka, Y.; Nakamura, Y.; Tanizawa, Y.	2019	Int J Hematol	110	6	690-698	10.1007/s12185-019-02742-7
41	Germline data no somatic data	Inherited TP53 Variants and Risk of Prostate Cancer	Maxwell, K. N.; Cheng, H. H.; Powers, J.; Gulati, R.; Ledet, E. M.; Morrison, C.; Le, A.; Hausler, R.; Stopfer, J.; Hyman, S.; Kohlmann, W.; Naumer, A.; Vagher, J.; Greenberg, S. E.; Naylor, L.; Laurino, M.; Konnick, E. Q.; Shirts, B. H.; AlDubayan, S. H.; Van Allen, E. M.; Nguyen, B.; Vijai, J.; Abida, W.; Carlo, M. I.; Dubard-Gault, M.; Lee, D. J.; Maese, L. D.; Mandelker, D.; Montgomery, B.; M…	2022	Eur Urol	81	3	243-250	10.1016/j.eururo.2021.10.036
42	Germline data no somatic data	Germline alterations in patients with biliary tract cancers: A spectrum of significant and previously underappreciated findings	Maynard, H.; Stadler, Z. K.; Berger, M. F.; Solit, D. B.; Ly, M.; Lowery, M. A.; Mandelker, D.; Zhang, L.; Jordan, E.; El Dika, I.; Kemel, Y.; Ladanyi, M.; Robson, M. E.; O'Reilly, E. M.; Abou-Alfa, G. K.	2020	Cancer	126	9	1995-2002	10.1002/cncr.32740
43	Germline data no somatic data	Germline and somatic KLLN alterations in breast cancer dysregulate G2 arrest	Nizialek, E. A.; Peterson, C.; Mester, J. L.; Downes-Kelly, E.; Eng, C.	2013	Hum Mol Genet	22	12	2451-61	10.1093/hmg/ddt097
44	Germline data no somatic data	A common JAK2 haplotype confers susceptibility to myeloproliferative neoplasms	Olcaydu, D.; Harutyunyan, A.; JÃ¤ger, R.; Berg, T.; Gisslinger, B.; Pabinger, I.; Gisslinger, H.; Kralovics, R.	2009	Nat Genet	41	4	450-4	10.1038/ng.341
45	Germline data no somatic data	Germline MBD4 deficiency causes a multi-tumor predisposition syndrome	Palles, C.; West, H. D.; Chew, E.; Galavotti, S.; Flensburg, C.; Grolleman, J. E.; Jansen, E. A. M.; Curley, H.; Chegwidden, L.; Arbe-Barnes, E. H.; Lander, N.; Truscott, R.; Pagan, J.; Bajel, A.; Sherwood, K.; Martin, L.; Thomas, H.; Georgiou, D.; Fostira, F.; Goldberg, Y.; Adams, D. J.; van der Biezen, S. A. M.; Christie, M.; Clendenning, M.; Thomas, L. E.; Deltas, C.; Dimovski, A. J.; Dymerska…	2022	Am J Hum Genet	109	5	953-960	10.1016/j.ajhg.2022.03.018
46	Germline data no somatic data	Germline loss-of-function mutations in LZTR1 predispose to an inherited disorder of multiple schwannomas	Piotrowski, A.; Xie, J.; Liu, Y. F.; Poplawski, A. B.; Gomes, A. R.; Madanecki, P.; Fu, C.; Crowley, M. R.; Crossman, D. K.; Armstrong, L.; Babovic-Vuksanovic, D.; Bergner, A.; Blakeley, J. O.; Blumenthal, A. L.; Daniels, M. S.; Feit, H.; Gardner, K.; Hurst, S.; Kobelka, C.; Lee, C.; Nagy, R.; Rauen, K. A.; Slopis, J. M.; Suwannarat, P.; Westman, J. A.; Zanko, A.; Korf, B. R.; Messiaen, L. M.	2014	Nat Genet	46	2	182-7	10.1038/ng.2855
47	Germline data no somatic data	Sequence analysis of the mismatch repair gene hMSH6 in the germline of patients with familial and sporadic colorectal cancer	Plaschke, J.; Kruppa, C.; Tischler, R.; Bocker, T.; Pistorius, S.; Dralle, H.; RÃ¼schoff, J.; Saeger, H. D.; Fishel, R.; Schackert, H. K.	2000	Int J Cancer	85	5	606-13	10.1002/(sici)1097-0215(20000301)85:5<606::aid-ijc2>3.0.co;2-b
48	Germline data no somatic data	Genome-Wide Association Study of Susceptibility Loci for T-Cell Acute Lymphoblastic Leukemia in Children	Qian, M.; Zhao, X.; Devidas, M.; Yang, W.; Gocho, Y.; Smith, C.; Gastier-Foster, J. M.; Li, Y.; Xu, H.; Zhang, S.; Jeha, S.; Zhai, X.; Sanda, T.; Winter, S. S.; Dunsmore, K. P.; Raetz, E. A.; Carroll, W. L.; Winick, N. J.; Rabin, K. R.; Zweidler-Mckay, P. A.; Wood, B.; Pui, C. H.; Evans, W. E.; Hunger, S. P.; Mullighan, C. G.; Relling, M. V.; Loh, M. L.; Yang, J. J.	2019	J Natl Cancer Inst	111	12	1350-1357	10.1093/jnci/djz043
49	Germline data no somatic data	Mutations associated with familial melanoma impair p16INK4 function	Ranade, K.; Hussussian, C. J.; Sikorski, R. S.; Varmus, H. E.; Goldstein, A. M.; Tucker, M. A.; Serrano, M.; Hannon, G. J.; Beach, D.; Dracopoli, N. C.	1995	Nat Genet	10	1	114-6	10.1038/ng0595-114
50	Germline data no somatic data	Germline Mutations in PALB2, BRCA1, and RAD51C, Which Regulate DNA Recombination Repair, in Patients With Gastric Cancer	Sahasrabudhe, R.; Lott, P.; Bohorquez, M.; Toal, T.; Estrada, A. P.; Suarez, J. J.; Brea-FernÃ¡ndez, A.; Cameselle-Teijeiro, J.; Pinto, C.; Ramos, I.; Mantilla, A.; Prieto, R.; Corvalan, A.; Norero, E.; Alvarez, C.; Tapia, T.; Carvallo, P.; Gonzalez, L. M.; Cock-Rada, A.; Solano, A.; Neffa, F.; Della Valle, A.; Yau, C.; Soares, G.; Borowsky, A.; Hu, N.; He, L. J.; Han, X. Y.; Taylor, P. R.; Golds…	2017	Gastroenterology	152	5	983-986.e6	10.1053/j.gastro.2016.12.010
51	Germline data no somatic data	Identification of a Novel Pathogenic Germline KDR Variant in Melanoma	Silva, I. P.; Salhi, A.; Giles, K. M.; Vogelsang, M.; Han, S. W.; Ismaili, N.; Lui, K. P.; Robinson, E. M.; Wilson, M. A.; Shapiro, R. L.; Pavlick, A.; Zhong, J.; Kirchhoff, T.; Osman, I.	2016	Clin Cancer Res	22	10	2377-85	10.1158/1078-0432.Ccr-15-1811
52	Germline data no somatic data	Low incidence of IL6ST (gp130) mutations in exon 6 in lung cancer of a Chinese cohort	Sun, L.; Sui, L.; Cong, X.; Ma, K.; Ma, X.; Huang, Y.; Fan, C.; Fu, X.; Ma, K.	2014	Cancer Genet	207	2025-07-08	291-8	10.1016/j.cancergen.2014.07.003
53	Germline data no somatic data	Low incidence of BRCA2 mutations in breast carcinoma and other cancers	Teng, D. H.; Bogden, R.; Mitchell, J.; Baumgard, M.; Bell, R.; Berry, S.; Davis, T.; Ha, P. C.; Kehrer, R.; Jammulapati, S.; Chen, Q.; Offit, K.; Skolnick, M. H.; Tavtigian, S. V.; Jhanwar, S.; Swedlund, B.; Wong, A. K.; Kamb, A.	1996	Nat Genet	13	2	241-4	10.1038/ng0696-241
54	Germline data no somatic data	Allelic imbalance at rs6983267 suggests selection of the risk allele in somatic colorectal tumor evolution	Tuupanen, S.; NiittymÃ¤ki, I.; Nousiainen, K.; Vanharanta, S.; Mecklin, J. P.; Nuorva, K.; JÃ¤rvinen, H.; Hautaniemi, S.; Karhu, A.; Aaltonen, L. A.	2008	Cancer Res	68	1	14-7	10.1158/0008-5472.Can-07-5766
55	Germline data no somatic data	Fanconi anemia and homologous recombination gene variants are associated with functional DNA repair defects in vitro and poor outcome in patients with advanced head and neck squamous cell carcinoma	Verhagen, C. V. M.; Vossen, D. M.; Borgmann, K.; Hageman, F.; GrÃ©nman, R.; Verwijs-Janssen, M.; Mout, L.; Kluin, R. J. C.; Nieuwland, M.; Severson, T. M.; Velds, A.; Kerkhoven, R.; O'Connor, M. J.; van der Heijden, M.; van Velthuysen, M. L.; Verheij, M.; Wreesmann, V. B.; Wessels, L. F. A.; van den Brekel, M. W. M.; Vens, C.	2018	Oncotarget	9	26	18198-18213	10.18632/oncotarget.24797
56	Germline data no somatic data	Characterisation of heterozygous PMS2 variants in French patients with Lynch syndrome	Wang, Q.; Leclerc, J.; Bougeard, G.; Olschwang, S.; Vasseur, S.; Cassinari, K.; Boidin, D.; Lefol, C.; NaÃ¯bo, P.; FrÃ©bourg, T.; Buisine, M. P.; Baert-Desurmont, S.	2020	J Med Genet	57	7	487-499	10.1136/jmedgenet-2019-106256
57	Germline data no somatic data	Germline APOBEC3B deletion is associated with breast cancer risk in an Asian multi-ethnic cohort and with immune cell presentation	Wen, W. X.; Soo, J. S.; Kwan, P. Y.; Hong, E.; Khang, T. F.; Mariapun, S.; Lee, C. S.; Hasan, S. N.; Rajadurai, P.; Yip, C. H.; Mohd Taib, N. A.; Teo, S. H.	2016	Breast Cancer Res	18	1	56	10.1186/s13058-016-0717-1
58	Germline data no somatic data	Spectrum of germ-line MLH1 and MSH2 mutations in Austrian patients with hereditary nonpolyposis colorectal cancer	Wolf, B.; Henglmueller, S.; Janschek, E.; Ilencikova, D.; Ludwig-Papst, C.; Bergmann, M.; Mannhalter, C.; Wrba, F.; Karner-Hanusch, J.	2005	Wien Klin Wochenschr	117	2025-07-08	269-77	10.1007/s00508-005-0337-8
59	Germline data no somatic data	Mutation and polymorphism in the EGFR-TK domain associated with lung cancer	Zhang, W.; Stabile, L. P.; Keohavong, P.; Romkes, M.; Grandis, J. R.; Traynor, A. M.; Siegfried, J. M.	2006	J Thorac Oncol	1	7	635-47
60	Germline data no somatic data	Interpreting Sequence Variation in PDAC-Predisposing Genes Using a Multi-Tier Annotation Approach Performed at the Gene, Patient, and Cohort Level	Zimmermann, M. T.; Mathison, A. J.; Stodola, T.; Evans, D. B.; Abrudan, J. L.; Demos, W.; Tschannen, M.; Aldakkak, M.; Geurts, J.; Lomberk, G.; Tsai, S.; Urrutia, R.	2021	Front Oncol	11		606820	10.3389/fonc.2021.606820
61	Germline data no somatic data	Accumulation of p53 protein is frequent in ovarian cancers associated with BRCA1 and BRCA2 germline mutations	Zweemer, R. P.; Shaw, P. A.; Verheijen, R. M.; Ryan, A.; Berchuck, A.; Ponder, B. A.; Risch, H.; McLaughlin, J. R.; Narod, S. A.; Menko, F. H.; Kenemans, P.; Jacobs, I. J.	1999	J Clin Pathol	52	5	372-5	10.1136/jcp.52.5.372
62	Germline data no somatic data	Novel mutations in actionable breast cancer genes by targeted sequencing in an ethnically homogenous cohort	Akter, H.; Sultana, N.; Martuza, N.; Siddiqua, A.; Dity, N. J.; Rahaman, M. A.; Samara, B.; Sayeed, A.; Basiruzzaman, M.; Rahman, M. M.; Hoq, M. R.; Amin, M. R.; Baqui, M. A.; Woodbury-Smith, M.; Uddin, K. M. F.; Islam, S. S.; Awwal, R.; Berdiev, B. K.; Uddin, M.	2019	BMC Medical Genetics	20	1		10.1186/s12881-019-0881-0
63	Germline data no somatic data	Spectrum of Germline Mutations Within Fanconi Anemia-Associated Genes Across Populations of Varying Ancestry	Chan, S. H.; Ni, Y.; Li, S. T.; Teo, J. X.; Ishak, N. D. B.; Lim, W. K.; Ngeow, J.	2021	JNCI Cancer Spectrum	5	1		10.1093/jncics/pkaa117
64	Germline data no somatic data	An intronic variant of the TGFBR1 gene is associated with carcinomas of the kidney and bladder	Chen, T.; Jackson, C.; Costello, B.; Singer, N.; Colligan, B.; Douglass, L.; Pemberton, J.; Deddens, J.; Graff, J. R.; Carter, J. H.	2004	International journal of cancer	112	3	420-425	10.1002/ijc.20419
65	Germline data no somatic data	Int7G24A variant of transforming growth factor-Î² receptor type I is associated with invasive breast cancer	Chen, T.; Jackson, C. R.; Link, A.; Markey, M. P.; Colligan, B. M.; Douglass, L. E.; Pemberton, J. O.; Deddens, J. A.; Graft, J. R.; Carter, J. H.	2006	Clinical cancer research	12	2	392-397	10.1158/1078-0432.CCR-05-1518
66	Germline data no somatic data	Differential effects on gene transcription and hematopoietic differentiation correlate with GATA2 mutant disease phenotypes	Chong, C. E.; Venugopal, P.; Stokes, P. H.; Lee, Y. K.; Brautigan, P. J.; Yeung, D. T. O.; Babic, M.; Engler, G. A.; Lane, S. W.; Klingler-Hoffmann, M.; Matthews, J. M.; D'Andrea, R. J.; Brown, A. L.; Hahn, C. N.; Scott, H. S.	2018	Leukemia	32	1	194-202	10.1038/leu.2017.196
67	Germline data no somatic data	Cancer incidence, patterns, and genotype-phenotype associations in individuals with pathogenic or likely pathogenic germline TP53 variants: an observational cohort study	de Andrade, Kelvin CÃ©sar; Khincha, Payal P.; Hatton, Jessica N.; Frone, Megan N.; Wegman-Ostrosky, Talia; Mai, Phuong L.; Best, Ana F.; Savage, Sharon A.	2021	Lancet Oncology	22 1077-4114 (Print)	12	1787-1798	10.1016/S1470-2045(21)00580-5
68	Germline data no somatic data	Val66Met BDNF polymorphism as a vulnerability factor for inflammation-associated depressive symptoms in women with breast cancer	Dooley, L. N.; Ganz, P. A.; Cole, S. W.; Crespi, C. M.; Bower, J. E.	2016	Journal of Affective Disorders	197		43-50	10.1016/j.jad.2016.02.059
69	Germline data no somatic data	Identification of germline susceptibility loci in ETV6-RUNX1-rearranged childhood acute lymphoblastic leukemia	Ellinghaus, E.; Stanulla, M.; Richter, G.; Ellinghaus, D.; te Kronnie, G.; Cario, G.; Cazzaniga, G.; Horstmann, M.; Panzer GrÃ¼mayer, R.; CavÃ©, H.; Trka, J.; Cinek, O.; Teigler-Schlegel, A.; ElSharawy, A.; HÃ¤sler, R.; Nebel, A.; Meissner, B.; Bartram, T.; Lescai, F.; Franceschi, C.	2012	Leukemia (08876924)	26	5	902-909	10.1038/leu.2011.302
70	Germline data no somatic data	Genome-wide single-nucleotide polymorphism analysis in juvenile myelomonocytic leukemia identifies uniparental disomy surrounding the NF1 locus in cases associated with neurofibromatosis but not in cases with mutant RAS or PTPN11	Flotho, C.; Steinemann, D.; Mullighan, C. G.; Neale, G.; Mayer, K.; Kratz, C. P.; Schlegelberger, B.; Downing, J. R.; Niemeyer, C. M.	2007	Oncogene	26	39	5816-5821	10.1038/sj.onc.1210361
71	Germline data no somatic data	Association Between Hereditary Lobular Breast Cancer Due to CDH1 Variants and Gastric Cancer Risk	Gamble, Lauren A.; Rossi, Alexander; Fasaye, Grace-Ann; Kesserwan, Chimene; Hernandez, Jonathan M.; Blakely, Andrew M.; Davis, Jeremy L.	2022	JAMA Surgery	157	1	18-22	10.1001/jamasurg.2021.5118
72	Germline data no somatic data	Assessment of Risk of Hereditary Predisposition in Patients With Melanoma and/or Mesothelioma and Renal Neoplasia	Gupta, Sounak; Erickson, Lori A.; Lohse, Christine M.; Shen, Wei; Pitel, Beth A.; Knight, Shannon M.; Halling, Kevin C.; Herrera-Hernandez, Loren; Boorjian, Stephen A.; Thompson, R. Houston; Leibovich, Bradley C.; Jimenez, Rafael E.; Cheville, John C.	2021	JAMA Network Open	4	11	e2132615-e2132615	10.1001/jamanetworkopen.2021.32615
73	Germline data no somatic data	Evaluation of Genetic Predisposition for MYCN-Amplified Neuroblastoma	Hungate, E. A.; Applebaum, M. A.; Skol, A. D.; Vaksman, Z.; Diamond, M.; McDaniel, L.; Volchenboum, S. L.; Stranger, B. E.; Maris, J. M.; Diskin, S. J.; Onel, K.; Cohn, S. L.	2017	Journal of the National Cancer Institute	109	10		10.1093/jnci/djx093
74	Germline data no somatic data	Prevalence of disease-causing genes in Japanese patients with BRCA1/2-wildtype hereditary breast and ovarian cancer syndrome	Kaneyasu, T.; Mori, S.; Yamauchi, H.; Ohsumi, S.; Ohno, S.; Aoki, D.; Baba, S.; Kawano, J.; Miki, Y.; Matsumoto, N.; Nagasaki, M.; Yoshida, R.; Akashi-Tanaka, S.; Iwase, T.; Kitagawa, D.; Masuda, K.; Hirasawa, A.; Arai, M.; Takei, J.; Ide, Y.; Gotoh, O.; Yaguchi, N.; Nishi, M.; Kaneko, K.; Matsuyama, Y.; Okawa, M.; Suzuki, M.; Nezu, A.; Yokoyama, S.; Amino, S.; Inuzuka, M.; Noda, T.; Nakamura, S.	2020	NPJ Breast Cancer	6	1		10.1038/s41523-020-0163-1
75	Germline data no somatic data	Candidate gene mutation analysis in bilateral adrenal pheochromocytoma and sympathetic paraganglioma	Korpershoek, E.; Petri, B. J.; Van Nederveen, F. H.; Dinjens, W. N. M.; Verhofstad, A. A.; De Herder, W. W.; Schmid, S.; Perren, A.; Komminoth, P.; De Krijger, R. R.	2007	Endocrine-Related Cancer	14	2	453-462	10.1677/ERC-06-0044
76	Germline data no somatic data	The clinical pathogensis significance associated with mutation of APC MCR in colorectal neoplasms	Lai, R., Sr.; Feng, L.; Liu, L.; Xie, L.; Wu, X.; Zhang, S.; Tang, X.; Geng, J.; Chen, T.	2009	Journal of clinical oncology	27		e15119-e15119
77	Germline data no somatic data	Mismatch repair universal screening of endometrial cancers (Muse) in a canadian cohort	Lawrence, J.; Richer, L.; Arseneau, J.; Zeng, X.; Chong, G.; Weber, E.; Foulkes, W.; Palma, L.	2021	Current Oncology	28	1	509-522	10.3390/curroncol28010052
78	Germline data no somatic data	Germline BRCA, chemotherapy response scores, and survival in the neoadjuvant treatment of ovarian cancer	Lee, Yong Jae; Kim, Hyun-Soo; Rim, John Hoon; Lee, Jung-Yun; Nam, Eun Ji; Kim, Sang Wun; Kim, Sunghoon; Kim, Young Tae	2020	BMC Cancer	20	1	2025-01-09	10.1186/s12885-020-6688-8
79	Germline data no somatic data	Specific haplotypes of the RET proto-oncogene are over-represented in patients with sporadic papillary thyroid carcinoma	Lesueur, F.; Corbex, M.; McKay, J. D.; Lima, J.; Soares, P.; Griseri, P.; Burgess, J.; Ceccherini, I.; Landolfi, S.; Papotti, M.; Amorim, A.; Goldgar, D. E.; Romeo, G.	2002	Journal of Medical Genetics	39	4	260-265	10.1136/jmg.39.4.260
80	Germline data no somatic data	Multigene panel germline testing of 1333 Czech patients with ovarian cancer	Lhotova, K.; Stolarova, L.; Zemankova, P.; Vocka, M.; Janatova, M.; Borecka, M.; Cerna, M.; Jelinkova, S.; Kral, J.; Volkova, Z.; Urbanova, M.; Kleiblova, P.; Machackova, E.; Foretova, L.; Hazova, J.; Vasickova, P.; Lhota, F.; Koudova, M.; Cerna, L.; Tavandzis, S.; Indrakova, J.; Hruskova, L.; Kosarova, M.; Vrtel, R.; Stranecky, V.; Kmoch, S.; Zikan, M.; Macurek, L.; Kleibl, Z.; Soukupova, J.	2020	Cancers	12	4		10.3390/cancers12040956
81	Germline data no somatic data	Searching for association of the CAG repeat polymorphism in the mitochondrial DNA polymerase gamma gene (POLG) with colorectal cancer	Linkowska, K.; JawieÅ„, A.; MarszaÅ‚ek, A.; Skonieczna, K.; Grzybowski, T.	2015	Acta biochimica Polonica	62	3	625-627	10.18388/abp.2014_935
82	Germline data no somatic data	Relevance of pharmacogenetic polymorphisms with response to docetaxel, cisplatin, and 5-fluorouracil chemotherapy in esophageal cancer	Nomura, Hisanaga; Tsuji, Daiki; Ueno, Shohei; Kojima, Takashi; Fujii, Satoshi; Yano, Tomonori; Daiko, Hiroyuki; Demachi, Ken; Itoh, Kunihiko; Kawasaki, Toshikatsu	2022	Investigational New Drugs	40	2	420-429
83	Germline data no somatic data	Spectrum of Germline RET variants identified by targeted sequencing and associated Multiple Endocrine Neoplasia type 2 susceptibility in China	Qi, Xiao-Ping; Zhao, Jian-Qiang; Fang, Xu-Dong; Lian, Bi-Jun; Li, Feng; Wang, Hui-Hong; Cao, Zhi-Lie; Zheng, Wei-Hui; Cao, Juan; Chen, Yu	2021	BMC Cancer	21	1	2025-01-17	10.1186/s12885-021-08116-9
84	Germline data no somatic data	Comprehensive functional annotation of susceptibility variants identifies genetic heterogeneity between lung adenocarcinoma and squamous cell carcinoma	Qin, N.; Li, Y.; Wang, C.; Zhu, M.; Dai, J.; Hong, T.; Albanes, D.; Lam, S.; Tardon, A.; Chen, C.; Goodman, G.; Bojesen, S. E.; Landi, M. T.; Johansson, M.; Risch, A.; Wichmann, H. E.; Bickeboller, H.; Rennert, G.; Arnold, S.; Brennan, P.; Field, J. K.; Shete, S.; Le Marchand, L.; Melander, O.; Brunnstrom, H.; Liu, G.; Hung, R. J.; Andrew, A.; Kiemeney, L. A.; Zienolddiny, S.; Grankvist, K.; Joha…	2021	Frontiers of medicine	15	2	275-291	10.1007/s11684-020-0779-4
85	Germline data no somatic data	Association of variations in HLA class II and other loci with susceptibility to EGFR-mutated lung adenocarcinoma	Shiraishi, K.; Okada, Y.; Takahashi, A.; Kamatani, Y.; Momozawa, Y.; Ashikawa, K.; Kunitoh, H.; Matsumoto, S.; Takano, A.; Shimizu, K.; Goto, A.; Tsuta, K.; Watanabe, S. I.; Ohe, Y.; Watanabe, Y.; Goto, Y.; Nokihara, H.; Furuta, K.; Yoshida, A.; Goto, K.; Hishida, T.; Tsuboi, M.; Tsuchihara, K.; Miyagi, Y.; Nakayama, H.; Yokose, T.; Tanaka, K.; Nagashima, T.; Ohtaki, Y.; Maeda, D.; Imai, K.; Mina…	2016	Nature Communications	7			10.1038/ncomms12451
86	Germline data no somatic data	POLE and POLD1 pathogenic variants in the proofreading domain in papillary thyroid cancer	Siraj, A. K.; Bu, R.; Arshad, M.; Iqbal, K.; Parvathareddy, S. K.; Masoodi, T.; Ghazwani, L. O.; Al-Sobhi, S. S.; Al-Dayel, F.; Al-Kuraya, K. S.	2020	Endocrine Connections	9	9	923-932	10.1530/EC-20-0258
87	Germline data no somatic data	Investigation into FOXE1 genetic variations in cutaneous squamous cell carcinoma	Venza, I.; Visalli, M.; Tripodo, B.; Lentini, M.; Teti, D.; Venza, M.	2010	British Journal of Dermatology	162	3	681-683	10.1111/j.1365-2133.2009.09557.x
88	Germline data no somatic data	The H6D genetic variation of GDF15 is associated with genesis, progress and prognosis in colorectal cancer	Wang, J.; Li, W.; Wang, Y.; Li, C.; Ding, M.; Zhang, H.; Lai, M.	2015	Pathology Research and Practice	211	11	845-850	10.1016/j.prp.2015.08.004
89	Germline data no somatic data	Prognostic Value of Germline DNA Repair Gene Mutations in De Novo Metastatic and Castrationâ€Sensitive Prostate Cancer	Wei, Yu; Wu, Junlong; Gu, Weijie; Wang, Jun; Lin, Guowen; Qin, Xiaojian; Dai, Bo; Gan, Hualei; Ye, Dingwei; Zhu, Yao	2020	Oncologist	25	7	e1042-e1050	10.1634/theoncologist.2019-0495
90	Germline data no somatic data	Over-representation of PPARÎ³ sequence variants in sporadic cases of glioblastoma multiforme: Preliminary evidence for common low penetrance modifiers for brain tumour risk in the general population	Zhou, X. P.; Black, P. M.; Yates, A. J.; Eng, C.; Smith, W. M.; Gimm, O.; Mueller, E.; Gao, X.; Sarraf, P.; Prior, T. W.; Plass, C.; Von Deimling, A.	2000	Journal of Medical Genetics	37	6	410-414
91	Germline data no somatic data	Whole-Exome Sequencing Identifies Pathogenic Germline Variants in Patients with Lynch-Like Syndrome	dos Santos, Wellington; de Andrade, Edilene Santos; Garcia, Felipe Antonio de Oliveira; Campacci, NatÃ¡lia; SÃ¡bato, Cristina da Silva; Melendez, Matias Eliseo; Reis, Rui Manuel; GalvÃ£o, Henrique de Campos Reis; Palmero, Edenir Inez	2022	Cancers	14	17	4233	10.3390/cancers14174233
92	Germline data no somatic data	Prevalence of BRCA1, BRCA2, and PALB2 genomic alterations among 924 Taiwanese breast cancer assays with tumor-only targeted sequencing: extended data analysis from the VGH-TAYLOR study.	Cheng, Han-Fang; Tsai, Yi-Fang; Liu, Chun-Yu; Hsu, Chih-Yi; Lien, Pei-Ju; Lin, Yen-Shu; Chao, Ta-Chung; Lai, Jiun- I.; Feng, Chin-Jung; Chen, Yen-Jen; Chen, Bo-Fang; Chiu, Jen-Hwey; Tseng, Ling-Ming; Huang, Chi-Cheng	2023	Breast Cancer Research	25	1		10.1186/s13058-023-01751-z
93	Germline data no somatic data	Clinical and Immunologic Characteristics of Non-Hematologic Cancers in Patients with Inborn Errors of Immunity	Delavari, Samaneh; Wang, Yating; Moeini shad, Tannaz; Pashangzadeh, Salar; Nazari, Farzad; Salami, Fereshte; Abolhassani, Hassan	2023	Cancers	15	3	764	10.3390/cancers15030764
94	Germline data no somatic data	Hereditary cancer variants and homologous recombination deficiency in biliary tract cancer	Okawa, Yuki; Iwasaki, Yusuke; Johnson, Todd A.; Ebata, Nobutaka; Inai, Chihiro; Endo, Mikiko; Maejima, Kazuhiro; Sasagawa, Shota; Fujita, Masashi; Matsuda, Koichi; Murakami, Yoshinori; Nakamura, Toru; Hirano, Satoshi; Momozawa, Yukihide; Nakagawa, Hidewaki	2023	Journal of Hepatology	78	2	333-342	10.1016/j.jhep.2022.09.025
95	Germline data no somatic data	Somatic loss of ATM is a late event in pancreatic tumorigenesis	Paranal, R. M.; Jiang, Z.; Hutchings, D.; Kryklyva, V.; Gauthier, C.; Fujikura, K.; Nanda, N.; Huang, B.; Skaro, M.; Wolfgang, C. L.; He, J.; Klimstra, D. S.; Brand, R. E.; Singhi, A. D.; DeMarzo, A.; Zheng, L.; Goggins, M.; Brosens, L. A. A.; Hruban, R. H.; Klein, A. P.; Lotan, T.; Wood, L. D.; Roberts, N. J.	2023	Journal of Pathology	260	4	455-464	10.1002/path.6136
96	Germline data no somatic data	PRDM10 RCC: A Birt-Hogg-DubÃ©-like Syndrome Associated With Lipoma and Highly Penetrant, Aggressive Renal Tumors Morphologically Resembling Type 2 Papillary Renal Cell Carcinoma	Schmidt, L. S.; Vocke, C. D.; Ricketts, C. J.; Blake, Z.; Choo, K. K.; Nielsen, D.; Gautam, R.; Crooks, D. R.; Reynolds, K. L.; Krolus, J. L.; Bashyal, M.; Karim, B.; Cowen, E. W.; Malayeri, A. A.; Merino, M. J.; Srinivasan, R.; Ball, M. W.; Zbar, B.; Marston Linehan, W.	2023	Urology	179		58-70	10.1016/j.urology.2023.04.035
1	No association between germline and somatic	Prospective Genomic Profiling of Prostate Cancer Across Disease States Reveals Germline and Somatic Alterations That May Affect Clinical Decision Making	Abida, W.; Armenia, J.; Gopalan, A.; Brennan, R.; Walsh, M.; Barron, D.; Danila, D.; Rathkopf, D.; Morris, M.; Slovin, S.; McLaughlin, B.; Curtis, K.; Hyman, D. M.; Durack, J. C.; Solomon, S. B.; Arcila, M. E.; Zehir, A.; Syed, A.; Gao, J.; Chakravarty, D.; Vargas, H. A.; Robson, M. E.; Joseph, V.; Offit, K.; Donoghue, M. T. A.; Abeshouse, A. A.; Kundra, R.; Heins, Z. J.; Penson, A. V.; Harris, C…	2017	JCO Precis Oncol	2017			10.1200/po.17.00029
2	No association between germline and somatic	Rucaparib in Men With Metastatic Castration-Resistant Prostate Cancer Harboring a BRCA1 or BRCA2 Gene Alteration	Abida, W.; Patnaik, A.; Campbell, D.; Shapiro, J.; Bryce, A. H.; McDermott, R.; Sautois, B.; Vogelzang, N. J.; Bambury, R. M.; Voog, E.; Zhang, J.; Piulats, J. M.; Ryan, C. J.; Merseburger, A. S.; Daugaard, G.; Heidenreich, A.; Fizazi, K.; Higano, C. S.; Krieger, L. E.; Sternberg, C. N.; Watkins, S. P.; Despain, D.; Simmons, A. D.; Loehr, A.; Dowson, M.; Golsorkhi, T.; Chowdhury, S.	2020	J Clin Oncol	38	32	3763-3772	10.1200/jco.20.01035
3	No association between germline and somatic	[Germline and Somatic Mutations in Archived Breast Cancer Specimens of Different Subtypes]	Abramov, I. S.; Korneva, Y. S.; Shisterova, O. A.; Ikonnikova, A. Y.; Emelyanova, M. A.; Lisitsa, T. S.; Krasnov, G. S.; Nasedkina, T. V.	2021	Mol Biol (Mosk)	55	3	412-421	10.31857/s0026898421030022
4	No association between germline and somatic	Tumor mutation burden, DNA mismatch repair status and checkpoint immunotherapy markers in primary and relapsed malignant rhabdoid tumors	Abro, B.; Kaushal, M.; Chen, L.; Wu, R.; Dehner, L. P.; Pfeifer, J. D.; He, M.	2019	Pathol Res Pract	215	6	152395	10.1016/j.prp.2019.03.023
5	No association between germline and somatic	Co-Occurring CSF3R W791* Germline and Somatic T618I Driver Mutations Induce Early CNL and Clonal Progression to Mixed Phenotype Acute Leukemia	Adam, F. C.; Szybinski, J.; Halter, J. P.; Cantoni, N.; Wenzel, F.; Leonards, K.; Brkic, S.; Passweg, J. R.; Touw, I.; Maxson, J. E.; Meyer, S. C.	2022	Curr Oncol	29	2	805-815	10.3390/curroncol29020068
6	No association between germline and somatic	Inherited and acquired variations in the hyaluronan synthase 1 (HAS1) gene may contribute to disease progression in multiple myeloma and Waldenstrom macroglobulinemia	Adamia, S.; Reichert, A. A.; Kuppusamy, H.; Kriangkum, J.; Ghosh, A.; Hodges, J. J.; Pilarski, P. M.; Treon, S. P.; Mant, M. J.; Reiman, T.; Belch, A. R.; Pilarski, L. M.	2008	Blood	112	13	5111-21	10.1182/blood-2008-02-141770
7	No association between germline and somatic	Transcriptomic silencing as a potential mechanism of treatment resistance	Adashek, J. J.; Kato, S.; Parulkar, R.; Szeto, C. W.; Sanborn, J. Z.; Vaske, C. J.; Benz, S. C.; Reddy, S. K.; Kurzrock, R.	2020	JCI Insight	5	11		10.1172/jci.insight.134824
8	No association between germline and somatic	No differences in p53 mutation frequencies between BRCA1-associated and sporadic ovarian cancers	Aghmesheh, M.; Nesland, J. M.; Kaern, J.; Dorum, A.; Edwards, L.; Byth, K.; Friedlander, M.; Jackson, P.; Tucker, K. M.; Russell, P. J.	2004	Gynecol Oncol	95	3	430-6	10.1016/j.ygyno.2004.08.035
9	No association between germline and somatic	Strategy for identification of a potential inherited leukemia predisposition in a 299 patient's cohort with tumor-only sequencing data	Aguilera-Diaz, A.; Larrayoz, M. J.; Palomino-EcheverrÃ­a, S.; Vazquez, I.; Ariceta, B.; MaÃ±Ãº, A.; Blasco-Iturri, Z.; Bernal Del Castillo, T.; Olivares Salaverri, M.; Olave Rubio, M. T.; Rifon-Roca, J.; Alfonso-Pierola, A.; Prosper, F.; Fernandez-Mercado, M.; Calasanz, M. J.	2020	Leuk Res	95		106386	10.1016/j.leukres.2020.106386
10	No association between germline and somatic	Somatic molecular changes and histo-pathological features of colorectal cancer in Tunisia	Aissi, S.; Buisine, M. P.; Zerimech, F.; Kourda, N.; Moussa, A.; Manai, M.; Porchet, N.	2013	World J Gastroenterol	19	32	5286-94	10.3748/wjg.v19.i32.5286
11	No association between germline and somatic	Identification and characterization of a novel MLH1 genomic rearrangement as the cause of HNPCC in a Tunisian family: evidence for a homologous Alu-mediated recombination	Aissi-Ben Moussa, S.; Moussa, A.; Lovecchio, T.; Kourda, N.; Najjar, T.; Ben Jilani, S.; El Gaaied, A.; Porchet, N.; Manai, M.; Buisine, M. P.	2009	Fam Cancer	8	2	119-26	10.1007/s10689-008-9215-7
12	No association between germline and somatic	Somatic mutations at the SRD5A2 locus encoding prostatic steroid 5alpha-reductase during prostate cancer progression	Akalu, A.; Dlmajian, D. A.; Highshaw, R. A.; Nichols, P. W.; Reichardt, J. K.	1999	J Urol	161	4	1355-8
13	No association between germline and somatic	Infrequent frameshift mutations in the simple repeat sequences of hMLH3 in hereditary nonpolyposis colorectal cancers	Akiyama, Y.; Nagasaki, H.; Nakajima, T.; Sakai, H.; Nomizu, T.; Yuasa, Y.	2001	Jpn J Clin Oncol	31	2	61-4	10.1093/jjco/hye010
14	No association between germline and somatic	Germ-line mutation of the hMSH6/GTBP gene in an atypical hereditary nonpolyposis colorectal cancer kindred	Akiyama, Y.; Sato, H.; Yamada, T.; Nagasaki, H.; Tsuchiya, A.; Abe, R.; Yuasa, Y.	1997	Cancer Res	57	18	3920-3
15	No association between germline and somatic	Frequent somatic mutations of hMSH3 with reference to microsatellite instability in hereditary nonpolyposis colorectal cancers	Akiyama, Y.; Tsubouchi, N.; Yuasa, Y.	1997	Biochem Biophys Res Commun	236	2	248-52	10.1006/bbrc.1997.6942
16	No association between germline and somatic	Inherited variants of MYH associated with somatic G:C-->T:A mutations in colorectal tumors	Al-Tassan, N.; Chmiel, N. H.; Maynard, J.; Fleming, N.; Livingston, A. L.; Williams, G. T.; Hodges, A. K.; Davies, D. R.; David, S. S.; Sampson, J. R.; Cheadle, J. P.	2002	Nat Genet	30	2	227-32	10.1038/ng828
17	No association between germline and somatic	BAP1 mutation is a frequent somatic event in peritoneal malignant mesothelioma	Alakus, H.; Yost, S. E.; Woo, B.; French, R.; Lin, G. Y.; Jepsen, K.; Frazer, K. A.; Lowy, A. M.; Harismendy, O.	2015	J Transl Med	13		122	10.1186/s12967-015-0485-1
18	No association between germline and somatic	Spectrum of gross deletions and insertions in the RB1 gene in patients with retinoblastoma and association with phenotypic expression	Albrecht, P.; Ansperger-Rescher, B.; SchÃ¼ler, A.; Zeschnigk, M.; Gallie, B.; Lohmann, D. R.	2005	Hum Mutat	26	5	437-45	10.1002/humu.20234
19	No association between germline and somatic	Cabazitaxel activity in men with metastatic castration-resistant prostate cancer with and without DNA damage repair defects	Aldea, M.; Lam, L.; Orillard, E.; Llacer Perez, C.; Saint-Ghislain, M.; Gravis, G.; FlÃ©chon, A.; Roubaud, G.; Barthelemy, P.; Ricci, F.; Priou, F.; Neviere, Z.; Beaufils, M.; Laguerre, B.; Hardy, A. C.; Helissey, C.; Ratta, R.; Borchiellini, D.; Pobel, C.; Joly, F.; Castro, E.; Thiery-Vuillemin, A.; Baciarello, G.; Fizazi, K.	2021	Eur J Cancer	159		87-97	10.1016/j.ejca.2021.09.029
20	No association between germline and somatic	Unregulated smooth-muscle myosin in human intestinal neoplasia	Alhopuro, P.; Phichith, D.; Tuupanen, S.; Sammalkorpi, H.; Nybondas, M.; Saharinen, J.; Robinson, J. P.; Yang, Z.; Chen, L. Q.; Orntoft, T.; Mecklin, J. P.; JÃ¤rvinen, H.; Eng, C.; Moeslein, G.; Shibata, D.; Houlston, R. S.; Lucassen, A.; Tomlinson, I. P.; Launonen, V.; RistimÃ¤ki, A.; Arango, D.; Karhu, A.; Sweeney, H. L.; Aaltonen, L. A.	2008	Proc Natl Acad Sci U S A	105	14	5513-8	10.1073/pnas.0801213105
21	No association between germline and somatic	BRCA mutation frequency and patterns of treatment response in BRCA mutation-positive women with ovarian cancer: a report from the Australian Ovarian Cancer Study Group	Alsop, K.; Fereday, S.; Meldrum, C.; deFazio, A.; Emmanuel, C.; George, J.; Dobrovic, A.; Birrer, M. J.; Webb, P. M.; Stewart, C.; Friedlander, M.; Fox, S.; Bowtell, D.; Mitchell, G.	2012	J Clin Oncol	30	21	2654-63	10.1200/jco.2011.39.8545
22	No association between germline and somatic	Germline PMS2 and somatic POLE exonuclease mutations cause hypermutability of the leading DNA strand in biallelic mismatch repair deficiency syndrome brain tumours	Andrianova, M. A.; Chetan, G. K.; Sibin, M. K.; McKee, T.; Merkler, D.; Narasinga, R. K.; Ribaux, P.; Blouin, J. L.; Makrythanasis, P.; Seplyarskiy, V. B.; Antonarakis, S. E.; Nikolaev, S. I.	2017	J Pathol	243	3	331-341	10.1002/path.4957
23	No association between germline and somatic	High tumor mutational burden and T-cell activation are associated with long-term response to anti-PD1 therapy in Lynch syndrome recurrent glioblastoma patient	Anghileri, E.; Di Ianni, N.; Paterra, R.; Langella, T.; Zhao, J.; Eoli, M.; PatanÃ¨, M.; Pollo, B.; Cuccarini, V.; Iavarone, A.; Rabadan, R.; Finocchiaro, G.; Pellegatta, S.	2021	Cancer Immunol Immunother	70	3	831-842	10.1007/s00262-020-02769-4
24	No association between germline and somatic	Whole-genome analysis of Nigerian patients with breast cancer reveals ethnic-driven somatic evolution and distinct genomic subtypes	Ansari-Pour, N.; Zheng, Y.; Yoshimatsu, T. F.; Sanni, A.; Ajani, M.; Reynier, J. B.; Tapinos, A.; Pitt, J. J.; Dentro, S.; Woodard, A.; Rajagopal, P. S.; Fitzgerald, D.; Gruber, A. J.; Odetunde, A.; Popoola, A.; Falusi, A. G.; Babalola, C. P.; Ogundiran, T.; Ibrahim, N.; Barretina, J.; Van Loo, P.; Chen, M.; White, K. P.; Ojengbede, O.; Obafunwa, J.; Huo, D.; Wedge, D. C.; Olopade, O. I.	2021	Nat Commun	12	1	6946	10.1038/s41467-021-27079-w
25	No association between germline and somatic	Personalized HLA typing leads to the discovery of novel HLA alleles and tumor-specific HLA variants	Anzar, I.; Sverchkova, A.; Samarakoon, P.; Ellingsen, E. B.; Gaudernack, G.; Stratford, R.; Clancy, T.	2022	Hla	99	4	313-327	10.1111/tan.14562
26	No association between germline and somatic	DICER1 screening in 15 paediatric paratesticular sarcomas unveils an unusual DICER1-associated sarcoma	Apellaniz-Ruiz, M.; Cullinan, N.; Grant, R.; Marrano, P.; Priest, J. R.; Thorner, P. S.; Goudie, C.; Foulkes, W. D.	2020	J Pathol Clin Res	6	3	185-194	10.1002/cjp2.164
27	No association between germline and somatic	Transcriptome Patterns of BRCA1- and BRCA2- Mutated Breast and Ovarian Cancers	Arakelyan, A.; Melkonyan, A.; Hakobyan, S.; Boyarskih, U.; Simonyan, A.; Nersisyan, L.; Nikoghosyan, M.; Filipenko, M.; Binder, H.	2021	Int J Mol Sci	22	3		10.3390/ijms22031266
28	No association between germline and somatic	Analysis of somatic mutations at human minisatellite loci in tumors and cell lines	Armour, J. A.; Patel, I.; Thein, S. L.; Fey, M. F.; Jeffreys, A. J.	1989	Genomics	4	3	328-34	10.1016/0888-7543(89)90338-8
29	No association between germline and somatic	A unique subset of low-risk Wilms tumors is characterized by loss of function of TRIM28 (KAP1), a gene critical in early renal development: A Children's Oncology Group study	Armstrong, A. E.; Gadd, S.; Huff, V.; Gerhard, D. S.; Dome, J. S.; Perlman, E. J.	2018	PLoS One	13	12	e0208936	10.1371/journal.pone.0208936
30	No association between germline and somatic	APC promoter hypermethylation contributes to the loss of APC expression in colorectal cancers with allelic loss on 5q	Arnold, C. N.; Goel, A.; Niedzwiecki, D.; Dowell, J. M.; Wasserman, L.; Compton, C.; Mayer, R. J.; Bertagnolli, M. M.; Boland, C. R.	2004	Cancer Biol Ther	3	10	960-4	10.4161/cbt.3.10.1113
31	No association between germline and somatic	Frequency of germline genomic homozygosity associated with cancer cases	AssiÃ©, G.; LaFramboise, T.; Platzer, P.; Eng, C.	2008	Jama	299	12	1437-45	10.1001/jama.299.12.1437
32	No association between germline and somatic	Mutational analysis of the BRCA2 gene in breast carcinoma patients of Kashmiri descent	Ayub, S. G.; Rasool, S.; Ayub, T.; Khan, S. N.; Wani, K. A.; Andrabi, K. I.	2014	Mol Med Rep	9	2	749-53	10.3892/mmr.2013.1862
33	No association between germline and somatic	Prevalence of BRCA1 and BRCA2 pathogenic sequence variants in ovarian cancer patients in the Gulf region: the PREDICT study	Azribi, F.; Abdou, E.; Dawoud, E.; Ashour, M.; Kamal, A.; Al Sayed, M.; Burney, I.	2021	BMC Cancer	21	1	1350	10.1186/s12885-021-09094-8
34	No association between germline and somatic	Tumor microsatellite instability in early onset gastric cancer	Bacani, J.; Zwingerman, R.; Di Nicola, N.; Spencer, S.; Wegrynowski, T.; Mitchell, K.; Hay, K.; Redston, M.; Holowaty, E.; Huntsman, D.; Pollett, A.; Riddell, R.; Gallinger, S.	2005	J Mol Diagn	7	4	465-77	10.1016/s1525-1578(10)60577-6
35	No association between germline and somatic	Distinctive phenotypes in two children with novel germline RUNX1 mutations - one with myeloid malignancy and increased fetal hemoglobin	Bagla, S.; Regling, K. A.; Wakeling, E. N.; Gadgeel, M.; Buck, S.; Zaidi, A. U.; Flore, L. A.; Chicka, M.; Schiffer, C. A.; Chitlur, M. B.; Ravindranath, Y.	2021	Pediatr Hematol Oncol	38	1	65-79	10.1080/08880018.2020.1814463
36	No association between germline and somatic	DICER1 Mutations in the Era of Expanding Integrative Clinical Sequencing in Pediatric Oncology	Bailey, K. M.; Jacobs, M. F.; Anderson, B.; Rabah, R.; Wu, Y. M.; Else, T.; Mody, R. J.	2019	JCO Precis Oncol	3			10.1200/po.18.00172
37	No association between germline and somatic	Novel somatic and germline mutations in cancer candidate genes in glioblastoma, melanoma, and pancreatic carcinoma	Balakrishnan, A.; Bleeker, F. E.; Lamba, S.; Rodolfo, M.; Daniotti, M.; Scarpa, A.; van Tilborg, A. A.; Leenstra, S.; Zanon, C.; Bardelli, A.	2007	Cancer Res	67	8	3545-50	10.1158/0008-5472.Can-07-0065
38	No association between germline and somatic	Pharmacogenetic analysis in neoadjuvant chemoradiation for rectal cancer: high incidence of somatic mutations and their relation with response	Balboa, E.; Duran, G.; Lamas, M. J.; Gomez-CaamaÃ±o, A.; Celeiro-MuÃ±oz, C.; Lopez, R.; Carracedo, A.; Barros, F.	2010	Pharmacogenomics	11	6	747-61	10.2217/pgs.10.51
39	No association between germline and somatic	Microsatellite instability and mutation analysis of candidate genes in unselected sardinian patients with endometrial carcinoma	Baldinu, P.; Cossu, A.; Manca, A.; Satta, M. P.; Pisano, M.; Casula, M.; Dessole, S.; Pintus, A.; Tanda, F.; Palmieri, G.	2002	Cancer	94	12	3157-68	10.1002/cncr.10606
40	No association between germline and somatic	Constitutional and somatic RB1 mutation spectrum in nonfamilial unilateral and bilateral retinoblastoma in India	Bamne, M. N.; Ghule, P. N.; Jose, J.; Banavali, S. D.; Kurkure, P. A.; Amare Kadam, P. S.	2005	Genet Test	9	3	200-11	10.1089/gte.2005.9.200
41	No association between germline and somatic	Mechanisms and sequelae of E-cadherin silencing in hereditary diffuse gastric cancer	Barber, M.; Murrell, A.; Ito, Y.; Maia, A. T.; Hyland, S.; Oliveira, C.; Save, V.; Carneiro, F.; Paterson, A. L.; Grehan, N.; Dwerryhouse, S.; Lao-Sirieix, P.; Caldas, C.; Fitzgerald, R. C.	2008	J Pathol	216	3	295-306	10.1002/path.2426
42	No association between germline and somatic	Monoallelic deleterious MUTYH germline variants as a driver for tumorigenesis	Barreiro, R. A. S.; Sabbaga, J.; Rossi, B. M.; Achatz, M. I. W.; Bettoni, F.; Camargo, A. A.; Asprino, P. F.; A. F. Galante P	2022	J Pathol	256	2	214-222	10.1002/path.5829
43	No association between germline and somatic	Germline GPR161 Mutations Predispose to Pediatric Medulloblastoma	Begemann, M.; Waszak, S. M.; Robinson, G. W.; JÃ¤ger, N.; Sharma, T.; Knopp, C.; Kraft, F.; Moser, O.; Mynarek, M.; Guerrini-Rousseau, L.; Brugieres, L.; Varlet, P.; Pietsch, T.; Bowers, D. C.; Chintagumpala, M.; Sahm, F.; Korbel, J. O.; Rutkowski, S.; Eggermann, T.; Gajjar, A.; Northcott, P.; Elbracht, M.; Pfister, S. M.; Kontny, U.; Kurth, I.	2020	J Clin Oncol	38	1	43-50	10.1200/jco.19.00577
44	No association between germline and somatic	Germline and somatic mosaicism in a family with multiple endocrine neoplasia type 1 (MEN1) syndrome	Beijers, Hjbh; Stikkelbroeck, N. M. L.; Mensenkamp, A. R.; Pfundt, R.; van der Luijt, R. B.; Timmers, Hjlm; Hermus, Armm; Kempers, M. J. E.	2019	Eur J Endocrinol	180	2	K15-k19	10.1530/eje-18-0778
45	No association between germline and somatic	Overexpression of insulin-like growth factor 1 receptor and frequent mutational inactivation of SDHA in wild-type SDHB-negative gastrointestinal stromal tumors	Belinsky, M. G.; Rink, L.; Flieder, D. B.; Jahromi, M. S.; Schiffman, J. D.; Godwin, A. K.; von Mehren, M.	2013	Genes Chromosomes Cancer	52	2	214-24	10.1002/gcc.22023
46	No association between germline and somatic	Study of chromatin remodeling genes implicates SMARCA4 as a putative player in oncogenesis in neuroblastoma	Bellini, A.; Bessoltane-Bentahar, N.; Bhalshankar, J.; Clement, N.; Raynal, V.; Baulande, S.; Bernard, V.; Danzon, A.; Chicard, M.; Colmet-Daage, L.; Pierron, G.; Le Roux, L.; Planchon, J. M.; Combaret, V.; Lapouble, E.; Corradini, N.; Thebaud, E.; Gambart, M.; Valteau-Couanet, D.; Michon, J.; Louis-Brennetot, C.; Janoueix-Lerosey, I.; Defachelles, A. S.; Bourdeaut, F.; Delattre, O.; Schleiermach…	2019	Int J Cancer	145	10	2781-2791	10.1002/ijc.32361
47	No association between germline and somatic	Targeted next-generation sequencing detects rare genetic events in pheochromocytoma and paraganglioma	Ben Aim, L.; Pigny, P.; Castro-Vega, L. J.; Buffet, A.; Amar, L.; Bertherat, J.; Drui, D.; Guilhem, I.; Baudin, E.; Lussey-Lepoutre, C.; Corsini, C.; Chabrier, G.; Briet, C.; Faivre, L.; Cardot-Bauters, C.; Favier, J.; Gimenez-Roqueplo, A. P.; Burnichon, N.	2019	J Med Genet	56	8	513-520	10.1136/jmedgenet-2018-105714
48	No association between germline and somatic	Targeted next generation sequencing screening of Lynch syndrome in Tunisian population	Ben Sghaier, R.; Jansen, A. M. L.; Bdioui, A.; Van Wezel, T.; Ksiaa, M.; Elgolli, L.; Ben Fatma, L.; Ben Ahmed, S.; Azzouz, M. M.; Hellara, O.; Elghali, A.; Darbel, F.; Skandrani, K.; Mokkni, M.; Gdissa, A.; Ltaief, R.; Saad, A.; Hmila, F.; Gribaa, M.; Morreau, H.	2019	Fam Cancer	18	3	343-348	10.1007/s10689-019-00130-y
49	No association between germline and somatic	Novel succinate dehydrogenase subunit B (SDHB) mutations in familial phaeochromocytomas and paragangliomas, but an absence of somatic SDHB mutations in sporadic phaeochromocytomas	Benn, D. E.; Croxson, M. S.; Tucker, K.; Bambach, C. P.; Richardson, A. L.; Delbridge, L.; Pullan, P. T.; Hammond, J.; Marsh, D. J.; Robinson, B. G.	2003	Oncogene	22	9	1358-64	10.1038/sj.onc.1206300
50	No association between germline and somatic	Sporadic and familial pheochromocytomas are associated with loss of at least two discrete intervals on chromosome 1p	Benn, D. E.; Dwight, T.; Richardson, A. L.; Delbridge, L.; Bambach, C. P.; Stowasser, M.; Gordon, R. D.; Marsh, D. J.; Robinson, B. G.	2000	Cancer Res	60	24	7048-51
51	No association between germline and somatic	Frequency of germline and somatic BRCA1 mutations in ovarian cancer	Berchuck, A.; Heron, K. A.; Carney, M. E.; Lancaster, J. M.; Fraser, E. G.; Vinson, V. L.; Deffenbaugh, A. M.; Miron, A.; Marks, J. R.; Futreal, P. A.; Frank, T. S.	1998	Clin Cancer Res	4	10	2433-7
52	No association between germline and somatic	Identification and characterization of retinoblastoma gene mutations disturbing apoptosis in human breast cancers	Berge, E. O.; Knappskog, S.; Geisler, S.; Staalesen, V.; Pacal, M.; BÃ¸rresen-Dale, A. L.; Puntervoll, P.; Lillehaug, J. R.; LÃ¸nning, P. E.	2010	Mol Cancer	9		173	10.1186/1476-4598-9-173
53	No association between germline and somatic	Screening for germline mutations of MLH1, MSH2, MSH6 and PMS2 genes in Slovenian colorectal cancer patients: implications for a population specific detection strategy of Lynch syndrome	Berginc, G.; Bracko, M.; Ravnik-Glavac, M.; Glavac, D.	2009	Fam Cancer	8	4	421-9	10.1007/s10689-009-9258-4
54	No association between germline and somatic	Clinical characteristics and outcomes of patients with BRCA1 or RAD51C methylated versus mutated ovarian carcinoma	Bernards, S. S.; Pennington, K. P.; Harrell, M. I.; Agnew, K. J.; Garcia, R. L.; Norquist, B. M.; Swisher, E. M.	2018	Gynecol Oncol	148	2	281-285	10.1016/j.ygyno.2017.12.004
55	No association between germline and somatic	High frequency of pathogenic germline variants within homologous recombination repair in patients with advanced cancer	Bertelsen, B.; Tuxen, I. V.; Yde, C. W.; Gabrielaite, M.; Torp, M. H.; Kinalis, S.; Oestrup, O.; Rohrberg, K.; Spangaard, I.; Santoni-Rugiu, E.; Wadt, K.; Mau-Sorensen, M.; Lassen, U.; Nielsen, F. C.	2019	NPJ Genom Med	4		13	10.1038/s41525-019-0087-6
56	No association between germline and somatic	A common region of loss of heterozygosity in Wilms' tumor and embryonal rhabdomyosarcoma distal to the D11S988 locus on chromosome 11p15.5	Besnard-GuÃ©rin, C.; Newsham, I.; Winqvist, R.; Cavenee, W. K.	1996	Hum Genet	97	2	163-70	10.1007/bf02265259
57	No association between germline and somatic	A prospective, multicenter, population-based study of BRAF mutational analysis for Lynch syndrome screening	Bessa, X.; BallestÃ©, B.; Andreu, M.; Castells, A.; Bellosillo, B.; Balaguer, F.; CastellvÃ­-Bel, S.; Paya, A.; Jover, R.; Alenda, C.; TitÃ³, L.; Martinez-Villacampa, M.; Vilella, A.; Xicola, R. M.; Pons, E.; Llor, X.	2008	Clin Gastroenterol Hepatol	6	2	206-14	10.1016/j.cgh.2007.10.011
58	No association between germline and somatic	Genomic and transcriptomic heterogeneity of colorectal tumours arising in Lynch syndrome	Binder, H.; Hopp, L.; Schweiger, M. R.; Hoffmann, S.; JÃ¼hling, F.; Kerick, M.; Timmermann, B.; Siebert, S.; Grimm, C.; Nersisyan, L.; Arakelyan, A.; Herberg, M.; Buske, P.; Loeffler-Wirth, H.; Rosolowski, M.; Engel, C.; Przybilla, J.; Peifer, M.; Friedrichs, N.; Moeslein, G.; Odenthal, M.; Hussong, M.; Peters, S.; Holzapfel, S.; Nattermann, J.; Hueneburg, R.; Schmiegel, W.; Royer-Pokora, B.; Are…	2017	J Pathol	243	2	242-254	10.1002/path.4948
59	No association between germline and somatic	Tumor mutation burden forecasts outcome in ovarian cancer with BRCA1 or BRCA2 mutations	Birkbak, N. J.; Kochupurakkal, B.; Izarzugaza, J. M.; Eklund, A. C.; Li, Y.; Liu, J.; Szallasi, Z.; Matulonis, U. A.; Richardson, A. L.; Iglehart, J. D.; Wang, Z. C.	2013	PLoS One	8	11	e80023	10.1371/journal.pone.0080023
60	No association between germline and somatic	Analysis of somatic APC mutations in rare extracolonic tumors of patients with familial adenomatous polyposis coli	BlÃ¤ker, H.; Sutter, C.; Kadmon, M.; Otto, H. F.; Von Knebel-Doeberitz, M.; Gebert, J.; Helmke, B. M.	2004	Genes Chromosomes Cancer	41	2	93-8	10.1002/gcc.20071
61	No association between germline and somatic	Effects of germline and somatic events in candidate BRCA-like genes on breast-tumor signatures	Bodily, W. R.; Shirts, B. H.; Walsh, T.; Gulsuner, S.; King, M. C.; Parker, A.; Roosan, M.; Piccolo, S. R.	2020	PLoS One	15	9	e0239197	10.1371/journal.pone.0239197
62	No association between germline and somatic	Germ-line GATA2 p.THR354MET mutation in familial myelodysplastic syndrome with acquired monosomy 7 and ASXL1 mutation demonstrating rapid onset and poor survival	BÃ¶dÃ¶r, C.; Renneville, A.; Smith, M.; Charazac, A.; Iqbal, S.; Etancelin, P.; Cavenagh, J.; Barnett, M. J.; KramarzovÃ¡, K.; Krishnan, B.; Matolcsy, A.; Preudhomme, C.; Fitzgibbon, J.; Owen, C.	2012	Haematologica	97	6	890-4	10.3324/haematol.2011.054361
63	No association between germline and somatic	Racial diversity of actionable mutations in non-small cell lung cancer	Bollig-Fischer, A.; Chen, W.; Gadgeel, S. M.; Wenzlaff, A. S.; Cote, M. L.; Schwartz, A. G.; Bepler, G.	2015	J Thorac Oncol	10	2	250-5	10.1097/jto.0000000000000420
64	No association between germline and somatic	Loss of ARID1A expression and its relationship with PI3K-Akt pathway alterations, TP53 and microsatellite instability in endometrial cancer	Bosse, T.; ter Haar, N. T.; Seeber, L. M.; v Diest, P. J.; Hes, F. J.; Vasen, H. F.; Nout, R. A.; Creutzberg, C. L.; Morreau, H.; Smit, V. T.	2013	Mod Pathol	26	11	1525-35	10.1038/modpathol.2013.96
65	No association between germline and somatic	Somatic mutation of MutYH in Tunisian patients with sporadic colorectal cancer	Bougatef, K.; Marrakchi, R.; Kourda, N.; Ben Lahely, Y. B.; Jileni, S. B.; El Khil, H. K.; Soubrier, F.; Ben Ammar Elgaaied, A.	2007	J Clin Lab Anal	21	6	372-4	10.1002/jcla.20198
66	No association between germline and somatic	Candidate predisposing germline copy number variants in early onset colorectal cancer patients	Brea-Fernandez, A. J.; Fernandez-Rozadilla, C.; Alvarez-Barona, M.; Azuara, D.; Ginesta, M. M.; Clofent, J.; de Castro, L.; Gonzalez, D.; Andreu, M.; Bessa, X.; Llor, X.; Xicola, R.; Jover, R.; Castells, A.; Castellvi-Bel, S.; Capella, G.; Carracedo, A.; Ruiz-Ponte, C.	2017	Clin Transl Oncol	19	5	625-632	10.1007/s12094-016-1576-z
67	No association between germline and somatic	Comprehensive Genomic and Transcriptomic Analysis of Three Synchronous Primary Tumours and a Recurrence from a Head and Neck Cancer Patient	Bresadola, L.; Weber, D.; Ritzel, C.; LÃ¶wer, M.; Bukur, V.; Akilli-Ã–ztÃ¼rk, Ã–; Becker, J.; Mehanna, H.; SchrÃ¶rs, B.; Vascotto, F.; Sahin, U.; Kong, A.	2021	Int J Mol Sci	22	14		10.3390/ijms22147583
68	No association between germline and somatic	BRCA1 deficiency is a recurrent event in early-onset triple-negative breast cancer: a comprehensive analysis of germline mutations and somatic promoter methylation	Brianese, R. C.; Nakamura, K. D. M.; Almeida, Fgdsr; Ramalho, R. F.; Barros, B. D. F.; Ferreira, E. N. E.; Formiga, Mndc; de Andrade, V. P.; de Lima, V. C. C.; Carraro, D. M.	2018	Breast Cancer Res Treat	167	3	803-814	10.1007/s10549-017-4552-6
69	No association between germline and somatic	Cerebellar liponeurocytoma: clinical, histopathological and molecular features of a series of three cases, including one recurrent tumor	Broggi, G.; TirrÃ², E.; Alzoubi, H.; Arcella, A.; Gianno, F.; Antonelli, M.; Minasi, S.; Vigneri, P.; Certo, F.; Altieri, R.; Barbagallo, G. M. V.; Miele, E.; Caltabiano, R.; Giangaspero, F.	2022	Neuropathology	42	3	169-180	10.1111/neup.12799
70	No association between germline and somatic	Combining molecular and immunohistochemical analyses of key drivers in primary melanomas: interplay between germline and somatic variations	Bruno, W.; Martinuzzi, C.; Dalmasso, B.; Andreotti, V.; Pastorino, L.; Cabiddu, F.; Gualco, M.; Spagnolo, F.; Ballestrero, A.; Queirolo, P.; Grillo, F.; Mastracci, L.; Ghiorzo, P.	2018	Oncotarget	9	5	5691-5702	10.18632/oncotarget.23204
71	No association between germline and somatic	Tumor testing to identify lynch syndrome in two Australian colorectal cancer cohorts	Buchanan, D. D.; Clendenning, M.; Rosty, C.; Eriksen, S. V.; Walsh, M. D.; Walters, R. J.; Thibodeau, S. N.; Stewart, J.; Preston, S.; Win, A. K.; Flander, L.; Ouakrim, D. A.; Macrae, F. A.; Boussioutas, A.; Winship, I. M.; Giles, G. G.; Hopper, J. L.; Southey, M. C.; English, D.; Jenkins, M. A.	2017	J Gastroenterol Hepatol	32	2	427-438	10.1111/jgh.13468
72	No association between germline and somatic	Somatic variants of potential clinical significance in the tumors of BRCA phenocopies	Buckingham, L.; Mitchell, R.; Maienschein-Cline, M.; Green, S.; Hu, V. H.; Cobleigh, M.; Rotmensch, J.; Burgess, K.; Usha, L.	2019	Hered Cancer Clin Pract	17		21	10.1186/s13053-019-0117-5
73	No association between germline and somatic	Mosaicism in HIF2A-related polycythemia-paraganglioma syndrome	Buffet, A.; Smati, S.; Mansuy, L.; MÃ©nara, M.; Lebras, M.; Heymann, M. F.; Simian, C.; Favier, J.; Murat, A.; Cariou, B.; Gimenez-Roqueplo, A. P.	2014	J Clin Endocrinol Metab	99	2	E369-73	10.1210/jc.2013-2600
74	No association between germline and somatic	Germline DLST Variants Promote Epigenetic Modifications in Pheochromocytoma-Paraganglioma	Buffet, A.; Zhang, J.; Rebel, H.; Corssmit, E. P. M.; Jansen, J. C.; Hensen, E. F.; BovÃ©e, Jvmg; Morini, A.; Gimenez-Roqueplo, A. P.; Hes, F. J.; Devilee, P.; Favier, J.; Bayley, J. P.	2021	J Clin Endocrinol Metab	106	2	459-471	10.1210/clinem/dgaa819
75	No association between germline and somatic	TIRAP p.R81C is a novel lymphoma risk variant which enhances cell proliferation via NF-ÎºB mediated signaling in B-cells	Burkhard, R.; Keller, I.; Arambasic, M.; Juskevicius, D.; Tzankov, A.; Lundberg, P.; Bruggmann, R.; Dirnhofer, S.; Radpour, R.; Novak, U.	2019	Haematologica	104	4	766-777	10.3324/haematol.2018.201590
76	No association between germline and somatic	MAX mutations cause hereditary and sporadic pheochromocytoma and paraganglioma	Burnichon, N.; CascÃ³n, A.; Schiavi, F.; Morales, N. P.; Comino-MÃ©ndez, I.; Abermil, N.; Inglada-PÃ©rez, L.; de Cubas, A. A.; Amar, L.; Barontini, M.; de QuirÃ³s, S. B.; Bertherat, J.; Bignon, Y. J.; Blok, M. J.; Bobisse, S.; Borrego, S.; Castellano, M.; Chanson, P.; Chiara, M. D.; Corssmit, E. P.; GiacchÃ¨, M.; de Krijger, R. R.; Ercolino, T.; Girerd, X.; GÃ³mez-GarcÃ­a, E. B.; GÃ³mez-GraÃ±a, A…	2012	Clin Cancer Res	18	10	2828-37	10.1158/1078-0432.Ccr-12-0160
77	No association between germline and somatic	Integrative genomic analysis reveals somatic mutations in pheochromocytoma and paraganglioma	Burnichon, N.; Vescovo, L.; Amar, L.; LibÃ©, R.; de Reynies, A.; Venisse, A.; Jouanno, E.; Laurendeau, I.; Parfait, B.; Bertherat, J.; Plouin, P. F.; Jeunemaitre, X.; Favier, J.; Gimenez-Roqueplo, A. P.	2011	Hum Mol Genet	20	20	3974-85	10.1093/hmg/ddr324
78	No association between germline and somatic	Identification and Management of Pathogenic Variants in BRCA1, BRCA2, and PALB2 in a Tumor-Only Genomic Testing Program	Bychkovsky, B. L.; Li, T.; Sotelo, J.; Tayob, N.; Mercado, J.; Gomy, I.; Chittenden, A.; Kane, S.; Stokes, S.; Hughes, M. E.; Kim, J. S.; Umeton, R.; Awad, M. M.; Konstantinopoulos, P. A.; Yurgelun, M. B.; Wolpin, B. M.; Taplin, M. E.; Newmark, R. E.; Johnson, B. E.; Lindeman, N. I.; MacConaill, L. E.; Garber, J. E.; Lin, N. U.	2022	Clin Cancer Res	28	11	2349-2360	10.1158/1078-0432.Ccr-21-2861
79	No association between germline and somatic	Exome sequencing reveals mutant genes with low penetrance involved in MEN2A-associated tumorigenesis	Cai, J.; Li, L.; Ye, L.; Jiang, X.; Shen, L.; Gao, Z.; Fang, W.; Huang, F.; Su, T.; Zhou, Y.; Wang, W.; Ning, G.	2015	Endocr Relat Cancer	22	1	23-33	10.1530/erc-14-0225
80	No association between germline and somatic	Multimorbidity and Genetic Characteristics of DICER1 Syndrome Based on Systematic Review	Cai, S.; Zhao, W.; Nie, X.; Abbas, A.; Fu, L.; Bihi, S.; Feng, G.; Liu, T.; Lv, Y.; Ma, X.; Peng, X.	2017	J Pediatr Hematol Oncol	39	5	355-361	10.1097/mph.0000000000000715
81	No association between germline and somatic	Tumor and germline next generation sequencing in high grade serous cancer: experience from a large population-based testing program	Care, M.; McCuaig, J.; Clarke, B.; Grenier, S.; Kim, R. H.; Rouzbahman, M.; Stickle, N.; Bernardini, M.; Stockley, T. L.	2021	Mol Oncol	15	1	80-90	10.1002/1878-0261.12817
82	No association between germline and somatic	Impact of mutations in homologous recombination repair genes on treatment outcomes for metastatic castration resistant prostate cancer	Carlson, A. S.; Acevedo, R. I.; Lim, D. M.; Gulati, R.; Gawne, A.; Sokolova, A. O.; Cheng, H. H.; Nelson, P. S.; Montgomery, R. B.; Yu, E. Y.; Schweizer, M. T.	2020	PLoS One	15	9	e0239686	10.1371/journal.pone.0239686
83	No association between germline and somatic	HPV nonrelated endocervical adenocarcinoma in hereditary cancer syndromes	Carnevali, I.; Di Lauro, E.; Pensotti, V.; Sahnane, N.; Leoni, E.; Formenti, G.; Ghezzi, F.; Sessa, F.; Tibiletti, M. G.	2020	Tumori	106	6	Np67-np72	10.1177/0300891620936752
84	No association between germline and somatic	Strategies for Lynch syndrome identification in selected and unselected gynecological cancers	Carnevali, I.; Sahnane, N.; Chiaravalli, A. M.; Di Lauro, E.; Facco, C.; Facchi, S.; Casarin, J.; Ghezzi, F.; Sessa, F.; Tibiletti, M. G.	2022	Eur J Cancer Prev	31	4	369-376	10.1097/cej.0000000000000711
85	No association between germline and somatic	HRPT2, encoding parafibromin, is mutated in hyperparathyroidism-jaw tumor syndrome	Carpten, J. D.; Robbins, C. M.; Villablanca, A.; Forsberg, L.; Presciuttini, S.; Bailey-Wilson, J.; Simonds, W. F.; Gillanders, E. M.; Kennedy, A. M.; Chen, J. D.; Agarwal, S. K.; Sood, R.; Jones, M. P.; Moses, T. Y.; Haven, C.; Petillo, D.; Leotlela, P. D.; Harding, B.; Cameron, D.; Pannett, A. A.; HÃ¶Ã¶g, A.; Heath, H., 3rd; James-Newton, L. A.; Robinson, B.; Zarbo, R. J.; Cavaco, B. M.; Wassif…	2002	Nat Genet	32	4	676-80	10.1038/ng1048
86	No association between germline and somatic	Interaction Landscape of Inherited Polymorphisms with Somatic Events in Cancer	Carter, H.; Marty, R.; Hofree, M.; Gross, A. M.; Jensen, J.; Fisch, K. M.; Wu, X.; DeBoever, C.; Van Nostrand, E. L.; Song, Y.; Wheeler, E.; Kreisberg, J. F.; Lippman, S. M.; Yeo, G. W.; Gutkind, J. S.; Ideker, T.	2017	Cancer Discov	7	4	410-423	10.1158/2159-8290.Cd-16-1045
87	No association between germline and somatic	Redefinition of familial intestinal gastric cancer: clinical and genetic perspectives	Carvalho, J.; Oliveira, P.; Senz, J.; SÃ£o JosÃ©, C.; Hansford, S.; Teles, S. P.; Ferreira, M.; Corso, G.; Pinheiro, H.; Lemos, D.; Pascale, V.; Roviello, F.; Huntsman, D.; Oliveira, C.	2021	J Med Genet	58	1	2025-01-11	10.1136/jmedgenet-2019-106346
88	No association between germline and somatic	Clonal evolution of high-grade serous ovarian carcinoma from primary to recurrent disease	Castellarin, M.; Milne, K.; Zeng, T.; Tse, K.; Mayo, M.; Zhao, Y.; Webb, J. R.; Watson, P. H.; Nelson, B. H.; Holt, R. A.	2013	J Pathol	229	4	515-24	10.1002/path.4105
89	No association between germline and somatic	Novel POLE pathogenic germline variant in a family with multiple primary tumors results in distinct mutational signatures	CastellsaguÃ©, E.; Li, R.; Aligue, R.; GonzÃ¡lez, S.; Sanz, J.; Martin, E.; Velasco, Ã€; CapellÃ¡, G.; Stewart, C. J. R.; Vidal, A.; Majewski, J.; Rivera, B.; Polak, P.; Matias-Guiu, X.; Brunet, J.; Foulkes, W. D.	2019	Hum Mutat	40	1	36-41	10.1002/humu.23676
90	No association between germline and somatic	Prevalence of MLH1 constitutional epimutations as a cause of Lynch syndrome in unselected versus selected consecutive series of patients with colorectal cancer	Castillejo, A.; HernÃ¡ndez-IllÃ¡n, E.; Rodriguez-Soler, M.; PÃ©rez-Carbonell, L.; Egoavil, C.; BarberÃ¡, V. M.; Castillejo, M. I.; Guarinos, C.; MartÃ­nez-de-DueÃ±as, E.; Juan, M. J.; SÃ¡nchez-Heras, A. B.; GarcÃ­a-Casado, Z.; Ruiz-Ponte, C.; Brea-FernÃ¡ndez, A.; JuÃ¡rez, M.; Bujanda, L.; Clofent, J.; Llor, X.; Andreu, M.; Castells, A.; Carracedo, A.; Alenda, C.; PayÃ¡, A.; Jover, R.; Soto, J. L.	2015	J Med Genet	52	7	498-502	10.1136/jmedgenet-2015-103076
91	No association between germline and somatic	Germline mutations in FH confer predisposition to malignant pheochromocytomas and paragangliomas	Castro-Vega, L. J.; Buffet, A.; De Cubas, A. A.; CascÃ³n, A.; Menara, M.; Khalifa, E.; Amar, L.; Azriel, S.; Bourdeau, I.; Chabre, O.; CurrÃ¡s-Freixes, M.; Franco-Vidal, V.; Guillaud-Bataille, M.; Simian, C.; Morin, A.; LetÃ³n, R.; GÃ³mez-GraÃ±a, A.; Pollard, P. J.; Rustin, P.; Robledo, M.; Favier, J.; Gimenez-Roqueplo, A. P.	2014	Hum Mol Genet	23	9	2440-6	10.1093/hmg/ddt639
92	No association between germline and somatic	Multi-omics analysis defines core genomic alterations in pheochromocytomas and paragangliomas	Castro-Vega, L. J.; LetouzÃ©, E.; Burnichon, N.; Buffet, A.; Disderot, P. H.; Khalifa, E.; Loriot, C.; Elarouci, N.; Morin, A.; Menara, M.; Lepoutre-Lussey, C.; Badoual, C.; Sibony, M.; Dousset, B.; LibÃ©, R.; Zinzindohoue, F.; Plouin, P. F.; Bertherat, J.; Amar, L.; de ReyniÃ¨s, A.; Favier, J.; Gimenez-Roqueplo, A. P.	2015	Nat Commun	6		6044	10.1038/ncomms7044
93	No association between germline and somatic	BRAF gene is somatically mutated but does not make a major contribution to malignant melanoma susceptibility: the Italian Melanoma Intergroup Study	Casula, M.; Colombino, M.; Satta, M. P.; Cossu, A.; Ascierto, P. A.; Bianchi-ScarrÃ , G.; Castiglia, D.; Budroni, M.; Rozzo, C.; Manca, A.; Lissia, A.; Carboni, A.; Petretto, E.; Satriano, S. M.; Botti, G.; Mantelli, M.; Ghiorzo, P.; Stratton, M. R.; Tanda, F.; Palmieri, G.	2004	J Clin Oncol	22	2	286-92	10.1200/jco.2004.07.112
94	No association between germline and somatic	Role of key-regulator genes in melanoma susceptibility and pathogenesis among patients from South Italy	Casula, M.; Muggiano, A.; Cossu, A.; Budroni, M.; CaracÃ², C.; Ascierto, P. A.; Pagani, E.; Stanganelli, I.; Canzanella, S.; Sini, M.; Palomba, G.; Palmieri, G.	2009	BMC Cancer	9		352	10.1186/1471-2407-9-352
95	No association between germline and somatic	Germline and somatic mutations in patients with multiple primary melanomas: a next generation sequencing study	Casula, M.; Paliogiannis, P.; Ayala, F.; De Giorgi, V.; Stanganelli, I.; MandalÃ , M.; Colombino, M.; Manca, A.; Sini, M. C.; CaracÃ², C.; Ascierto, P. A.; Satta, R. R.; Lissia, A.; Cossu, A.; Palmieri, G.	2019	BMC Cancer	19	1	772	10.1186/s12885-019-5984-7
96	No association between germline and somatic	Identification of de novo germline mutations in the HRPT2 gene in two apparently sporadic cases with challenging parathyroid tumor diagnoses	Cavaco, B. M.; Santos, R.; FÃ©lix, A.; Carvalho, D.; Lopes, J. M.; Domingues, R.; Sirgado, M.; Rei, N.; Fonseca, F.; Santos, J. R.; Sobrinho, L.; Leite, V.	2011	Endocr Pathol	22	1	44-52	10.1007/s12022-011-9151-1
97	No association between germline and somatic	Expression of recessive alleles by chromosomal mechanisms in retinoblastoma	Cavenee, W. K.; Dryja, T. P.; Phillips, R. A.; Benedict, W. F.; Godbout, R.; Gallie, B. L.; Murphree, A. L.; Strong, L. C.; White, R. L.	1983	Nature	305	5937	779-84	10.1038/305779a0
98	No association between germline and somatic	Juvenile myelomonocytic leukemia displays mutations in components of the RAS pathway and the PRC2 network	Caye, A.; Strullu, M.; Guidez, F.; Cassinat, B.; Gazal, S.; Fenneteau, O.; Lainey, E.; Nouri, K.; Nakhaei-Rad, S.; Dvorsky, R.; Lachenaud, J.; Pereira, S.; Vivent, J.; Verger, E.; Vidaud, D.; Galambrun, C.; Picard, C.; Petit, A.; Contet, A.; PoirÃ©e, M.; Sirvent, N.; MÃ©chinaud, F.; Adjaoud, D.; Paillard, C.; Nelken, B.; Reguerre, Y.; Bertrand, Y.; HÃ¤ussinger, D.; Dalle, J. H.; Ahmadian, M. R.; …	2015	Nat Genet	47	11	1334-40	10.1038/ng.3420
99	No association between germline and somatic	Mismatch Repair-Deficient Rectal Cancer and Resistance to Neoadjuvant Chemotherapy	Cercek, A.; Dos Santos Fernandes, G.; Roxburgh, C. S.; Ganesh, K.; Ng, S.; Sanchez-Vega, F.; Yaeger, R.; Segal, N. H.; Reidy-Lagunes, D. L.; Varghese, A. M.; Markowitz, A.; Wu, C.; Szeglin, B.; SauvÃ©, C. G.; Salo-Mullen, E.; Tran, C.; Patel, Z.; Krishnan, A.; Tkachuk, K.; Nash, G. M.; Guillem, J.; Paty, P. B.; Shia, J.; Schultz, N.; Garcia-Aguilar, J.; Diaz, L. A.; Goodman, K.; Saltz, L. B.; Wei…	2020	Clin Cancer Res	26	13	3271-3279	10.1158/1078-0432.Ccr-19-3728
100	No association between germline and somatic	Patients with genetically heterogeneous synchronous colorectal cancer carry rare damaging germline mutations in immune-related genes	Cereda, M.; Gambardella, G.; Benedetti, L.; Iannelli, F.; Patel, D.; Basso, G.; Guerra, R. F.; Mourikis, T. P.; Puccio, I.; Sinha, S.; Laghi, L.; Spencer, J.; Rodriguez-Justo, M.; Ciccarelli, F. D.	2016	Nat Commun	7		12072	10.1038/ncomms12072
101	No association between germline and somatic	Thyroid carcinoma usually occurs in patients with familial adenomatous polyposis in the absence of biallelic inactivation of the adenomatous polyposis coli gene	Cetta, F.; Curia, M. C.; Montalto, G.; Gori, M.; Cama, A.; Battista, P.; Barbarisi, A.	2001	J Clin Endocrinol Metab	86	1	427-32	10.1210/jcem.86.1.7095
102	No association between germline and somatic	Hereditary and somatic DNA mismatch repair gene mutations in sporadic endometrial carcinoma	Chadwick, R. B.; Pyatt, R. E.; Niemann, T. H.; Richards, S. K.; Johnson, C. K.; Stevens, M. W.; Meek, J. E.; Hampel, H.; Prior, T. W.; de la Chapelle, A.	2001	J Med Genet	38	7	461-6	10.1136/jmg.38.7.461
103	No association between germline and somatic	Therapeutic relevance of targeted sequencing in management of patients with advanced biliary tract cancer: DNA damage repair gene mutations as a predictive biomarker	Chae, H.; Kim, D.; Yoo, C.; Kim, K. P.; Jeong, J. H.; Chang, H. M.; Lee, S. S.; Park, D. H.; Song, T. J.; Hwang, S.; Kim, K. H.; Song, G. W.; Ahn, C. S.; Lee, J. H.; Hwang, D. W.; Kim, S. C.; Jang, S. J.; Hong, S. M.; Kim, T. W.; Ryoo, B. Y.	2019	Eur J Cancer	120		31-39	10.1016/j.ejca.2019.07.022
104	No association between germline and somatic	NRAS germline variant G138R and multiple rare somatic mutations on APC in colorectal cancer patients in Taiwan by next generation sequencing	Chang, P. Y.; Chen, J. S.; Chang, N. C.; Chang, S. C.; Wang, M. C.; Tsai, S. H.; Wen, Y. H.; Tsai, W. S.; Chan, E. C.; Lu, J. J.	2016	Oncotarget	7	25	37566-37580	10.18632/oncotarget.8885
105	No association between germline and somatic	Prevalence and clinical significance of BRCA1/2 germline and somatic mutations in Taiwanese patients with ovarian cancer	Chao, A.; Chang, T. C.; Lapke, N.; Jung, S. M.; Chi, P.; Chen, C. H.; Yang, L. Y.; Lin, C. T.; Huang, H. J.; Chou, H. H.; Liou, J. D.; Chen, S. J.; Wang, T. H.; Lai, C. H.	2016	Oncotarget	7	51	85529-85541	10.18632/oncotarget.13456
106	No association between germline and somatic	Molecular characteristics of endometrial cancer coexisting with peritoneal malignant mesothelioma in Li-Fraumeni-like syndrome	Chao, A.; Lai, C. H.; Lee, Y. S.; Ueng, S. H.; Lin, C. Y.; Wang, T. H.	2015	BMC Cancer	15		8	10.1186/s12885-015-1010-x
107	No association between germline and somatic	Molecular comparison of interval and screen-detected breast cancers	Cheasley, D.; Li, N.; Rowley, S. M.; Elder, K.; Mann, G. B.; Loi, S.; Savas, P.; Goode, D. L.; Kader, T.; Zethoven, M.; Semple, T.; Fox, S. B.; Pang, J. M.; Byrne, D.; Devereux, L.; Nickson, C.; Procopio, P.; Lee, G.; Hughes, S.; Saunders, H.; Fujihara, K. M.; Kuykhoven, K.; Connaughton, J.; James, P. A.; Gorringe, K. L.; Campbell, I. G.	2019	J Pathol	248	2	243-252	10.1002/path.5251
108	No association between germline and somatic	Comparison of BRCA versus non-BRCA germline mutations and associated somatic mutation profiles in patients with unselected breast cancer	Chen, B.; Zhang, G.; Li, X.; Ren, C.; Wang, Y.; Li, K.; Mok, H.; Cao, L.; Wen, L.; Jia, M.; Li, C.; Guo, L.; Wei, G.; Lin, J.; Li, Y.; Zhang, Y.; Han-Zhang, H.; Liu, J.; Lizaso, A.; Liao, N.	2020	Aging (Albany NY)	12	4	3140-3155	10.18632/aging.102783
109	No association between germline and somatic	Next-generation-sequencing of recurrent childhood high hyperdiploid acute lymphoblastic leukemia reveals mutations typically associated with high risk patients	Chen, C.; Bartenhagen, C.; Gombert, M.; Okpanyi, V.; Binder, V.; RÃ¶ttgers, S.; Bradtke, J.; Teigler-Schlegel, A.; Harbott, J.; Ginzel, S.; Thiele, R.; Husemann, P.; Krell, P. F.; Borkhardt, A.; Dugas, M.; Hu, J.; Fischer, U.	2015	Leuk Res	39	9	990-1001	10.1016/j.leukres.2015.06.005
110	No association between germline and somatic	Genomic profiling of 766 cancer-related genes in archived esophageal normal and carcinoma tissues	Chen, J.; Guo, L.; Peiffer, D. A.; Zhou, L.; Chan, O. T.; Bibikova, M.; Wickham-Garcia, E.; Lu, S. H.; Zhan, Q.; Wang-Rodriguez, J.; Jiang, W.; Fan, J. B.	2008	Int J Cancer	122	10	2249-54	10.1002/ijc.23397
111	No association between germline and somatic	Whole-exome sequencing reveals potential germline and somatic mutations in 60 malignant ovarian germ cell tumorsâ€	Chen, J.; Li, Y.; Wu, J.; Liu, Y.; Kang, S.	2021	Biol Reprod	105	1	164-178	10.1093/biolre/ioab052
112	No association between germline and somatic	Clonality and evolutionary history of rhabdomyosarcoma	Chen, L.; Shern, J. F.; Wei, J. S.; Yohe, M. E.; Song, Y. K.; Hurd, L.; Liao, H.; Catchpoole, D.; Skapek, S. X.; Barr, F. G.; Hawkins, D. S.; Khan, J.	2015	PLoS Genet	11	3	e1005075	10.1371/journal.pgen.1005075
113	No association between germline and somatic	Germline polymorphisms associated with impaired survival outcomes and somatic tumor alterations in advanced prostate cancer	Chen, W. S.; Feng, E. L.; Aggarwal, R.; Foye, A.; Beer, T. M.; Alumkal, J. J.; Gleave, M.; Chi, K. N.; Reiter, R. E.; Rettig, M. B.; Evans, C. P.; Small, E. J.; Sharifi, N.; Zhao, S. G.	2020	Prostate Cancer Prostatic Dis	23	2	316-323	10.1038/s41391-019-0188-4
114	No association between germline and somatic	Comprehensive detection of germline variants by MSK-IMPACT, a clinical diagnostic platform for solid tumor molecular oncology and concurrent cancer predisposition testing	Cheng, D. T.; Prasad, M.; Chekaluk, Y.; Benayed, R.; Sadowska, J.; Zehir, A.; Syed, A.; Wang, Y. E.; Somar, J.; Li, Y.; Yelskaya, Z.; Wong, D.; Robson, M. E.; Offit, K.; Berger, M. F.; Nafa, K.; Ladanyi, M.; Zhang, L.	2017	BMC Med Genomics	10	1	33	10.1186/s12920-017-0271-4
115	No association between germline and somatic	Biallelic Inactivation of BRCA2 in Platinum-sensitive Metastatic Castration-resistant Prostate Cancer	Cheng, H. H.; Pritchard, C. C.; Boyd, T.; Nelson, P. S.; Montgomery, B.	2016	Eur Urol	69	6	992-5	10.1016/j.eururo.2015.11.022
116	No association between germline and somatic	Evaluation of PPP2R2A as a prostate cancer susceptibility gene: a comprehensive germline and somatic study	Cheng, Y.; Liu, W.; Kim, S. T.; Sun, J.; Lu, L.; Sun, J.; Zheng, S. L.; Isaacs, W. B.; Xu, J.	2011	Cancer Genet	204	7	375-81	10.1016/j.cancergen.2011.05.002
117	No association between germline and somatic	Potential genetic modifiers for somatic EGFR mutation in lung cancer: a meta-analysis and literature review	Cheng, Y. I.; Gan, Y. C.; Liu, D.; Davies, M. P. A.; Li, W. M.; Field, J. K.	2019	BMC Cancer	19	1	1068	10.1186/s12885-019-6317-6
118	No association between germline and somatic	Poorly differentiated thyroid carcinoma of childhood and adolescence: a distinct entity characterized by DICER1 mutations	Chernock, R. D.; Rivera, B.; Borrelli, N.; Hill, D. A.; Fahiminiya, S.; Shah, T.; Chong, A. S.; Aqil, B.; Mehrad, M.; Giordano, T. J.; Sheridan, R.; Rutter, M. M.; Dehner, L. P.; Foulkes, W. D.; Nikiforov, Y. E.	2020	Mod Pathol	33	7	1264-1274	10.1038/s41379-020-0458-7
119	No association between germline and somatic	Analysis of RET proto-oncogene abnormalities in patients with MEN 2A, MEN 2B, familial or sporadic medullary thyroid carcinoma	Chiefari, E.; Russo, D.; Giuffrida, D.; Zampa, G. A.; Meringolo, D.; Arturi, F.; Chiodini, I.; Bianchi, D.; Attard, M.; Trischitta, V.; Bruno, R.; Giannasio, P.; Pontecorvi, A.; Filetti, S.	1998	J Endocrinol Invest	21	6	358-64	10.1007/bf03350771
120	No association between germline and somatic	Stemness regulation of the adrenal mixed corticomedullary tumorigenesis-a case-control study	Chiou, H. C.; Jiang, H. J.; Yang, S. F.; Kuo, K. K.; Lin, P. C.; Hsiao, P. J.	2020	Neoplasia	22	7	263-271	10.1016/j.neo.2020.04.003
121	No association between germline and somatic	Incidence, clinicopathologic, and genetic characteristics of mismatch repair gene-mutated glioblastomas	Cho, Y. A.; Kim, D.; Lee, B.; Shim, J. H.; Suh, Y. L.	2021	J Neurooncol	153	1	43-53	10.1007/s11060-021-03710-0
122	No association between germline and somatic	Clinical Impact of Somatic Variants in Homologous Recombination Repair-Related Genes in Ovarian High-Grade Serous Carcinoma	Choi, M. C.; Hwang, S.; Kim, S.; Jung, S. G.; Park, H.; Joo, W. D.; Song, S. H.; Lee, C.; Kim, T. H.; Kang, H.; An, H. J.	2020	Cancer Res Treat	52	2	634-644	10.4143/crt.2019.207
123	No association between germline and somatic	CDH1 mutations in gastric cancers are not associated with family history	Choi, S.; Jang, J.; Heo, Y. J.; Kang, S. Y.; Kim, S. T.; Lee, J.; Kang, W. K.; Kim, J. W.; Kim, K. M.	2020	Pathol Res Pract	216	5	152941	10.1016/j.prp.2020.152941
124	No association between germline and somatic	Disparate genomic characteristics of concurrent endometrial adenocarcinoma and ovarian granulosa cell tumor, revealed by targeted next-generation sequencing	Choi, Y. J.; Ho, J.; Lee, A.; Hur, S. Y.; Park, H. C.; Park, J. S.; Chung, Y. J.; Lee, S. H.	2018	Pathol Res Pract	214	8	1231-1233	10.1016/j.prp.2018.06.009
125	No association between germline and somatic	Phase II and biomarker study of the dual MET/VEGFR2 inhibitor foretinib in patients with papillary renal cell carcinoma	Choueiri, T. K.; Vaishampayan, U.; Rosenberg, J. E.; Logan, T. F.; Harzstark, A. L.; Bukowski, R. M.; Rini, B. I.; Srinivas, S.; Stein, M. N.; Adams, L. M.; Ottesen, L. H.; Laubscher, K. H.; Sherman, L.; McDermott, D. F.; Haas, N. B.; Flaherty, K. T.; Ross, R.; Eisenberg, P.; Meltzer, P. S.; Merino, M. J.; Bottaro, D. P.; Linehan, W. M.; Srinivasan, R.	2013	J Clin Oncol	31	2	181-6	10.1200/jco.2012.43.3383
126	No association between germline and somatic	DNA Polymerase and Mismatch Repair Exert Distinct Microsatellite Instability Signatures in Normal and Malignant Human Cells	Chung, J.; Maruvka, Y. E.; Sudhaman, S.; Kelly, J.; Haradhvala, N. J.; Bianchi, V.; Edwards, M.; Forster, V. J.; Nunes, N. M.; Galati, M. A.; Komosa, M.; Deshmukh, S.; Cabric, V.; Davidson, S.; Zatzman, M.; Light, N.; Hayes, R.; Brunga, L.; Anderson, N. D.; Ho, B.; Hodel, K. P.; Siddaway, R.; Morrissy, A. S.; Bowers, D. C.; Larouche, V.; Bronsema, A.; Osborn, M.; Cole, K. A.; Opocher, E.; Mason, …	2021	Cancer Discov	11	5	1176-1191	10.1158/2159-8290.Cd-20-0790
127	No association between germline and somatic	Classical point mutations of RET, BRAF and RAS oncogenes are not shared in papillary and medullary thyroid cancer occurring simultaneously in the same gland	Ciampi, R.; Romei, C.; Pieruzzi, L.; Tacito, A.; Molinaro, E.; Agate, L.; Bottici, V.; Casella, F.; Ugolini, C.; Materazzi, G.; Basolo, F.; Elisei, R.	2017	J Endocrinol Invest	40	1	55-62	10.1007/s40618-016-0526-5
128	No association between germline and somatic	Concomitant mutation and epimutation of the MLH1 gene in a Lynch syndrome family	Cini, G.; Carnevali, I.; Quaia, M.; Chiaravalli, A. M.; Sala, P.; Giacomini, E.; Maestro, R.; Tibiletti, M. G.; Viel, A.	2015	Carcinogenesis	36	4	452-8	10.1093/carcin/bgv015
129	No association between germline and somatic	PARP inhibitor resistance and TP53 mutations in patients treated with olaparib for BRCA-mutated cancer: Four case reports	Collot, T.; Niogret, J.; Carnet, M.; Chevrier, S.; Humblin, E.; Favier, L.; Bengrine-Lefevre, L.; Desmoulins, I.; Arnould, L.; Boidot, R.	2021	Mol Med Rep	23	1		10.3892/mmr.2020.11713
130	No association between germline and somatic	Copy number variation analysis on a non-Hodgkin lymphoma case-control study identifies an 11q25 duplication associated with diffuse large B-cell lymphoma	Conde, L.; Riby, J.; Zhang, J.; Bracci, P. M.; Skibola, C. F.	2014	PLoS One	9	8	e105382	10.1371/journal.pone.0105382
131	No association between germline and somatic	Lineage-Independent Tumors in Bilateral Neuroblastoma	Coorens, T. H. H.; Farndon, S. J.; Mitchell, T. J.; Jain, N.; Lee, S.; Hubank, M.; Sebire, N.; Anderson, J.; Behjati, S.	2020	N Engl J Med	383	19	1860-1865	10.1056/NEJMoa2000962
132	No association between germline and somatic	MEN1 in pancreatic endocrine tumors: analysis of gene and protein status in 169 sporadic neoplasms reveals alterations in the vast majority of cases	Corbo, V.; Dalai, I.; Scardoni, M.; Barbi, S.; Beghelli, S.; Bersani, S.; Albarello, L.; Doglioni, C.; Schott, C.; Capelli, P.; Chilosi, M.; Boninsegna, L.; Becker, K. F.; Falconi, M.; Scarpa, A.	2010	Endocr Relat Cancer	17	3	771-83	10.1677/erc-10-0028
133	No association between germline and somatic	Biallelic NF1 inactivation in high grade serous ovarian cancers from patients with neurofibromatosis type 1	Courtney, E.; Chan, S. H.; Li, S. T.; Ishak, D.; Merchant, K.; Shaw, T.; Chay, W. Y.; Chin, F. H. X.; Wong, W. L.; Wong, A.; Ngeow, J.	2020	Fam Cancer	19	4	353-358	10.1007/s10689-020-00184-3
134	No association between germline and somatic	Spectrum of germline mutations in smokers and non-smokers in Brazilian non-small-cell lung cancer (NSCLC) patients	Couto, P. P.; Bastos-Rodrigues, L.; Schayek, H.; Melo, F. M.; Lisboa, R. G. C.; Miranda, D. M.; Vilhena, A.; Bale, A. E.; Friedman, E.; De Marco, L.	2017	Carcinogenesis	38	11	1112-1118	10.1093/carcin/bgx089
135	No association between germline and somatic	Refining the relation between 'first hits' and 'second hits' at the APC locus: the 'loose fit' model and evidence for differences in somatic mutation spectra among patients	Crabtree, M.; Sieber, O. M.; Lipton, L.; Hodgson, S. V.; Lamlum, H.; Thomas, H. J.; Neale, K.; Phillips, R. K.; Heinimann, K.; Tomlinson, I. P.	2003	Oncogene	22	27	4257-65	10.1038/sj.onc.1206471
136	No association between germline and somatic	MAX mutations status in Swedish patients with pheochromocytoma and paraganglioma tumours	Crona, J.; Maharjan, R.; Delgado Verdugo, A.; StÃ¥lberg, P.; Granberg, D.; Hellman, P.; BjÃ¶rklund, P.	2014	Fam Cancer	13	1	121-5	10.1007/s10689-013-9666-3
137	No association between germline and somatic	Integrative genetic characterization and phenotype correlations in pheochromocytoma and paraganglioma tumours	Crona, J.; Nordling, M.; Maharjan, R.; Granberg, D.; StÃ¥lberg, P.; Hellman, P.; BjÃ¶rklund, P.	2014	PLoS One	9	1	e86756	10.1371/journal.pone.0086756
138	No association between germline and somatic	The Impact of Whole Genome Data on Therapeutic Decision-Making in Metastatic Prostate Cancer: A Retrospective Analysis	Crumbaker, M.; Chan, E. K. F.; Gong, T.; Corcoran, N.; Jaratlerdsiri, W.; Lyons, R. J.; Haynes, A. M.; Kulidjian, A. A.; Kalsbeek, A. M. F.; Petersen, D. C.; Stricker, P. D.; Jamieson, C. A. M.; Croucher, P. I.; Hovens, C. M.; Joshua, A. M.; Hayes, V. M.	2020	Cancers (Basel)	12	5		10.3390/cancers12051178
139	No association between germline and somatic	Hypermethylation of the hMLH1 promoter in colon cancer with microsatellite instability	Cunningham, J. M.; Christensen, E. R.; Tester, D. J.; Kim, C. Y.; Roche, P. C.; Burgart, L. J.; Thibodeau, S. N.	1998	Cancer Res	58	15	3455-60
140	No association between germline and somatic	Clinical characteristics of ovarian cancer classified by BRCA1, BRCA2, and RAD51C status	Cunningham, J. M.; Cicek, M. S.; Larson, N. B.; Davila, J.; Wang, C.; Larson, M. C.; Song, H.; Dicks, E. M.; Harrington, P.; Wick, M.; Winterhoff, B. J.; Hamidi, H.; Konecny, G. E.; Chien, J.; Bibikova, M.; Fan, J. B.; Kalli, K. R.; Lindor, N. M.; Fridley, B. L.; Pharoah, P. P.; Goode, E. L.	2014	Sci Rep	4		4026	10.1038/srep04026
141	No association between germline and somatic	The frequency of hereditary defective mismatch repair in a prospective series of unselected colorectal carcinomas	Cunningham, J. M.; Kim, C. Y.; Christensen, E. R.; Tester, D. J.; Parc, Y.; Burgart, L. J.; Halling, K. C.; McDonnell, S. K.; Schaid, D. J.; Walsh Vockley, C.; Kubly, V.; Nelson, H.; Michels, V. V.; Thibodeau, S. N.	2001	Am J Hum Genet	69	4	780-90	10.1086/323658
142	No association between germline and somatic	Recommendations for somatic and germline genetic testing of single pheochromocytoma and paraganglioma based on findings from a series of 329 patients	CurrÃ¡s-Freixes, M.; Inglada-PÃ©rez, L.; Mancikova, V.; Montero-Conde, C.; LetÃ³n, R.; Comino-MÃ©ndez, I.; ApellÃ¡niz-Ruiz, M.; SÃ¡nchez-Barroso, L.; Aguirre SÃ¡nchez-Covisa, M.; AlcÃ¡zar, V.; Aller, J.; Ãlvarez-EscolÃ¡, C.; AndÃ­a-Melero, V. M.; Azriel-Mira, S.; Calatayud-GutiÃ©rrez, M.; DÃ­az, JÃ; DÃ­ez-HernÃ¡ndez, A.; Lamas-Oliveira, C.; Marazuela, M.; Matias-Guiu, X.; Meoro-AvilÃ©s, A.; Pat…	2015	J Med Genet	52	10	647-56	10.1136/jmedgenet-2015-103218
143	No association between germline and somatic	Germline variants in DNA repair genes are associated with young-onset head and neck cancer	Cury, S. S.; Miranda, P. M.; Marchi, F. A.; Canto, L. M. D.; Chulam, T. C.; Petersen, A. H.; Aagaard, M. M.; Pinto, C. A. L.; Kowalski, L. P.; Rogatto, S. R.	2021	Oral Oncol	122		105545	10.1016/j.oraloncology.2021.105545
144	No association between germline and somatic	Common mitochondrial polymorphisms as risk factor for endometrial cancer	Czarnecka, A. M.; Klemba, A.; Semczuk, A.; Plak, K.; Marzec, B.; Krawczyk, T.; Kofler, B.; Golik, P.; Bartnik, E.	2009	Int Arch Med	2	1	33	10.1186/1755-7682-2-33
145	No association between germline and somatic	Two novel cases of trilateral retinoblastoma: genetics and review of the literature	D'Elia, G.; Grotta, S.; Del Bufalo, F.; De Ioris, M. A.; Surace, C.; Sirleto, P.; Romanzo, A.; Cozza, R.; Locatelli, F.; Angioni, A.	2013	Cancer Genet	206	11	398-401	10.1016/j.cancergen.2013.11.001
146	No association between germline and somatic	Analysis of the Birt-Hogg-DubÃ© (BHD) tumour suppressor gene in sporadic renal cell carcinoma and colorectal cancer	da Silva, N. F.; Gentle, D.; Hesson, L. B.; Morton, D. G.; Latif, F.; Maher, E. R.	2003	J Med Genet	40	11	820-4	10.1136/jmg.40.11.820
147	No association between germline and somatic	Germline and somatic DNA repair gene alterations in prostate cancer	Dall'Era, M. A.; McPherson, J. D.; Gao, A. C.; DeVere White, R. W.; Gregg, J. P.; Lara, P. N., Jr.	2020	Cancer	126	13	2980-2985	10.1002/cncr.32908
148	No association between germline and somatic	Cutaneous melanoma in childhood and adolescence shows frequent loss of INK4A and gain of KIT	Daniotti, M.; Ferrari, A.; Frigerio, S.; Casieri, P.; Miselli, F.; Zucca, E.; Collini, P.; Della Torre, G.; Manoukian, S.; Peissel, B.; Bono, A.; Santinami, M.; Parmiani, G.; Rivoltini, L.; Pilotti, S.; Rodolfo, M.	2009	J Invest Dermatol	129	7	1759-68	10.1038/jid.2008.422
149	No association between germline and somatic	BRCA1/2 mutations and expression: response to platinum chemotherapy in patients with advanced stage epithelial ovarian cancer	Dann, R. B.; DeLoia, J. A.; Timms, K. M.; Zorn, K. K.; Potter, J.; Flake, D. D., 2nd; Lanchbury, J. S.; Krivak, T. C.	2012	Gynecol Oncol	125	3	677-82	10.1016/j.ygyno.2012.03.006
150	No association between germline and somatic	Von Hippel-Lindau gene alterations in sporadic benign and malignant pheochromocytomas	Dannenberg, H.; De Krijger, R. R.; van der Harst, E.; Abbou, M.; I. Jzendoorn Y; Komminoth, P.; Dinjens, W. N.	2003	Int J Cancer	105	2	190-5	10.1002/ijc.11060
151	No association between germline and somatic	Phosphodiesterase sequence variants may predispose to prostate cancer	de Alexandre, R. B.; Horvath, A. D.; Szarek, E.; Manning, A. D.; Leal, L. F.; Kardauke, F.; Epstein, J. A.; Carraro, D. M.; Soares, F. A.; Apanasovich, T. V.; Stratakis, C. A.; Faucz, F. R.	2015	Endocr Relat Cancer	22	4	519-30	10.1530/erc-15-0134
152	No association between germline and somatic	Proficiency of DNA repair genes and microsatellite instability in operated colorectal cancer patients with clinical suspicion of lynch syndrome	de Freitas, I. N.; de Campos, F. G.; Alves, V. A.; Cavalcante, J. M.; Carraro, D.; Coudry Rde, A.; Diniz, M. A.; Nahas, S. C.; Ribeiro, U., Jr.	2015	J Gastrointest Oncol	6	6	628-37	10.3978/j.issn.2078-6891.2015.089
153	No association between germline and somatic	Sequencing of DICER1 in sarcomas identifies biallelic somatic DICER1 mutations in an adult-onset embryonal rhabdomyosarcoma	de Kock, L.; Rivera, B.; Revil, T.; Thorner, P.; Goudie, C.; Bouron-Dal Soglio, D.; Choong, C. S.; Priest, J. R.; van Diest, P. J.; Tanboon, J.; Wagner, A.; Ragoussis, J.; Choong, P. F.; Foulkes, W. D.	2017	Br J Cancer	116	12	1621-1626	10.1038/bjc.2017.147
154	No association between germline and somatic	Germ-line and somatic DICER1 mutations in pineoblastoma	de Kock, L.; Sabbaghian, N.; Druker, H.; Weber, E.; Hamel, N.; Miller, S.; Choong, C. S.; Gottardo, N. G.; Kees, U. R.; Rednam, S. P.; van Hest, L. P.; Jongmans, M. C.; Jhangiani, S.; Lupski, J. R.; Zacharin, M.; Bouron-Dal Soglio, D.; Huang, A.; Priest, J. R.; Perry, A.; Mueller, S.; Albrecht, S.; Malkin, D.; Grundy, R. G.; Foulkes, W. D.	2014	Acta Neuropathol	128	4	583-95	10.1007/s00401-014-1318-7
155	No association between germline and somatic	JAK3 in clear cell renal cell carcinoma: mutational screening and clinical implications	de Martino, M.; Gigante, M.; Cormio, L.; Prattichizzo, C.; Cavalcanti, E.; Gigante, M.; Ariano, V.; Netti, G. S.; Montemurno, E.; Mancini, V.; Battaglia, M.; Gesualdo, L.; Carrieri, G.; Ranieri, E.	2013	Urol Oncol	31	6	930-7	10.1016/j.urolonc.2011.07.001
156	No association between germline and somatic	DNA repair genes are selectively mutated in diffuse large B cell lymphomas	de Miranda, N. F.; Peng, R.; Georgiou, K.; Wu, C.; Falk SÃ¶rqvist, E.; Berglund, M.; Chen, L.; Gao, Z.; Lagerstedt, K.; Lisboa, S.; Roos, F.; van Wezel, T.; Teixeira, M. R.; Rosenquist, R.; SundstrÃ¶m, C.; Enblad, G.; Nilsson, M.; Zeng, Y.; Kipling, D.; Pan-HammarstrÃ¶m, Q.	2013	J Exp Med	210	9	1729-42	10.1084/jem.20122842
157	No association between germline and somatic	Clinicopathological and molecular characterization of Brazilian families at risk for Lynch syndrome	de Paula, A. E.; GalvÃ£o, H. C. R.; Bonatelli, M.; Sabato, C.; Fernandes, G. C.; Berardinelli, G. N.; Andrade, C. E. M.; Neto, M. C.; Romagnolo, L. G. C.; Campacci, N.; Scapulatempo-Neto, C.; Reis, R. M.; Palmero, E. I.	2021	Cancer Genet	254-255		82-91	10.1016/j.cancergen.2021.02.003
158	No association between germline and somatic	Effect of the p53 P72R Polymorphism on Mutant TP53 Allele Selection in Human Cancer	De Souza, C.; Madden, J.; Koestler, D. C.; Minn, D.; Montoya, D. J.; Minn, K.; Raetz, A. G.; Zhu, Z.; Xiao, W. W.; Tahmassebi, N.; Reddy, H.; Nelson, N.; Karnezis, A. N.; Chien, J.	2021	J Natl Cancer Inst	113	9	1246-1257	10.1093/jnci/djab019
159	No association between germline and somatic	PIK3CA mutations are frequently observed in BRCAX but not BRCA2-associated male breast cancer	Deb, S.; Do, H.; Byrne, D.; Jene, N.; Dobrovic, A.; Fox, S. B.	2013	Breast Cancer Res	15	4	R69	10.1186/bcr3463
160	No association between germline and somatic	Biallelic BRCA2 Mutations Shape the Somatic Mutational Landscape of Aggressive Prostate Tumors	Decker, B.; Karyadi, D. M.; Davis, B. W.; Karlins, E.; Tillmans, L. S.; Stanford, J. L.; Thibodeau, S. N.; Ostrander, E. A.	2016	Am J Hum Genet	98	5	818-829	10.1016/j.ajhg.2016.03.003
161	No association between germline and somatic	Coexistence of schwannomatosis and glioblastoma in two families	Deiller, C.; Van-Gils, J.; Zordan, C.; Tinat, J.; Loiseau, H.; Fabre, T.; Delleci, C.; Cohen, J.; Vidaud, M.; Parfait, B.; Goizet, C.	2019	Eur J Med Genet	62	8	103680	10.1016/j.ejmg.2019.103680
162	No association between germline and somatic	Anti-tumor activity of cetuximab plus avelumab in non-small cell lung cancer patients involves innate immunity activation: findings from the CAVE-Lung trial	Della Corte, C. M.; Fasano, M.; Ciaramella, V.; Cimmino, F.; Cardnell, R.; Gay, C. M.; Ramkumar, K.; Diao, L.; Di Liello, R.; Viscardi, G.; Famiglietti, V.; Ciardiello, D.; Martini, G.; Napolitano, S.; Tuccillo, C.; Troiani, T.; Martinelli, E.; Wang, J.; Byers, L.; Morgillo, F.; Ciardiello, F.	2022	J Exp Clin Cancer Res	41	1	109	10.1186/s13046-022-02332-2
163	No association between germline and somatic	Investigation of microsatellite instability in Turkish breast cancer patients	Demokan, S.; Muslumanoglu, M.; Yazici, H.; Igci, A.; Dalay, N.	2002	Pathol Oncol Res	8	2	138-41	10.1007/bf03033724
164	No association between germline and somatic	MET alterations in biphasic squamoid alveolar papillary renal cell carcinomas and clinicopathological features	Denize, T.; Just, P. A.; Sibony, M.; Blons, H.; Timsit, M. O.; Drossart, T.; Jakubowicz, D.; Broudin, C.; Morini, A.; Molina, T.; Vano, Y.; Auvray-Kuentz, M.; Richard, S.; Mejean, A.; Gimenez Roqueplo, A. P.; Burnichon, N.; Verkarre, V.	2021	Mod Pathol	34	3	647-659	10.1038/s41379-020-0645-6
165	No association between germline and somatic	Targeted next generation sequencing of RB1 gene for the molecular diagnosis of Retinoblastoma	Devarajan, B.; Prakash, L.; Kannan, T. R.; Abraham, A. A.; Kim, U.; Muthukkaruppan, V.; Vanniarajan, A.	2015	BMC Cancer	15		320	10.1186/s12885-015-1340-8
166	No association between germline and somatic	Germline DNMT3A mutation in familial acute myeloid leukaemia	DiNardo, C. D.; Beird, H. C.; Estecio, M.; Hardikar, S.; Takahashi, K.; Bannon, S. A.; Borthakur, G.; Jabbour, E.; Gumbs, C.; Khoury, J. D.; Routbort, M.; Gong, T.; Kondo, K.; Kantarjian, H.; Garcia-Manero, G.; Chen, T.; Futreal, P. A.	2021	Epigenetics	16	5	567-576	10.1080/15592294.2020.1809871
167	No association between germline and somatic	Novel germline and somatic mutations of the MSH2 gene in hereditary non-polyposis colorectal cancer	Ding, D. C.; Huang, R. L.; Chen, C. H.; Chao, C. F.; Chu, T. Y.	2007	Clin Genet	71	2	190-2	10.1111/j.1399-0004.2007.00749.x
168	No association between germline and somatic	Identification and Somatic Characterization of the Germline PTEN Promoter Variant rs34149102 in a Family with Gastrointestinal and Breast Tumors	Disciglio, V.; Sanese, P.; Fasano, C.; Lotesoriere, C.; Valentini, A. M.; Forte, G.; Lepore Signorile, M.; De Marco, K.; Grossi, V.; Lolli, I.; Cariola, F.; Simone, C.	2022	Genes (Basel)	13	4		10.3390/genes13040644
169	No association between germline and somatic	Integrating Tumor Sequencing Into Clinical Practice for Patients With Mismatch Repair-Deficient Lynch Syndrome Spectrum Cancers	Dixon, K.; Asrat, M. J.; Bedard, A. C.; Binnington, K.; Compton, K.; Cremin, C.; Heidary, N.; Lohn, Z.; Lovick, N.; McCullum, M.; Mindlin, A.; O'Loughlin, M.; Petersen, T.; Portigal-Todd, C.; Scott, J.; St-Martin, G.; Thompson, J.; Turnbull, R.; Mung, S. W.; Hong, Q.; Bezeau, M.; Bosdet, I.; Tucker, T.; Young, S.; Yip, S.; Aubertin, G.; Blood, K. A.; Nuk, J.; Sun, S.; Schrader, K. A.	2021	Clin Transl Gastroenterol	12	8	e00397	10.14309/ctg.0000000000000397
170	No association between germline and somatic	The silent mutational landscape of infant MLL-AF4 pro-B acute lymphoblastic leukemia	Dobbins, S. E.; Sherborne, A. L.; Ma, Y. P.; Bardini, M.; Biondi, A.; Cazzaniga, G.; Lloyd, A.; Chubb, D.; Greaves, M. F.; Houlston, R. S.	2013	Genes Chromosomes Cancer	52	10	954-60	10.1002/gcc.22090
171	No association between germline and somatic	The repertoire of genetic alterations in salivary duct carcinoma including a novel HNRNPH3-ALK rearrangement	Dogan, S.; Ng, C. K. Y.; Xu, B.; Kumar, R.; Wang, L.; Edelweiss, M.; Scott, S. N.; Zehir, A.; Drilon, A.; Morris, L. G. T.; Lee, N. Y.; Antonescu, C. R.; Ho, A. L.; Katabi, N.; Berger, M. F.; Reis-Filho, J. S.	2019	Hum Pathol	88		66-77	10.1016/j.humpath.2019.03.004
172	No association between germline and somatic	Biological and clinical evidence for somatic mutations in BRCA1 and BRCA2 as predictive markers for olaparib response in high-grade serous ovarian cancers in the maintenance setting	Dougherty, B. A.; Lai, Z.; Hodgson, D. R.; Orr, M. C. M.; Hawryluk, M.; Sun, J.; Yelensky, R.; Spencer, S. K.; Robertson, J. D.; Ho, T. W.; Fielding, A.; Ledermann, J. A.; Barrett, J. C.	2017	Oncotarget	8	27	43653-43661	10.18632/oncotarget.17613
173	No association between germline and somatic	Incident Cancer Risk and Signatures Among Older MUTYH Carriers: Analysis of Population-Based and Genomic Cohorts	Downie, J. M.; Riaz, M.; Xie, J.; Lee, M.; Chan, A. T.; Gibbs, P.; Orchard, S. G.; Mahady, S. E.; Sebra, R. P.; Murray, A. M.; Macrae, F.; Schadt, E.; Woods, R. L.; McNeil, J. J.; Lacaze, P.; Gala, M.	2022	Cancer Prev Res (Phila)				10.1158/1940-6207.Capr-22-0080
174	No association between germline and somatic	Longitudinal sequencing of RUNX1 familial platelet disorder: new insights into genetic mechanisms of transformation to myeloid malignancies	Duarte, B. K. L.; Yamaguti-Hayakawa, G. G.; Medina, S. S.; Siqueira, L. H.; Snetsinger, B.; Costa, F. F.; Rauh, M. J.; Ozelo, M. C.	2019	Br J Haematol	186	5	724-734	10.1111/bjh.15990
175	No association between germline and somatic	Identification of germline and somatic mutations affecting the retinoblastoma gene	Dunn, J. M.; Phillips, R. A.; Becker, A. J.; Gallie, B. L.	1988	Science	241	4874	1797-800	10.1126/science.3175621
176	No association between germline and somatic	Mutations in the RB1 gene and their effects on transcription	Dunn, J. M.; Phillips, R. A.; Zhu, X.; Becker, A.; Gallie, B. L.	1989	Mol Cell Biol	9	11	4596-604	10.1128/mcb.9.11.4596-4604.1989
177	No association between germline and somatic	Detection of a new heterozygous germline ETV6 mutation in a case with hyperdiploid acute lymphoblastic leukemia	Duployez, N.; Abou Chahla, W.; Lejeune, S.; Marceau-Renaut, A.; Letizia, G.; Boyer, T.; Geffroy, S.; Peyrouze, P.; Grardel, N.; Nelken, B.; Michel, G.; Bertrand, Y.; Preudhomme, C.	2018	Eur J Haematol	100	1	104-107	10.1111/ejh.12981
178	No association between germline and somatic	The co-occurrence of an ovarian Sertoli-Leydig cell tumor with a thyroid carcinoma is highly suggestive of a DICER1 syndrome	Durieux, E.; Descotes, F.; Mauduit, C.; Decaussin, M.; Guyetant, S.; Devouassoux-Shisheboran, M.	2016	Virchows Arch	468	5	631-6	10.1007/s00428-016-1922-0
179	No association between germline and somatic	BRCA1 and TP53 mutation spectrum of breast carcinoma in an ethnic population of Kashmir, an emerging high-risk area	Eachkoti, R.; Hussain, I.; Afroze, D.; Aejazaziz, S.; Jan, M.; Shah, Z. A.; Das, B. C.; Siddiqi, M. A.	2007	Cancer Lett	248	2	308-20	10.1016/j.canlet.2006.08.012
180	No association between germline and somatic	Glioma Groups Based on 1p/19q, IDH, and TERT Promoter Mutations in Tumors	Eckel-Passow, J. E.; Lachance, D. H.; Molinaro, A. M.; Walsh, K. M.; Decker, P. A.; Sicotte, H.; Pekmezci, M.; Rice, T.; Kosel, M. L.; Smirnov, I. V.; Sarkar, G.; Caron, A. A.; Kollmeyer, T. M.; Praska, C. E.; Chada, A. R.; Halder, C.; Hansen, H. M.; McCoy, L. S.; Bracci, P. M.; Marshall, R.; Zheng, S.; Reis, G. F.; Pico, A. R.; O'Neill, B. P.; Buckner, J. C.; Giannini, C.; Huse, J. T.; Perry, A.…	2015	N Engl J Med	372	26	2499-508	10.1056/NEJMoa1407279
181	No association between germline and somatic	Universal Immunohistochemistry for Lynch Syndrome: A Systematic Review and Meta-analysis of 58,580 Colorectal Carcinomas	Eikenboom, E. L.; van der Werf-'t Lam, A. S.; RodrÃ­guez-Girondo, M.; Van Asperen, C. J.; Dinjens, W. N. M.; Hofstra, R. M. W.; Van Leerdam, M. E.; Morreau, H.; Spaander, M. C. W.; Wagner, A.; Nielsen, M.	2022	Clin Gastroenterol Hepatol	20	3	e496-e507	10.1016/j.cgh.2021.04.021
182	No association between germline and somatic	ATM Germline-Mutated Gastroesophageal Junction Adenocarcinomas: Clinical Descriptors, Molecular Characteristics, and Potential Therapeutic Implications	El Jabbour, T.; Misyura, M.; Cowzer, D.; Zimmermann, M.; Rimkunas, V.; Marra, A.; Derakhshan, F.; Selenica, P.; Parilla, M.; Setton, J. S.; Ceyhan-Birsoy, O.; Kemel, Y.; Catchings, A.; Ranganathan, M.; Ku, G. Y.; Janjigian, Y. Y.; Zinda, M.; Koehler, M.; Stadler, Z.; Shia, J.; Reis-Filho, J. S.; Mandelker, D.	2022	J Natl Cancer Inst	114	5	761-770	10.1093/jnci/djac024
183	No association between germline and somatic	RET exon 11 (G691S) polymorphism is significantly more frequent in sporadic medullary thyroid carcinoma than in the general population	Elisei, R.; Cosci, B.; Romei, C.; Bottici, V.; Sculli, M.; Lari, R.; Barale, R.; Pacini, F.; Pinchera, A.	2004	J Clin Endocrinol Metab	89	7	3579-84	10.1210/jc.2003-031898
184	No association between germline and somatic	Paired tumor sequencing and germline testing in breast cancer management: An experience of a single academic center	Elliott, E.; Speare, V.; Coggan, J.; Espenschied, C.; LaDuca, H.; Yussuf, A. F.; Burgess, K.; Gray, P.; Cobleigh, M.; Rao, R.; Patel, J.; Kuzel, T.; Buckingham, L. E.; Usha, L.	2020	Cancer Rep (Hoboken)	3	6	e1287	10.1002/cnr2.1287
185	No association between germline and somatic	Germline variants in POLE are associated with early onset mismatch repair deficient colorectal cancer	Elsayed, F. A.; Kets, C. M.; Ruano, D.; van den Akker, B.; Mensenkamp, A. R.; Schrumpf, M.; Nielsen, M.; Wijnen, J. T.; Tops, C. M.; Ligtenberg, M. J.; Vasen, H. F.; Hes, F. J.; Morreau, H.; van Wezel, T.	2015	Eur J Hum Genet	23	8	1080-4	10.1038/ejhg.2014.242
186	No association between germline and somatic	Somatic mutations in early onset luminal breast cancer	Encinas, G.; Sabelnykova, V. Y.; de Lyra, E. C.; Hirata Katayama, M. L.; Maistro, S.; de Vasconcellos Valle, P. W. M.; de Lima Pereira, G. F.; Rodrigues, L. M.; de Menezes Pacheco Serio, P. A.; de GouvÃªa, Acrc; Geyer, F. C.; Basso, R. A.; Pasini, F. S.; Del Pilar Esteves Diz, M.; Brentani, M. M.; Guedes Sampaio GÃ³es, J. C.; Chammas, R.; Boutros, P. C.; Koike Folgueira, M. A. A.	2018	Oncotarget	9	32	22460-22479	10.18632/oncotarget.25123
187	No association between germline and somatic	Mutations in the RET proto-oncogene and the von Hippel-Lindau disease tumour suppressor gene in sporadic and syndromic phaeochromocytomas	Eng, C.; Crossey, P. A.; Mulligan, L. M.; Healey, C. S.; Houghton, C.; Prowse, A.; Chew, S. L.; Dahia, P. L.; O'Riordan, J. L.; Toledo, S. P.; et al.,	1995	J Med Genet	32	12	934-7	10.1136/jmg.32.12.934
188	No association between germline and somatic	Heterogeneous mutation of the RET proto-oncogene in subpopulations of medullary thyroid carcinoma	Eng, C.; Mulligan, L. M.; Healey, C. S.; Houghton, C.; Frilling, A.; Raue, F.; Thomas, G. A.; Ponder, B. A.	1996	Cancer Res	56	9	2167-70
189	No association between germline and somatic	The surgical strategy and the molecular analysis of patients with parathyroid cancer	Enomoto, K.; Uchino, S.; Ito, A.; Watanabe, S.; Shibuya, H.; Enomoto, Y.; Noguchi, S.	2010	World J Surg	34	11	2604-10	10.1007/s00268-010-0618-x
190	No association between germline and somatic	Mutation landscape of germline and somatic BRCA1/2 in patients with high-grade serous ovarian cancer	Eoh, K. J.; Kim, H. M.; Lee, J. Y.; Kim, S.; Kim, S. W.; Kim, Y. T.; Nam, E. J.	2020	BMC Cancer	20	1	204	10.1186/s12885-020-6693-y
191	No association between germline and somatic	Somatic POLE mutations cause an ultramutated giant cell high-grade glioma subtype with better prognosis	Erson-Omay, E. Z.; Ã‡aÄŸlayan, A. O.; Schultz, N.; Weinhold, N.; Omay, S. B.; Ã–zduman, K.; KÃ¶ksal, Y.; Li, J.; Serin HarmancÄ±, A.; Clark, V.; CarriÃ³n-Grant, G.; Baranoski, J.; Ã‡aÄŸlar, C.; Barak, T.; CoÅŸkun, S.; Baran, B.; KÃ¶se, D.; Sun, J.; BakÄ±rcÄ±oÄŸlu, M.; Moliterno GÃ¼nel, J.; Pamir, M. N.; Mishra-Gorur, K.; Bilguvar, K.; Yasuno, K.; Vortmeyer, A.; Huttner, A. J.; Sander, C.; GÃ¼nel,…	2015	Neuro Oncol	17	10	1356-64	10.1093/neuonc/nov027
192	No association between germline and somatic	Frequency of UV-inducible NRAS mutations in melanomas of patients with germline CDKN2A mutations	Eskandarpour, M.; Hashemi, J.; Kanter, L.; Ringborg, U.; Platz, A.; Hansson, J.	2003	J Natl Cancer Inst	95	11	790-8	10.1093/jnci/95.11.790
193	No association between germline and somatic	Comparison of Germline versus Somatic BAP1 Mutations for Risk of Metastasis in Uveal Melanoma	Ewens, K. G.; Lalonde, E.; Richards-Yutz, J.; Shields, C. L.; Ganguly, A.	2018	BMC Cancer	18	1	1172	10.1186/s12885-018-5079-x
194	No association between germline and somatic	Germline cytoskeletal and extra-cellular matrix-related single nucleotide variations associated with distinct cancer survival rates	Falasiri, S.; Rahman, T.; Tu, Y. N.; Fawcett, T. J.; Blanck, G.	2018	Gene	669		91-98	10.1016/j.gene.2018.05.037
195	No association between germline and somatic	Differences in the molecular mechanisms of adrenocortical tumorigenesis between children and adults	Faria, A. M.; Almeida, M. Q.	2012	Mol Cell Endocrinol	351	1	52-7	10.1016/j.mce.2011.09.040
196	No association between germline and somatic	A comparative analysis of KMT2D missense variants in Kabuki syndrome, cancers and the general population	Faundes, V.; Malone, G.; Newman, W. G.; Banka, S.	2019	J Hum Genet	64	2	161-170	10.1038/s10038-018-0536-6
197	No association between germline and somatic	Interaction analysis between germline genetic variants and somatic mutations in head and neck cancer	Feng, G.; Feng, H.; Qi, Y.; Wang, T.; Ni, N.; Wu, J.; Yuan, H.	2022	Oral Oncol	128		105859	10.1016/j.oraloncology.2022.105859
198	No association between germline and somatic	An integrated analysis of germline and somatic, genetic and epigenetic alterations at 9p21.3 in glioblastoma	Feng, J.; Kim, S. T.; Liu, W.; Kim, J. W.; Zhang, Z.; Zhu, Y.; Berens, M.; Sun, J.; Xu, J.	2012	Cancer	118	1	232-40	10.1002/cncr.26250
199	No association between germline and somatic	A genomic case study of desmoplastic small round cell tumor: comprehensive analysis reveals insights into potential therapeutic targets and development of a monitoring tool for a rare and aggressive disease	Ferreira, E. N.; Barros, B. D.; de Souza, J. E.; Almeida, R. V.; Torrezan, G. T.; Garcia, S.; Krepischi, A. C.; Mello, C. A.; Cunha, I. W.; Pinto, C. A.; Soares, F. A.; Dias-Neto, E.; Lopes, A.; de Souza, S. J.; Carraro, D. M.	2016	Hum Genomics	10	1	36	10.1186/s40246-016-0092-0
200	No association between germline and somatic	Immunohistochemical analyses of colon cancer in I1307K APC mutation carriers compared with noncarriers	Fidder, H. H.; Barshack, I.; Chen-Shtoyerman, R.; Onaca, N.; Goldberg, I.; Rath, P.; Theodor, L.; Bar-Meir, S.; Friedman, E.	2003	Dig Dis Sci	48	6	1102-5	10.1023/a:1023764728863
201	No association between germline and somatic	A systematic review and meta-analysis of somatic and germline DNA sequence biomarkers of esophageal cancer survival, therapy response and stage	Findlay, J. M.; Middleton, M. R.; Tomlinson, I.	2015	Ann Oncol	26	4	624-644	10.1093/annonc/mdu449
202	No association between germline and somatic	Distinction between sporadic and hereditary medullary thyroid carcinoma (MTC) by mutation analysis of the RET proto-oncogene. "Study Group Multiple Endocrine Neoplasia Austria (SMENA)"	Fink, M.; WeinhÃ¼sel, A.; Niederle, B.; Haas, O. A.	1996	Int J Cancer	69	4	312-6	10.1002/(sici)1097-0215(19960822)69:4<312::Aid-ijc13>3.0.Co;2-7
203	No association between germline and somatic	Whole-exome sequencing identifies somatic ATRX mutations in pheochromocytomas and paragangliomas	Fishbein, L.; Khare, S.; Wubbenhorst, B.; DeSloover, D.; D'Andrea, K.; Merrill, S.; Cho, N. W.; Greenberg, R. A.; Else, T.; Montone, K.; LiVolsi, V.; Fraker, D.; Daber, R.; Cohen, D. L.; Nathanson, K. L.	2015	Nat Commun	6		6140	10.1038/ncomms7140
204	No association between germline and somatic	Childhood cerebellar hemangioblastoma does not predict germline or somatic mutations in the von Hippel-Lindau tumor suppressor gene	Fisher, P. G.; Tontiplaphol, A.; Pearlman, E. M.; Duffner, P. K.; Hyder, D. J.; Stolle, C. A.; Vortmeyer, A. O.; Zhuang, Z.	2002	Ann Neurol	51	2	257-60	10.1002/ana.10107
205	No association between germline and somatic	Genetic characterization of medullary thyroid cancer in childhood survivors of the Chernobyl accident	Fisher, S. B.; Cote, G. J.; Bui-Griffith, J. H.; Lu, W.; Tang, X.; Hai, T.; Fisher, K. E.; Williams, M. D.; Wistuba,, II; Waguespack, S. G.; Dorman, C. M.; Ludwig, M. S.; Graham, P. H.; Perrier, N. D.; Lee, J. E.; Grubbs, E. G.	2019	Surgery	165	1	58-63	10.1016/j.surg.2018.08.029
206	No association between germline and somatic	Screening for germline p53 mutations in pediatric and adult patients of high-risk groups in Poland	Fiszer-Maliszewska, L.; Czernik, J.; Sawicz-Birkowska, K.; Perek, D.; Kozera, M.; Wojciechowska, B.; Kazanowska, B.; Hudziec, P.; Kilar, E.	2000	Arch Immunol Ther Exp (Warsz)	48	4	309-15
207	No association between germline and somatic	p53 Tetramerization domain mutations: germline R342X and R342P, and somatic R337G identified in pediatric patients with Li-Fraumeni syndrome and a child with adrenocortical carcinoma	Fiszer-Maliszewska, L.; Kazanowska, B.; Padzik, J.	2009	Fam Cancer	8	4	541-6	10.1007/s10689-009-9284-2
208	No association between germline and somatic	The genomic landscape of phaeochromocytoma	Flynn, A.; Benn, D.; Clifton-Bligh, R.; Robinson, B.; Trainer, A. H.; James, P.; Hogg, A.; Waldeck, K.; George, J.; Li, J.; Fox, S. B.; Gill, A. J.; McArthur, G.; Hicks, R. J.; Tothill, R. W.	2015	J Pathol	236	1	78-89	10.1002/path.4503
209	No association between germline and somatic	Cousins not twins: intratumoural and intertumoural heterogeneity in syndromic neuroendocrine tumours	Flynn, A.; Dwight, T.; Benn, D.; Deb, S.; Colebatch, A. J.; Fox, S.; Harris, J.; Duncan, E. L.; Robinson, B.; Hogg, A.; Ellul, J.; To, H.; Duong, C.; Miller, J. A.; Yates, C.; James, P.; Trainer, A.; Gill, A. J.; Clifton-Bligh, R.; Hicks, R. J.; Tothill, R. W.	2017	J Pathol	242	3	273-283	10.1002/path.4900
210	No association between germline and somatic	Identification of TSC1 or TSC2 mutation limited to the tumor in three cases of solitary subependymal giant cell astrocytoma using next-generation sequencing technology	Fohlen, M.; Harzallah, I.; Polivka, M.; Giuliano, F.; Pons, L.; Streichenberger, N.; DorfmÃ¼ller, G.; Touraine, R.	2020	Childs Nerv Syst	36	5	961-965	10.1007/s00381-020-04551-4
211	No association between germline and somatic	Compromised BRCA1-PALB2 interaction is associated with breast cancer risk	Foo, T. K.; Tischkowitz, M.; Simhadri, S.; Boshari, T.; Zayed, N.; Burke, K. A.; Berman, S. H.; Blecua, P.; Riaz, N.; Huo, Y.; Ding, Y. C.; Neuhausen, S. L.; Weigelt, B.; Reis-Filho, J. S.; Foulkes, W. D.; Xia, B.	2017	Oncogene	36	29	4161-4170	10.1038/onc.2017.46
212	No association between germline and somatic	Circadian PERformance in breast cancer: a germline and somatic genetic study of PER3(VNTR) polymorphisms and gene co-expression	Fores-Martos, J.; Cervera-Vidal, R.; Sierra-Roca, J.; Lozano-Asencio, C.; Fedele, V.; Cornelissen, S.; Edvarsen, H.; Tadeo-Cervera, I.; Eroles, P.; Lluch, A.; Tabares-Seisdedos, R.; FalcÃ³, A.; Van't Veer, L. J.; Schmidt, M.; Quigley, D. A.; BÃ¸rresen-Dale, A. L.; Kristensen, V. N.; Balmain, A.; Climent, J.	2021	NPJ Breast Cancer	7	1	118	10.1038/s41523-021-00329-2
213	No association between germline and somatic	Germline MSH6 Mutation in a Patient With Two Independent Primary Glioblastomas	ForsstrÃ¶m, L. M.; Sumi, K.; MÃ¤kinen, M. J.; Oh, J. E.; Herva, R.; Kleihues, P.; Ohgaki, H.; Aaltonen, L. A.	2017	J Neuropathol Exp Neurol	76	10	848-853	10.1093/jnen/nlx066
214	No association between germline and somatic	Somatic mutations of the von Hippel-Lindau disease tumour suppressor gene in non-familial clear cell renal carcinoma	Foster, K.; Prowse, A.; van den Berg, A.; Fleming, S.; Hulsbeek, M. M.; Crossey, P. A.; Richards, F. M.; Cairns, P.; Affara, N. A.; Ferguson-Smith, M. A.; et al.,	1994	Hum Mol Genet	3	12	2169-73	10.1093/hmg/3.12.2169
215	No association between germline and somatic	Somatic and germline mutations of the BRCA2 gene in sporadic ovarian cancer	Foster, K. A.; Harrington, P.; Kerr, J.; Russell, P.; DiCioccio, R. A.; Scott, I. V.; Jacobs, I.; Chenevix-Trench, G.; Ponder, B. A.; Gayther, S. A.	1996	Cancer Res	56	16	3622-5
216	No association between germline and somatic	Mutation analysis of the BRAF, ARAF and RAF-1 genes in human colorectal adenocarcinomas	FransÃ©n, K.; KlintenÃ¤s, M.; OsterstrÃ¶m, A.; Dimberg, J.; Monstein, H. J.; SÃ¶derkvist, P.	2004	Carcinogenesis	25	4	527-33	10.1093/carcin/bgh049
217	No association between germline and somatic	Whole-genome sequencing of recurrent neuroblastoma reveals somatic mutations that affect key players in cancer progression and telomere maintenance	Fransson, S.; Martinez-Monleon, A.; Johansson, M.; SjÃ¶berg, R. M.; BjÃ¶rklund, C.; Ljungman, G.; Ek, T.; Kogner, P.; Martinsson, T.	2020	Sci Rep	10	1	22432	10.1038/s41598-020-78370-7
218	No association between germline and somatic	Multi-institutional Analysis of the Clinical and Genomic Characteristics of Black Patients with Metastatic Hormone-Sensitive Prostate Cancer	Freeman, M. N.; Jang, A.; Zhu, J.; Sanati, F.; Nandagopal, L.; Ravindranathan, D.; Desai, A.; Phone, A.; Nussenzveig, R.; Jaeger, E.; Caputo, S. A.; Koshkin, V. S.; Swami, U.; Basu, A.; Bilen, M. A.; Agarwal, N.; Sartor, O.; Burgess, E. F.; Barata, P. C.	2022	Oncologist	27	3	220-227	10.1093/oncolo/oyab057
219	No association between germline and somatic	WTX mutations can occur both early and late in the pathogenesis of Wilms tumour	Fukuzawa, R.; Holman, S. K.; Chow, C. W.; Savarirayan, R.; Reeve, A. E.; Robertson, S. P.	2010	J Med Genet	47	11	791-4	10.1136/jmg.2010.080663
220	No association between germline and somatic	Genetic analysis of a case of Helicobacter pylori-uninfected intramucosal gastric cancer in a family with hereditary diffuse gastric cancer	Funakoshi, T.; Miyamoto, S.; Kakiuchi, N.; Nikaido, M.; Setoyama, T.; Yokoyama, A.; Horimatsu, T.; Yamada, A.; Torishima, M.; Kosugi, S.; Yamada, H.; Sugimura, H.; Haga, H.; Sakai, Y.; Ogawa, S.; Seno, H.; Muto, M.; Chiba, T.	2019	Gastric Cancer	22	4	892-898	10.1007/s10120-018-00912-w
221	No association between germline and somatic	Whole exome sequencing reveals recurrent mutations in BRCA2 and FAT genes in acinar cell carcinomas of the pancreas	Furukawa, T.; Sakamoto, H.; Takeuchi, S.; Ameri, M.; Kuboki, Y.; Yamamoto, T.; Hatori, T.; Yamamoto, M.; Sugiyama, M.; Ohike, N.; Yamaguchi, H.; Shimizu, M.; Shibata, N.; Shimizu, K.; Shiratori, K.	2015	Sci Rep	5		8829	10.1038/srep08829
222	No association between germline and somatic	Clinicopathological and molecular features of hereditary leiomyomatosis and renal cell cancer-associated renal cell carcinomas	Furuya, M.; Iribe, Y.; Nagashima, Y.; Kambe, N.; Ohe, C.; Kinoshita, H.; Sato, C.; Kishida, T.; Okubo, Y.; Numakura, K.; Nanjo, H.; Nakaigawa, N.; Makiyama, K.; Hasumi, H.; Iwashita, H.; Ohta, J.; Kitamura, H.; Nakajima, T.; Yoshida, T.; Nakagawa, M.; Tanaka, R.; Yao, M.	2020	J Clin Pathol	73	12	819-825	10.1136/jclinpath-2020-206548
223	No association between germline and somatic	Pulmonary Neoplasms in Patients with Birt-Hogg-DubÃ© Syndrome: Histopathological Features and Genetic and Somatic Events	Furuya, M.; Tanaka, R.; Okudela, K.; Nakamura, S.; Yoshioka, H.; Tsuzuki, T.; Shibuya, R.; Yatera, K.; Shirasaki, H.; Sudo, Y.; Kimura, N.; Yamada, K.; Uematsu, S.; Kunimura, T.; Kato, I.; Nakatani, Y.	2016	PLoS One	11	3	e0151476	10.1371/journal.pone.0151476
224	No association between germline and somatic	Genetic analysis of lung cancer and the germline impact on somatic mutation burden	Gabriel, A. A. G.; Atkins, J. R.; Penha, R. C. C.; Smith-Byrne, K.; Gaborieau, V.; Voegele, C.; Abedi-Ardekani, B.; Milojevic, M.; Olaso, R.; Meyer, V.; Boland, A.; Deleuze, J. F.; Zaridze, D.; Mukeriya, A.; Swiatkowska, B.; Janout, V.; SchejbalovÃ¡, M.; Mates, D.; StojÅ¡iÄ‡, J.; Ognjanovic, M.; Witte, J. S.; Rashkin, S. R.; Kachuri, L.; Hung, R. J.; Kar, S.; Brennan, P.; Sertier, A. S.; Ferrari,…	2022	J Natl Cancer Inst				10.1093/jnci/djac087
225	No association between germline and somatic	Knudson's hypothesis revisited in Indian retinoblastoma patients	Gaikwad, N.; Vanniarajan, A.; Husain, A.; Jeyaram, I.; Thirumalairaj, K.; Santhi, R.; Muthukkaruppan, V.; Kim, U.	2015	Asia Pac J Clin Oncol	11	4	299-307	10.1111/ajco.12401
226	No association between germline and somatic	W43X SDHD mutation in sporadic head and neck paraganglioma	Galera-Ruiz, H.; Gonzalez-Campora, R.; Rey-Barrera, M.; RollÃ³n-Mayordomo, A.; Garcia-Escudero, A.; FernÃ¡ndez-Santos, J. M.; DeMiguel, M.; Galera-Davidson, H.	2008	Anal Quant Cytol Histol	30	2	119-23
227	No association between germline and somatic	Common polymorphisms in TP53 and MDM2 and the relationship to TP53 mutations and clinical outcomes in women with ovarian and peritoneal carcinomas	Galic, V.; Willner, J.; Wollan, M.; Garg, R.; Garcia, R.; Goff, B. A.; Gray, H. J.; Swisher, E. M.	2007	Genes Chromosomes Cancer	46	3	239-47	10.1002/gcc.20407
228	No association between germline and somatic	Multiple primary tumors of the upper aerodigestive tract: is there a role for constitutional mutations in the p53 gene?	Gallo, O.; Sardi, I.; Pepe, G.; Franchi, A.; Attanasio, M.; Giusti, B.; Bocciolini, C.; Abbate, R.	1999	Int J Cancer	82	2	180-6	10.1002/(sici)1097-0215(19990719)82:2<180::aid-ijc5>3.0.co;2-p
229	No association between germline and somatic	Prognostic factors value of germline and somatic brca in patients undergoing surgery for recurrent ovarian cancer with liver metastases	Gallotta, V.; Conte, C.; D'Indinosante, M.; Capoluongo, E.; Minucci, A.; De Rose, A. M.; Ardito, F.; Giuliante, F.; Di Giorgio, A.; Zannoni, G. F.; Fagotti, A.; Margreiter, C.; Scambia, G.; Ferrandina, G.	2019	Eur J Surg Oncol	45	11	2096-2102	10.1016/j.ejso.2019.06.023
230	No association between germline and somatic	Mutations of the VHL gene in sporadic renal cell carcinoma: definition of a risk factor for VHL patients to develop an RCC	Gallou, C.; Joly, D.; MÃ©jean, A.; Staroz, F.; Martin, N.; Tarlet, G.; Orfanelli, M. T.; Bouvier, R.; Droz, D.; ChrÃ©tien, Y.; MarÃ©chal, J. M.; Richard, S.; Junien, C.; BÃ©roud, C.	1999	Hum Mutat	13	6	464-75	10.1002/(sici)1098-1004(1999)13:6<464::Aid-humu6>3.0.Co;2-a
231	No association between germline and somatic	Spectrum of LKB1, EGFR, and KRAS mutations in chinese lung adenocarcinomas	Gao, B.; Sun, Y.; Zhang, J.; Ren, Y.; Fang, R.; Han, X.; Shen, L.; Liu, X. Y.; Pao, W.; Chen, H.; Ji, H.	2010	J Thorac Oncol	5	8	1130-5	10.1097/JTO.0b013e3181e05016
232	No association between germline and somatic	Renal medullary carcinomas: histopathologic phenotype associated with diverse genotypes	Gatalica, Z.; Lilleberg, S. L.; Monzon, F. A.; Koul, M. S.; Bridge, J. A.; Knezetic, J.; Legendre, B.; Sharma, P.; McCue, P. A.	2011	Hum Pathol	42	12	1979-88	10.1016/j.humpath.2011.02.026
233	No association between germline and somatic	Novel intronic germline FLCN gene mutation in a patient with multiple ipsilateral renal neoplasms	Gatalica, Z.; Lilleberg, S. L.; Vranic, S.; Eyzaguirre, E.; Orihuela, E.; Velagaleti, G.	2009	Hum Pathol	40	12	1813-9	10.1016/j.humpath.2009.03.026
234	No association between germline and somatic	Inactivation of the APC gene is constant in adrenocortical tumors from patients with familial adenomatous polyposis but not frequent in sporadic adrenocortical cancers	Gaujoux, S.; Pinson, S.; Gimenez-Roqueplo, A. P.; Amar, L.; Ragazzon, B.; Launay, P.; Meatchi, T.; LibÃ©, R.; Bertagna, X.; Audebourg, A.; Zucman-Rossi, J.; Tissier, F.; Bertherat, J.	2010	Clin Cancer Res	16	21	5133-41	10.1158/1078-0432.Ccr-10-1497
235	No association between germline and somatic	DNA damage repair pathway alterations in metastatic clear cell renal cell carcinoma and implications on systemic therapy	Ged, Y.; Chaim, J. L.; DiNatale, R. G.; Knezevic, A.; Kotecha, R. R.; Carlo, M. I.; Lee, C. H.; Foster, A.; Feldman, D. R.; Teo, M. Y.; Iyer, G.; Chan, T.; Patil, S.; Motzer, R. J.; Hakimi, A. A.; Voss, M. H.	2020	J Immunother Cancer	8	1		10.1136/jitc-2019-000230
236	No association between germline and somatic	Nonequivalent gene expression and copy number alterations in high-grade serous ovarian cancers with BRCA1 and BRCA2 mutations	George, J.; Alsop, K.; Etemadmoghadam, D.; Hondow, H.; Mikeska, T.; Dobrovic, A.; deFazio, A.; Smyth, G. K.; Levine, D. A.; Mitchell, G.; Bowtell, D. D.	2013	Clin Cancer Res	19	13	3474-84	10.1158/1078-0432.Ccr-13-0066
237	No association between germline and somatic	Global activation of oncogenic pathways underlies therapy resistance in diffuse midline glioma	Georgescu, M. M.; Islam, M. Z.; Li, Y.; Circu, M. L.; Traylor, J.; Notarianni, C. M.; Kline, C. N.; Burns, D. K.	2020	Acta Neuropathol Commun	8	1	111	10.1186/s40478-020-00992-9
238	No association between germline and somatic	Genetic and histologic spatiotemporal evolution of recurrent, multifocal, multicentric and metastatic glioblastoma	Georgescu, M. M.; Olar, A.	2020	Acta Neuropathol Commun	8	1	10	10.1186/s40478-020-0889-x
239	No association between germline and somatic	Somatic aberrations of mismatch repair genes as a cause of microsatellite-unstable cancers	Geurts-Giele, W. R.; Leenen, C. H.; Dubbink, H. J.; Meijssen, I. C.; Post, E.; Sleddens, H. F.; Kuipers, E. J.; Goverde, A.; van den Ouweland, A. M.; van Lier, M. G.; Steyerberg, E. W.; van Leerdam, M. E.; Wagner, A.; Dinjens, W. N.	2014	J Pathol	234	4	548-59	10.1002/path.4419
240	No association between germline and somatic	Genetic risk variants in the CDKN2A/B, RTEL1 and EGFR genes are associated with somatic biomarkers in glioma	Ghasimi, S.; Wibom, C.; Dahlin, A. M.; BrÃ¤nnstrÃ¶m, T.; Golovleva, I.; Andersson, U.; Melin, B.	2016	J Neurooncol	127	3	483-92	10.1007/s11060-016-2066-4
241	No association between germline and somatic	Rhabdoid tumor predisposition syndrome caused by SMARCB1 constitutional deletion: prenatal detection of new case of recurrence in siblings due to gonadal mosaicism	Gigante, L.; Paganini, I.; Frontali, M.; Ciabattoni, S.; Sangiuolo, F. C.; Papi, L.	2016	Fam Cancer	15	1	123-6	10.1007/s10689-015-9836-6
242	No association between germline and somatic	Genomic Profiles of De Novo High- and Low-Volume Metastatic Prostate Cancer: Results From a 2-Stage Feasibility and Prevalence Study in the STAMPEDE Trial	Gilson, C.; Ingleby, F.; Gilbert, D. C.; Parry, M. A.; Atako, N. B.; Ali, A.; Hoyle, A.; Clarke, N. W.; Gannon, M.; Wanstall, C.; Brawley, C.; Mason, M. D.; Malik, Z.; Simmons, A.; Loehr, A.; Parry-Jones, A.; Eeles, R.; Kote-Jarai, Z.; James, N. D.; Amos, C.; Parmar, M. K. B.; Langley, R. E.; Sydes, M. R.; Attard, G.; Chowdhury, S.	2020	JCO Precis Oncol	4		882-897	10.1200/po.19.00388
243	No association between germline and somatic	Mutations in the SDHB gene are associated with extra-adrenal and/or malignant phaeochromocytomas	Gimenez-Roqueplo, A. P.; Favier, J.; Rustin, P.; Rieubland, C.; Crespin, M.; Nau, V.; Khau Van Kien, P.; Corvol, P.; Plouin, P. F.; Jeunemaitre, X.	2003	Cancer Res	63	17	5615-21
244	No association between germline and somatic	Somatic and occult germ-line mutations in SDHD, a mitochondrial complex II gene, in nonfamilial pheochromocytoma	Gimm, O.; Armanios, M.; Dziema, H.; Neumann, H. P.; Eng, C.	2000	Cancer Res	60	24	6822-5
245	No association between germline and somatic	Somatic mutation and germline variants of MINPP1, a phosphatase gene located in proximity to PTEN on 10q23.3, in follicular thyroid carcinomas	Gimm, O.; Chi, H.; Dahia, P. L.; Perren, A.; Hinze, R.; Komminoth, P.; Dralle, H.; Reynolds, P. R.; Eng, C.	2001	J Clin Endocrinol Metab	86	4	1801-5	10.1210/jcem.86.4.7419
246	No association between germline and somatic	Mutation analysis of NTRK2 and NTRK3, encoding 2 tyrosine kinase receptors, in sporadic human medullary thyroid carcinoma reveals novel sequence variants	Gimm, O.; Dziema, H.; Brown, J.; de la Puente, A.; Hoang-Vu, C.; Dralle, H.; Plass, C.; Eng, C.	2001	Int J Cancer	92	1	70-4
247	No association between germline and somatic	Over-representation of a germline RET sequence variant in patients with sporadic medullary thyroid carcinoma and somatic RET codon 918 mutation	Gimm, O.; Neuberg, D. S.; Marsh, D. J.; Dahia, P. L.; Hoang-Vu, C.; Raue, F.; Hinze, R.; Dralle, H.; Eng, C.	1999	Oncogene	18	6	1369-73	10.1038/sj.onc.1202418
248	No association between germline and somatic	MSH6 and MUTYH deficiency is a frequent event in early-onset colorectal cancer	GirÃ¡ldez, M. D.; Balaguer, F.; Bujanda, L.; Cuatrecasas, M.; MuÃ±oz, J.; Alonso-Espinaco, V.; Larzabal, M.; Petit, A.; Gonzalo, V.; OcaÃ±a, T.; Moreira, L.; EnrÃ­quez-NavascuÃ©s, J. M.; Boland, C. R.; Goel, A.; Castells, A.; CastellvÃ­-Bel, S.	2010	Clin Cancer Res	16	22	5402-13	10.1158/1078-0432.Ccr-10-1491
249	No association between germline and somatic	Reconsideration of biallelic inactivation of the VHL tumour suppressor gene in hemangioblastomas of the central nervous system	GlÃ¤sker, S.; Bender, B. U.; Apel, T. W.; van Velthoven, V.; Mulligan, L. M.; Zentner, J.; Neumann, H. P.	2001	J Neurol Neurosurg Psychiatry	70	5	644-8	10.1136/jnnp.70.5.644
250	No association between germline and somatic	[The mutational spectra of gene p53 in different types of tumors]	Glazko, G. V.; Rogozin, I. B.; Sozinov, A. A.	1999	Tsitol Genet	33	3	14-20
251	No association between germline and somatic	Comprehensive Molecular Characterization and Response to Therapy in Fumarate Hydratase-Deficient Renal Cell Carcinoma	Gleeson, J. P.; Nikolovski, I.; Dinatale, R.; Zucker, M.; Knezevic, A.; Patil, S.; Ged, Y.; Kotecha, R. R.; Shapnik, N.; Murray, S.; Russo, P.; Coleman, J.; Lee, C. H.; Stadler, Z. K.; Hakimi, A. A.; Feldman, D. R.; Motzer, R. J.; Reznik, E.; Voss, M. H.; Chen, Y. B.; Carlo, M. I.	2021	Clin Cancer Res	27	10	2910-2919	10.1158/1078-0432.Ccr-20-4367
252	No association between germline and somatic	MTDH genetic variants in colorectal cancer patients	Gnosa, S.; Ticha, I.; Haapaniemi, S.; Sun, X. F.	2016	Sci Rep	6		23163	10.1038/srep23163
253	No association between germline and somatic	Overall Survival and Clinical Characteristics of BRCA-Associated Cholangiocarcinoma: A Multicenter Retrospective Study	Golan, T.; Raitses-Gurevich, M.; Kelley, R. K.; Bocobo, A. G.; Borgida, A.; Shroff, R. T.; Holter, S.; Gallinger, S.; Ahn, D. H.; Aderka, D.; Apurva, J.; Bekaii-Saab, T.; Friedman, E.; Javle, M.	2017	Oncologist	22	7	804-810	10.1634/theoncologist.2016-0415
254	No association between germline and somatic	Germline biallelic Mcm8 variants are associated with early-onset Lynch-like syndrome	Golubicki, M.; Bonjoch, L.; AcuÃ±a-Ochoa, J. G.; DÃ­az-Gay, M.; MuÃ±oz, J.; Cuatrecasas, M.; OcaÃ±a, T.; Iseas, S.; Mendez, G.; Cisterna, D.; Schubert, S. A.; Nielsen, M.; van Wezel, T.; Goldberg, Y.; Pikarsky, E.; Robbio, J.; Roca, E.; Castells, A.; Balaguer, F.; Antelo, M.; CastellvÃ­-Bel, S.	2020	JCI Insight	5	18		10.1172/jci.insight.140698
255	No association between germline and somatic	Comprehensive Genomic Characterization of Fifteen Early-Onset Lynch-Like Syndrome Colorectal Cancers	Golubicki, M.; DÃ­az-Gay, M.; Bonjoch, L.; Franch-ExpÃ³sito, S.; MuÃ±oz, J.; Cuatrecasas, M.; OcaÃ±a, T.; Iseas, S.; Mendez, G.; Carballido, M.; Robbio, J.; Cisterna, D.; Roca, E.; Castells, A.; Balaguer, F.; CastellvÃ­-Bel, S.; Antelo, M.	2021	Cancers (Basel)	13	6		10.3390/cancers13061259
256	No association between germline and somatic	RET oncogene mutations in medullary thyroid carcinoma in Mexican families	GonzÃ¡lez, B.; Salcedo, M.; Medrano, M. E.; Mantilla, A.; QuiÃ±Ã³nez, G.; BenÃ­tez-Bribiesca, L.; RodrÃ­guez-Cuevas, S.; Cabrera, L.; de LeÃ³n, B.; Altamirano, N.; Tapia, J.; Dawson, B.	2003	Arch Med Res	34	1	41-9	10.1016/s0188-4409(02)00461-7
257	No association between germline and somatic	Incidence and outcome of BRCA mutations in unselected patients with triple receptor-negative breast cancer	Gonzalez-Angulo, A. M.; Timms, K. M.; Liu, S.; Chen, H.; Litton, J. K.; Potter, J.; Lanchbury, J. S.; Stemke-Hale, K.; Hennessy, B. T.; Arun, B. K.; Hortobagyi, G. N.; Do, K. A.; Mills, G. B.; Meric-Bernstam, F.	2011	Clin Cancer Res	17	5	1082-9	10.1158/1078-0432.Ccr-10-2560
258	No association between germline and somatic	Prevalence of defective DNA mismatch repair and MSH6 mutation in an unselected series of endometrial cancers	Goodfellow, P. J.; Buttin, B. M.; Herzog, T. J.; Rader, J. S.; Gibb, R. K.; Swisher, E.; Look, K.; Walls, K. C.; Fan, M. Y.; Mutch, D. G.	2003	Proc Natl Acad Sci U S A	100	10	5908-13	10.1073/pnas.1030231100
259	No association between germline and somatic	Activating mutations in FGFR3 and HRAS reveal a shared genetic origin for congenital disorders and testicular tumors	Goriely, A.; Hansen, R. M.; Taylor, I. B.; Olesen, I. A.; Jacobsen, G. K.; McGowan, S. J.; Pfeifer, S. P.; McVean, G. A.; Rajpert-De Meyts, E.; Wilkie, A. O.	2009	Nat Genet	41	11	1247-52	10.1038/ng.470
260	No association between germline and somatic	Exome sequencing identifies nonsegregating nonsense ATM and PALB2 variants in familial pancreatic cancer	Grant, R. C.; Al-Sukhni, W.; Borgida, A. E.; Holter, S.; Kanji, Z. S.; McPherson, T.; Whelan, E.; Serra, S.; Trinh, Q. M.; Peltekova, V.; Stein, L. D.; McPherson, J. D.; Gallinger, S.	2013	Hum Genomics	7	1	11	10.1186/1479-7364-7-11
261	No association between germline and somatic	Loss of heterozygosity on chromosome 13q12-q14, BRCA-2 mutations and lack of BRCA-2 promoter hypermethylation in sporadic epithelial ovarian tumors	Gras, E.; Cortes, J.; Diez, O.; Alonso, C.; Matias-Guiu, X.; Baiget, M.; Prat, J.	2001	Cancer	92	4	787-95	10.1002/1097-0142(20010815)92:4<787::aid-cncr1384>3.0.co;2-4
262	No association between germline and somatic	Analysis of APC allelic imbalance/loss of heterozygosity and APC protein expression in cutaneous squamous cell carcinomas	Gray, S. E.; Kay, E. W.; Leader, M.; Mabruk, M.	2011	Cancer Genomics Proteomics	8	3	149-55
263	No association between germline and somatic	TP53 mutations in breast cancer associated with BRCA1 or BRCA2 germ-line mutations: distinctive spectrum and structural distribution	Greenblatt, M. S.; Chappuis, P. O.; Bond, J. P.; Hamel, N.; Foulkes, W. D.	2001	Cancer Res	61	10	4092-7
264	No association between germline and somatic	Constitutional LZTR1 mutation presenting with a unilateral vestibular schwannoma in a teenager	Gripp, K. W.; Baker, L.; Kandula, V.; Piatt, J.; Walter, A.; Chen, Z.; Messiaen, L.	2017	Clin Genet	92	5	540-543	10.1111/cge.13013
265	No association between germline and somatic	Genetic and epigenetic factors affect RET gene expression in breast cancer cell lines and influence survival in patients	Griseri, P.; Garrone, O.; Lo Sardo, A.; Monteverde, M.; Rusmini, M.; Tonissi, F.; Merlano, M.; Bruzzi, P.; Lo Nigro, C.; Ceccherini, I.	2016	Oncotarget	7	18	26465-79	10.18632/oncotarget.8417
266	No association between germline and somatic	Pathogenesis of adenocarcinoma in Peutz-Jeghers syndrome	Gruber, S. B.; Entius, M. M.; Petersen, G. M.; Laken, S. J.; Longo, P. A.; Boyer, R.; Levin, A. M.; Mujumdar, U. J.; Trent, J. M.; Kinzler, K. W.; Vogelstein, B.; Hamilton, S. R.; Polymeropoulos, M. H.; Offerhaus, G. J.; Giardiello, F. M.	1998	Cancer Res	58	23	5267-70
267	No association between germline and somatic	Molecular-cytogenetic analysis of HER-2/neu gene in BRCA1-associated breast cancers	Grushko, T. A.; Blackwood, M. A.; Schumm, P. L.; Hagos, F. G.; Adeyanju, M. O.; Feldman, M. D.; Sanders, M. O.; Weber, B. L.; Olopade, O. I.	2002	Cancer Res	62	5	1481-8
268	No association between germline and somatic	CDC73 mutations and parafibromin immunohistochemistry in parathyroid tumors: clinical correlations in a single-centre patient cohort	Guarnieri, V.; Battista, C.; Muscarella, L. A.; Bisceglia, M.; de Martino, D.; Baorda, F.; Maiello, E.; D'Agruma, L.; Chiodini, I.; Clemente, C.; Minisola, S.; Romagnoli, E.; Corbetta, S.; Viti, R.; Eller-Vainicher, C.; Spada, A.; Iacobellis, M.; Malavolta, N.; Carella, M.; Canaff, L.; Hendy, G. N.; Cole, D. E.; Scillitani, A.	2012	Cell Oncol (Dordr)	35	6	411-22	10.1007/s13402-012-0100-x
269	No association between germline and somatic	3P association (3PAs): Pituitary adenoma and pheochromocytoma/paraganglioma. A heterogeneous clinical syndrome associated with different gene mutations	Guerrero-PÃ©rez, F.; Fajardo, C.; Torres Vela, E.; GimÃ©nez-Palop, O.; Lisbona Gil, A.; MartÃ­n, T.; GonzÃ¡lez, N.; DÃ­ez, J. J.; Iglesias, P.; Robledo, M.; Villabona, C.	2019	Eur J Intern Med	69		14-19	10.1016/j.ejim.2019.08.005
270	No association between germline and somatic	JAK3 Variant, Immune Signatures, DNA Methylation, and Social Determinants Linked to Survival Racial Disparities in Head and Neck Cancer Patients	Guerrero-Preston, R.; Lawson, F.; Rodriguez-Torres, S.; Noordhuis, M. G.; Pirini, F.; Manuel, L.; Valle, B. L.; Hadar, T.; Rivera, B.; Folawiyo, O.; Baez, A.; Marchionni, L.; Koch, W. M.; Westra, W. H.; Kim, Y. J.; Eshleman, J. R.; Sidransky, D.	2019	Cancer Prev Res (Phila)	12	4	255-270	10.1158/1940-6207.Capr-17-0356
271	No association between germline and somatic	Molecular tumor testing in patients with Lynch-like syndrome reveals a de novo mosaic variant of a mismatch repair gene transmitted to offspring	Guillerm, E.; Svrcek, M.; Bardier-Dupas, A.; Basset, N.; Coulet, F.; Colas, C.	2020	Eur J Hum Genet	28	11	1624-1628	10.1038/s41431-020-0689-6
272	No association between germline and somatic	Molecular profiling of osteosarcoma in children and adolescents from different age groups using a next-generation sequencing panel	GuimarÃ£es, G. M.; Tesser-Gamba, F.; Petrilli, A. S.; Donato-Macedo, C. R. P.; Alves, M. T. S.; de Lima, F. T.; Garcia-Filho, R. J.; Oliveira, R.; Toledo, S. R. C.	2021	Cancer Genet	258-259		85-92	10.1016/j.cancergen.2021.10.002
273	No association between germline and somatic	Two cases of non-small cell lung cancer patients with somatic or germline EGFR R776H mutation	Guo, T.; Zhu, L.; Li, W.; Lin, R.; Ding, Y.; Kang, Q.; Shao, L.; Li, C.; Pan, X.	2021	Lung Cancer	161		94-97	10.1016/j.lungcan.2021.05.036
274	No association between germline and somatic	Whole-exome sequencing and immunohistochemistry findings in von Hippel-Lindau disease	Guo, X.; Gao, L.; Hong, X.; Guo, D.; Di, W.; Wang, X.; Xu, Z.; Xing, B.	2019	Mol Genet Genomic Med	7	9	e880	10.1002/mgg3.880
275	No association between germline and somatic	Hereditary TP53 codon 292 and somatic P16INK4A codon 94 mutations in a Li-Fraumeni syndrome family	GÃ¼ran, S.; Tunca, Y.; ImirzalioÄŸlu, N.	1999	Cancer Genet Cytogenet	113	2	145-51	10.1016/s0165-4608(98)00276-3
276	No association between germline and somatic	Causes and consequences of microsatellite instability in endometrial carcinoma	Gurin, C. C.; Federici, M. G.; Kang, L.; Boyd, J.	1999	Cancer Res	59	2	462-6
277	No association between germline and somatic	Somatic mutations and germline sequence variants in patients with familial colorectal cancer	Gylfe, A. E.; SirkiÃ¤, J.; Ahlsten, M.; JÃ¤rvinen, H.; Mecklin, J. P.; Karhu, A.; Aaltonen, L. A.	2010	Int J Cancer	127	12	2974-80	10.1002/ijc.25529
278	No association between germline and somatic	NRAS and BRAF mutations in cutaneous melanoma and the association with MC1R genotype: findings from Spanish and Austrian populations	Hacker, E.; Nagore, E.; Cerroni, L.; Woods, S. L.; Hayward, N. K.; Chapman, B.; Montgomery, G. W.; Soyer, H. P.; Whiteman, D. C.	2013	J Invest Dermatol	133	4	1027-33	10.1038/jid.2012.385
279	No association between germline and somatic	"Null pattern" of immunoreactivity in a Lynch syndrome-associated colon cancer due to germline MSH2 mutation and somatic MLH1 hypermethylation	Hagen, C. E.; Lefferts, J.; Hornick, J. L.; Srivastava, A.	2011	Am J Surg Pathol	35	12	1902-5	10.1097/PAS.0b013e318237c6ab
280	No association between germline and somatic	Genetic heterogeneity during breast cancer progression in young patients	Hagio, K.; Hatanaka, K. C.; Amano, T.; Matsuno, Y.; Hatanaka, Y.; Yamashita, H.	2021	Breast	60		206-213	10.1016/j.breast.2021.10.011
281	No association between germline and somatic	Germline mutations and somatic inactivation of TRIM28 in Wilms tumour	Halliday, B. J.; Fukuzawa, R.; Markie, D. M.; Grundy, R. G.; Ludgate, J. L.; Black, M. A.; Skeen, J. E.; Weeks, R. J.; Catchpoole, D. R.; Roberts, A. G. K.; Reeve, A. E.; Morison, I. M.	2018	PLoS Genet	14	6	e1007399	10.1371/journal.pgen.1007399
282	No association between germline and somatic	Double somatic mismatch repair gene pathogenic variants as common as Lynch syndrome among endometrial cancer patients	Hampel, H.; Pearlman, R.; de la Chapelle, A.; Pritchard, C. C.; Zhao, W.; Jones, D.; Yilmaz, A.; Chen, W.; Frankel, W. L.; Suarez, A. A.; Cosgrove, C.; Backes, F.; Copeland, L.; Fowler, J.; O'Malley, D.; Salani, R.; McElroy, J. P.; Stanich, P. P.; Goodfellow, P.; Cohn, D. E.	2021	Gynecol Oncol	160	1	161-168	10.1016/j.ygyno.2020.10.012
283	No association between germline and somatic	Clinical Characteristics of Patients With Pancreatic Cancer and Pathogenic ATM Alterations	Hannan, Z.; Yu, S.; Domchek, S.; Mamtani, R.; Reiss, K. A.	2021	JNCI Cancer Spectr	5	2		10.1093/jncics/pkaa121
284	No association between germline and somatic	Nature and nurture: a case of transcending haematological pre-malignancies in a pair of monozygotic twins adding possible clues on the pathogenesis of B-cell proliferations	Hansen, M. C.; Nyvold, C. G.; Roug, A. S.; Kjeldsen, E.; Villesen, P.; Nederby, L.; Hokland, P.	2015	Br J Haematol	169	3	391-400	10.1111/bjh.13305
285	No association between germline and somatic	Osteosarcoma and retinoblastoma: a shared chromosomal mechanism revealing recessive predisposition	Hansen, M. F.; Koufos, A.; Gallie, B. L.; Phillips, R. A.; Fodstad, O.; BrÃ¸gger, A.; Gedde-Dahl, T.; Cavenee, W. K.	1985	Proc Natl Acad Sci U S A	82	18	6216-20	10.1073/pnas.82.18.6216
286	No association between germline and somatic	Colon and endometrial cancers with mismatch repair deficiency can arise from somatic, rather than germline, mutations	Haraldsdottir, S.; Hampel, H.; Tomsic, J.; Frankel, W. L.; Pearlman, R.; de la Chapelle, A.; Pritchard, C. C.	2014	Gastroenterology	147	6	1308-1316.e1	10.1053/j.gastro.2014.08.041
287	No association between germline and somatic	Comprehensive population-wide analysis of Lynch syndrome in Iceland reveals founder mutations in MSH6 and PMS2	Haraldsdottir, S.; Rafnar, T.; Frankel, W. L.; Einarsdottir, S.; Sigurdsson, A.; Hampel, H.; Snaebjornsson, P.; Masson, G.; Weng, D.; Arngrimsson, R.; Kehr, B.; Yilmaz, A.; Haraldsson, S.; Sulem, P.; Stefansson, T.; Shields, P. G.; Sigurdsson, F.; Bekaii-Saab, T.; Moller, P. H.; Steinarsdottir, M.; Alexiusdottir, K.; Hitchins, M.; Pritchard, C. C.; de la Chapelle, A.; Jonasson, J. G.; Goldberg, R…	2017	Nat Commun	8		14755	10.1038/ncomms14755
288	No association between germline and somatic	Frequent mutation of BAP1 in metastasizing uveal melanomas	Harbour, J. W.; Onken, M. D.; Roberson, E. D.; Duan, S.; Cao, L.; Worley, L. A.; Council, M. L.; Matatall, K. A.; Helms, C.; Bowcock, A. M.	2010	Science	330	6009	1410-3	10.1126/science.1194472
289	No association between germline and somatic	BHD-associated kidney cancer exhibits unique molecular characteristics and a wide variety of variants in chromatin remodeling genes	Hasumi, H.; Furuya, M.; Tatsuno, K.; Yamamoto, S.; Baba, M.; Hasumi, Y.; Isono, Y.; Suzuki, K.; Jikuya, R.; Otake, S.; Muraoka, K.; Osaka, K.; Hayashi, N.; Makiyama, K.; Miyoshi, Y.; Kondo, K.; Nakaigawa, N.; Kawahara, T.; Izumi, K.; Teranishi, J.; Yumura, Y.; Uemura, H.; Nagashima, Y.; Metwalli, A. R.; Schmidt, L. S.; Aburatani, H.; Linehan, W. M.; Yao, M.	2018	Hum Mol Genet	27	15	2712-2724	10.1093/hmg/ddy181
290	No association between germline and somatic	Deleterious somatic variants in 473 consecutive individuals with ovarian cancer: results of the observational AGO-TR1 study (NCT02222883)	Hauke, J.; Hahnen, E.; Schneider, S.; Reuss, A.; Richters, L.; Kommoss, S.; Heimbach, A.; MarmÃ©, F.; Schmidt, S.; Prieske, K.; Gevensleben, H.; Burges, A.; Borde, J.; De Gregorio, N.; NÃ¼rnberg, P.; El-Balat, A.; Thiele, H.; Hilpert, F.; AltmÃ¼ller, J.; Meier, W.; Dietrich, D.; Kimmig, R.; Schoemig-Markiefka, B.; Kast, K.; Braicu, E.; Baumann, K.; Jackisch, C.; Park-Simon, T. W.; Ernst, C.; Hank…	2019	J Med Genet	56	9	574-580	10.1136/jmedgenet-2018-105930
291	No association between germline and somatic	Genomic analysis of the origins and evolution of multicentric diffuse lower-grade gliomas	Hayes, J.; Yu, Y.; Jalbert, L. E.; Mazor, T.; Jones, L. E.; Wood, M. D.; Walsh, K. M.; Bengtsson, H.; Hong, C.; Oberndorfer, S.; Roetzer, T.; Smirnov, I. V.; Clarke, J. L.; Aghi, M. K.; Chang, S. M.; Nelson, S. J.; Woehrer, A.; Phillips, J. J.; Solomon, D. A.; Costello, J. F.	2018	Neuro Oncol	20	5	632-641	10.1093/neuonc/nox205
292	No association between germline and somatic	Retained mismatch repair protein expression occurs in approximately 6% of microsatellite instability-high cancers and is associated with missense mutations in mismatch repair genes	Hechtman, J. F.; Rana, S.; Middha, S.; Stadler, Z. K.; Latham, A.; Benayed, R.; Soslow, R.; Ladanyi, M.; Yaeger, R.; Zehir, A.; Shia, J.	2020	Mod Pathol	33	5	871-879	10.1038/s41379-019-0414-6
293	No association between germline and somatic	Efficacy of novel immunotherapy regimens in patients with metastatic melanoma with germline CDKN2A mutations	Helgadottir, H.; Ghiorzo, P.; van Doorn, R.; Puig, S.; Levin, M.; Kefford, R.; Lauss, M.; Queirolo, P.; Pastorino, L.; Kapiteijn, E.; Potrony, M.; Carrera, C.; Olsson, H.; HÃ¶iom, V.; JÃ¶nsson, G.	2020	J Med Genet	57	5	316-321	10.1136/jmedgenet-2018-105610
294	No association between germline and somatic	Macrofollicular Variant of Follicular Thyroid Carcinoma (MV-FTC) with a Somatic DICER1 Gene Mutation: Case Report and Review of the Literature	Hellgren, L. S.; Hysek, M.; Jatta, K.; Zedenius, J.; Juhlin, C. C.	2021	Head Neck Pathol	15	2	668-675	10.1007/s12105-020-01208-1
295	No association between germline and somatic	Somatic mutations in BRCA1 and BRCA2 could expand the number of patients that benefit from poly (ADP ribose) polymerase inhibitors in ovarian cancer	Hennessy, B. T.; Timms, K. M.; Carey, M. S.; Gutin, A.; Meyer, L. A.; Flake, D. D., 2nd; Abkevich, V.; Potter, J.; Pruss, D.; Glenn, P.; Li, Y.; Li, J.; Gonzalez-Angulo, A. M.; McCune, K. S.; Markman, M.; Broaddus, R. R.; Lanchbury, J. S.; Lu, K. H.; Mills, G. B.	2010	J Clin Oncol	28	22	3570-6	10.1200/jco.2009.27.2997
296	No association between germline and somatic	Recurrent somatic DICER1 mutations in nonepithelial ovarian cancers	Heravi-Moussavi, A.; Anglesio, M. S.; Cheng, S. W.; Senz, J.; Yang, W.; Prentice, L.; Fejes, A. P.; Chow, C.; Tone, A.; Kalloger, S. E.; Hamel, N.; Roth, A.; Ha, G.; Wan, A. N.; Maines-Bandiera, S.; Salamanca, C.; Pasini, B.; Clarke, B. A.; Lee, A. F.; Lee, C. H.; Zhao, C.; Young, R. H.; Aparicio, S. A.; Sorensen, P. H.; Woo, M. M.; Boyd, N.; Jones, S. J.; Hirst, M.; Marra, M. A.; Gilks, B.; Shah…	2012	N Engl J Med	366	3	234-42	10.1056/NEJMoa1102903
297	No association between germline and somatic	Mutations in MLH1 are more frequent than in MSH2 in sporadic colorectal cancers with microsatellite instability	Herfarth, K. K.; Kodner, I. J.; Whelan, A. J.; Ivanovich, J. L.; Bracamontes, J. R.; Wells, S. A., Jr.; Goodfellow, P. J.	1997	Genes Chromosomes Cancer	18	1	42-9	10.1002/(sici)1098-2264(199701)18:1<42::aid-gcc5>3.0.co;2-1
298	No association between germline and somatic	Identification of New Genes Involved in Germline Predisposition to Early-Onset Gastric Cancer	Herrera-Pariente, C.; CapÃ³-GarcÃ­a, R.; DÃ­az-Gay, M.; Carballal, S.; MuÃ±oz, J.; Llach, J.; SÃ¡nchez, A.; Bonjoch, L.; Arnau-Collell, C.; Soares de Lima, Y.; Golubicki, M.; Jung, G.; Lozano, J. J.; Castells, A.; Balaguer, F.; Bujanda, L.; CastellvÃ­-Bel, S.; Moreira, L.	2021	Int J Mol Sci	22	3		10.3390/ijms22031310
299	No association between germline and somatic	Inactivation of BRCA1 and BRCA2 in ovarian cancer	Hilton, J. L.; Geisler, J. P.; Rathe, J. A.; Hattermann-Zogg, M. A.; DeYoung, B.; Buller, R. E.	2002	J Natl Cancer Inst	94	18	1396-406	10.1093/jnci/94.18.1396
300	No association between germline and somatic	The clinical importance of BRCAness in a population-based cohort of Danish epithelial ovarian cancer	HjortkjÃ¦r, M.; Malik Aagaard JÃ¸rgensen, M.; WaldstrÃ¸m, M.; Ã˜rnskov, D.; SÃ¸gaard-Andersen, E.; Jakobsen, A.; Dahl-Steffensen, K.	2019	Int J Gynecol Cancer	29	1	166-173	10.1136/ijgc-2018-000017
301	No association between germline and somatic	Prevalence of Lynch syndrome in women with mismatch repair-deficient ovarian cancer	Hodan, R.; Kingham, K.; Cotter, K.; Folkins, A. K.; Kurian, A. W.; Ford, J. M.; Longacre, T.	2021	Cancer Med	10	3	1012-1017	10.1002/cam4.3688
302	No association between germline and somatic	Germline and somatic genetic variability of oxysterol-related genes in breast cancer patients with early disease of the luminal subtype	HolÃ½, P.; HlavÃ¡Ä, V.; OstaÅ¡ov, P.; BrynychovÃ¡, V.; KoÅ¾evnikovovÃ¡, R.; TrnkovÃ¡, M.; KopeÄkovÃ¡, K.; MÄ›Å¡Å¥Ã¡kovÃ¡, S.; MrhalovÃ¡, M.; SouÄek, P.	2022	Biochimie	199		158-169	10.1016/j.biochi.2022.04.015
303	No association between germline and somatic	TERT promoter mutations in familial and sporadic melanoma	Horn, S.; Figl, A.; Rachakonda, P. S.; Fischer, C.; Sucker, A.; Gast, A.; Kadel, S.; Moll, I.; Nagore, E.; Hemminki, K.; Schadendorf, D.; Kumar, R.	2013	Science	339	6122	959-61	10.1126/science.1230062
304	No association between germline and somatic	Genome-wide germline correlates of the epigenetic landscape of prostate cancer	Houlahan, K. E.; Shiah, Y. J.; Gusev, A.; Yuan, J.; Ahmed, M.; Shetty, A.; Ramanand, S. G.; Yao, C. Q.; Bell, C.; O'Connor, E.; Huang, V.; Fraser, M.; Heisler, L. E.; Livingstone, J.; Yamaguchi, T. N.; Rouette, A.; Foucal, A.; Espiritu, S. M. G.; Sinha, A.; Sam, M.; Timms, L.; Johns, J.; Wong, A.; Murison, A.; Orain, M.; Picard, V.; Hovington, H.; Bergeron, A.; Lacombe, L.; Lupien, M.; Fradet, Y.…	2019	Nat Med	25	10	1615-1626	10.1038/s41591-019-0579-z
305	No association between germline and somatic	Renal carcinoma with giant mitochondria associated with germ-line mutation and somatic loss of the succinate dehydrogenase B gene	Housley, S. L.; Lindsay, R. S.; Young, B.; McConachie, M.; Mechan, D.; Baty, D.; Christie, L.; Rahilly, M.; Qureshi, K.; Fleming, S.	2010	Histopathology	56	3	405-8	10.1111/j.1365-2559.2010.03482.x
306	No association between germline and somatic	Modification of Homologous Recombination Deficiency Score Threshold and Association with Long-Term Survival in Epithelial Ovarian Cancer	How, J. A.; Jazaeri, A. A.; Fellman, B.; Daniels, M. S.; Penn, S.; Solimeno, C.; Yuan, Y.; Schmeler, K.; Lanchbury, J. S.; Timms, K.; Lu, K. H.; Yates, M. S.	2021	Cancers (Basel)	13	5		10.3390/cancers13050946
307	No association between germline and somatic	HRPT2 mutations are associated with malignancy in sporadic parathyroid tumours	Howell, V. M.; Haven, C. J.; Kahnoski, K.; Khoo, S. K.; Petillo, D.; Chen, J.; Fleuren, G. J.; Robinson, B. G.; Delbridge, L. W.; Philips, J.; Nelson, A. E.; Krause, U.; Hammje, K.; Dralle, H.; Hoang-Vu, C.; Gimm, O.; Marsh, D. J.; Morreau, H.; Teh, B. T.	2003	J Med Genet	40	9	657-63	10.1136/jmg.40.9.657
308	No association between germline and somatic	Novel DNA variants and mutation frequencies of hMLH1 and hMSH2 genes in colorectal cancer in the Northeast China population	Hu, F.; Li, D.; Wang, Y.; Yao, X.; Zhang, W.; Liang, J.; Lin, C.; Ren, J.; Zhu, L.; Wu, Z.; Li, S.; Li, Y.; Zhao, X.; Cui, B.; Dong, X.; Tian, S.; Zhao, Y.	2013	PLoS One	8	4	e60233	10.1371/journal.pone.0060233
309	No association between germline and somatic	Integrated case-control and somatic-germline interaction analyses of soft-tissue sarcoma	Hu, F.; Yu, Y.; Chen, J. S.; Hu, H.; Scheet, P.; Huff, C. D.	2021	J Med Genet	58	3	145-153	10.1136/jmedgenet-2019-106814
310	No association between germline and somatic	Association of a novel point mutation in MSH2 gene with familial multiple primary cancers	Hu, H.; Li, H.; Jiao, F.; Han, T.; Zhuo, M.; Cui, J.; Li, Y.; Wang, L.	2017	J Hematol Oncol	10	1	158	10.1186/s13045-017-0523-y
311	No association between germline and somatic	Germline copy number loss of UGT2B28 and gain of PLEC contribute to increased human esophageal squamous cell carcinoma risk in Southwest China	Hu, L.; Wu, Y.; Guan, X.; Liang, Y.; Yao, X.; Tan, D.; Bai, Y.; Xiong, G.; Yang, K.	2015	Am J Cancer Res	5	10	3056-71
312	No association between germline and somatic	Infrequent mutation in the BRCA2 gene in esophageal squamous cell carcinoma	Hu, N.; Li, G.; Li, W. J.; Wang, C.; Goldstein, A. M.; Tang, Z. Z.; Roth, M. J.; Dawsey, S. M.; Huang, J.; Wang, Q. H.; Ding, T.; Giffen, C.; Taylor, P. R.; Emmert-Buck, M. R.	2002	Clin Cancer Res	8	4	1121-6
313	No association between germline and somatic	Identification of Novel Variants in MEN1: A Study Conducted with Four Multiple Endocrine Neoplasia Type 1 Patients	Hu, W. M.; Zhang, Q.; Huang, L. H.; Mo, Z. H.; Long, X. D.; Yang, Y. B.; Yang, W. J.; Liu, J.; Jin, P.	2020	Horm Metab Res	52	11	788-795	10.1055/a-1147-1375
314	No association between germline and somatic	Evaluating Mismatch Repair Deficiency in Pancreatic Adenocarcinoma: Challenges and Recommendations	Hu, Z. I.; Shia, J.; Stadler, Z. K.; Varghese, A. M.; Capanu, M.; Salo-Mullen, E.; Lowery, M. A.; Diaz, L. A., Jr.; Mandelker, D.; Yu, K. H.; Zervoudakis, A.; Kelsen, D. P.; Iacobuzio-Donahue, C. A.; Klimstra, D. S.; Saltz, L. B.; Sahin, I. H.; O'Reilly, E. M.	2018	Clin Cancer Res	24	6	1326-1336	10.1158/1078-0432.Ccr-17-3099
315	No association between germline and somatic	RET protooncogene mutations in patients with apparently sporadic medullary thyroid carcinoma	Huang, C. N.; Wu, S. L.; Chang, T. C.; Huang, S. H.; Chang, T. J.	1998	J Formos Med Assoc	97	8	541-6
316	No association between germline and somatic	[Mutational studies of adenomatous polyposis coli gene in carcinomas from patients with hereditary non-polyposis colorectal cancers]	Huang, J.; Jin, S. H.; Zhang, S. Z.; Zheng, S.	2003	Zhonghua Yi Xue Yi Chuan Xue Za Zhi	20	3	196-9
317	No association between germline and somatic	Somatic mutations of APC gene in carcinomas from hereditary non-polyposis colorectal cancer patients	Huang, J.; Zheng, S.; Jin, S. H.; Zhang, S. Z.	2004	World J Gastroenterol	10	6	834-6	10.3748/wjg.v10.i6.834
318	No association between germline and somatic	Multiple epithelial and nonepithelial tumors in hereditary nonpolyposis colorectal cancer: characterization of germline and somatic mutations of the MSH2 gene and heterogeneity of replication error phenotypes	Huang, R. L.; Chao, C. F.; Ding, D. C.; Yu, C. P.; Chang, C. C.; Lai, H. C.; Yu, M. H.; Liu, H. S.; Chu, T. Y.	2004	Cancer Genet Cytogenet	153	2	108-14	10.1016/j.cancergencyto.2004.01.003
319	No association between germline and somatic	WT1 exon 1 deletion/insertion mutations in Wilms tumor patients, associated with di- and trinucleotide repeats and deletion hotspot consensus sequences	Huff, V.; Jaffe, N.; Saunders, G. F.; Strong, L. C.; Villalba, F.; Ruteshouser, E. C.	1995	Am J Hum Genet	56	1	84-90
320	No association between germline and somatic	Risk Haplotypes Uniquely Associated with Radioiodine-Refractory Thyroid Cancer Patients of High African Ancestry	Hurst, Z.; Liyanarachchi, S.; He, H.; Brock, P.; Sipos, J.; Nabhan, F.; Kebebew, E.; Green, P.; Cote, G. J.; Sherman, S.; Walker, C. J.; Chang, Y. S.; Xue, S.; Hollingsworth, B.; Li, W.; Genutis, L.; Menq, E.; de la Chapelle, A.; Jhiang, S. M.	2019	Thyroid	29	4	530-539	10.1089/thy.2018.0687
321	No association between germline and somatic	The molecular basis of EPCAM expression loss in Lynch syndrome-associated tumors	Huth, C.; Kloor, M.; Voigt, A. Y.; Bozukova, G.; Evers, C.; Gaspar, H.; Tariverdian, M.; Schirmacher, P.; von Knebel Doeberitz, M.; BlÃ¤ker, H.	2012	Mod Pathol	25	6	911-6	10.1038/modpathol.2012.30
322	No association between germline and somatic	Genomic profiles of lung cancer associated with idiopathic pulmonary fibrosis	Hwang, J. A.; Kim, D.; Chun, S. M.; Bae, S.; Song, J. S.; Kim, M. Y.; Koo, H. J.; Song, J. W.; Kim, W. S.; Lee, J. C.; Kim, H. R.; Choi, C. M.; Jang, S. J.	2018	J Pathol	244	1	25-35	10.1002/path.4978
323	No association between germline and somatic	Detailed analysis of genetic alterations in colorectal tumors from patients with and without familial adenomatous polyposis (FAP)	Ichii, S.; Takeda, S.; Horii, A.; Nakatsuru, S.; Miyoshi, Y.; Emi, M.; Fujiwara, Y.; Koyama, K.; Furuyama, J.; Utsunomiya, J.; et al.,	1993	Oncogene	8	9	2399-405
324	No association between germline and somatic	p73 at chromosome 1p36.3 is lost in advanced stage neuroblastoma but its mutation is infrequent	Ichimiya, S.; Nimura, Y.; Kageyama, H.; Takada, N.; Sunahara, M.; Shishikura, T.; Nakamura, Y.; Sakiyama, S.; Seki, N.; Ohira, M.; Kaneko, Y.; McKeon, F.; Caput, D.; Nakagawara, A.	1999	Oncogene	18	4	1061-6	10.1038/sj.onc.1202390
325	No association between germline and somatic	Parent-of-origin effect of hypomorphic pathogenic variants and somatic mosaicism impact on phenotypic expression of retinoblastoma	Imperatore, V.; Pinto, A. M.; Gelli, E.; Trevisson, E.; Morbidoni, V.; Frullanti, E.; Hadjistilianou, T.; De Francesco, S.; Toti, P.; Gusson, E.; Roversi, G.; Accogli, A.; Capra, V.; Mencarelli, M. A.; Renieri, A.; Ariani, F.	2018	Eur J Hum Genet	26	7	1026-1037	10.1038/s41431-017-0054-6
326	No association between germline and somatic	Genetic and clinical landscape of breast cancers with germline BRCA1/2 variants	Inagaki-Kawata, Y.; Yoshida, K.; Kawaguchi-Sakita, N.; Kawashima, M.; Nishimura, T.; Senda, N.; Shiozawa, Y.; Takeuchi, Y.; Inoue, Y.; Sato-Otsubo, A.; Fujii, Y.; Nannya, Y.; Suzuki, E.; Takada, M.; Tanaka, H.; Shiraishi, Y.; Chiba, K.; Kataoka, Y.; Torii, M.; Yoshibayashi, H.; Yamagami, K.; Okamura, R.; Moriguchi, Y.; Kato, H.; Tsuyuki, S.; Yamauchi, A.; Suwa, H.; Inamoto, T.; Miyano, S.; Ogawa,…	2020	Commun Biol	3	1	578	10.1038/s42003-020-01301-9
327	No association between germline and somatic	High incidence of loss of heterozygosity in breast tumors from carriers of the BRCA2 999del5 mutation	Ingvarsson, S.; Geirsdottir, E. K.; Johannesdottir, G.; SigbjÃ¶rnsdÃ³ttir, B. I.; Eiriksdottir, G.; Ragnarsson, G.; Agnarsson, B. A.; Gudmundsson, J.; Jonasson, J. G.; Sigurdsson, A.; Egilsson, V.; Barkardottir, R. B.	1998	Cancer Res	58	19	4421-5
328	No association between germline and somatic	Mutation analysis of the CHK2 gene in breast carcinoma and other cancers	Ingvarsson, S.; Sigbjornsdottir, B. I.; Huiping, C.; Hafsteinsdottir, S. H.; Ragnarsson, G.; Barkardottir, R. B.; Arason, A.; Egilsson, V.; Bergthorsson, J. T.	2002	Breast Cancer Res	4	3	R4	10.1186/bcr435
329	No association between germline and somatic	Characterization of chronic lymphocytic leukemia/small lymphocytic lymphoma (CLL/SLL) in Shanghai, China: molecular and cytogenetic characteristics, IgV gene restriction and hypermutation patterns	Irons, R. D.; Le, A.; Bao, L.; Zhu, X.; Ryder, J.; Wang, X. Q.; Ji, M.; Chen, Y.; Wu, X.; Lin, G.	2009	Leuk Res	33	12	1599-603	10.1016/j.leukres.2008.12.021
330	No association between germline and somatic	Efficacy of Radium-223 in Bone-metastatic Castration-resistant Prostate Cancer with and Without Homologous Repair Gene Defects	Isaacsson Velho, P.; Qazi, F.; Hassan, S.; Carducci, M. A.; Denmeade, S. R.; Markowski, M. C.; Thorek, D. L.; DeWeese, T. L.; Song, D. Y.; Tran, P. T.; Eisenberger, M. A.; Antonarakis, E. S.	2019	Eur Urol	76	2	170-176	10.1016/j.eururo.2018.09.040
331	No association between germline and somatic	De novo childhood myelodysplastic/myeloproliferative disease with unique molecular characteristics	Ismael, O.; Shimada, A.; Hama, A.; Elshazley, M.; Muramatsu, H.; Goto, A.; Sakaguchi, H.; Tanaka, M.; Takahashi, Y.; Yinyan, X.; Fukuda, M.; Miyajima, Y.; Yamashita, Y.; Horibe, K.; Hanada, R.; Ito, M.; Kojima, S.	2012	Br J Haematol	158	1	129-37	10.1111/j.1365-2141.2012.09140.x
332	No association between germline and somatic	SDHA loss of function mutations in a subset of young adult wild-type gastrointestinal stromal tumors	Italiano, A.; Chen, C. L.; Sung, Y. S.; Singer, S.; DeMatteo, R. P.; LaQuaglia, M. P.; Besmer, P.; Socci, N.; Antonescu, C. R.	2012	BMC Cancer	12		408	10.1186/1471-2407-12-408
333	No association between germline and somatic	Somatic mutation of the APC gene in thyroid carcinoma associated with familial adenomatous polyposis	Iwama, T.; Konishi, M.; Iijima, T.; Yoshinaga, K.; Tominaga, T.; Koike, M.; Miyaki, M.	1999	Jpn J Cancer Res	90	4	372-6	10.1111/j.1349-7006.1999.tb00757.x
334	No association between germline and somatic	Elucidating the molecular pathogenesis of glioma: integrated germline and somatic profiling of a familial glioma case series	Jacobs, D. I.; Fukumura, K.; Bainbridge, M. N.; Armstrong, G. N.; Tsavachidis, S.; Gu, X.; Doddapaneni, H. V.; Hu, J.; Jayaseelan, J. C.; Muzny, D. M.; Huse, J. T.; Bondy, M. L.	2018	Neuro Oncol	20	12	1625-1633	10.1093/neuonc/noy119
335	No association between germline and somatic	Somatic and germline activating mutations of the ALK kinase receptor in neuroblastoma	Janoueix-Lerosey, I.; Lequin, D.; BrugiÃ¨res, L.; Ribeiro, A.; de Pontual, L.; Combaret, V.; Raynal, V.; Puisieux, A.; Schleiermacher, G.; Pierron, G.; Valteau-Couanet, D.; Frebourg, T.; Michon, J.; Lyonnet, S.; Amiel, J.; Delattre, O.	2008	Nature	455	7215	967-70	10.1038/nature07398
336	No association between germline and somatic	Whole Gene Capture Analysis of 15 CRC Susceptibility Genes in Suspected Lynch Syndrome Patients	Jansen, A. M.; Geilenkirchen, M. A.; van Wezel, T.; Jagmohan-Changur, S. C.; Ruano, D.; van der Klift, H. M.; van den Akker, B. E.; Laros, J. F.; van Galen, M.; Wagner, A.; Letteboer, T. G.; GÃ³mez-GarcÃ­a, E. B.; Tops, C. M.; Vasen, H. F.; Devilee, P.; Hes, F. J.; Morreau, H.; Wijnen, J. T.	2016	PLoS One	11	6	e0157381	10.1371/journal.pone.0157381
337	No association between germline and somatic	Combined mismatch repair and POLE/POLD1 defects explain unresolved suspected Lynch syndrome cancers	Jansen, A. M.; van Wezel, T.; van den Akker, B. E.; Ventayol Garcia, M.; Ruano, D.; Tops, C. M.; Wagner, A.; Letteboer, T. G.; GÃ³mez-GarcÃ­a, E. B.; Devilee, P.; Wijnen, J. T.; Hes, F. J.; Morreau, H.	2016	Eur J Hum Genet	24	7	1089-92	10.1038/ejhg.2015.252
338	No association between germline and somatic	Unicryptal loss of heterozygosity in hereditary non-polyposis colorectal cancer	Jass, J. R.; Edgar, S.	1994	Pathology	26	4	414-7	10.1080/00313029400169102
339	No association between germline and somatic	Olaparib Monotherapy for Previously Treated Pancreatic Cancer With DNA Damage Repair Genetic Alterations Other Than Germline BRCA Variants: Findings From 2 Phase 2 Nonrandomized Clinical Trials	Javle, M.; Shacham-Shmueli, E.; Xiao, L.; Varadhachary, G.; Halpern, N.; Fogelman, D.; Boursi, B.; Uruba, S.; Margalit, O.; Wolff, R. A.; Golan, T.	2021	JAMA Oncol	7	5	693-699	10.1001/jamaoncol.2021.0006
340	No association between germline and somatic	Common SNP in pre-miR-146a decreases mature miR expression and predisposes to papillary thyroid carcinoma	Jazdzewski, K.; Murray, E. L.; Franssila, K.; Jarzab, B.; Schoenberg, D. R.; de la Chapelle, A.	2008	Proc Natl Acad Sci U S A	105	20	7269-74	10.1073/pnas.0802682105
341	No association between germline and somatic	Microsatellite instability and mutations in DNA mismatch repair genes in sporadic colorectal cancers	Jeong, S. Y.; Shin, K. H.; Shin, J. H.; Ku, J. L.; Shin, Y. K.; Park, S. Y.; Kim, W. H.; Park, J. G.	2003	Dis Colon Rectum	46	8	1069-77	10.1007/s10350-004-7282-x
342	No association between germline and somatic	Germline and tumor BRCA1/2 pathogenic variants in Chinese triple-negative breast carcinomas	Ji, G.; Bao, L.; Yao, Q.; Zhang, J.; Zhu, X.; Bai, Q.; Shao, Z.; Yang, W.; Zhou, X.	2021	J Cancer Res Clin Oncol	147	10	2935-2944	10.1007/s00432-021-03696-2
343	No association between germline and somatic	Homologous recombination repair gene mutations in Chinese localized and locally advanced prostate cancer patients	Jiang, X.; Hu, X.; Gu, Y.; Li, Y.; Jin, M.; Zhao, H.; Gao, R.; Huang, Z.; Lu, J.	2021	Pathol Res Pract	224		153507	10.1016/j.prp.2021.153507
344	No association between germline and somatic	Replication error in colorectal carcinoma: association with loss of heterozygosity at mismatch repair loci and clinicopathological variables	Johannsdottir, J. T.; Bergthorsson, J. T.; Gretarsdottir, S.; Kristjansson, A. K.; Ragnarsson, G.; Jonasson, J. G.; Egilsson, V.; Ingvarsson, S.	1999	Anticancer Res	19	3a	1821-6
345	No association between germline and somatic	A search for evidence of somatic mutations in the NF1 gene	John, A. M.; Ruggieri, M.; Ferner, R.; Upadhyaya, M.	2000	J Med Genet	37	1	44-9	10.1136/jmg.37.1.44
346	No association between germline and somatic	Analysis of somatic molecular changes, clinicopathological features, family history, and germline mutations in colorectal cancer families: evidence for efficient diagnosis of HNPCC and for the existence of distinct groups of non-HNPCC families	Johnson, V.; Lipton, L. R.; Cummings, C.; Eftekhar Sadat, A. T.; Izatt, L.; Hodgson, S. V.; Talbot, I. C.; Thomas, H. J.; Silver, A. J.; Tomlinson, I. P.	2005	J Med Genet	42	10	756-62	10.1136/jmg.2005.031245
347	No association between germline and somatic	Genomic Correlates of Disease Progression and Treatment Response in Prospectively Characterized Gliomas	Jonsson, P.; Lin, A. L.; Young, R. J.; DiStefano, N. M.; Hyman, D. M.; Li, B. T.; Berger, M. F.; Zehir, A.; Ladanyi, M.; Solit, D. B.; Arnold, A. G.; Stadler, Z. K.; Mandelker, D.; Goldberg, M. E.; Chmielecki, J.; Pourmaleki, M.; Ogilvie, S. Q.; Chavan, S. S.; McKeown, A. T.; Manne, M.; Hyde, A.; Beal, K.; Yang, T. J.; Nolan, C. P.; Pentsova, E.; Omuro, A.; Gavrilovic, I. T.; Kaley, T. J.; Diamon…	2019	Clin Cancer Res	25	18	5537-5547	10.1158/1078-0432.Ccr-19-0032
348	No association between germline and somatic	Simultaneous germline and somatic sequencing in ovarian carcinoma: mutation rate and impact on clinical decision-making	Jorge, S.; McFaddin, A. S.; Doll, K. M.; Pennington, K. P.; Norquist, B. M.; Bennett, R. L.; Pritchard, C. C.; Swisher, E. M.	2020	Gynecol Oncol	156	3	517-522	10.1016/j.ygyno.2019.12.010
349	No association between germline and somatic	Homologous recombination in lung cancer, germline and somatic mutations, clinical and phenotype characterization	Kadouri, L.; Rottenberg, Y.; Zick, A.; Hamburger, T.; Lipson, D.; Peretz, T.; Nechushtan, H.	2019	Lung Cancer	137		48-51	10.1016/j.lungcan.2019.09.008
350	No association between germline and somatic	Prevalence and clinicopathological/molecular characteristics of mismatch repair protein-deficient tumours among surgically treated patients with prostate cancer in a Japanese hospital-based population	Kagawa, M.; Kawakami, S.; Yamamoto, A.; Suzuki, O.; Eguchi, H.; Okazaki, Y.; Akagi, K.; Tamaru, J. I.; Arai, T.; Yamaguchi, T.; Ishida, H.	2021	Jpn J Clin Oncol	51	4	639-645	10.1093/jjco/hyaa207
351	No association between germline and somatic	Loss of heterozygosity at the ATBF1-A locus located in the 16q22 minimal region in breast cancer	Kai, K.; Zhang, Z.; Yamashita, H.; Yamamoto, Y.; Miura, Y.; Iwase, H.	2008	BMC Cancer	8		262	10.1186/1471-2407-8-262
352	No association between germline and somatic	Somatic deletions in hereditary breast cancers implicate 13q21 as a putative novel breast cancer susceptibility locus	Kainu, T.; Juo, S. H.; Desper, R.; Schaffer, A. A.; Gillanders, E.; Rozenblum, E.; Freas-Lutz, D.; Weaver, D.; Stephan, D.; Bailey-Wilson, J.; Kallioniemi, O. P.; Tirkkonen, M.; SyrjÃ¤koski, K.; KuukasjÃ¤rvi, T.; Koivisto, P.; Karhu, R.; Holli, K.; Arason, A.; Johannesdottir, G.; Bergthorsson, J. T.; Johannsdottir, H.; Egilsson, V.; Barkardottir, R. B.; Johannsson, O.; Haraldsson, K.; Sandberg, T…	2000	Proc Natl Acad Sci U S A	97	17	9603-8	10.1073/pnas.97.17.9603
353	No association between germline and somatic	Cribriform-morular variant of papillary thyroid carcinoma: ultrastructural study and somatic/germline mutation analysis of the APC gene	Kameyama, K.; Mukai, M.; Takami, H.; Ito, K.	2004	Ultrastruct Pathol	28	2	97-102	10.1080/01913120490431435
354	No association between germline and somatic	DNA copy number profiling reveals extensive genomic loss in hereditary BRCA1 and BRCA2 ovarian carcinomas	Kamieniak, M. M.; MuÃ±oz-Repeto, I.; Rico, D.; Osorio, A.; Urioste, M.; GarcÃ­a-Donas, J.; Hernando, S.; Robles-DÃ­az, L.; RamÃ³n, Y. Cajal T.; Cazorla, A.; SÃ¡ez, R.; GarcÃ­a-Bueno, J. M.; Domingo, S.; Borrego, S.; Palacios, J.; van de Wiel, M. A.; Ylstra, B.; BenÃ­tez, J.; GarcÃ­a, M. J.	2013	Br J Cancer	108	8	1732-42	10.1038/bjc.2013.141
355	No association between germline and somatic	Molecular Profiles of Breast Cancer in a Single Institution	Kamio, T.; Kamio, H.; Aoki, T.; Ondo, Y.; Uchiyama, T.; Yamamoto-Shimojima, K.; Watanabe, M.; Okamoto, T.; Kanno, H.; Yamamoto, T.	2020	Anticancer Res	40	8	4567-4570	10.21873/anticanres.14462
356	No association between germline and somatic	Association of a novel constitutional translocation t(1q;3q) with familial renal cell carcinoma	Kanayama, H.; Lui, W. O.; Takahashi, M.; Naroda, T.; Kedra, D.; Wong, F. K.; Kuroki, Y.; Nakahori, Y.; Larsson, C.; Kagawa, S.; Teh, B. T.	2001	J Med Genet	38	3	165-70	10.1136/jmg.38.3.165
357	No association between germline and somatic	Integrated analysis of germline and somatic variants in ovarian cancer	Kanchi, K. L.; Johnson, K. J.; Lu, C.; McLellan, M. D.; Leiserson, M. D.; Wendl, M. C.; Zhang, Q.; Koboldt, D. C.; Xie, M.; Kandoth, C.; McMichael, J. F.; Wyczalkowski, M. A.; Larson, D. E.; Schmidt, H. K.; Miller, C. A.; Fulton, R. S.; Spellman, P. T.; Mardis, E. R.; Druley, T. E.; Graubert, T. A.; Goodfellow, P. J.; Raphael, B. J.; Wilson, R. K.; Ding, L.	2014	Nat Commun	5		3156	10.1038/ncomms4156
358	No association between germline and somatic	Lynch-like syndrome: characterization and comparison with EPCAM deletion carriers	Kang, S. Y.; Park, C. K.; Chang, D. K.; Kim, J. W.; Son, H. J.; Cho, Y. B.; Yun, S. H.; Kim, H. C.; Kwon, M.; Kim, K. M.	2015	Int J Cancer	136	7	1568-78	10.1002/ijc.29133
359	No association between germline and somatic	Genetic Analysis of Mismatch Repair Genes Alterations in Extramammary Paget Disease	Kang, Z.; Xu, F.; Zhu, Y.; Fu, P.; Zhang, Q. A.; Hu, T.; Li, X.; Zhang, Q.; Wu, Z.; Zhang, X.; Wang, H.; Xu, J.; Fang, Z.; Guan, M.	2016	Am J Surg Pathol	40	11	1517-1525	10.1097/pas.0000000000000709
360	No association between germline and somatic	Molecular genetic diagnosis of von Hippel-Lindau disease: analysis of five Japanese families	Kanno, H.; Shuin, T.; Kondo, K.; Ito, S.; Hosaka, M.; Torigoe, S.; Fujii, S.; Tanaka, Y.; Yamamoto, I.; Kim, I.; Yao, M.	1996	Jpn J Cancer Res	87	5	423-8	10.1111/j.1349-7006.1996.tb00240.x
361	No association between germline and somatic	Mutations in the retinoblastoma gene and their expression in somatic and tumor cells of patients with hereditary retinoblastoma	Kato, M. V.; Ishizaki, K.; Toguchida, J.; Kaneko, A.; Takayama, J.; Tanooka, H.; Kato, T.; Shimizu, T.; Sasaki, M. S.	1994	Hum Mutat	3	1	44-51	10.1002/humu.1380030108
362	No association between germline and somatic	TP53 codon 72 polymorphism is associated with FGFR3 and RAS mutation in non-muscle-invasive bladder cancer	Kawahara, T.; Kojima, T.; Kandori, S.; Kurobe, M.; Yoshino, T.; Kimura, T.; Nagumo, Y.; Ishituka, R.; Mitsuzuka, K.; Narita, S.; Kobayashi, T.; Matsui, Y.; Ogawa, O.; Sugimoto, M.; Miyazaki, J.; Nishiyama, H.	2019	PLoS One	14	8	e0220173	10.1371/journal.pone.0220173
363	No association between germline and somatic	Childhood Rhabdomyosarcoma of the Female Genital Tract: Association with Pathogenic DICER1 Variation, Clinicopathological Features, and Outcomes	Kebudi, R.; Dural, O.; Bay, S. B.; Gorgun, O.; Onder, S.; Bilgic, B.; Yilmaz, I.; Iribas, A.; Arndt, C. A.; Harris, A. K.; Field, A.; Schultz, K. A. P.; Hill, D. A.	2021	J Pediatr Adolesc Gynecol	34	4	449-453	10.1016/j.jpag.2021.01.011
364	No association between germline and somatic	Loss of Heterozygosity in BRCA1 and BRCA2 Genes in Patients with Ovarian Cancer and Probability of Its Use for Clinical Classification of Variations	Kechin, A. A.; Boyarskikh, U. A.; Ermolenko, N. A.; Tyulyandina, A. S.; Lazareva, D. G.; Avdalyan, A. M.; Tyulyandin, S. A.; Kushlinskii, N. E.; Filipenko, M. L.	2018	Bull Exp Biol Med	165	1	94-100	10.1007/s10517-018-4107-9
365	No association between germline and somatic	Surveillance for early detection of aggressive parathyroid disease: carcinoma and atypical adenoma in familial isolated hyperparathyroidism associated with a germline HRPT2 mutation	Kelly, T. G.; Shattuck, T. M.; Reyes-Mugica, M.; Stewart, A. F.; Simonds, W. F.; Udelsman, R.; Arnold, A.; Carpenter, T. O.	2006	J Bone Miner Res	21	10	1666-71	10.1359/jbmr.060702
366	No association between germline and somatic	Exonic sequencing and MLH3 gene expression analysis of breast cancer patients	Khailany, R. A.; Ozaslan, M.	2021	Cell Mol Biol (Noisy-le-grand)	67	3	35-43	10.14715/cmb/2021.67.3.5
367	No association between germline and somatic	Quantification of Thyroid Cancer and Multinodular Goiter Risk in the DICER1 Syndrome: A Family-Based Cohort Study	Khan, N. E.; Bauer, A. J.; Schultz, K. A. P.; Doros, L.; Decastro, R. M.; Ling, A.; Lodish, M. B.; Harney, L. A.; Kase, R. G.; Carr, A. G.; Rossi, C. T.; Field, A.; Harris, A. K.; Williams, G. M.; Dehner, L. P.; Messinger, Y. H.; Hill, D. A.; Stewart, D. R.	2017	J Clin Endocrinol Metab	102	5	1614-1622	10.1210/jc.2016-2954
368	No association between germline and somatic	Clinical and genetic studies of Birt-Hogg-DubÃ© syndrome	Khoo, S. K.; Giraud, S.; Kahnoski, K.; Chen, J.; Motorna, O.; Nickolov, R.; Binet, O.; Lambert, D.; Friedel, J.; LÃ©vy, R.; Ferlicot, S.; Wolkenstein, P.; Hammel, P.; Bergerheim, U.; Hedblad, M. A.; Bradley, M.; Teh, B. T.; NordenskjÃ¶ld, M.; Richard, S.	2002	J Med Genet	39	12	906-12	10.1136/jmg.39.12.906
369	No association between germline and somatic	Two cases of nevoid basal cell carcinoma syndrome associated with meningioma caused by a PTCH1 or SUFU germline mutation	Kijima, C.; Miyashita, T.; Suzuki, M.; Oka, H.; Fujii, K.	2012	Fam Cancer	11	4	565-70	10.1007/s10689-012-9548-0
370	No association between germline and somatic	Analysis of genomic pathogenesis according to the revised Bethesda guidelines and additional criteria	Kim, J. C.; Kim, J. H.; Ha, Y. J.; Kim, C. W.; Tak, K. H.; Yoon, Y. S.; Kwon, Y. H.; Roh, S. A.; Cho, D. H.; Kim, S. K.; Kim, S. Y.; Kim, Y. S.	2021	J Cancer Res Clin Oncol	147	1	117-128	10.1007/s00432-020-03391-8
371	No association between germline and somatic	Germline and Somatic BRCA1/2 Gene Mutational Status and Clinical Outcomes in Epithelial Peritoneal, Ovarian, and Fallopian Tube Cancer: Over a Decade of Experience in a Single Institution in Korea	Kim, S. I.; Lee, M.; Kim, H. S.; Chung, H. H.; Kim, J. W.; Park, N. H.; Song, Y. S.	2020	Cancer Res Treat	52	4	1229-1241	10.4143/crt.2020.557
372	No association between germline and somatic	Determining homologous recombination deficiency scores with whole exome sequencing and their association with responses to neoadjuvant chemotherapy in breast cancer	Kim, S. J.; Sota, Y.; Naoi, Y.; Honma, K.; Kagara, N.; Miyake, T.; Shimoda, M.; Tanei, T.; Seno, S.; Matsuda, H.; Noguchi, S.; Shimazu, K.	2021	Transl Oncol	14	2	100986	10.1016/j.tranon.2020.100986
373	No association between germline and somatic	The correlation between BRCA status and surgical cytoreduction in high-grade serous ovarian carcinoma	Kim, S. R.; Malcolmson, J.; Li, X.; Bernardini, M. Q.; Hogen, L.; May, T.	2021	Gynecol Oncol	162	3	702-706	10.1016/j.ygyno.2021.07.010
374	No association between germline and somatic	Mutations in the cysteine-rich region of the RET proto-oncogene in patients diagnosed as having sporadic medullary thyroid carcinoma	Kimura, T.; Yoshimoto, K.; Yokogoshi, Y.; Saito, S.	1995	Endocr J	42	4	517-25	10.1507/endocrj.42.517
375	No association between germline and somatic	Heterogenic loss of the wild-type BRCA allele in human breast tumorigenesis	King, T. A.; Li, W.; Brogi, E.; Yee, C. J.; Gemignani, M. L.; Olvera, N.; Levine, D. A.; Norton, L.; Robson, M. E.; Offit, K.; Borgen, P. I.; Boyd, J.	2007	Ann Surg Oncol	14	9	2510-8	10.1245/s10434-007-9372-1
376	No association between germline and somatic	High frequency of mitochondrial DNA mutations in glioblastoma multiforme identified by direct sequence comparison to blood samples	Kirches, E.; Krause, G.; Warich-Kirches, M.; Weis, S.; Schneider, T.; Meyer-Puttlitz, B.; Mawrin, C.; Dietzmann, K.	2001	Int J Cancer	93	4	534-8	10.1002/ijc.1375
377	No association between germline and somatic	Comparison between mitochondrial DNA sequences in low grade astrocytomas and corresponding blood samples	Kirches, E.; Krause, G.; Weis, S.; Mawrin, C.; Dietzmann, K.	2002	Mol Pathol	55	3	204-6	10.1136/mp.55.3.204
378	No association between germline and somatic	Single nucleotide polymorphisms of the adult intestinal stem cell marker Lgr5 in primary and metastatic colorectal cancer	Kleist, B.; Xu, L.; Kersten, C.; Seel, V.; Li, G.; Poetsch, M.	2012	Am J Transl Res	4	3	279-90
379	No association between germline and somatic	Targeted next-generation sequencing of pediatric neuro-oncology patients improves diagnosis, identifies pathogenic germline mutations, and directs targeted therapy	Kline, C. N.; Joseph, N. M.; Grenert, J. P.; van Ziffle, J.; Talevich, E.; Onodera, C.; Aboian, M.; Cha, S.; Raleigh, D. R.; Braunstein, S.; Torkildson, J.; Samuel, D.; Bloomer, M.; Campomanes, A. G. A.; Banerjee, A.; Butowski, N.; Raffel, C.; Tihan, T.; Bollen, A. W.; Phillips, J. J.; Korn, W. M.; Yeh, I.; Bastian, B. C.; Gupta, N.; Mueller, S.; Perry, A.; Nicolaides, T.; Solomon, D. A.	2017	Neuro Oncol	19	5	699-709	10.1093/neuonc/now254
380	No association between germline and somatic	Developmental genetics of neuroblastoma	Knudson, A. G., Jr.; Meadows, A. T.	1976	J Natl Cancer Inst	57	3	675-82	10.1093/jnci/57.3.675
381	No association between germline and somatic	Mutations of the Wnt antagonist AXIN2 (Conductin) result in TCF-dependent transcription in medulloblastomas	Koch, A.; Hrychyk, A.; Hartmann, W.; Waha, A.; Mikeska, T.; Waha, A.; SchÃ¼ller, U.; SÃ¶rensen, N.; Berthold, F.; Goodyer, C. G.; Wiestler, O. D.; Birchmeier, W.; Behrens, J.; Pietsch, T.	2007	Int J Cancer	121	2	284-91	10.1002/ijc.22675
382	No association between germline and somatic	Mutations and elevated transcriptional activity of conductin (AXIN2) in hepatoblastomas	Koch, A.; Weber, N.; Waha, A.; Hartmann, W.; Denkhaus, D.; Behrens, J.; Birchmeier, W.; von Schweinitz, D.; Pietsch, T.	2004	J Pathol	204	5	546-54	10.1002/path.1662
383	No association between germline and somatic	Somatic VHL gene alterations in MEN2-associated medullary thyroid carcinoma	Koch, C. A.; Brouwers, F. M.; Vortmeyer, A. O.; Tannapfel, A.; Libutti, S. K.; Zhuang, Z.; Pacak, K.; Neumann, H. P.; Paschke, R.	2006	BMC Cancer	6		131	10.1186/1471-2407-6-131
384	No association between germline and somatic	Somatic VHL gene deletion and point mutation in MEN 2A-associated pheochromocytoma	Koch, C. A.; Huang, S. C.; Zhuang, Z.; Stolle, C.; Azumi, N.; Chrousos, G. P.; Vortmeyer, A. O.; Pacak, K.	2002	Oncogene	21	3	479-82	10.1038/sj.onc.1205133
385	No association between germline and somatic	Analysis of RET protooncogene point mutations distinguishes heritable from nonheritable medullary thyroid carcinomas	Komminoth, P.; Kunz, E. K.; Matias-Guiu, X.; Hiort, O.; Christiansen, G.; Colomer, A.; Roth, J.; Heitz, P. U.	1995	Cancer	76	3	479-89	10.1002/1097-0142(19950801)76:3<479::aid-cncr2820760319>3.0.co;2-m
386	No association between germline and somatic	Molecular nature of colon tumors in hereditary nonpolyposis colon cancer, familial polyposis, and sporadic colon cancer	Konishi, M.; Kikuchi-Yanoshita, R.; Tanaka, K.; Muraoka, M.; Onda, A.; Okumura, Y.; Kishi, N.; Iwama, T.; Mori, T.; Koike, M.; Ushio, K.; Chiba, M.; Nomizu, S.; Konishi, F.; Utsunomiya, J.; Miyaki, M.	1996	Gastroenterology	111	2	307-17	10.1053/gast.1996.v111.pm8690195
387	No association between germline and somatic	Androgen receptor mutations and polymorphisms in African American prostate cancer	Koochekpour, S.; Buckles, E.; Shourideh, M.; Hu, S.; Chandra, D.; Zabaleta, J.; Attwood, K.	2014	Int J Biol Sci	10	6	643-51	10.7150/ijbs.8974
388	No association between germline and somatic	A first Japanese case of neuroendocrine prostate cancer accompanied by lung and brain metastasis with somatic and germline BRCA2 mutation	Kosaka, T.; Hongo, H.; Aimono, E.; Matsumoto, K.; Hayashida, T.; Mikami, S.; Nishihara, H.; Oya, M.	2019	Pathol Int	69	12	715-720	10.1111/pin.12860
389	No association between germline and somatic	Two BRCA1-positive epithelial ovarian tumors with metastases to the central nervous system: a case report	Koul, A.; Loman, N.; Malander, S.; Borg, A.; Ridderheim, M.	2001	Gynecol Oncol	80	3	399-402	10.1006/gyno.2000.6085
390	No association between germline and somatic	Somatic mutations in BRCA1&2 in 201 unselected ovarian carcinoma samples - single institution study	Kowalik, A.; Zalewski, K.; KopczyÅ„ski, J.; SioÅ‚ek, M.; Lech, M.; HiÅ„cza, K.; Kalisz, J.; Chrapek, M.; ZiÄ™ba, S.; FurmaÅ„czyk, J.; JedliÅ„ski, M.; ChÅ‚opek, M.; Misiek, M.; GÃ³ÅºdÅº, S.	2019	Pol J Pathol	70	2	115-126	10.5114/pjp.2019.82905
391	No association between germline and somatic	Mutational analysis of MLH1 and MSH2 in 25 prospectively-acquired RER+ endometrial cancers	Kowalski, L. D.; Mutch, D. G.; Herzog, T. J.; Rader, J. S.; Goodfellow, P. J.	1997	Genes Chromosomes Cancer	18	3	219-27	10.1002/(sici)1098-2264(199703)18:3<219::aid-gcc8>3.0.co;2-4
392	No association between germline and somatic	Cancer spectrum and frequency among children with Noonan, Costello, and cardio-facio-cutaneous syndromes	Kratz, C. P.; Franke, L.; Peters, H.; Kohlschmidt, N.; Kazmierczak, B.; Finckh, U.; Bier, A.; Eichhorn, B.; Blank, C.; Kraus, C.; Kohlhase, J.; Pauli, S.; Wildhardt, G.; Kutsche, K.; Auber, B.; Christmann, A.; Bachmann, N.; Mitter, D.; Cremer, F. W.; Mayer, K.; Daumer-Haas, C.; Nevinny-Stickel-Hinzpeter, C.; Oeffner, F.; SchlÃ¼ter, G.; Gencik, M.; Ãœberlacker, B.; Lissewski, C.; Schanze, I.; Gree…	2015	Br J Cancer	112	8	1392-7	10.1038/bjc.2015.75
393	No association between germline and somatic	Uniparental disomy at chromosome 11p15.5 followed by HRAS mutations in embryonal rhabdomyosarcoma: lessons from Costello syndrome	Kratz, C. P.; Steinemann, D.; Niemeyer, C. M.; Schlegelberger, B.; Koscielniak, E.; Kontny, U.; Zenker, M.	2007	Hum Mol Genet	16	4	374-9	10.1093/hmg/ddl458
394	No association between germline and somatic	Comprehensive screening for mutations associated with colorectal cancer in unselected cases reveals penetrant and nonpenetrant mutations	Kraus, C.; Rau, T. T.; Lux, P.; Erlenbach-WÃ¼nsch, K.; LÃ¶hr, S.; Krumbiegel, M.; Thiel, C. T.; StÃ¶hr, R.; Agaimy, A.; Croner, R. S.; StÃ¼rzl, M.; Hohenberger, W.; Hartmann, A.; Reis, A.	2015	Int J Cancer	136	6	E559-68	10.1002/ijc.29149
395	No association between germline and somatic	Genetic variation in putative regulatory loci controlling gene expression in breast cancer	Kristensen, V. N.; Edvardsen, H.; Tsalenko, A.; Nordgard, S. H.; SÃ¸rlie, T.; Sharan, R.; Vailaya, A.; Ben-Dor, A.; LÃ¸nning, P. E.; Lien, S.; Omholt, S.; SyvÃ¤nen, A. C.; Yakhini, Z.; BÃ¸rresen-Dale, A. L.	2006	Proc Natl Acad Sci U S A	103	20	7735-40	10.1073/pnas.0601893103
396	No association between germline and somatic	Pancreatic acinar cell carcinoma is associated with BRCA2 germline mutations: a case report and literature review	Kryklyva, V.; Haj Mohammad, N.; Morsink, F. H. M.; Ligtenberg, M. J. L.; Offerhaus, G. J. A.; Nagtegaal, I. D.; de Leng, W. W. J.; Brosens, L. A. A.	2019	Cancer Biol Ther	20	7	949-955	10.1080/15384047.2019.1595274
397	No association between germline and somatic	Two siblings with familial neuroblastoma with distinct clinical phenotypes harboring an ALK germline mutation	Kudo, K.; Ueno, H.; Sato, T.; Kubo, K.; Kanezaki, R.; Kobayashi, A.; Kamio, T.; Sasaki, S.; Terui, K.; Kurose, A.; Yoshida, K.; Shiozawa, Y.; Toki, T.; Ogawa, S.; Ito, E.	2018	Genes Chromosomes Cancer	57	12	665-669	10.1002/gcc.22676
398	No association between germline and somatic	Genetic and epigenetic modification of MLH1 accounts for a major share of microsatellite-unstable colorectal cancers	Kuismanen, S. A.; Holmberg, M. T.; Salovaara, R.; de la Chapelle, A.; PeltomÃ¤ki, P.	2000	Am J Pathol	156	5	1773-9	10.1016/s0002-9440(10)65048-1
399	No association between germline and somatic	Germline and somatic mutations of the APC gene in papillary thyroid carcinoma associated with familial adenomatous polyposis: Analysis of three cases and a review of the literature	Kumamoto, K.; Ishida, H.; Ohsawa, T.; Ishibashi, K.; Ushiama, M.; Yoshida, T.; Iwama, T.	2015	Oncol Lett	10	4	2239-2243	10.3892/ol.2015.3578
400	No association between germline and somatic	Elucidation of the Genomic-Epigenomic Interaction Landscape of Aggressive Prostate Cancer	Kumar Mamidi, T. K.; Wu, J.; Hicks, C.	2021	Biomed Res Int	2021		6641429	10.1155/2021/6641429
401	No association between germline and somatic	Prevalence and spectrum of pathogenic germline variants in intestinal and pancreatobiliary type of ampullary cancer	Kumari, N.; Singh, R. K.; Mishra, S. K.; L, R.; Mohindra, S.; Krishnani, N.	2021	Pathol Res Pract	217		153309	10.1016/j.prp.2020.153309
402	No association between germline and somatic	Comparison of universal screening in major lynch-associated tumors: a systematic review of literature	Kunnackal John, G.; Das Villgran, V.; Caufield-Noll, C.; Giardiello, F. M.	2022	Fam Cancer	21	1	57-67	10.1007/s10689-020-00226-w
403	No association between germline and somatic	Frequent loss of PTEN expression is linked to elevated phosphorylated Akt levels, but not associated with p27 and cyclin D1 expression, in primary epithelial ovarian carcinomas	Kurose, K.; Zhou, X. P.; Araki, T.; Cannistra, S. A.; Maher, E. R.; Eng, C.	2001	Am J Pathol	158	6	2097-106	10.1016/s0002-9440(10)64681-0
404	No association between germline and somatic	Biallelic inactivating mutations and an occult germline mutation of PTEN in primary cervical carcinomas	Kurose, K.; Zhou, X. P.; Araki, T.; Eng, C.	2000	Genes Chromosomes Cancer	29	2	166-72
405	No association between germline and somatic	MLH1/PMS2-deficient Endometrial Carcinomas in a Universally Screened Population: MLH1 Hypermethylation and Germline Mutation Status	Kurpiel, B.; Thomas, M. S.; Mubeen, M.; Ring, K. L.; Modesitt, S. C.; Moskaluk, C. A.; Mills, A. M.	2022	Int J Gynecol Pathol	41	1	2025-01-11	10.1097/pgp.0000000000000767
406	No association between germline and somatic	Preexisting TP53-Variant Clonal Hematopoiesis and Risk of Secondary Myeloid Neoplasms in Patients With High-grade Ovarian Cancer Treated With Rucaparib	Kwan, T. T.; Oza, A. M.; Tinker, A. V.; Ray-Coquard, I.; Oaknin, A.; Aghajanian, C.; Lorusso, D.; Colombo, N.; Dean, A.; Weberpals, J.; Severson, E.; Vo, L. T.; Goble, S.; Maloney, L.; Harding, T.; Kaufmann, S. H.; Ledermann, J. A.; Coleman, R. L.; McNeish, I. A.; Lin, K. K.; Swisher, E. M.	2021	JAMA Oncol	7	12	1772-1781	10.1001/jamaoncol.2021.4664
407	No association between germline and somatic	Clinical factors associated with prolonged response and survival under olaparib as maintenance therapy in BRCA mutated ovarian cancers	Labidi-Galy, S. I.; de La Motte Rouge, T.; Derbel, O.; Wolfer, A.; Kalbacher, E.; Olivier, T.; Combes, J. D.; Heimgartner-Hu, K.; Tredan, O.; Guevara, H.; Heudel, P. E.; Reverdy, T.; Bazan, F.; Heinzelmann-Schwarz, V.; Fehr, M.; de Castelbajac, V.; Vaflard, P.; Crivelli, L.; Bonadona, V.; Viassolo, V.; Buisson, A.; Golmard, L.; Rodrigues, M.; Ray-Coquard, I.	2019	Gynecol Oncol	155	2	262-269	10.1016/j.ygyno.2019.09.008
408	No association between germline and somatic	Emerging Therapeutic Implications of STK11 Mutation: Case Series	Laderian, B.; Mundi, P.; Fojo, T.; E. Bates S	2020	Oncologist	25	9	733-737	10.1634/theoncologist.2019-0846
409	No association between germline and somatic	Landscape of homologous recombination deficiencies in solid tumours: analyses of two independent genomic datasets	Lai, Z.; Brosnan, M.; Sokol, E. S.; Xie, M.; Dry, J. R.; Harrington, E. A.; Barrett, J. C.; Hodgson, D.	2022	BMC Cancer	22	1	13	10.1186/s12885-021-09082-y
410	No association between germline and somatic	BRCA1 mutations in familial ovarian cancer	Lallas, T. A.; Buekers, T. E.; Buller, R. E.	1999	Mol Genet Metab	67	4	357-63	10.1006/mgme.1999.2871
411	No association between germline and somatic	BRCA2 mutations in primary breast and ovarian cancers	Lancaster, J. M.; Wooster, R.; Mangion, J.; Phelan, C. M.; Cochran, C.; Gumbs, C.; Seal, S.; Barfoot, R.; Collins, N.; Bignell, G.; Patel, S.; Hamoudi, R.; Larsson, C.; Wiseman, R. W.; Berchuck, A.; Iglehart, J. D.; Marks, J. R.; Ashworth, A.; Stratton, M. R.; Futreal, P. A.	1996	Nat Genet	13	2	238-40	10.1038/ng0696-238
412	No association between germline and somatic	Somatic mutations of the RET proto-oncogene are not required for tumor development in multiple endocrine neoplasia type 2 (MEN 2) gene carriers	Landsvater, R. M.; de Wit, M. J.; Zewald, R. A.; Hofstra, R. M.; Buys, C. H.; Ploos van Amstel, H. K.; HÃ¶ppener, J. W.; Lips, C. J.	1996	Cancer Res	56	21	4853-5
413	No association between germline and somatic	Exome and deep sequencing of clinically aggressive neuroblastoma reveal somatic mutations that affect key pathways involved in cancer progression	Lasorsa, V. A.; Formicola, D.; Pignataro, P.; Cimmino, F.; Calabrese, F. M.; Mora, J.; Esposito, M. R.; Pantile, M.; Zanon, C.; De Mariano, M.; Longo, L.; Hogarty, M. D.; de Torres, C.; Tonini, G. P.; Iolascon, A.; Capasso, M.	2016	Oncotarget	7	16	21840-52	10.18632/oncotarget.8187
414	No association between germline and somatic	Whole-genome and transcriptome analysis of advanced adrenocortical cancer highlights multiple alterations affecting epigenome and DNA repair pathways	Lavoie, J. M.; Csizmok, V.; Williamson, L. M.; Culibrk, L.; Wang, G.; Marra, M. A.; Laskin, J.; Jones, S. J. M.; Renouf, D. J.; Kollmannsberger, C. K.	2022	Cold Spring Harb Mol Case Stud	8	3		10.1101/mcs.a006148
415	No association between germline and somatic	Using Exome Sequencing to Improve Prediction of FOLFIRINOX First Efficacy for Pancreatic Adenocarcinoma	Lecuelle, J.; Aarnink, A.; Tharin, Z.; Truntzer, C.; Ghiringhelli, F.	2021	Cancers (Basel)	13	8		10.3390/cancers13081851
416	No association between germline and somatic	Germline BLM mutations and metastatic prostate cancer	Ledet, E. M.; Antonarakis, E. S.; Isaacs, W. B.; Lotan, T. L.; Pritchard, C.; Sartor, A. O.	2020	Prostate	80	2	235-237	10.1002/pros.23924
417	No association between germline and somatic	Biallelic inactivation of fumarate hydratase (FH) occurs in nonsyndromic uterine leiomyomas but is rare in other tumors	Lehtonen, R.; Kiuru, M.; Vanharanta, S.; SjÃ¶berg, J.; Aaltonen, L. M.; AittomÃ¤ki, K.; Arola, J.; Butzow, R.; Eng, C.; Husgafvel-Pursiainen, K.; Isola, J.; JÃ¤rvinen, H.; Koivisto, P.; Mecklin, J. P.; PeltomÃ¤ki, P.; Salovaara, R.; Wasenius, V. M.; Karhu, A.; Launonen, V.; Nupponen, N. N.; Aaltonen, L. A.	2004	Am J Pathol	164	1	17-22	10.1016/s0002-9440(10)63091-x
418	No association between germline and somatic	Prevalence of Tissue BRCA Gene Mutation in Ovarian, Fallopian Tube, and Primary Peritoneal Cancers: A Multi-Institutional Study	Lertkhachonsuk, A. A.; Suprasert, P.; Manchana, T.; Kittisiam, T.; Kantathavorn, N.; Chansoon, T.; Khunamornpong, S.; Pohthipornthawat, N.; Tangjitgamol, S.; Luasiripanthu, T.; Teerapakpinyo, C.; Shuangshot, S.; Iemwimangsa, N.; Chantratita, W.	2020	Asian Pac J Cancer Prev	21	8	2381-2388	10.31557/apjcp.2020.21.8.2381
419	No association between germline and somatic	Mismatch Repair Deficiency in Ovarian Carcinoma: Frequency, Causes, and Consequences	Leskela, S.; Romero, I.; Cristobal, E.; PÃ©rez-Mies, B.; Rosa-Rosa, J. M.; Gutierrez-Pecharroman, A.; Caniego-Casas, T.; SantÃ³n, A.; Ojeda, B.; LÃ³pez-Reig, R.; Palacios-Berraquero, M. L.; GarcÃ­a, Ã; Ibarra, J.; Hakim, S.; Guarch, R.; LÃ³pez-Guerrero, J. A.; Poveda, A.; Palacios, J.	2020	Am J Surg Pathol	44	5	649-656	10.1097/pas.0000000000001432
420	No association between germline and somatic	Risk of endometrial carcinoma associated with BRCA mutation	Levine, D. A.; Lin, O.; Barakat, R. R.; Robson, M. E.; McDermott, D.; Cohen, L.; Satagopan, J.; Offit, K.; Boyd, J.	2001	Gynecol Oncol	80	3	395-8	10.1006/gyno.2000.6082
421	No association between germline and somatic	Novel germ line DDX41 mutations define families with a lower age of MDS/AML onset and lymphoid malignancies	Lewinsohn, M.; Brown, A. L.; Weinel, L. M.; Phung, C.; Rafidi, G.; Lee, M. K.; Schreiber, A. W.; Feng, J.; Babic, M.; Chong, C. E.; Lee, Y.; Yong, A.; Suthers, G. K.; Poplawski, N.; Altree, M.; Phillips, K.; Jaensch, L.; Fine, M.; D'Andrea, R. J.; Lewis, I. D.; Medeiros, B. C.; Pollyea, D. A.; King, M. C.; Walsh, T.; Keel, S.; Shimamura, A.; Godley, L. A.; Hahn, C. N.; Churpek, J. E.; Scott, H. S.	2016	Blood	127	8	1017-23	10.1182/blood-2015-10-676098
422	No association between germline and somatic	Analysis of BRCA1/2 mutation spectrum and prevalence in unselected Chinese breast cancer patients by next-generation sequencing	Li, G.; Guo, X.; Tang, L.; Chen, M.; Luo, X.; Peng, L.; Xu, X.; Wang, S.; Xiao, Z.; Yi, W.; Dai, L.; Wang, J.	2017	J Cancer Res Clin Oncol	143	10	2011-2024	10.1007/s00432-017-2465-8
423	No association between germline and somatic	FGFR genes mutation is an independent prognostic factor and associated with lymph node metastasis in squamous non-small cell lung cancer	Li, J. J.; Yan, S.; Pan, Y.; Liu, Z.; Liu, Y.; Deng, Q.; Tan, Q.; Woodward, E. R.; Wu, N.	2018	Cancer Biol Ther	19	12	1108-1116	10.1080/15384047.2018.1480294
424	No association between germline and somatic	Combined Tumor Sequencing and Case-Control Analyses of RAD51C in Breast Cancer	Li, N.; McInerny, S.; Zethoven, M.; Cheasley, D.; Lim, B. W. X.; Rowley, S. M.; Devereux, L.; Grewal, N.; Ahmadloo, S.; Byrne, D.; Lee, J. E. A.; Li, J.; Fox, S. B.; John, T.; Antill, Y.; Gorringe, K. L.; James, P. A.; Campbell, I. G.	2019	J Natl Cancer Inst	111	12	1332-1338	10.1093/jnci/djz045
425	No association between germline and somatic	Cancer gene profiling in non-small cell lung cancers reveals activating mutations in JAK2 and JAK3 with therapeutic implications	Li, S. D.; Ma, M.; Li, H.; Waluszko, A.; Sidorenko, T.; Schadt, E. E.; Zhang, D. Y.; Chen, R.; Ye, F.	2017	Genome Med	9	1	89	10.1186/s13073-017-0478-1
426	No association between germline and somatic	TP53 mutations as potential prognostic markers for specific cancers: analysis of data from The Cancer Genome Atlas and the International Agency for Research on Cancer TP53 Database	Li, V. D.; Li, K. H.; Li, J. T.	2019	J Cancer Res Clin Oncol	145	3	625-636	10.1007/s00432-018-2817-z
427	No association between germline and somatic	Allelic loss on chromosome 13q14 and mutation in deleted in cancer 1 gene in esophageal squamous cell carcinoma	Li, W. J.; Hu, N.; Su, H.; Wang, C.; Goldstein, A. M.; Wang, Y.; Emmert-Buck, M. R.; Roth, M. J.; Guo, W. J.; Taylor, P. R.	2003	Oncogene	22	2	314-8	10.1038/sj.onc.1206098
428	No association between germline and somatic	Whole-genome sequencing of phenotypically distinct inflammatory breast cancers reveals similar genomic alterations to non-inflammatory breast cancers	Li, X.; Kumar, S.; Harmanci, A.; Li, S.; Kitchen, R. R.; Zhang, Y.; Wali, V. B.; Reddy, S. M.; Woodward, W. A.; Reuben, J. M.; Rozowsky, J.; Hatzis, C.; Ueno, N. T.; Krishnamurthy, S.; Pusztai, L.; Gerstein, M.	2021	Genome Med	13	1	70	10.1186/s13073-021-00879-x
429	No association between germline and somatic	Clustering of variations and haplotype analysis in the highly variable region of exon 11 of BRCA1 in Chinese women with sporadic breast cancer	Li, Y.; Zhang, S.; Xiao, C.; Su, Z.; Zhao, Y.; Chen, W.; Zhang, G.	2002	Hum Mutat	20	5	404-5	10.1002/humu.9071
430	No association between germline and somatic	Integrated genomic analyses reveal frequent TERT aberrations in acral melanoma	Liang, W. S.; Hendricks, W.; Kiefer, J.; Schmidt, J.; Sekar, S.; Carpten, J.; Craig, D. W.; Adkins, J.; Cuyugan, L.; Manojlovic, Z.; Halperin, R. F.; Helland, A.; Nasser, S.; Legendre, C.; Hurley, L. H.; Sivaprakasam, K.; Johnson, D. B.; Crandall, H.; Busam, K. J.; Zismann, V.; Deluca, V.; Lee, J.; Sekulic, A.; Ariyan, C. E.; Sosman, J.; Trent, J.	2017	Genome Res	27	4	524-532	10.1101/gr.213348.116
431	No association between germline and somatic	Phosphodiesterase 11A (PDE11A) and genetic predisposition to adrenocortical tumors	LibÃ©, R.; Fratticci, A.; Coste, J.; Tissier, F.; Horvath, A.; Ragazzon, B.; Rene-Corail, F.; Groussin, L.; Bertagna, X.; Raffin-Sanson, M. L.; Stratakis, C. A.; Bertherat, J.	2008	Clin Cancer Res	14	12	4016-24	10.1158/1078-0432.Ccr-08-0106
432	No association between germline and somatic	Comprehensive genomic profiling reveals inactivating SMARCA4 mutations and low tumor mutational burden in small cell carcinoma of the ovary, hypercalcemic-type	Lin, D. I.; Chudnovsky, Y.; Duggan, B.; Zajchowski, D.; Greenbowe, J.; Ross, J. S.; Gay, L. M.; Ali, S. M.; Elvin, J. A.	2017	Gynecol Oncol	147	3	626-633	10.1016/j.ygyno.2017.09.031
433	No association between germline and somatic	Germline susceptibility variants impact clinical outcome and therapeutic strategies for stage III colorectal cancer	Lin, P. C.; Yeh, Y. M.; Wu, P. Y.; Hsu, K. F.; Chang, J. Y.; Shen, M. R.	2019	Sci Rep	9	1	3931	10.1038/s41598-019-40571-0
434	No association between germline and somatic	Extended RET gene analysis in patients with apparently sporadic medullary thyroid cancer: clinical benefits and cost	Lindsey, S. C.; Kunii, I. S.; Germano-Neto, F.; Sittoni, M. Y.; Camacho, C. P.; Valente, F. O.; Yang, J. H.; Signorini, P. S.; Delcelo, R.; Cerutti, J. M.; Maciel, R. M.; Dias-da-Silva, M. R.	2012	Horm Cancer	3	4	181-6	10.1007/s12672-012-0109-7
435	No association between germline and somatic	PALLD mutation in a European family conveys a stromal predisposition for familial pancreatic cancer	Liotta, L.; Lange, S.; Maurer, H. C.; Olive, K. P.; Braren, R.; Pfarr, N.; Burger, S.; Muckenhuber, A.; Jesinghaus, M.; Steiger, K.; Weichert, W.; Friess, H.; Schmid, R.; AlgÃ¼l, H.; Jost, P. J.; Ramser, J.; Fischer, C.; Quante, A. S.; Reichert, M.; Quante, M.	2021	JCI Insight	6	8		10.1172/jci.insight.141532
436	No association between germline and somatic	The impact of genetic aberrations on response to radium-223 treatment for castration-resistant prostate cancer with bone metastases	Liu, A. J.; Kosiorek, H. E.; Ueberroth, B. E.; Jaeger, E.; Ledet, E.; Kendi, A. T.; Tzou, K.; Quevedo, F.; Choo, R.; Moore, C. N.; Ho, T. H.; Singh, P.; Keole, S. R.; Wong, W. W.; Sartor, O.; Bryce, A. H.	2022	Prostate				10.1002/pros.24375
437	No association between germline and somatic	Mutation spectrums of TSC1 and TSC2 in Chinese women with lymphangioleiomyomatosis (LAM)	Liu, J.; Zhao, W.; Ou, X.; Zhao, Z.; Hu, C.; Sun, M.; Liu, F.; Deng, J.; Gu, W.; An, J.; Zhang, Q.; Zhang, X.; Xie, J.; Li, S.; Chen, R.; Yu, S.; Zhong, N.	2019	PLoS One	14	12	e0226400	10.1371/journal.pone.0226400
438	No association between germline and somatic	The contribution of hereditary cancer-related germline mutations to lung cancer susceptibility	Liu, M.; Liu, X.; Suo, P.; Gong, Y.; Qu, B.; Peng, X.; Xiao, W.; Li, Y.; Chen, Y.; Zeng, Z.; Lu, Y.; Huang, T.; Zhao, Y.; Liu, M.; Li, L.; Chen, Y.; Zhou, Y.; Liu, G.; Yao, J.; Chen, S.; Song, L.	2020	Transl Lung Cancer Res	9	3	646-658	10.21037/tlcr-19-403
439	No association between germline and somatic	HIF2A germline-mutation-induced polycythemia in a patient with VHL-associated renal-cell carcinoma	Liu, Q.; Tong, D.; Liu, G.; Yi, Y.; Zhang, D.; Zhang, J.; Zhang, Y.; Huang, Z.; Li, Y.; Chen, R.; Guan, Y.; Yi, X.; Jiang, J.	2017	Cancer Biol Ther	18	12	944-947	10.1080/15384047.2017.1394553
440	No association between germline and somatic	Mutation analysis of PTEN/MMAC1 in acute myeloid leukemia	Liu, T. C.; Lin, P. M.; Chang, J. G.; Lee, J. P.; Chen, T. P.; Lin, S. F.	2000	Am J Hematol	63	4	170-5	10.1002/(sici)1096-8652(200004)63:4<170::aid-ajh2>3.0.co;2-0
441	No association between germline and somatic	An isolated childhood myeloid sarcoma with germline MSH6 mutation-a case report	Liu, Y.; GuLiBaHa, M.; Yue, Y. B.; Li, M. W.; Cao, S. B.; Yan, M.	2021	Transl Pediatr	10	8	2136-2143	10.21037/tp-21-326
442	No association between germline and somatic	Somatic mutational profiles and germline polygenic risk scores in human cancer	Liu, Y.; Gusev, A.; Heng, Y. J.; Alexandrov, L. B.; Kraft, P.	2022	Genome Med	14	1	14	10.1186/s13073-022-01016-y
443	No association between germline and somatic	BRCA Mutations, Homologous DNA Repair Deficiency, Tumor Mutational Burden, and Response to Immune Checkpoint Inhibition in Recurrent Ovarian Cancer	Liu, Y. L.; Selenica, P.; Zhou, Q.; Iasonos, A.; Callahan, M.; Feit, N. Z.; Boland, J.; Vazquez-Garcia, I.; Mandelker, D.; Zehir, A.; Burger, R. A.; Powell, D. J., Jr.; Friedman, C.; Cadoo, K.; Grisham, R.; Konner, J. A.; O'Cearbhaill, R. E.; Aghajanian, C.; Reis-Filho, J. S.; Weigelt, B.; Zamarin, D.	2020	JCO Precis Oncol	4			10.1200/po.20.00069
444	No association between germline and somatic	Germline and somatic cancer-associated mutations in the ATP-binding motifs of PTEN influence its subcellular localization and tumor suppressive function	Lobo, G. P.; Waite, K. A.; Planchon, S. M.; Romigh, T.; Nassif, N. T.; Eng, C.	2009	Hum Mol Genet	18	15	2851-62	10.1093/hmg/ddp220
445	No association between germline and somatic	Constitutional RB1-gene mutations in patients with isolated unilateral retinoblastoma	Lohmann, D. R.; Gerick, M.; Brandt, B.; OelschlÃ¤ger, U.; Lorenz, B.; Passarge, E.; Horsthemke, B.	1997	Am J Hum Genet	61	2	282-94	10.1086/514845
446	No association between germline and somatic	IKZF1 Gene in Childhood B-cell Precursor Acute Lymphoblastic Leukemia: Interplay between Genetic Susceptibility and Somatic Abnormalities	Lopes, B. A.; Barbosa, T. C.; Souza, B. K. S.; Poubel, C. P.; Pombo-de-Oliveira, M. S.; Emerenciano, M.	2017	Cancer Prev Res (Phila)	10	12	738-744	10.1158/1940-6207.Capr-17-0121
447	No association between germline and somatic	E2F1 somatic mutation within miRNA target site impairs gene regulation in colorectal cancer	Lopes-Ramos, C. M.; Barros, B. P.; Koyama, F. C.; Carpinetti, P. A.; Pezuk, J.; Doimo, N. T. S.; Habr-Gama, A.; Perez, R. O.; Parmigiani, R. B.	2017	PLoS One	12	7	e0181153	10.1371/journal.pone.0181153
448	No association between germline and somatic	Genomic and transcriptomic changes complement each other in the pathogenesis of sporadic Burkitt lymphoma	LÃ³pez, C.; Kleinheinz, K.; Aukema, S. M.; Rohde, M.; Bernhart, S. H.; HÃ¼bschmann, D.; Wagener, R.; Toprak, U. H.; Raimondi, F.; Kreuz, M.; Waszak, S. M.; Huang, Z.; Sieverling, L.; Paramasivam, N.; Seufert, J.; Sungalee, S.; Russell, R. B.; Bausinger, J.; Kretzmer, H.; Ammerpohl, O.; Bergmann, A. K.; Binder, H.; Borkhardt, A.; Brors, B.; Claviez, A.; Doose, G.; Feuerbach, L.; Haake, A.; Hansman…	2019	Nat Commun	10	1	1459	10.1038/s41467-019-08578-3
449	No association between germline and somatic	A novel EPAS1/HIF2A germline mutation in a congenital polycythemia with paraganglioma	Lorenzo, F. R.; Yang, C.; Ng Tang Fui, M.; Vankayalapati, H.; Zhuang, Z.; Huynh, T.; Grossmann, M.; Pacak, K.; Prchal, J. T.	2013	J Mol Med (Berl)	91	4	507-12	10.1007/s00109-012-0967-z
450	No association between germline and somatic	DNA damage repair alterations are frequent in prostatic adenocarcinomas with focal pleomorphic giant-cell features	Lotan, T. L.; Kaur, H. B.; Alharbi, A. M.; Pritchard, C. C.; Epstein, J. I.	2019	Histopathology	74	6	836-843	10.1111/his.13806
451	No association between germline and somatic	Homologous recombination deficiency (HRD) score in germline BRCA2- versus ATM-altered prostate cancer	Lotan, T. L.; Kaur, H. B.; Salles, D. C.; Murali, S.; Schaeffer, E. M.; Lanchbury, J. S.; Isaacs, W. B.; Brown, R.; Richardson, A. L.; Cussenot, O.; Cancel-Tassin, G.; Timms, K. M.; Antonarakis, E. S.	2021	Mod Pathol	34	6	1185-1193	10.1038/s41379-020-00731-4
452	No association between germline and somatic	Somatic molecular subtyping of prostate tumors from HOXB13 G84E carriers	Lotan, T. L.; Torres, A.; Zhang, M.; Tosoian, J. J.; Guedes, L. B.; Fedor, H.; Hicks, J.; Ewing, C. M.; Isaacs, S. D.; Johng, D.; De Marzo, A. M.; Isaacs, W. B.	2017	Oncotarget	8	14	22772-22782	10.18632/oncotarget.15196
453	No association between germline and somatic	Germline Mutation of T790M and Dual/Multiple EGFR Mutations in Patients With Lung Adenocarcinoma	Lou, Y.; Pecot, C. V.; Tran, H. T.; DeVito, V. J.; Tang, X. M.; Heymach, J. V.; Luthra, R.; Wistuba,, II; Zuo, Z.; Tsao, A. S.	2016	Clin Lung Cancer	17	2	e5-11	10.1016/j.cllc.2015.11.003
454	No association between germline and somatic	Prospective Evaluation of Germline Alterations in Patients With Exocrine Pancreatic Neoplasms	Lowery, M. A.; Wong, W.; Jordan, E. J.; Lee, J. W.; Kemel, Y.; Vijai, J.; Mandelker, D.; Zehir, A.; Capanu, M.; Salo-Mullen, E.; Arnold, A. G.; Yu, K. H.; Varghese, A. M.; Kelsen, D. P.; Brenner, R.; Kaufmann, E.; Ravichandran, V.; Mukherjee, S.; Berger, M. F.; Hyman, D. M.; Klimstra, D. S.; Abou-Alfa, G. K.; Tjan, C.; Covington, C.; Maynard, H.; Allen, P. J.; Askan, G.; Leach, S. D.; Iacobuzio-D…	2018	J Natl Cancer Inst	110	10	1067-1074	10.1093/jnci/djy024
455	No association between germline and somatic	Patterns and functional implications of rare germline variants across 12 cancer types	Lu, C.; Xie, M.; Wendl, M. C.; Wang, J.; McLellan, M. D.; Leiserson, M. D.; Huang, K. L.; Wyczalkowski, M. A.; Jayasinghe, R.; Banerjee, T.; Ning, J.; Tripathi, P.; Zhang, Q.; Niu, B.; Ye, K.; Schmidt, H. K.; Fulton, R. S.; McMichael, J. F.; Batra, P.; Kandoth, C.; Bharadwaj, M.; Koboldt, D. C.; Miller, C. A.; Kanchi, K. L.; Eldred, J. M.; Larson, D. E.; Welch, J. S.; You, M.; Ozenberger, B. A.; …	2015	Nat Commun	6		10086	10.1038/ncomms10086
456	No association between germline and somatic	Loss or somatic mutations of hMSH2 occur in hereditary nonpolyposis colorectal cancers with hMSH2 germline mutations	Lu, S. L.; Akiyama, Y.; Nagasaki, H.; Nomizu, T.; Ikeda, E.; Baba, S.; Ushio, K.; Iwama, T.; Maruyama, K.; Yuasa, Y.	1996	Jpn J Cancer Res	87	3	279-87	10.1111/j.1349-7006.1996.tb00218.x
457	No association between germline and somatic	Mutations of the transforming growth factor-beta type II receptor gene and genomic instability in hereditary nonpolyposis colorectal cancer	Lu, S. L.; Akiyama, Y.; Nagasaki, H.; Saitoh, K.; Yuasa, Y.	1995	Biochem Biophys Res Commun	216	2	452-7	10.1006/bbrc.1995.2644
458	No association between germline and somatic	Hereditary and sporadic papillary renal carcinomas with c-met mutations share a distinct morphological phenotype	Lubensky, I. A.; Schmidt, L.; Zhuang, Z.; Weirich, G.; Pack, S.; Zambrano, N.; Walther, M. M.; Choyke, P.; Linehan, W. M.; Zbar, B.	1999	Am J Pathol	155	2	517-26	10.1016/s0002-9440(10)65147-4
459	No association between germline and somatic	Characterizations of Gene Alterations in Melanoma Patients from Chinese Population	Luo, Y.; Zhang, Z.; Liu, J.; Li, L.; Xu, X.; Yao, X.; Dai, Z.; Wang, X.; Yang, S.; Wu, H.; Bu, J.; Wu, Y.; Xiang, T.; Li, X.	2020	Biomed Res Int	2020		6096814	10.1155/2020/6096814
460	No association between germline and somatic	Inherited mutations in PTEN that are associated with breast cancer, cowden disease, and juvenile polyposis	Lynch, E. D.; Ostermeyer, E. A.; Lee, M. K.; Arena, J. F.; Ji, H.; Dann, J.; Swisshelm, K.; Suchard, D.; MacLeod, P. M.; Kvinnsland, S.; Gjertsen, B. T.; Heimdal, K.; Lubs, H.; MÃ¸ller, P.; King, M. C.	1997	Am J Hum Genet	61	6	1254-60	10.1086/301639
461	No association between germline and somatic	Integrated molecular profiling of young and elderly patients with triple-negative breast cancer indicates different biological bases and clinical management strategies	Ma, D.; Jiang, Y. Z.; Xiao, Y.; Xie, M. D.; Zhao, S.; Jin, X.; Xu, X. E.; Shao, Z. M.	2020	Cancer	126	14	3209-3218	10.1002/cncr.32922
462	No association between germline and somatic	GATA3 germline variant is associated with CRLF2 expression and predicts outcome in pediatric B-cell precursor acute lymphoblastic leukemia	Madzio, J.; Pastorczak, A.; Sedek, L.; Braun, M.; Taha, J.; Wypyszczak, K.; Trelinska, J.; Lejman, M.; Muszynska-Roslan, K.; Tomasik, B.; Derwich, K.; Koltan, A.; Kazanowska, B.; Irga-Jaworska, N.; Badowska, W.; Matysiak, M.; Kowalczyk, J.; Styczynski, J.; Fendler, W.; Szczepanski, T.; Mlynarski, W.	2019	Genes Chromosomes Cancer	58	9	619-626	10.1002/gcc.22748
463	No association between germline and somatic	Point mutations of ornithine decarboxylase gene are an infrequent event in colorectal cancer but a missense mutation was found in a replication error positive patient with hMSH2 germline mutation	Maekawa, M.; Sugano, K.; Kashiwabara, H.; Ushiama, M.; Fujita, S.; Ohkura, H.; Kakizoe, T.	1998	Jpn J Clin Oncol	28	6	383-7	10.1093/jjco/28.6.383
464	No association between germline and somatic	Solid Pseudopapillary Neoplasm of the Pancreas and Abdominal Desmoid Tumor in a Patient Carrying Two Different BRCA2 Germline Mutations: New Horizons from Tumor Molecular Profiling	Mafficini, A.; Lawlor, R. T.; Ghimenton, C.; Antonello, D.; CantÃ¹, C.; Paolino, G.; Nottegar, A.; Piredda, M. L.; Salvia, R.; Milella, M.; Dei Tos, A. P.; Fassan, M.; Scarpa, A.; Luchini, C.	2021	Genes (Basel)	12	4		10.3390/genes12040481
465	No association between germline and somatic	Ceralasertib-Mediated ATR Inhibition Combined With Olaparib in Advanced Cancers Harboring DNA Damage Response and Repair Alterations (Olaparib Combinations)	Mahdi, H.; Hafez, N.; Doroshow, D.; Sohal, D.; Keedy, V.; Do, K. T.; LoRusso, P.; JÃ¼rgensmeier, J.; Avedissian, M.; Sklar, J.; Glover, C.; Felicetti, B.; Dean, E.; Mortimer, P.; Shapiro, G. I.; Eder, J. P.	2021	JCO Precis Oncol	5			10.1200/po.20.00439
466	No association between germline and somatic	Identification of Two Novel HOXB13 Germline Mutations in Portuguese Prostate Cancer Patients	Maia, S.; Cardoso, M.; Pinto, P.; Pinheiro, M.; Santos, C.; Peixoto, A.; Bento, M. J.; Oliveira, J.; Henrique, R.; JerÃ³nimo, C.; Teixeira, M. R.	2015	PLoS One	10	7	e0132728	10.1371/journal.pone.0132728
467	No association between germline and somatic	An Î±-E-catenin (CTNNA1) mutation in hereditary diffuse gastric cancer	Majewski, I. J.; Kluijt, I.; Cats, A.; Scerri, T. S.; de Jong, D.; Kluin, R. J.; Hansford, S.; Hogervorst, F. B.; Bosma, A. J.; Hofland, I.; Winter, M.; Huntsman, D.; Jonkers, J.; Bahlo, M.; Bernards, R.	2013	J Pathol	229	4	621-9	10.1002/path.4152
468	No association between germline and somatic	Biallelic inactivation of the SDHC gene in renal carcinoma associated with paraganglioma syndrome type 3	Malinoc, A.; Sullivan, M.; Wiech, T.; Schmid, K. W.; Jilg, C.; Straeter, J.; Deger, S.; Hoffmann, M. M.; Bosse, A.; Rasp, G.; Eng, C.; Neumann, H. P.	2012	Endocr Relat Cancer	19	3	283-90	10.1530/erc-11-0324
469	No association between germline and somatic	Two distinct classes of thymic tumors in patients with MEN1 show LOH at the MEN1 locus	Mandl, A.; Welch, J. M.; Kapoor, G.; Parekh, V. I.; Schrump, D. S.; Ripley, R. T.; Walter, M. F.; Del Rivero, J.; Jha, S.; Simonds, W. F.; Jensen, R. T.; Weinstein, L. S.; Blau, J. E.; Agarwal, S. K.	2021	Endocr Relat Cancer	28	11	L15-l19	10.1530/erc-21-0226
470	No association between germline and somatic	Evidence for a hereditary neuroblastoma predisposition locus at chromosome 16p12-13	Maris, J. M.; Weiss, M. J.; Mosse, Y.; Hii, G.; Guo, C.; White, P. S.; Hogarty, M. D.; Mirensky, T.; Brodeur, G. M.; Rebbeck, T. R.; Urbanek, M.; Shusterman, S.	2002	Cancer Res	62	22	6651-8
471	No association between germline and somatic	Extreme responses to immune checkpoint blockade following bipolar androgen therapy and enzalutamide in patients with metastatic castration resistant prostate cancer	Markowski, M. C.; Shenderov, E.; Eisenberger, M. A.; Kachhap, S.; Pardoll, D. M.; Denmeade, S. R.; Antonarakis, E. S.	2020	Prostate	80	5	407-411	10.1002/pros.23955
472	No association between germline and somatic	Mutation spectrum and genotype-phenotype analyses in Cowden disease and Bannayan-Zonana syndrome, two hamartoma syndromes with germline PTEN mutation	Marsh, D. J.; Coulon, V.; Lunetta, K. L.; Rocca-Serra, P.; Dahia, P. L.; Zheng, Z.; Liaw, D.; Caron, S.; DubouÃ©, B.; Lin, A. Y.; Richardson, A. L.; Bonnetblanc, J. M.; Bressieux, J. M.; Cabarrot-Moreau, A.; Chompret, A.; Demange, L.; Eeles, R. A.; Yahanda, A. M.; Fearon, E. R.; Fricker, J. P.; Gorlin, R. J.; Hodgson, S. V.; Huson, S.; Lacombe, D.; Eng, C.; et al.,	1998	Hum Mol Genet	7	3	507-15	10.1093/hmg/7.3.507
473	No association between germline and somatic	Differential Response to Olaparib Treatment Among Men with Metastatic Castration-resistant Prostate Cancer Harboring BRCA1 or BRCA2 Versus ATM Mutations	Marshall, C. H.; Sokolova, A. O.; McNatty, A. L.; Cheng, H. H.; Eisenberger, M. A.; Bryce, A. H.; Schweizer, M. T.; Antonarakis, E. S.	2019	Eur Urol	76	4	452-458	10.1016/j.eururo.2019.02.002
474	No association between germline and somatic	Nevoid Basal Cell Carcinoma Syndrome: PTCH1 Mutation Profile and Expression of Genes Involved in the Hedgehog Pathway in Argentinian Patients	Martinez, M. F.; Romano, M. V.; Martinez, A. P.; GonzÃ¡lez, A.; Muchnik, C.; Stengel, F. M.; Mazzuoccolo, L. D.; Azurmendi, P. J.	2019	Cells	8	2		10.3390/cells8020144
475	No association between germline and somatic	Germline and somatic mutation of the gene for multiple endocrine neoplasia type 1 (MEN1)	Marx, S. J.; Agarwal, S. K.; Kester, M. B.; Heppner, C.; Kim, Y. S.; Emmert-Buck, M. R.; Debelenko, L. V.; Lubensky, I. A.; Zhuang, Z.; Guru, S. C.; Manickam, P.; Olufemi, S. E.; Skarulis, M. C.; Doppman, J. L.; Alexander, R. H.; Liotta, L. A.; Collins, F. S.; Chandrasekharappa, S. C.; Spiegel, A. M.; Burns, A. L.	1998	J Intern Med	243	6	447-53	10.1046/j.1365-2796.1998.00348.x
476	No association between germline and somatic	Comprehensive genomic profiling of Brazilian non-small cell lung cancer patients (GBOT 0118/LACOG0418)	Mascarenhas, E.; Gelatti, A. C.; AraÃºjo, L. H.; Baldotto, C.; Mathias, C.; Zukin, M.; Werutsky, G.; Pacheco, P.; Gomes, R.; de Castro, G., Jr.; Cordeiro de Lima, V. C.	2021	Thorac Cancer	12	5	580-587	10.1111/1759-7714.13777
477	No association between germline and somatic	Novel Somatic RET Mutation Questioning the Causality of the RET I852M Germline Sequence Variant in Multiple Endocrine Neoplasia 2A	Mathiesen, J. S.; van Overeem Hansen, T.; Rasmussen Ã…, K.; HjortshÃ¸j, T. D.; Kiss, K.; Larsen, S. R.; Krogh, L. N.; Frederiksen, A. L.; Hermann, A. P.; Godballe, C.	2017	Thyroid	27	8	1103-1104	10.1089/thy.2017.0131
478	No association between germline and somatic	Somatic and germline mutation in GRIM-19, a dual function gene involved in mitochondrial metabolism and cell death, is linked to mitochondrion-rich (Hurthle cell) tumours of the thyroid	MÃ¡ximo, V.; Botelho, T.; Capela, J.; Soares, P.; Lima, J.; Taveira, A.; Amaro, T.; Barbosa, A. P.; Preto, A.; Harach, H. R.; Williams, D.; Sobrinho-SimÃµes, M.	2005	Br J Cancer	92	10	1892-8	10.1038/sj.bjc.6602547
479	No association between germline and somatic	BRCA1 and BRCA2 mutations correlate with TP53 abnormalities and presence of immune cell infiltrates in ovarian high-grade serous carcinoma	McAlpine, J. N.; Porter, H.; KÃ¶bel, M.; Nelson, B. H.; Prentice, L. M.; Kalloger, S. E.; Senz, J.; Milne, K.; Ding, J.; Shah, S. P.; Huntsman, D. G.; Gilks, C. B.	2012	Mod Pathol	25	5	740-50	10.1038/modpathol.2011.211
480	No association between germline and somatic	Tandem duplication of chromosomal segments is common in ovarian and breast cancer genomes	McBride, D. J.; Etemadmoghadam, D.; Cooke, S. L.; Alsop, K.; George, J.; Butler, A.; Cho, J.; Galappaththige, D.; Greenman, C.; Howarth, K. D.; Lau, K. W.; Ng, C. K.; Raine, K.; Teague, J.; Wedge, D. C.; Cancer Study Group, A. O.; Caubit, X.; Stratton, M. R.; Brenton, J. D.; Campbell, P. J.; Futreal, P. A.; Bowtell, D. D.	2012	J Pathol	227	4	446-55	10.1002/path.4042
481	No association between germline and somatic	The role of genomic profiling in adolescents and young adults (AYAs) with advanced cancer participating in phase I clinical trials	McVeigh, T. P.; Sundar, R.; Diamantis, N.; Kaye, S. B.; Banerji, U.; Lopez, J. S.; de Bono, J.; van der Graaf, W. T. A.; George, A. J.	2018	Eur J Cancer	95		20-29	10.1016/j.ejca.2018.02.028
482	No association between germline and somatic	Using germline genotype in cancer pharmacogenetic studies	McWhinney, S. R.; McLeod, H. L.	2009	Pharmacogenomics	10	3	489-93	10.2217/14622416.10.3.489
483	No association between germline and somatic	Somatic Bi-allelic Loss of TSC Genes in Eosinophilic Solid and Cystic Renal Cell Carcinoma	Mehra, R.; Vats, P.; Cao, X.; Su, F.; Lee, N. D.; Lonigro, R.; Premkumar, K.; Trpkov, K.; McKenney, J. K.; Dhanasekaran, S. M.; Chinnaiyan, A. M.	2018	Eur Urol	74	4	483-486	10.1016/j.eururo.2018.06.007
484	No association between germline and somatic	The novel KIT exon 11 germline mutation K558N is associated with gastrointestinal stromal tumor, mastocytosis, and seminoma development	Meir, M.; Maurus, K.; Kuper, J.; Hankir, M.; Wardelmann, E.; Rosenwald, A.; Germer, C. T.; Wiegering, A.	2021	Genes Chromosomes Cancer	60	12	827-832	10.1002/gcc.22988
485	No association between germline and somatic	Metastatic triple-negative breast cancer patient with TP53 tumor mutation experienced 11 months progression-free survival on bortezomib monotherapy without adverse events after ending standard treatments with grade 3 adverse events	MeiÃŸner, T.; Mark, A.; Williams, C.; Berdel, W. E.; Wiebe, S.; Kerkhoff, A.; Wardelmann, E.; Gaiser, T.; MÃ¼ller-Tidow, C.; Rosenstiel, P.; Arnold, N.; Leyland-Jones, B.; Franke, A.; Stanulla, M.; Forster, M.	2017	Cold Spring Harb Mol Case Stud	3	4		10.1101/mcs.a001677
486	No association between germline and somatic	Genomic Analysis Reveals Novel Specific Metastatic Mutations in Chinese Clear Cell Renal Cell Carcinoma	Meng, H.; Jiang, X.; Cui, J.; Yin, G.; Shi, B.; Liu, Q.; Xuan, H.; Wang, Y.	2020	Biomed Res Int	2020		2495157	10.1155/2020/2495157
487	No association between germline and somatic	RET mutation status in medullary thyroid cancer(MTC) patients and the significance of genetic screening for mutations in their immediate relatives--a preliminary report	Menon, M. M.; Simha, M. R.	2005	Indian J Pathol Microbiol	48	2	161-5
488	No association between germline and somatic	Mutation analysis in the BRCA2 gene in primary breast cancers	Miki, Y.; Katagiri, T.; Kasumi, F.; Yoshimoto, T.; Nakamura, Y.	1996	Nat Genet	13	2	245-7	10.1038/ng0696-245
489	No association between germline and somatic	Clinicopathologic Comparison of Lynch Syndrome-associated and "Lynch-like" Endometrial Carcinomas Identified on Universal Screening Using Mismatch Repair Protein Immunohistochemistry	Mills, A. M.; Sloan, E. A.; Thomas, M.; Modesitt, S. C.; Stoler, M. H.; Atkins, K. A.; Moskaluk, C. A.	2016	Am J Surg Pathol	40	2	155-65	10.1097/pas.0000000000000544
490	No association between germline and somatic	PD-L1 overexpression correlates with JAK2-V617F mutational burden and is associated with 9p uniparental disomy in myeloproliferative neoplasms	Milosevic Feenstra, J. D.; JÃ¤ger, R.; Schischlik, F.; Ivanov, D.; Eisenwort, G.; Rumi, E.; Schuster, M.; Gisslinger, B.; Machherndl-Spandl, S.; Bettelheim, P.; Krauth, M. T.; Keil, F.; Bock, C.; Cazzola, M.; Gisslinger, H.; Kralovics, R.; Valent, P.	2022	Am J Hematol	97	4	390-400	10.1002/ajh.26461
491	No association between germline and somatic	Whole-exome sequencing identifies novel MPL and JAK2 mutations in triple-negative myeloproliferative neoplasms	Milosevic Feenstra, J. D.; Nivarthi, H.; Gisslinger, H.; Leroy, E.; Rumi, E.; Chachoua, I.; Bagienski, K.; Kubesova, B.; Pietra, D.; Gisslinger, B.; Milanesi, C.; JÃ¤ger, R.; Chen, D.; Berg, T.; Schalling, M.; Schuster, M.; Bock, C.; Constantinescu, S. N.; Cazzola, M.; Kralovics, R.	2016	Blood	127	3	325-32	10.1182/blood-2015-07-661835
492	No association between germline and somatic	Interplay between human papilloma virus infection and p53 gene alterations in head and neck squamous cell carcinoma of an Indian patient population	Mitra, S.; Banerjee, S.; Misra, C.; Singh, R. K.; Roy, A.; Sengupta, A.; Panda, C. K.; Roychoudhury, S.	2007	J Clin Pathol	60	9	1040-7	10.1136/jcp.2005.034835
493	No association between germline and somatic	Integrated sequence and expression analysis of ovarian cancer structural variants underscores the importance of gene fusion regulation	Mittal, V. K.; McDonald, J. F.	2015	BMC Med Genomics	8		40	10.1186/s12920-015-0118-9
494	No association between germline and somatic	A novel case with germline p53 gene mutation having concurrent multiple primary colon tumours	Miyaki, M.; Iijima, T.; Ohue, M.; Kita, Y.; Hishima, T.; Kuroki, T.; Iwama, T.; Mori, T.	2003	Gut	52	2	304-6	10.1136/gut.52.2.304
495	No association between germline and somatic	Mutations of the PIK3CA gene in hereditary colorectal cancers	Miyaki, M.; Iijima, T.; Yamaguchi, T.; Takahashi, K.; Matsumoto, H.; Yasutome, M.; Funata, N.; Mori, T.	2007	Int J Cancer	121	7	1627-30	10.1002/ijc.22829
496	No association between germline and somatic	Characteristics of somatic mutation of the adenomatous polyposis coli gene in colorectal tumors	Miyaki, M.; Konishi, M.; Kikuchi-Yanoshita, R.; Enomoto, M.; Igari, T.; Tanaka, K.; Muraoka, M.; Takahashi, H.; Amada, Y.; Fukayama, M.; et al.,	1994	Cancer Res	54	11	3011-20
497	No association between germline and somatic	Drastic genetic instability of tumors and normal tissues in Turcot syndrome	Miyaki, M.; Nishio, J.; Konishi, M.; Kikuchi-Yanoshita, R.; Tanaka, K.; Muraoka, M.; Nagato, M.; Chong, J. M.; Koike, M.; Terada, T.; Kawahara, Y.; Fukutome, A.; Tomiyama, J.; Chuganji, Y.; Momoi, M.; Utsunomiya, J.	1997	Oncogene	15	23	2877-81	10.1038/sj.onc.1201668
498	No association between germline and somatic	Difference in the role of loss of heterozygosity at 10p15 (KLF6 locus) in colorectal carcinogenesis between sporadic and familial adenomatous polyposis and hereditary nonpolyposis colorectal cancer patients	Miyaki, M.; Yamaguchi, T.; Iijima, T.; Funata, N.; Mori, T.	2006	Oncology	71	2025-01-02	131-5	10.1159/000100523
499	No association between germline and somatic	Somatic mutations of the CDC4 (FBXW7) gene in hereditary colorectal tumors	Miyaki, M.; Yamaguchi, T.; Iijima, T.; Takahashi, K.; Matsumoto, H.; Mori, T.	2009	Oncology	76	6	430-4	10.1159/000217811
500	No association between germline and somatic	The molecular genetic make-up of male breast cancer	Moelans, C. B.; de Ligt, J.; van der Groep, P.; Prins, P.; Besselink, N. J. M.; Hoogstraat, M.; Ter Hoeve, N. D.; Lacle, M. M.; Kornegoor, R.; van der Pol, C. C.; de Leng, W. W. J.; BarbÃ©, E.; van der Vegt, B.; Martens, J.; Bult, P.; Smit, Vthbm; Koudijs, M. J.; Nijman, I. J.; Voest, E. E.; Selenica, P.; Weigelt, B.; Reis-Filho, J. S.; van der Wall, E.; Cuppen, E.; van Diest, P. J.	2019	Endocr Relat Cancer	26	10	779-794	10.1530/erc-19-0278
501	No association between germline and somatic	Somatic mitochondrial DNA D-loop mutations in meningioma discovered: A preliminary data	Mohamed Yusoff, A. A.; Mohd Khair, S. Z. N.; Wan Abdullah, W. S.; Abd Radzak, S. M.; Abdullah, J. M.	2020	J Cancer Res Ther	16	6	1517-1521	10.4103/jcrt.JCRT_1132_16
502	No association between germline and somatic	Similar response rates and survival with PARP inhibitors for patients with solid tumors harboring somatic versus Germline BRCA mutations: a Meta-analysis and systematic review	Mohyuddin, G. R.; Aziz, M.; Britt, A.; Wade, L.; Sun, W.; Baranda, J.; Al-Rajabi, R.; Saeed, A.; Kasi, A.	2020	BMC Cancer	20	1	507	10.1186/s12885-020-06948-5
503	No association between germline and somatic	Pancreas cancer and BRCA: A critical subset of patients with improving therapeutic outcomes	Momtaz, P.; O'Connor, C. A.; Chou, J. F.; Capanu, M.; Park, W.; Bandlamudi, C.; Berger, M. F.; Kelsen, D. P.; Suehnholz, S. P.; Chakravarty, D.; Yu, K. H.; Varghese, A. M.; Zervoudakis, A.; Li, J.; Ku, G. Y.; Park, J. S.; Shcherba, M.; Harding, J. J.; Goldberg, Z.; Abou-Alfa, G. K.; Salo-Mullen, E. E.; Stadler, Z. K.; Iacobuzio-Donahue, C. A.; O'Reilly, E. M.	2021	Cancer	127	23	4393-4402	10.1002/cncr.33812
504	No association between germline and somatic	Missense mutation of the MET gene detected in human glioma	Moon, Y. W.; Weil, R. J.; Pack, S. D.; Park, W. S.; Pak, E.; Pham, T.; Karkera, J. D.; Kim, H. K.; Vortmeyer, A. O.; Fuller, B. G.; Zhuang, Z.	2000	Mod Pathol	13	9	973-7	10.1038/modpathol.3880177
505	No association between germline and somatic	Maintenance Olaparib in Patients with Newly Diagnosed Advanced Ovarian Cancer	Moore, K.; Colombo, N.; Scambia, G.; Kim, B. G.; Oaknin, A.; Friedlander, M.; Lisyanskaya, A.; Floquet, A.; Leary, A.; Sonke, G. S.; Gourley, C.; Banerjee, S.; Oza, A.; GonzÃ¡lez-MartÃ­n, A.; Aghajanian, C.; Bradley, W.; Mathews, C.; Liu, J.; Lowe, E. S.; Bloomfield, R.; DiSilvestro, P.	2018	N Engl J Med	379	26	2495-2505	10.1056/NEJMoa1810858
506	No association between germline and somatic	Further evidence for heritability of an epimutation in one of 12 cases with MLH1 promoter methylation in blood cells clinically displaying HNPCC	Morak, M.; Schackert, H. K.; Rahner, N.; Betz, B.; Ebert, M.; Walldorf, C.; Royer-Pokora, B.; Schulmann, K.; von Knebel-Doeberitz, M.; Dietmaier, W.; Keller, G.; Kerker, B.; Leitner, G.; Holinski-Feder, E.	2008	Eur J Hum Genet	16	7	804-11	10.1038/ejhg.2008.25
507	No association between germline and somatic	Tumor infiltrating lymphocytes and homologous recombination deficiency are independently associated with improved survival in ovarian carcinoma	Morse, C. B.; Toukatly, M. N.; Kilgore, M. R.; Agnew, K. J.; Bernards, S. S.; Norquist, B. M.; Pennington, K. P.; Garcia, R. L.; Liao, J. B.; Swisher, E. M.	2019	Gynecol Oncol	153	2	217-222	10.1016/j.ygyno.2019.02.011
508	No association between germline and somatic	Microsatellite instability and mutation analysis of hMSH2 and hMLH1 in patients with sporadic, familial and hereditary colorectal cancer	Moslein, G.; Tester, D. J.; Lindor, N. M.; Honchel, R.; Cunningham, J. M.; French, A. J.; Halling, K. C.; Schwab, M.; Goretzki, P.; Thibodeau, S. N.	1996	Hum Mol Genet	5	9	1245-52	10.1093/hmg/5.9.1245
509	No association between germline and somatic	Integrated molecular profiling of juvenile myelomonocytic leukemia	Murakami, N.; Okuno, Y.; Yoshida, K.; Shiraishi, Y.; Nagae, G.; Suzuki, K.; Narita, A.; Sakaguchi, H.; Kawashima, N.; Wang, X.; Xu, Y.; Chiba, K.; Tanaka, H.; Hama, A.; Sanada, M.; Ito, M.; Hirayama, M.; Watanabe, A.; Ueno, T.; Kojima, S.; Aburatani, H.; Mano, H.; Miyano, S.; Ogawa, S.; Takahashi, Y.; Muramatsu, H.	2018	Blood	131	14	1576-1586	10.1182/blood-2017-07-798157
510	No association between germline and somatic	Bi-allelic alterations in DNA repair genes underpin homologous recombination DNA repair defects in breast cancer	Mutter, R. W.; Riaz, N.; Ng, C. K.; Delsite, R.; Piscuoglio, S.; Edelweiss, M.; Martelotto, L. G.; Sakr, R. A.; King, T. A.; Giri, D. D.; Drobnjak, M.; Brogi, E.; Bindra, R.; Bernheim, G.; Lim, R. S.; Blecua, P.; Desrichard, A.; Higginson, D.; Towers, R.; Jiang, R.; Lee, W.; Weigelt, B.; Reis-Filho, J. S.; Powell, S. N.	2017	J Pathol	242	2	165-177	10.1002/path.4890
511	No association between germline and somatic	Somatic hypermethylation of MSH2 is a frequent event in Lynch Syndrome colorectal cancers	Nagasaka, T.; Rhees, J.; Kloor, M.; Gebert, J.; Naomoto, Y.; Boland, C. R.; Goel, A.	2010	Cancer Res	70	8	3098-108	10.1158/0008-5472.Can-09-3290
512	No association between germline and somatic	Japanese version of The Cancer Genome Atlas, JCGA, established using fresh frozen tumors obtained from 5143 cancer patients	Nagashima, T.; Yamaguchi, K.; Urakami, K.; Shimoda, Y.; Ohnami, S.; Ohshima, K.; Tanabe, T.; Naruoka, A.; Kamada, F.; Serizawa, M.; Hatakeyama, K.; Matsumura, K.; Ohnami, S.; Maruyama, K.; Mochizuki, T.; Kusuhara, M.; Shiomi, A.; Ohde, Y.; Terashima, M.; Uesaka, K.; Onitsuka, T.; Nishimura, S.; Hirashima, Y.; Hayashi, N.; Kiyohara, Y.; Tsubosa, Y.; Katagiri, H.; Niwakawa, M.; Takahashi, K.; Kashi…	2020	Cancer Sci	111	2	687-699	10.1111/cas.14290
513	No association between germline and somatic	Endometrial cancer risk and survival by tumor MMR status	Nagle, C. M.; O'Mara, T. A.; Tan, Y.; Buchanan, D. D.; Obermair, A.; Blomfield, P.; Quinn, M. A.; Webb, P. M.; Spurdle, A. B.	2018	J Gynecol Oncol	29	3	e39	10.3802/jgo.2018.29.e39
514	No association between germline and somatic	Germline and Somatic mutations in postmenopausal breast cancer patients	Nagy, T. R.; Maistro, S.; Encinas, G.; Katayama, M. L. H.; Pereira, G. F. L.; Gaburo-JÃºnior, N.; Franco, L. A. M.; GouvÃªa, Acrc; Diz, Mdpe; Leite, L. A. S.; Folgueira, Maak	2021	Clinics (Sao Paulo)	76		e2837	10.6061/clinics/2021/e2837
515	No association between germline and somatic	Investigation of the Birt-Hogg-Dube tumour suppressor gene (FLCN) in familial and sporadic colorectal cancer	Nahorski, M. S.; Lim, D. H.; Martin, L.; Gille, J. J.; McKay, K.; Rehal, P. K.; Ploeger, H. M.; van Steensel, M.; Tomlinson, I. P.; Latif, F.; Menko, F. H.; Maher, E. R.	2010	J Med Genet	47	6	385-90	10.1136/jmg.2009.073304
516	No association between germline and somatic	[Early diagnosis of retinoblastoma: usefulness of searching for RB1 gene mutations]	NÃ¡jera, C.; SÃ¡nchez, F.; Mateu, E.; Prieto, F.; Beneyto, M.	2001	Med Clin (Barc)	116	10	365-72	10.1016/s0025-7753(01)71832-5
517	No association between germline and somatic	Expression of IGF-1 receptor in KIT/PDGF receptor-Î± wild-type gastrointestinal stromal tumors with succinate dehydrogenase complex dysfunction	Nannini, M.; Astolfi, A.; Paterini, P.; Urbini, M.; Santini, D.; Catena, F.; Indio, V.; Casadio, R.; Pinna, A. D.; Biasco, G.; Pantaleo, M. A.	2013	Future Oncol	9	1	121-6	10.2217/fon.12.170
518	No association between germline and somatic	A family harboring a germ-line N-terminal C/EBPalpha mutation and development of acute myeloid leukemia with an additional somatic C-terminal C/EBPalpha mutation	Nanri, T.; Uike, N.; Kawakita, T.; Iwanaga, E.; Mitsuya, H.; Asou, N.	2010	Genes Chromosomes Cancer	49	3	237-41	10.1002/gcc.20734
519	No association between germline and somatic	Genomic profiling of multiple tissues in two patients with multiple endocrine neoplasia type 1	Naruoka, A.; Ohnami, S.; Nagashima, T.; Serizawa, M.; Hatakeyama, K.; Ohshima, K.; Ohnami, S.; Urakami, K.; Horiuchi, Y.; Kiyozumi, Y.; Matsubayashi, H.; Abe, M.; Ohishi, T.; Kameya, T.; Sugino, T.; Onitsuka, T.; Isaka, M.; Ohde, Y.; Sugiura, T.; Ito, T.; Uesaka, K.; Akiyama, Y.; Kusuhara, M.; Yamaguchi, K.	2021	Biomed Res	42	2	89-94	10.2220/biomedres.42.89
520	No association between germline and somatic	A whole-genome massively parallel sequencing analysis of BRCA1 mutant oestrogen receptor-negative and -positive breast cancers	Natrajan, R.; Mackay, A.; Lambros, M. B.; Weigelt, B.; Wilkerson, P. M.; Manie, E.; Grigoriadis, A.; A'Hern, R.; van der Groep, P.; Kozarewa, I.; Popova, T.; Mariani, O.; Turaljic, S.; Furney, S. J.; Marais, R.; Rodruigues, D. N.; Flora, A. C.; Wai, P.; Pawar, V.; McDade, S.; Carroll, J.; Stoppa-Lyonnet, D.; Green, A. R.; Ellis, I. O.; Swanton, C.; van Diest, P.; Delattre, O.; Lord, C. J.; Foulke…	2012	J Pathol	227	1	29-41	10.1002/path.4003
521	No association between germline and somatic	The mutational profile of immune surveillance genes in diagnostic and refractory/relapsed DLBCLs	Nesic, M.; SÃ¸nderkÃ¦r, M.; BrÃ¸ndum, R. F.; El-Galaly, T. C.; Pedersen, I. S.; BÃ¸gsted, M.; DybkÃ¦r, K.	2021	BMC Cancer	21	1	829	10.1186/s12885-021-08556-3
522	No association between germline and somatic	Small fraction of testicular cancer cases may be causatively related to CHEK2 inactivating germ-line mutations: evidence for somatic loss of the remaining CHEK2 allele in the tumor tissue	Ni, V. I.; Ivantsov, A. O.; Kotkova, M. A.; Baskina, S. V.; Ponomareva, E. V.; Orlova, R. V.; Topuzov, E. E.; Kryukov, K. K.; Shelekhova, K. V.; Aleksakhina, S. N.; Sokolenko, A. P.; Imyanitov, E. N.	2021	Fam Cancer	20	1	49-53	10.1007/s10689-020-00190-5
523	No association between germline and somatic	Germline and somatic SDHx alterations in apparently sporadic differentiated thyroid cancer	Ni, Y.; Seballos, S.; Ganapathi, S.; Gurin, D.; Fletcher, B.; Ngeow, J.; Nagy, R.; Kloos, R. T.; Ringel, M. D.; LaFramboise, T.; Eng, C.	2015	Endocr Relat Cancer	22	2	121-30	10.1530/erc-14-0537
524	No association between germline and somatic	Ovarian Sertoli-Leydig Cell Tumor, Multinodular Goiter, Cystic Nephromas and DICER1 Mutations: Case Report and Literature Review	Ni, Y.; Zhou, X.; Wu, L.; Wu, P.; Liu, Y.; Li, Y.; Cai, L.; Fu, X.; Zhang, C.	2021	Pharmgenomics Pers Med	14		947-953	10.2147/pgpm.S317153
525	No association between germline and somatic	Somatic alterations contributing to metastasis of a castration-resistant prostate cancer	Nickerson, M. L.; Im, K. M.; Misner, K. J.; Tan, W.; Lou, H.; Gold, B.; Wells, D. W.; Bravo, H. C.; Fredrikson, K. M.; Harkins, T. T.; Milos, P.; Zbar, B.; Linehan, W. M.; Yeager, M.; Andresson, T.; Dean, M.; Bova, G. S.	2013	Hum Mutat	34	9	1231-41	10.1002/humu.22346
526	No association between germline and somatic	Diagnostic value of JAK2 V617F somatic mutation for myeloproliferative cancer in 49Â 488 individuals from the general population	Nielsen, C.; Birgens, H. S.; Nordestgaard, B. G.; Bojesen, S. E.	2013	Br J Haematol	160	1	70-9	10.1111/bjh.12099
527	No association between germline and somatic	Colorectal carcinomas in MUTYH-associated polyposis display histopathological similarities to microsatellite unstable carcinomas	Nielsen, M.; de Miranda, N. F.; van Puijenbroek, M.; Jordanova, E. S.; Middeldorp, A.; van Wezel, T.; van Eijk, R.; Tops, C. M.; Vasen, H. F.; Hes, F. J.; Morreau, H.	2009	BMC Cancer	9		184	10.1186/1471-2407-9-184
528	No association between germline and somatic	Succinate Dehydrogenase (SDH)-Deficient Pancreatic Neuroendocrine Tumor Expands the SDH-Related Tumor Spectrum	Niemeijer, N. D.; Papathomas, T. G.; Korpershoek, E.; de Krijger, R. R.; Oudijk, L.; Morreau, H.; Bayley, J. P.; Hes, F. J.; Jansen, J. C.; Dinjens, W. N.; Corssmit, E. P.	2015	J Clin Endocrinol Metab	100	10	E1386-93	10.1210/jc.2015-2689
529	No association between germline and somatic	Thyroid Carcinomas That Occur in Familial Adenomatous Polyposis Patients Recurrently Harbor Somatic Variants in APC, BRAF, and KTM2D	Nieminen, T. T.; Walker, C. J.; Olkinuora, A.; Genutis, L. K.; O'Malley, M.; Wakely, P. E.; LaGuardia, L.; Koskenvuo, L.; Arola, J.; LepistÃ¶, A. H.; Brock, P.; Yilmaz, A. S.; Eisfeld, A. K.; Church, J. M.; PeltomÃ¤ki, P.; de la Chapelle, A.	2020	Thyroid	30	3	380-388	10.1089/thy.2019.0561
530	No association between germline and somatic	Mutations of chromosome 5q21 genes in FAP and colorectal cancer patients	Nishisho, I.; Nakamura, Y.; Miyoshi, Y.; Miki, Y.; Ando, H.; Horii, A.; Koyama, K.; Utsunomiya, J.; Baba, S.; Hedge, P.	1991	Science	253	5020	665-9	10.1126/science.1651563
531	No association between germline and somatic	Mutation analysis of therapy-related myeloid neoplasms	Nishiyama, T.; Ishikawa, Y.; Kawashima, N.; Akashi, A.; Adachi, Y.; Hattori, H.; Ushijima, Y.; Kiyoi, H.	2018	Cancer Genet	222-223		38-45	10.1016/j.cancergen.2018.02.006
[truncated: 1,183 more rows]

## Sheet: S3
Germline-Somatic Data Pairs and Number of Studies Evaluating (of 197) in Systematic Review
[truncated: 14,704 more rows]
[truncated: 2 more columns]
